# Supplementary material
Source: publisher figshare collection journal article supplement (https://acs.figshare.com/ndownloader/files/4774966)
Supplement: Supplementary file 1 [file 4774966]

data_manuscript_title
' '

_audit_creation_method            SHELXL

_pub_requested_journal 'Inorg. Chem.'

_publ_contact_author_name
      'Javier A. Cabeza'
_publ_contact_author_address
;
      Departamento de Qu\'imica Org\'anica e Inorg\'anica 
       Facultad de Qu\'imica 
       Universidad de Oviedo 
       Avda. Juli\'an Claver\'ia, 8 
       33006 Oviedo 
       Spain 
;
_publ_contact_author_email
    'jac@fq.uniovi.es'
_publ_contact_author_fax
     '+34 985 103501'
_publ_contact_author_phone
    '+34 985 103501'

loop_
_publ_author_name   
_publ_author_address   
      'Javier A. Cabeza'
;
Departamento de Qu\'imica Org\'anica e Inorg\'anica 
       Facultad de Qu\'imica 
       Universidad de Oviedo 
       Avda. Juli\'an Claver\'ia, 8 
       33006 Oviedo 
       Spain 
;
      'Ignacio del R\'io'
;
Departamento de Qu\'imica Org\'anica e Inorg\'anica 
       Facultad de Qu\'imica 
       Universidad de Oviedo 
       Avda. Juli\'an Claver\'ia, 8 
       33006 Oviedo 
       Spain 
;
      'Pablo Garc\'ia'
;
Departamento de Qu\'imica Org\'anica e Inorg\'anica 
       Facultad de Qu\'imica 
       Universidad de Oviedo 
       Avda. Juli\'an Claver\'ia, 8 
       33006 Oviedo 
       Spain 
;
     'Daniel Miguel'
;
     Departamento de Quimica Inorganica
     Facultad de Ciencias
     Universidad de Valladolid
     47071 Valladolid
     SPAIN
; 
#-------------------------- data section of block ---------------------------
 
data_2_(pg106ff1)
_audit_creation_method            SHELXL-97
_chemical_name_systematic
;
 ?
;
_chemical_name_common             ?
_chemical_melting_point           ?
_chemical_formula_moiety          
 'C25 H12 N4 O13 Ru5'
_chemical_formula_sum
 'C25 H12 N4 O13 Ru5'
_chemical_formula_weight          1081.74
_chemical_compound_source
;
Synthesis. 
;
 
loop_
 _atom_type_symbol
 _atom_type_description
 _atom_type_scat_dispersion_real
 _atom_type_scat_dispersion_imag
 _atom_type_scat_source
 'C'  'C'   0.0180   0.0090
 'International Tables Vol C Tables 4.2.6.8 and 6.1.1.4'
 'H'  'H'   0.0000   0.0000
 'International Tables Vol C Tables 4.2.6.8 and 6.1.1.4'
 'N'  'N'   0.0310   0.0180
 'International Tables Vol C Tables 4.2.6.8 and 6.1.1.4'
 'O'  'O'   0.0490   0.0320
 'International Tables Vol C Tables 4.2.6.8 and 6.1.1.4'
 'Ru'  'Ru'   0.0550   3.2960
 'International Tables Vol C Tables 4.2.6.8 and 6.1.1.4'
 
_symmetry_cell_setting            'monoclinic'
_symmetry_space_group_name_H-M    'P 21/c'
_symmetry_space_group_name_Hall    '-P 2ybc'
 
loop_
 _symmetry_equiv_pos_as_xyz
 'x, y, z'
 '-x, y+1/2, -z+1/2'
 '-x, -y, -z'
 'x, -y-1/2, z-1/2'
 
_cell_length_a                    15.5476(2)
_cell_length_b                    10.24370(10)
_cell_length_c                    20.8661(2)
_cell_angle_alpha                 90.00
_cell_angle_beta                  90.2120(10)
_cell_angle_gamma                 90.00
_cell_volume                      3323.22(6)
_cell_formula_units_Z             4
_cell_measurement_temperature     293(2)
_cell_measurement_reflns_used     5110
_cell_measurement_theta_min        2.209
_cell_measurement_theta_max        70.076
 
_exptl_crystal_description        'blocks'
_exptl_crystal_colour             'dark red'
_exptl_crystal_size_max           0.15
_exptl_crystal_size_mid           0.10
_exptl_crystal_size_min           0.10
_exptl_crystal_density_meas       ?
_exptl_crystal_density_diffrn     2.162
_exptl_crystal_density_method     'not measured'
_exptl_crystal_F_000              2056
_exptl_absorpt_coefficient_mu     18.584
_exptl_absorpt_correction_type       refdelf
_exptl_absorpt_process_details
;
Parkin S,Moezzi B & Hope H, (1995) J. Appl. Cryst. 28, 53-56
Cubic fit to sin(theta)/lambda - 24 parameters
;
_exptl_absorpt_correction_T_min      0.156
_exptl_absorpt_correction_T_max      0.161
 
_exptl_special_details
;
 ?
;
 
_diffrn_ambient_temperature       293(2)
_diffrn_radiation_wavelength      1.54178
_diffrn_radiation_type            CuK\a
_diffrn_radiation_source          'fine-focus sealed tube'
_diffrn_measurement_device_type  'KappaCCD'
_diffrn_measurement_device  '95mm CCD camera on \k-goniostat'
_diffrn_detector_area_resol_mean    9
_diffrn_radiation_monochromator        'horizontally mounted graphite crystal'
_diffrn_measurement_method       'CCD'
_diffrn_standards_number          ?
_diffrn_standards_interval_count  ?
_diffrn_standards_interval_time   ?
_diffrn_standards_decay_%         ?
_diffrn_reflns_number             11332
_diffrn_reflns_av_R_equivalents   0.0000
_diffrn_reflns_av_sigmaI/netI     0.0457
_diffrn_reflns_limit_h_min        0
_diffrn_reflns_limit_h_max        18
_diffrn_reflns_limit_k_min        0
_diffrn_reflns_limit_k_max        12
_diffrn_reflns_limit_l_min        -23
_diffrn_reflns_limit_l_max        24
_diffrn_reflns_theta_min          2.84
_diffrn_reflns_theta_max          68.06
_reflns_number_total              5871
_reflns_number_gt                 5636
_reflns_threshold_expression      >2sigma(I)
 
_computing_data_collection        'Collect (Nonius BV, 1997-2000)'
_computing_cell_refinement 
'HKL Scalepack (Otwinowski & Minor 1997)'
_computing_data_reduction 
'HKL Denzo and Scalepack (Otwinowski & Minor 1997)'
_computing_structure_solution     'DIRDIF-96 (Beurskens et al., 1996)'
_computing_structure_refinement   'SHELXL-97 (Sheldrick, 1997)'
_computing_molecular_graphics     'EUCLID (Spek, 1982)'
_computing_publication_material   'SHELXL-97 (Sheldrick, 1997)'
 
_refine_special_details
;
 Refinement of F^2^ against ALL reflections.  The weighted R-factor wR and
 goodness of fit S are based on F^2^, conventional R-factors R are based
 on F, with F set to zero for negative F^2^. The threshold expression of
 F^2^ > 2sigma(F^2^) is used only for calculating R-factors(gt) etc. and is
 not relevant to the choice of reflections for refinement.  R-factors based
 on F^2^ are statistically about twice as large as those based on F, and R-
 factors based on ALL data will be even larger.
;
 
_refine_ls_structure_factor_coef  Fsqd
_refine_ls_matrix_type            full
_refine_ls_weighting_scheme       calc
_refine_ls_weighting_details
 'calc w=1/[\s^2^(Fo^2^)+(0.0466P)^2^+8.9021P] where P=(Fo^2^+2Fc^2^)/3'
_atom_sites_solution_primary      direct
_atom_sites_solution_secondary    difmap
_atom_sites_solution_hydrogens    geom
_refine_ls_hydrogen_treatment     constr
_refine_ls_extinction_method      none
_refine_ls_extinction_coef        ?
_refine_ls_number_reflns          5871
_refine_ls_number_parameters      424
_refine_ls_number_restraints      0
_refine_ls_R_factor_all           0.0390
_refine_ls_R_factor_gt            0.0376
_refine_ls_wR_factor_ref          0.0967
_refine_ls_wR_factor_gt           0.0956
_refine_ls_goodness_of_fit_ref    1.099
_refine_ls_restrained_S_all       1.099
_refine_ls_shift/su_max           0.001
_refine_ls_shift/su_mean          0.000
 
loop_
 _atom_site_label
 _atom_site_type_symbol
 _atom_site_fract_x
 _atom_site_fract_y
 _atom_site_fract_z
 _atom_site_U_iso_or_equiv
 _atom_site_adp_type
 _atom_site_occupancy
 _atom_site_symmetry_multiplicity
 _atom_site_calc_flag
 _atom_site_refinement_flags
 _atom_site_disorder_assembly
 _atom_site_disorder_group
C1 C 0.1809(3) 0.0330(4) 0.0593(2) 0.0228(9) Uani 1 1 d . . .
C2 C 0.1427(4) -0.0502(5) 0.0145(2) 0.0358(12) Uani 1 1 d . . .
H2 H 0.1476 -0.1403 0.0187 0.043 Uiso 1 1 calc R . .
C3 C 0.0969(4) 0.0042(6) -0.0367(3) 0.0424(13) Uani 1 1 d . . .
H3 H 0.0709 -0.0498 -0.0669 0.051 Uiso 1 1 calc R . .
C4 C 0.0904(4) 0.1366(6) -0.0424(3) 0.0407(13) Uani 1 1 d . . .
H4 H 0.0604 0.1732 -0.0766 0.049 Uiso 1 1 calc R . .
C5 C 0.1293(4) 0.2172(5) 0.0038(2) 0.0349(11) Uani 1 1 d . . .
C6 C 0.1221(5) 0.3617(6) 0.0006(3) 0.0552(17) Uani 1 1 d . . .
H6A H 0.0627 0.3864 0.0025 0.083 Uiso 1 1 calc R . .
H6B H 0.1465 0.3922 -0.0388 0.083 Uiso 1 1 calc R . .
H6C H 0.1526 0.3998 0.0361 0.083 Uiso 1 1 calc R . .
C7 C 0.3533(3) -0.0459(4) 0.2759(2) 0.0229(9) Uani 1 1 d . . .
C8 C 0.4328(3) 0.0080(6) 0.2938(3) 0.0392(13) Uani 1 1 d . . .
H8 H 0.4653 0.0552 0.2645 0.047 Uiso 1 1 calc R . .
C9 C 0.4626(4) -0.0106(7) 0.3567(3) 0.0520(16) Uani 1 1 d . . .
H9 H 0.5154 0.0245 0.3687 0.062 Uiso 1 1 calc R . .
C10 C 0.4155(4) -0.0798(7) 0.4013(3) 0.0478(15) Uani 1 1 d . . .
H10 H 0.4356 -0.0899 0.4430 0.057 Uiso 1 1 calc R . .
C11 C 0.3380(3) -0.1338(6) 0.3826(2) 0.0358(12) Uani 1 1 d . . .
C12 C 0.2885(4) -0.2153(8) 0.4306(3) 0.0598(19) Uani 1 1 d . . .
H12A H 0.3231 -0.2881 0.4439 0.090 Uiso 1 1 calc R . .
H12B H 0.2364 -0.2467 0.4110 0.090 Uiso 1 1 calc R . .
H12C H 0.2746 -0.1628 0.4672 0.090 Uiso 1 1 calc R . .
C101 C 0.3162(4) 0.3564(6) 0.0840(3) 0.0476(15) Uani 1 1 d . . .
C102 C 0.1576(4) 0.3367(6) 0.1735(3) 0.0426(13) Uani 1 1 d . . .
C103 C 0.3216(4) 0.2714(5) 0.2100(3) 0.0457(14) Uani 1 1 d . . .
C200 C 0.3899(4) -0.1614(6) 0.0985(3) 0.0418(13) Uani 1 1 d . . .
C201 C 0.3780(4) 0.0758(7) 0.0296(3) 0.0498(15) Uani 1 1 d . . .
C202 C 0.4788(4) 0.0727(6) 0.1342(3) 0.0467(14) Uani 1 1 d . . .
C301 C 0.0680(3) 0.0520(5) 0.1905(2) 0.0343(11) Uani 1 1 d . . .
C302 C 0.1713(3) 0.1033(5) 0.2928(3) 0.0351(12) Uani 1 1 d . . .
C401 C 0.2069(4) -0.3026(5) 0.1068(3) 0.0340(12) Uani 1 1 d . . .
C402 C 0.3243(3) -0.3228(5) 0.2004(3) 0.0350(12) Uani 1 1 d . . .
C501 C 0.1143(3) -0.1599(6) 0.3506(3) 0.0395(13) Uani 1 1 d . . .
C502 C 0.2031(3) -0.3757(5) 0.3078(3) 0.0360(12) Uani 1 1 d . . .
C503 C 0.0925(3) -0.2400(5) 0.2239(3) 0.0349(12) Uani 1 1 d . . .
N1 N 0.2296(2) -0.0019(4) 0.11535(18) 0.0232(8) Uani 1 1 d . . .
N2 N 0.1747(3) 0.1634(4) 0.05413(18) 0.0265(8) Uani 1 1 d . . .
N3 N 0.3165(2) -0.0245(3) 0.21480(18) 0.0221(8) Uani 1 1 d . . .
N4 N 0.3069(2) -0.1179(4) 0.31997(18) 0.0251(8) Uani 1 1 d . . .
O101 O 0.3527(4) 0.4321(6) 0.0555(3) 0.0821(17) Uani 1 1 d . . .
O102 O 0.1074(4) 0.4028(6) 0.1962(3) 0.0783(16) Uani 1 1 d . . .
O103 O 0.3626(4) 0.2939(5) 0.2546(3) 0.0740(16) Uani 1 1 d . . .
O200 O 0.4332(3) -0.2384(4) 0.0723(2) 0.0600(13) Uani 1 1 d . . .
O201 O 0.3866(4) 0.1072(7) -0.0236(3) 0.0883(19) Uani 1 1 d . . .
O202 O 0.5499(3) 0.1001(7) 0.1429(3) 0.0856(18) Uani 1 1 d . . .
O301 O -0.0034(3) 0.0648(5) 0.1788(2) 0.0585(12) Uani 1 1 d . . .
O302 O 0.1672(4) 0.1571(5) 0.3419(2) 0.0682(14) Uani 1 1 d . . .
O401 O 0.1663(4) -0.3731(4) 0.0771(2) 0.0674(14) Uani 1 1 d . . .
O402 O 0.3617(3) -0.4091(4) 0.2205(2) 0.0595(13) Uani 1 1 d . . .
O501 O 0.0674(3) -0.1363(6) 0.3914(2) 0.0716(15) Uani 1 1 d . . .
O502 O 0.2108(3) -0.4823(4) 0.3219(3) 0.0649(13) Uani 1 1 d . . .
O503 O 0.0344(3) -0.2662(5) 0.1931(2) 0.0547(11) Uani 1 1 d . . .
Ru1 Ru 0.25020(2) 0.23743(3) 0.136279(18) 0.02802(12) Uani 1 1 d . . .
Ru2 Ru 0.36380(2) 0.02478(3) 0.118417(18) 0.02692(12) Uani 1 1 d . . .
Ru3 Ru 0.18474(2) 0.02622(3) 0.209220(16) 0.01962(11) Uani 1 1 d . . .
Ru4 Ru 0.26813(2) -0.18165(3) 0.159185(16) 0.02133(11) Uani 1 1 d . . .
Ru5 Ru 0.18714(2) -0.19829(3) 0.278949(17) 0.02317(11) Uani 1 1 d . . .
 
loop_
 _atom_site_aniso_label
 _atom_site_aniso_U_11
 _atom_site_aniso_U_22
 _atom_site_aniso_U_33
 _atom_site_aniso_U_23
 _atom_site_aniso_U_13
 _atom_site_aniso_U_12
C1 0.024(2) 0.026(2) 0.018(2) -0.0020(17) 0.0030(18) -0.0025(17)
C2 0.048(3) 0.035(3) 0.025(3) -0.005(2) -0.005(2) -0.002(2)
C3 0.048(3) 0.048(3) 0.032(3) -0.009(2) -0.012(3) -0.007(3)
C4 0.050(3) 0.043(3) 0.029(3) 0.011(2) -0.013(2) -0.003(3)
C5 0.045(3) 0.034(3) 0.026(3) 0.007(2) -0.004(2) -0.001(2)
C6 0.086(5) 0.032(3) 0.047(4) 0.009(3) -0.015(3) 0.008(3)
C7 0.018(2) 0.027(2) 0.024(2) 0.0026(19) -0.0032(18) 0.0004(17)
C8 0.028(3) 0.047(3) 0.043(3) 0.010(3) -0.005(2) -0.009(2)
C9 0.041(3) 0.060(4) 0.055(4) 0.010(3) -0.023(3) -0.019(3)
C10 0.044(3) 0.066(4) 0.033(3) 0.008(3) -0.016(3) -0.010(3)
C11 0.030(3) 0.049(3) 0.028(3) 0.005(2) -0.007(2) 0.003(2)
C12 0.044(4) 0.105(6) 0.031(3) 0.023(3) -0.006(3) -0.013(4)
C101 0.056(4) 0.041(3) 0.046(3) 0.011(3) -0.016(3) -0.019(3)
C102 0.051(3) 0.035(3) 0.042(3) -0.006(2) -0.006(3) 0.007(3)
C103 0.059(4) 0.023(2) 0.055(4) 0.003(2) -0.018(3) -0.003(2)
C200 0.038(3) 0.044(3) 0.043(3) 0.003(3) 0.006(3) 0.006(2)
C201 0.043(3) 0.058(4) 0.048(4) 0.010(3) 0.019(3) -0.003(3)
C202 0.036(3) 0.053(4) 0.051(4) 0.007(3) 0.010(3) -0.016(3)
C301 0.033(3) 0.041(3) 0.029(3) -0.002(2) 0.004(2) 0.011(2)
C302 0.037(3) 0.036(3) 0.032(3) -0.005(2) -0.001(2) 0.010(2)
C401 0.047(3) 0.022(2) 0.033(3) -0.005(2) 0.000(2) -0.001(2)
C402 0.033(3) 0.033(3) 0.039(3) 0.000(2) 0.010(2) 0.005(2)
C501 0.030(3) 0.050(3) 0.039(3) 0.000(3) 0.006(2) -0.006(2)
C502 0.030(3) 0.040(3) 0.037(3) 0.006(2) 0.004(2) -0.003(2)
C503 0.031(3) 0.040(3) 0.034(3) 0.004(2) 0.003(2) -0.007(2)
N1 0.027(2) 0.0190(17) 0.024(2) 0.0010(15) 0.0071(16) -0.0013(15)
N2 0.033(2) 0.027(2) 0.020(2) 0.0037(16) -0.0022(16) -0.0024(16)
N3 0.0210(19) 0.0219(19) 0.023(2) 0.0008(15) 0.0059(15) -0.0030(14)
N4 0.0201(18) 0.029(2) 0.026(2) 0.0026(16) -0.0012(15) -0.0042(15)
O101 0.084(4) 0.082(4) 0.080(4) 0.037(3) -0.003(3) -0.044(3)
O102 0.084(4) 0.074(4) 0.076(4) -0.016(3) 0.007(3) 0.033(3)
O103 0.100(4) 0.052(3) 0.069(3) -0.006(2) -0.052(3) -0.012(3)
O200 0.054(3) 0.049(3) 0.077(3) -0.012(2) 0.030(2) 0.011(2)
O201 0.102(4) 0.117(5) 0.047(3) 0.027(3) 0.024(3) -0.010(4)
O202 0.039(3) 0.125(5) 0.093(4) 0.007(4) 0.004(3) -0.036(3)
O301 0.029(2) 0.091(3) 0.055(3) -0.017(2) -0.0131(19) 0.023(2)
O302 0.094(4) 0.071(3) 0.039(3) -0.024(2) 0.003(2) 0.016(3)
O401 0.098(4) 0.038(2) 0.067(3) -0.015(2) -0.019(3) -0.021(2)
O402 0.051(2) 0.045(2) 0.083(3) 0.025(2) 0.010(2) 0.025(2)
O501 0.048(3) 0.104(4) 0.063(3) -0.017(3) 0.027(2) -0.002(3)
O502 0.077(3) 0.033(2) 0.085(3) 0.021(2) 0.008(3) 0.004(2)
O503 0.036(2) 0.075(3) 0.053(3) 0.004(2) -0.017(2) -0.019(2)
Ru1 0.0364(2) 0.01903(19) 0.0286(2) 0.00131(14) -0.00479(16) -0.00393(14)
Ru2 0.0218(2) 0.0295(2) 0.0294(2) 0.00329(14) 0.00624(15) -0.00426(13)
Ru3 0.01901(19) 0.02050(19) 0.0193(2) -0.00141(12) 0.00019(14) 0.00271(12)
Ru4 0.02084(19) 0.01930(18) 0.0239(2) -0.00105(13) 0.00342(14) 0.00163(12)
Ru5 0.01798(19) 0.02717(19) 0.0244(2) 0.00463(14) 0.00184(14) -0.00447(13)
 
_geom_special_details
;
 All esds (except the esd in the dihedral angle between two l.s. planes)
 are estimated using the full covariance matrix.  The cell esds are taken
 into account individually in the estimation of esds in distances, angles
 and torsion angles; correlations between esds in cell parameters are only
 used when they are defined by crystal symmetry.  An approximate (isotropic)
 treatment of cell esds is used for estimating esds involving l.s. planes.
;
 
loop_
 _geom_bond_atom_site_label_1
 _geom_bond_atom_site_label_2
 _geom_bond_distance
 _geom_bond_site_symmetry_2
 _geom_bond_publ_flag
C1 N2 1.344(6) . ?
C1 C2 1.396(7) . ?
C1 N1 1.436(6) . ?
C2 C3 1.397(8) . ?
C2 H2 0.9300 . ?
C3 C4 1.366(8) . ?
C3 H3 0.9300 . ?
C4 C5 1.405(8) . ?
C4 H4 0.9300 . ?
C5 N2 1.378(6) . ?
C5 C6 1.485(8) . ?
C6 H6A 0.9600 . ?
C6 H6B 0.9600 . ?
C6 H6C 0.9600 . ?
C7 N4 1.384(6) . ?
C7 C8 1.404(7) . ?
C7 N3 1.412(6) . ?
C8 C9 1.403(9) . ?
C8 H8 0.9300 . ?
C9 C10 1.382(9) . ?
C9 H9 0.9300 . ?
C10 C11 1.380(8) . ?
C10 H10 0.9300 . ?
C11 N4 1.401(6) . ?
C11 C12 1.517(8) . ?
C12 H12A 0.9600 . ?
C12 H12B 0.9600 . ?
C12 H12C 0.9600 . ?
C101 O101 1.131(7) . ?
C101 Ru1 1.933(6) . ?
C102 O102 1.139(7) . ?
C102 Ru1 1.928(6) . ?
C103 O103 1.150(7) . ?
C103 Ru1 1.926(6) . ?
C200 O200 1.174(7) . ?
C200 Ru2 1.993(6) . ?
C200 Ru4 2.291(6) . ?
C201 O201 1.164(8) . ?
C201 Ru2 1.939(6) . ?
C202 O202 1.155(7) . ?
C202 Ru2 1.882(6) . ?
C301 O301 1.144(7) . ?
C301 Ru3 1.874(5) . ?
C302 O302 1.167(7) . ?
C302 Ru3 1.926(5) . ?
C401 O401 1.141(7) . ?
C401 Ru4 1.905(5) . ?
C402 O402 1.137(7) . ?
C402 Ru4 1.895(5) . ?
C501 O501 1.149(7) . ?
C501 Ru5 1.919(5) . ?
C502 O502 1.137(7) . ?
C502 Ru5 1.931(6) . ?
C503 O503 1.139(7) . ?
C503 Ru5 1.911(6) . ?
N1 Ru3 2.102(4) . ?
N1 Ru2 2.105(4) . ?
N1 Ru4 2.140(4) . ?
N1 Ru1 2.511(4) . ?
N2 Ru1 2.208(4) . ?
N3 Ru3 2.116(4) . ?
N3 Ru4 2.121(4) . ?
N3 Ru2 2.203(4) . ?
N4 Ru5 2.207(4) . ?
Ru1 Ru2 2.8299(5) . ?
Ru1 Ru3 2.8363(5) . ?
Ru2 Ru4 2.7234(5) . ?
Ru3 Ru4 2.7047(4) . ?
Ru3 Ru5 2.7216(5) . ?
Ru4 Ru5 2.8077(5) . ?
 
loop_
 _geom_angle_atom_site_label_1
 _geom_angle_atom_site_label_2
 _geom_angle_atom_site_label_3
 _geom_angle
 _geom_angle_site_symmetry_1
 _geom_angle_site_symmetry_3
 _geom_angle_publ_flag
N2 C1 C2 121.5(4) . . ?
N2 C1 N1 110.5(4) . . ?
C2 C1 N1 128.0(4) . . ?
C1 C2 C3 118.9(5) . . ?
C1 C2 H2 120.6 . . ?
C3 C2 H2 120.6 . . ?
C4 C3 C2 120.0(5) . . ?
C4 C3 H3 120.0 . . ?
C2 C3 H3 120.0 . . ?
C3 C4 C5 119.5(5) . . ?
C3 C4 H4 120.3 . . ?
C5 C4 H4 120.3 . . ?
N2 C5 C4 120.4(5) . . ?
N2 C5 C6 118.1(5) . . ?
C4 C5 C6 121.5(5) . . ?
C5 C6 H6A 109.5 . . ?
C5 C6 H6B 109.5 . . ?
H6A C6 H6B 109.5 . . ?
C5 C6 H6C 109.5 . . ?
H6A C6 H6C 109.5 . . ?
H6B C6 H6C 109.5 . . ?
N4 C7 C8 119.5(4) . . ?
N4 C7 N3 118.2(4) . . ?
C8 C7 N3 122.2(4) . . ?
C9 C8 C7 118.9(5) . . ?
C9 C8 H8 120.6 . . ?
C7 C8 H8 120.6 . . ?
C10 C9 C8 121.7(5) . . ?
C10 C9 H9 119.1 . . ?
C8 C9 H9 119.1 . . ?
C11 C10 C9 118.6(5) . . ?
C11 C10 H10 120.7 . . ?
C9 C10 H10 120.7 . . ?
C10 C11 N4 121.0(5) . . ?
C10 C11 C12 118.6(5) . . ?
N4 C11 C12 120.4(5) . . ?
C11 C12 H12A 109.5 . . ?
C11 C12 H12B 109.5 . . ?
H12A C12 H12B 109.5 . . ?
C11 C12 H12C 109.5 . . ?
H12A C12 H12C 109.5 . . ?
H12B C12 H12C 109.5 . . ?
O101 C101 Ru1 175.8(7) . . ?
O102 C102 Ru1 174.7(6) . . ?
O103 C103 Ru1 178.2(6) . . ?
O200 C200 Ru2 149.1(5) . . ?
O200 C200 Ru4 132.3(5) . . ?
Ru2 C200 Ru4 78.61(19) . . ?
O201 C201 Ru2 179.6(7) . . ?
O202 C202 Ru2 178.4(7) . . ?
O301 C301 Ru3 178.5(5) . . ?
O302 C302 Ru3 175.1(5) . . ?
O401 C401 Ru4 176.4(5) . . ?
O402 C402 Ru4 174.2(5) . . ?
O501 C501 Ru5 176.6(5) . . ?
O502 C502 Ru5 176.5(6) . . ?
O503 C503 Ru5 177.5(5) . . ?
C1 N1 Ru3 123.3(3) . . ?
C1 N1 Ru2 120.8(3) . . ?
Ru3 N1 Ru2 106.64(18) . . ?
C1 N1 Ru4 135.1(3) . . ?
Ru3 N1 Ru4 79.22(13) . . ?
Ru2 N1 Ru4 79.82(14) . . ?
C1 N1 Ru1 88.0(2) . . ?
Ru3 N1 Ru1 75.31(12) . . ?
Ru2 N1 Ru1 75.06(12) . . ?
Ru4 N1 Ru1 136.92(18) . . ?
C1 N2 C5 119.7(4) . . ?
C1 N2 Ru1 104.0(3) . . ?
C5 N2 Ru1 136.3(3) . . ?
C7 N3 Ru3 118.5(3) . . ?
C7 N3 Ru4 121.2(3) . . ?
Ru3 N3 Ru4 79.34(13) . . ?
C7 N3 Ru2 136.4(3) . . ?
Ru3 N3 Ru2 102.69(16) . . ?
Ru4 N3 Ru2 78.07(13) . . ?
C7 N4 C11 120.2(4) . . ?
C7 N4 Ru5 112.4(3) . . ?
C11 N4 Ru5 127.3(3) . . ?
C103 Ru1 C102 90.7(3) . . ?
C103 Ru1 C101 91.8(3) . . ?
C102 Ru1 C101 107.0(3) . . ?
C103 Ru1 N2 170.22(19) . . ?
C102 Ru1 N2 95.6(2) . . ?
C101 Ru1 N2 93.5(2) . . ?
C103 Ru1 N1 112.83(18) . . ?
C102 Ru1 N1 119.4(2) . . ?
C101 Ru1 N1 125.8(2) . . ?
N2 Ru1 N1 57.50(14) . . ?
C103 Ru1 Ru2 83.46(18) . . ?
C102 Ru1 Ru2 157.88(18) . . ?
C101 Ru1 Ru2 94.5(2) . . ?
N2 Ru1 Ru2 87.91(11) . . ?
N1 Ru1 Ru2 45.93(9) . . ?
C103 Ru1 Ru3 85.17(18) . . ?
C102 Ru1 Ru3 85.21(18) . . ?
C101 Ru1 Ru3 167.4(2) . . ?
N2 Ru1 Ru3 87.94(10) . . ?
N1 Ru1 Ru3 45.79(8) . . ?
Ru2 Ru1 Ru3 73.076(13) . . ?
C202 Ru2 C201 89.2(3) . . ?
C202 Ru2 C200 95.3(3) . . ?
C201 Ru2 C200 92.0(3) . . ?
C202 Ru2 N1 168.5(2) . . ?
C201 Ru2 N1 97.0(2) . . ?


C200 Ru2 N1 94.1(2) . . ?
C202 Ru2 N3 102.7(2) . . ?
C201 Ru2 N3 166.9(2) . . ?
C200 Ru2 N3 92.28(19) . . ?
N1 Ru2 N3 70.36(15) . . ?
C202 Ru2 Ru4 131.89(19) . . ?
C201 Ru2 Ru4 124.9(2) . . ?
C200 Ru2 Ru4 55.54(16) . . ?
N1 Ru2 Ru4 50.66(10) . . ?
N3 Ru2 Ru4 49.62(9) . . ?
C202 Ru2 Ru1 111.6(2) . . ?
C201 Ru2 Ru1 89.51(19) . . ?
C200 Ru2 Ru1 153.04(17) . . ?
N1 Ru2 Ru1 59.01(10) . . ?
N3 Ru2 Ru1 81.12(10) . . ?
Ru4 Ru2 Ru1 102.395(15) . . ?
C301 Ru3 C302 91.3(2) . . ?
C301 Ru3 N1 98.59(19) . . ?
C302 Ru3 N1 159.6(2) . . ?
C301 Ru3 N3 169.31(19) . . ?
C302 Ru3 N3 99.16(19) . . ?
N1 Ru3 N3 72.11(15) . . ?
C301 Ru3 Ru4 119.70(17) . . ?
C302 Ru3 Ru4 136.56(16) . . ?
N1 Ru3 Ru4 51.01(10) . . ?
N3 Ru3 Ru4 50.40(10) . . ?
C301 Ru3 Ru5 104.01(17) . . ?
C302 Ru3 Ru5 82.19(16) . . ?
N1 Ru3 Ru5 112.23(10) . . ?
N3 Ru3 Ru5 75.62(10) . . ?
Ru4 Ru3 Ru5 62.318(12) . . ?
C301 Ru3 Ru1 97.45(17) . . ?
C302 Ru3 Ru1 102.31(17) . . ?
N1 Ru3 Ru1 58.90(10) . . ?
N3 Ru3 Ru1 82.40(10) . . ?
Ru4 Ru3 Ru1 102.704(14) . . ?
Ru5 Ru3 Ru1 158.005(17) . . ?
C402 Ru4 C401 89.6(2) . . ?
C402 Ru4 N3 99.7(2) . . ?
C401 Ru4 N3 169.49(19) . . ?
C402 Ru4 N1 168.1(2) . . ?
C401 Ru4 N1 100.12(19) . . ?
N3 Ru4 N1 71.28(15) . . ?
C402 Ru4 C200 86.5(2) . . ?
C401 Ru4 C200 98.9(2) . . ?
N3 Ru4 C200 86.64(18) . . ?
N1 Ru4 C200 85.19(18) . . ?
C402 Ru4 Ru3 130.28(16) . . ?
C401 Ru4 Ru3 119.61(16) . . ?
N3 Ru4 Ru3 50.27(10) . . ?
N1 Ru4 Ru3 49.76(10) . . ?
C200 Ru4 Ru3 122.70(15) . . ?
C402 Ru4 Ru2 118.88(16) . . ?
C401 Ru4 Ru2 126.74(16) . . ?
N3 Ru4 Ru2 52.31(10) . . ?
N1 Ru4 Ru2 49.52(10) . . ?
C200 Ru4 Ru2 45.85(15) . . ?
Ru3 Ru4 Ru2 76.846(13) . . ?
C402 Ru4 Ru5 75.93(15) . . ?
C401 Ru4 Ru5 104.26(16) . . ?
N3 Ru4 Ru5 73.64(10) . . ?
N1 Ru4 Ru5 107.88(10) . . ?
C200 Ru4 Ru5 150.65(16) . . ?
Ru3 Ru4 Ru5 59.136(12) . . ?
Ru2 Ru4 Ru5 124.919(16) . . ?
C503 Ru5 C501 93.4(2) . . ?
C503 Ru5 C502 94.3(2) . . ?
C501 Ru5 C502 91.4(2) . . ?
C503 Ru5 N4 164.44(18) . . ?
C501 Ru5 N4 96.95(19) . . ?


C502 Ru5 N4 97.07(19) . . ?
C503 Ru5 Ru3 81.88(16) . . ?
C501 Ru5 Ru3 103.68(18) . . ?
C502 Ru5 Ru3 164.56(16) . . ?
N4 Ru5 Ru3 84.37(10) . . ?
C503 Ru5 Ru4 79.97(15) . . ?
C501 Ru5 Ru4 161.56(18) . . ?
C502 Ru5 Ru4 106.11(16) . . ?
N4 Ru5 Ru4 86.67(10) . . ?
Ru3 Ru5 Ru4 58.546(11) . . ?
 
loop_
 _geom_torsion_atom_site_label_1
 _geom_torsion_atom_site_label_2
 _geom_torsion_atom_site_label_3
 _geom_torsion_atom_site_label_4
 _geom_torsion
 _geom_torsion_site_symmetry_1
 _geom_torsion_site_symmetry_2
 _geom_torsion_site_symmetry_3
 _geom_torsion_site_symmetry_4
 _geom_torsion_publ_flag
N2 C1 C2 C3 -0.1(8) . . . . ?
N1 C1 C2 C3 179.3(5) . . . . ?
C1 C2 C3 C4 0.2(9) . . . . ?
C2 C3 C4 C5 -0.6(9) . . . . ?
C3 C4 C5 N2 0.8(8) . . . . ?
C3 C4 C5 C6 -178.4(6) . . . . ?
N4 C7 C8 C9 -1.2(8) . . . . ?
N3 C7 C8 C9 175.9(5) . . . . ?
C7 C8 C9 C10 -0.3(10) . . . . ?
C8 C9 C10 C11 1.3(11) . . . . ?
C9 C10 C11 N4 -0.7(9) . . . . ?
C9 C10 C11 C12 177.0(7) . . . . ?
N2 C1 N1 Ru3 69.2(4) . . . . ?
C2 C1 N1 Ru3 -110.2(5) . . . . ?
N2 C1 N1 Ru2 -73.0(4) . . . . ?
C2 C1 N1 Ru2 107.6(5) . . . . ?
N2 C1 N1 Ru4 179.2(3) . . . . ?
C2 C1 N1 Ru4 -0.3(7) . . . . ?
N2 C1 N1 Ru1 -1.7(3) . . . . ?
C2 C1 N1 Ru1 178.8(5) . . . . ?
C2 C1 N2 C5 0.4(7) . . . . ?
N1 C1 N2 C5 -179.1(4) . . . . ?
C2 C1 N2 Ru1 -178.5(4) . . . . ?
N1 C1 N2 Ru1 2.0(4) . . . . ?
C4 C5 N2 C1 -0.7(7) . . . . ?
C6 C5 N2 C1 178.5(5) . . . . ?
C4 C5 N2 Ru1 177.7(4) . . . . ?
C6 C5 N2 Ru1 -3.1(8) . . . . ?
N4 C7 N3 Ru3 43.3(5) . . . . ?
C8 C7 N3 Ru3 -133.9(4) . . . . ?
N4 C7 N3 Ru4 -51.4(5) . . . . ?
C8 C7 N3 Ru4 131.4(4) . . . . ?
N4 C7 N3 Ru2 -158.0(3) . . . . ?
C8 C7 N3 Ru2 24.8(7) . . . . ?
C8 C7 N4 C11 1.8(7) . . . . ?
N3 C7 N4 C11 -175.5(4) . . . . ?
C8 C7 N4 Ru5 -177.7(4) . . . . ?
N3 C7 N4 Ru5 5.1(5) . . . . ?
C10 C11 N4 C7 -0.8(8) . . . . ?
C12 C11 N4 C7 -178.5(5) . . . . ?
C10 C11 N4 Ru5 178.5(4) . . . . ?
C12 C11 N4 Ru5 0.9(8) . . . . ?
Ru3 N1 Ru1 C103 57.5(3) . . . . ?
Ru2 N1 Ru1 C103 -54.6(2) . . . . ?
Ru4 N1 Ru1 C103 1.8(4) . . . . ?
C1 N1 Ru1 C102 78.2(3) . . . . ?
Ru3 N1 Ru1 C102 -47.1(2) . . . . ?
Ru2 N1 Ru1 C102 -159.2(2) . . . . ?
Ru4 N1 Ru1 C102 -102.8(3) . . . . ?
C1 N1 Ru1 C101 -67.0(3) . . . . ?
Ru3 N1 Ru1 C101 167.8(2) . . . . ?
Ru2 N1 Ru1 C101 55.6(3) . . . . ?
Ru4 N1 Ru1 C101 112.0(3) . . . . ?
C1 N1 Ru1 N2 1.2(2) . . . . ?
Ru3 N1 Ru1 N2 -124.07(18) . . . . ?
Ru2 N1 Ru1 N2 123.82(17) . . . . ?
Ru4 N1 Ru1 N2 -179.8(3) . . . . ?
C1 N1 Ru1 Ru2 -122.7(3) . . . . ?
Ru3 N1 Ru1 Ru2 112.11(15) . . . . ?
Ru4 N1 Ru1 Ru2 56.4(2) . . . . ?
C1 N1 Ru1 Ru3 125.2(3) . . . . ?
Ru2 N1 Ru1 Ru3 -112.11(15) . . . . ?
Ru4 N1 Ru1 Ru3 -55.7(2) . . . . ?
O200 C200 Ru2 C202 -44.0(11) . . . . ?
Ru4 C200 Ru2 C202 138.6(2) . . . . ?
O200 C200 Ru2 C201 45.4(11) . . . . ?
Ru4 C200 Ru2 C201 -132.1(2) . . . . ?
O200 C200 Ru2 N1 142.6(10) . . . . ?
Ru4 C200 Ru2 N1 -34.91(17) . . . . ?
O200 C200 Ru2 N3 -147.0(10) . . . . ?
Ru4 C200 Ru2 N3 35.56(16) . . . . ?
O200 C200 Ru2 Ru4 177.5(11) . . . . ?
O200 C200 Ru2 Ru1 138.2(9) . . . . ?
Ru4 C200 Ru2 Ru1 -39.2(4) . . . . ?
C1 N1 Ru2 C202 115.5(11) . . . . ?
Ru3 N1 Ru2 C202 -32.2(11) . . . . ?
Ru4 N1 Ru2 C202 -107.6(11) . . . . ?
Ru1 N1 Ru2 C202 37.1(11) . . . . ?
C1 N1 Ru2 C201 -6.8(4) . . . . ?
Ru3 N1 Ru2 C201 -154.5(2) . . . . ?
Ru4 N1 Ru2 C201 130.1(2) . . . . ?
Ru1 N1 Ru2 C201 -85.2(2) . . . . ?
C1 N1 Ru2 C200 -99.3(4) . . . . ?
Ru3 N1 Ru2 C200 113.0(2) . . . . ?
Ru4 N1 Ru2 C200 37.59(19) . . . . ?
Ru1 N1 Ru2 C200 -177.72(18) . . . . ?
C1 N1 Ru2 N3 169.7(3) . . . . ?
Ru3 N1 Ru2 N3 22.05(15) . . . . ?
Ru4 N1 Ru2 N3 -53.36(12) . . . . ?
Ru1 N1 Ru2 N3 91.33(12) . . . . ?
C1 N1 Ru2 Ru4 -136.9(4) . . . . ?
Ru3 N1 Ru2 Ru4 75.41(14) . . . . ?
Ru1 N1 Ru2 Ru4 144.69(14) . . . . ?
C1 N1 Ru2 Ru1 78.4(3) . . . . ?
Ru3 N1 Ru2 Ru1 -69.28(13) . . . . ?
Ru4 N1 Ru2 Ru1 -144.69(14) . . . . ?
C7 N3 Ru2 C202 -11.9(5) . . . . ?
Ru3 N3 Ru2 C202 149.0(2) . . . . ?
Ru4 N3 Ru2 C202 -135.0(2) . . . . ?
C7 N3 Ru2 C201 -166.9(10) . . . . ?
Ru3 N3 Ru2 C201 -6.0(11) . . . . ?
Ru4 N3 Ru2 C201 70.0(10) . . . . ?
C7 N3 Ru2 C200 84.1(4) . . . . ?
Ru3 N3 Ru2 C200 -115.0(2) . . . . ?
Ru4 N3 Ru2 C200 -39.01(19) . . . . ?
C7 N3 Ru2 N1 177.6(4) . . . . ?
Ru3 N3 Ru2 N1 -21.48(14) . . . . ?
Ru4 N3 Ru2 N1 54.55(13) . . . . ?
C7 N3 Ru2 Ru4 123.1(4) . . . . ?
Ru3 N3 Ru2 Ru4 -76.03(13) . . . . ?
C7 N3 Ru2 Ru1 -122.2(4) . . . . ?
Ru3 N3 Ru2 Ru1 38.68(11) . . . . ?
Ru4 N3 Ru2 Ru1 114.71(9) . . . . ?
C103 Ru1 Ru2 C202 -41.7(3) . . . . ?
C102 Ru1 Ru2 C202 -117.2(5) . . . . ?
C101 Ru1 Ru2 C202 49.6(3) . . . . ?
N2 Ru1 Ru2 C202 142.9(2) . . . . ?
N1 Ru1 Ru2 C202 -172.6(2) . . . . ?
Ru3 Ru1 Ru2 C202 -128.6(2) . . . . ?
C103 Ru1 Ru2 C201 -130.6(3) . . . . ?
C102 Ru1 Ru2 C201 153.8(5) . . . . ?
C101 Ru1 Ru2 C201 -39.3(3) . . . . ?
N2 Ru1 Ru2 C201 54.0(2) . . . . ?
N1 Ru1 Ru2 C201 98.5(2) . . . . ?
Ru3 Ru1 Ru2 C201 142.4(2) . . . . ?
C103 Ru1 Ru2 C200 135.9(4) . . . . ?
C102 Ru1 Ru2 C200 60.4(6) . . . . ?
C101 Ru1 Ru2 C200 -132.8(4) . . . . ?
N2 Ru1 Ru2 C200 -39.5(4) . . . . ?
N1 Ru1 Ru2 C200 5.0(4) . . . . ?
Ru3 Ru1 Ru2 C200 49.0(4) . . . . ?
C103 Ru1 Ru2 N1 130.9(2) . . . . ?
C102 Ru1 Ru2 N1 55.4(5) . . . . ?
C101 Ru1 Ru2 N1 -137.8(2) . . . . ?
N2 Ru1 Ru2 N1 -44.52(16) . . . . ?
Ru3 Ru1 Ru2 N1 43.96(12) . . . . ?
C103 Ru1 Ru2 N3 58.5(2) . . . . ?
C102 Ru1 Ru2 N3 -17.0(5) . . . . ?
C101 Ru1 Ru2 N3 149.8(2) . . . . ?
N2 Ru1 Ru2 N3 -116.87(14) . . . . ?
N1 Ru1 Ru2 N3 -72.36(16) . . . . ?
Ru3 Ru1 Ru2 N3 -28.40(10) . . . . ?
C103 Ru1 Ru2 Ru4 103.64(19) . . . . ?
C102 Ru1 Ru2 Ru4 28.1(5) . . . . ?
C101 Ru1 Ru2 Ru4 -165.06(17) . . . . ?
N2 Ru1 Ru2 Ru4 -71.76(10) . . . . ?
N1 Ru1 Ru2 Ru4 -27.24(12) . . . . ?
Ru3 Ru1 Ru2 Ru4 16.721(14) . . . . ?
C1 N1 Ru3 C301 16.0(4) . . . . ?
Ru2 N1 Ru3 C301 162.7(2) . . . . ?
Ru4 N1 Ru3 C301 -121.50(19) . . . . ?
Ru1 N1 Ru3 C301 93.56(19) . . . . ?
C1 N1 Ru3 C302 -102.3(6) . . . . ?
Ru2 N1 Ru3 C302 44.4(6) . . . . ?
Ru4 N1 Ru3 C302 120.2(5) . . . . ?
Ru1 N1 Ru3 C302 -24.7(6) . . . . ?
C1 N1 Ru3 N3 -169.4(4) . . . . ?
Ru2 N1 Ru3 N3 -22.75(15) . . . . ?
Ru4 N1 Ru3 N3 53.09(12) . . . . ?
Ru1 N1 Ru3 N3 -91.85(13) . . . . ?
C1 N1 Ru3 Ru4 137.5(4) . . . . ?
Ru2 N1 Ru3 Ru4 -75.84(15) . . . . ?
Ru1 N1 Ru3 Ru4 -144.95(15) . . . . ?
C1 N1 Ru3 Ru5 125.0(3) . . . . ?
Ru2 N1 Ru3 Ru5 -88.30(14) . . . . ?
Ru4 N1 Ru3 Ru5 -12.46(13) . . . . ?
Ru1 N1 Ru3 Ru5 -157.41(3) . . . . ?
C1 N1 Ru3 Ru1 -77.6(3) . . . . ?
Ru2 N1 Ru3 Ru1 69.11(13) . . . . ?
Ru4 N1 Ru3 Ru1 144.95(15) . . . . ?
C7 N3 Ru3 C301 -143.4(10) . . . . ?
Ru4 N3 Ru3 C301 -23.6(11) . . . . ?
Ru2 N3 Ru3 C301 51.5(11) . . . . ?
C7 N3 Ru3 C302 25.4(4) . . . . ?
Ru4 N3 Ru3 C302 145.20(18) . . . . ?
Ru2 N3 Ru3 C302 -139.8(2) . . . . ?
C7 N3 Ru3 N1 -173.6(3) . . . . ?
Ru4 N3 Ru3 N1 -53.77(13) . . . . ?
Ru2 N3 Ru3 N1 21.27(14) . . . . ?
C7 N3 Ru3 Ru4 -119.8(3) . . . . ?
Ru2 N3 Ru3 Ru4 75.05(13) . . . . ?
C7 N3 Ru3 Ru5 -54.1(3) . . . . ?
Ru4 N3 Ru3 Ru5 65.77(7) . . . . ?
Ru2 N3 Ru3 Ru5 140.82(14) . . . . ?
C7 N3 Ru3 Ru1 126.7(3) . . . . ?
Ru4 N3 Ru3 Ru1 -113.48(9) . . . . ?
Ru2 N3 Ru3 Ru1 -38.43(11) . . . . ?
C103 Ru1 Ru3 C301 135.7(3) . . . . ?
C102 Ru1 Ru3 C301 44.6(2) . . . . ?
C101 Ru1 Ru3 C301 -147.9(8) . . . . ?
N2 Ru1 Ru3 C301 -51.22(19) . . . . ?
N1 Ru1 Ru3 C301 -95.6(2) . . . . ?
Ru2 Ru1 Ru3 C301 -139.66(16) . . . . ?
C103 Ru1 Ru3 C302 42.7(3) . . . . ?
C102 Ru1 Ru3 C302 -48.4(2) . . . . ?
C101 Ru1 Ru3 C302 119.1(8) . . . . ?
N2 Ru1 Ru3 C302 -144.22(19) . . . . ?
N1 Ru1 Ru3 C302 171.4(2) . . . . ?
Ru2 Ru1 Ru3 C302 127.33(16) . . . . ?
C103 Ru1 Ru3 N1 -128.7(2) . . . . ?
C102 Ru1 Ru3 N1 140.2(2) . . . . ?
C101 Ru1 Ru3 N1 -52.3(8) . . . . ?
N2 Ru1 Ru3 N1 44.35(17) . . . . ?
Ru2 Ru1 Ru3 N1 -44.09(13) . . . . ?
C103 Ru1 Ru3 N3 -55.1(2) . . . . ?
C102 Ru1 Ru3 N3 -146.2(2) . . . . ?
C101 Ru1 Ru3 N3 21.4(8) . . . . ?
N2 Ru1 Ru3 N3 118.00(15) . . . . ?
N1 Ru1 Ru3 N3 73.65(17) . . . . ?
Ru2 Ru1 Ru3 N3 29.56(10) . . . . ?
C103 Ru1 Ru3 Ru4 -101.48(19) . . . . ?
C102 Ru1 Ru3 Ru4 167.42(18) . . . . ?
C101 Ru1 Ru3 Ru4 -25.1(8) . . . . ?
N2 Ru1 Ru3 Ru4 71.58(11) . . . . ?
N1 Ru1 Ru3 Ru4 27.23(13) . . . . ?
Ru2 Ru1 Ru3 Ru4 -16.861(15) . . . . ?
C103 Ru1 Ru3 Ru5 -57.0(2) . . . . ?
C102 Ru1 Ru3 Ru5 -148.09(18) . . . . ?
C101 Ru1 Ru3 Ru5 19.4(8) . . . . ?
N2 Ru1 Ru3 Ru5 116.07(11) . . . . ?
N1 Ru1 Ru3 Ru5 71.72(13) . . . . ?
Ru2 Ru1 Ru3 Ru5 27.63(5) . . . . ?
C7 N3 Ru4 C402 -18.4(4) . . . . ?
Ru3 N3 Ru4 C402 -135.29(17) . . . . ?
Ru2 N3 Ru4 C402 119.15(17) . . . . ?
C7 N3 Ru4 C401 133.7(10) . . . . ?
Ru3 N3 Ru4 C401 16.7(11) . . . . ?
Ru2 N3 Ru4 C401 -88.8(10) . . . . ?
C7 N3 Ru4 N1 169.7(4) . . . . ?
Ru3 N3 Ru4 N1 52.75(12) . . . . ?
Ru2 N3 Ru4 N1 -52.81(12) . . . . ?
C7 N3 Ru4 C200 -104.3(3) . . . . ?
Ru3 N3 Ru4 C200 138.81(17) . . . . ?
Ru2 N3 Ru4 C200 33.24(17) . . . . ?
C7 N3 Ru4 Ru3 116.9(3) . . . . ?
Ru2 N3 Ru4 Ru3 -105.56(13) . . . . ?
C7 N3 Ru4 Ru2 -137.5(4) . . . . ?
Ru3 N3 Ru4 Ru2 105.56(13) . . . . ?
C7 N3 Ru4 Ru5 53.8(3) . . . . ?
Ru3 N3 Ru4 Ru5 -63.18(7) . . . . ?
Ru2 N3 Ru4 Ru5 -168.74(11) . . . . ?
C1 N1 Ru4 C402 137.9(9) . . . . ?
Ru3 N1 Ru4 C402 -95.3(9) . . . . ?
Ru2 N1 Ru4 C402 14.0(9) . . . . ?
Ru1 N1 Ru4 C402 -40.8(10) . . . . ?
C1 N1 Ru4 C401 -6.5(4) . . . . ?
Ru3 N1 Ru4 C401 120.43(18) . . . . ?
Ru2 N1 Ru4 C401 -130.28(18) . . . . ?
Ru1 N1 Ru4 C401 174.9(3) . . . . ?
C1 N1 Ru4 N3 179.8(4) . . . . ?
Ru3 N1 Ru4 N3 -53.31(12) . . . . ?
Ru2 N1 Ru4 N3 55.97(13) . . . . ?
Ru1 N1 Ru4 N3 1.1(2) . . . . ?
C1 N1 Ru4 C200 91.7(4) . . . . ?
Ru3 N1 Ru4 C200 -141.39(19) . . . . ?
Ru2 N1 Ru4 C200 -32.10(18) . . . . ?
Ru1 N1 Ru4 C200 -87.0(3) . . . . ?
C1 N1 Ru4 Ru3 -126.9(4) . . . . ?
Ru2 N1 Ru4 Ru3 109.29(15) . . . . ?
Ru1 N1 Ru4 Ru3 54.43(19) . . . . ?
C1 N1 Ru4 Ru2 123.8(4) . . . . ?
Ru3 N1 Ru4 Ru2 -109.29(15) . . . . ?
Ru1 N1 Ru4 Ru2 -54.9(2) . . . . ?
C1 N1 Ru4 Ru5 -115.2(4) . . . . ?
Ru3 N1 Ru4 Ru5 11.74(12) . . . . ?
Ru2 N1 Ru4 Ru5 121.02(7) . . . . ?
Ru1 N1 Ru4 Ru5 66.2(2) . . . . ?
O200 C200 Ru4 C402 44.6(7) . . . . ?
Ru2 C200 Ru4 C402 -137.1(2) . . . . ?
O200 C200 Ru4 C401 -44.4(7) . . . . ?
Ru2 C200 Ru4 C401 133.8(2) . . . . ?
O200 C200 Ru4 N3 144.6(7) . . . . ?
Ru2 C200 Ru4 N3 -37.20(18) . . . . ?
O200 C200 Ru4 N1 -144.0(7) . . . . ?
Ru2 C200 Ru4 N1 34.28(17) . . . . ?
O200 C200 Ru4 Ru3 -178.4(6) . . . . ?
Ru2 C200 Ru4 Ru3 -0.2(2) . . . . ?
O200 C200 Ru4 Ru2 -178.2(8) . . . . ?
O200 C200 Ru4 Ru5 97.4(7) . . . . ?
Ru2 C200 Ru4 Ru5 -84.3(3) . . . . ?
C301 Ru3 Ru4 C402 -119.5(3) . . . . ?
C302 Ru3 Ru4 C402 10.3(3) . . . . ?
N1 Ru3 Ru4 C402 164.4(3) . . . . ?
N3 Ru3 Ru4 C402 65.4(2) . . . . ?
Ru5 Ru3 Ru4 C402 -28.7(2) . . . . ?
Ru1 Ru3 Ru4 C402 134.1(2) . . . . ?
C301 Ru3 Ru4 C401 -1.4(3) . . . . ?
C302 Ru3 Ru4 C401 128.4(3) . . . . ?
N1 Ru3 Ru4 C401 -77.5(2) . . . . ?
N3 Ru3 Ru4 C401 -176.5(2) . . . . ?
Ru5 Ru3 Ru4 C401 89.45(18) . . . . ?
Ru1 Ru3 Ru4 C401 -107.79(18) . . . . ?
C301 Ru3 Ru4 N3 175.1(2) . . . . ?
C302 Ru3 Ru4 N3 -55.0(3) . . . . ?
N1 Ru3 Ru4 N3 99.02(19) . . . . ?
Ru5 Ru3 Ru4 N3 -94.02(13) . . . . ?
Ru1 Ru3 Ru4 N3 68.74(13) . . . . ?
C301 Ru3 Ru4 N1 76.1(2) . . . . ?
C302 Ru3 Ru4 N1 -154.0(3) . . . . ?
N3 Ru3 Ru4 N1 -99.02(19) . . . . ?
Ru5 Ru3 Ru4 N1 166.96(14) . . . . ?
Ru1 Ru3 Ru4 N1 -30.28(14) . . . . ?
C301 Ru3 Ru4 C200 123.7(3) . . . . ?
C302 Ru3 Ru4 C200 -106.4(3) . . . . ?
N1 Ru3 Ru4 C200 47.6(2) . . . . ?
N3 Ru3 Ru4 C200 -51.4(2) . . . . ?
Ru5 Ru3 Ru4 C200 -145.39(18) . . . . ?
Ru1 Ru3 Ru4 C200 17.37(18) . . . . ?
C301 Ru3 Ru4 Ru2 123.58(19) . . . . ?
C302 Ru3 Ru4 Ru2 -106.5(2) . . . . ?
N1 Ru3 Ru4 Ru2 47.50(14) . . . . ?
N3 Ru3 Ru4 Ru2 -51.52(13) . . . . ?
Ru5 Ru3 Ru4 Ru2 -145.536(16) . . . . ?
Ru1 Ru3 Ru4 Ru2 17.224(15) . . . . ?
C301 Ru3 Ru4 Ru5 -90.88(19) . . . . ?
C302 Ru3 Ru4 Ru5 39.0(2) . . . . ?
N1 Ru3 Ru4 Ru5 -166.96(14) . . . . ?
N3 Ru3 Ru4 Ru5 94.02(13) . . . . ?
Ru1 Ru3 Ru4 Ru5 162.760(17) . . . . ?
C202 Ru2 Ru4 C402 -11.5(3) . . . . ?
C201 Ru2 Ru4 C402 115.6(3) . . . . ?
C200 Ru2 Ru4 C402 50.8(3) . . . . ?
N1 Ru2 Ru4 C402 -176.7(2) . . . . ?
N3 Ru2 Ru4 C402 -79.5(2) . . . . ?
Ru1 Ru2 Ru4 C402 -146.24(19) . . . . ?
C202 Ru2 Ru4 C401 -125.2(3) . . . . ?
C201 Ru2 Ru4 C401 1.9(3) . . . . ?
C200 Ru2 Ru4 C401 -62.9(3) . . . . ?
N1 Ru2 Ru4 C401 69.6(2) . . . . ?
N3 Ru2 Ru4 C401 166.8(2) . . . . ?
Ru1 Ru2 Ru4 C401 100.1(2) . . . . ?
C202 Ru2 Ru4 N3 68.0(3) . . . . ?
C201 Ru2 Ru4 N3 -165.0(3) . . . . ?
C200 Ru2 Ru4 N3 130.3(3) . . . . ?
N1 Ru2 Ru4 N3 -97.26(19) . . . . ?
Ru1 Ru2 Ru4 N3 -66.78(13) . . . . ?
C202 Ru2 Ru4 N1 165.3(3) . . . . ?
C201 Ru2 Ru4 N1 -67.7(3) . . . . ?
C200 Ru2 Ru4 N1 -132.4(3) . . . . ?
N3 Ru2 Ru4 N1 97.26(19) . . . . ?
Ru1 Ru2 Ru4 N1 30.48(13) . . . . ?
C202 Ru2 Ru4 C200 -62.3(3) . . . . ?
C201 Ru2 Ru4 C200 64.7(3) . . . . ?
N1 Ru2 Ru4 C200 132.4(3) . . . . ?
N3 Ru2 Ru4 C200 -130.3(3) . . . . ?
Ru1 Ru2 Ru4 C200 162.9(2) . . . . ?
C202 Ru2 Ru4 Ru3 117.5(3) . . . . ?
C201 Ru2 Ru4 Ru3 -115.4(2) . . . . ?
C200 Ru2 Ru4 Ru3 179.8(2) . . . . ?
N1 Ru2 Ru4 Ru3 -47.73(13) . . . . ?
N3 Ru2 Ru4 Ru3 49.53(13) . . . . ?
Ru1 Ru2 Ru4 Ru3 -17.243(15) . . . . ?
C202 Ru2 Ru4 Ru5 81.2(3) . . . . ?
C201 Ru2 Ru4 Ru5 -151.8(2) . . . . ?
C200 Ru2 Ru4 Ru5 143.5(2) . . . . ?
N1 Ru2 Ru4 Ru5 -84.06(13) . . . . ?
N3 Ru2 Ru4 Ru5 13.20(13) . . . . ?
Ru1 Ru2 Ru4 Ru5 -53.57(2) . . . . ?
C7 N4 Ru5 C503 -6.1(9) . . . . ?
C11 N4 Ru5 C503 174.5(7) . . . . ?
C7 N4 Ru5 C501 -137.2(3) . . . . ?
C11 N4 Ru5 C501 43.4(4) . . . . ?
C7 N4 Ru5 C502 130.5(3) . . . . ?
C11 N4 Ru5 C502 -48.9(4) . . . . ?
C7 N4 Ru5 Ru3 -34.0(3) . . . . ?
C11 N4 Ru5 Ru3 146.6(4) . . . . ?
C7 N4 Ru5 Ru4 24.7(3) . . . . ?
C11 N4 Ru5 Ru4 -154.7(4) . . . . ?
C301 Ru3 Ru5 C503 33.3(2) . . . . ?
C302 Ru3 Ru5 C503 122.7(2) . . . . ?
N1 Ru3 Ru5 C503 -72.2(2) . . . . ?
N3 Ru3 Ru5 C503 -135.67(19) . . . . ?
Ru4 Ru3 Ru5 C503 -83.16(16) . . . . ?
Ru1 Ru3 Ru5 C503 -133.69(17) . . . . ?
C301 Ru3 Ru5 C501 -58.2(2) . . . . ?
C302 Ru3 Ru5 C501 31.2(2) . . . . ?
N1 Ru3 Ru5 C501 -163.7(2) . . . . ?
N3 Ru3 Ru5 C501 132.8(2) . . . . ?
Ru4 Ru3 Ru5 C501 -174.66(17) . . . . ?
Ru1 Ru3 Ru5 C501 134.81(18) . . . . ?
C301 Ru3 Ru5 C502 109.8(6) . . . . ?
C302 Ru3 Ru5 C502 -160.7(6) . . . . ?
N1 Ru3 Ru5 C502 4.3(6) . . . . ?
N3 Ru3 Ru5 C502 -59.1(6) . . . . ?
Ru4 Ru3 Ru5 C502 -6.6(6) . . . . ?
Ru1 Ru3 Ru5 C502 -57.2(6) . . . . ?
C301 Ru3 Ru5 N4 -153.99(19) . . . . ?
C302 Ru3 Ru5 N4 -64.57(19) . . . . ?
N1 Ru3 Ru5 N4 100.45(15) . . . . ?
N3 Ru3 Ru5 N4 37.03(15) . . . . ?
Ru4 Ru3 Ru5 N4 89.54(10) . . . . ?
Ru1 Ru3 Ru5 N4 39.01(11) . . . . ?
C301 Ru3 Ru5 Ru4 116.48(16) . . . . ?
C302 Ru3 Ru5 Ru4 -154.11(16) . . . . ?
N1 Ru3 Ru5 Ru4 10.92(12) . . . . ?
N3 Ru3 Ru5 Ru4 -52.51(11) . . . . ?
Ru1 Ru3 Ru5 Ru4 -50.53(4) . . . . ?
C402 Ru4 Ru5 C503 -115.6(2) . . . . ?
C401 Ru4 Ru5 C503 -29.7(2) . . . . ?
N3 Ru4 Ru5 C503 139.6(2) . . . . ?
N1 Ru4 Ru5 C503 76.1(2) . . . . ?
C200 Ru4 Ru5 C503 -170.7(3) . . . . ?
Ru3 Ru4 Ru5 C503 86.57(17) . . . . ?
Ru2 Ru4 Ru5 C503 128.79(17) . . . . ?
C402 Ru4 Ru5 C501 174.4(6) . . . . ?
C401 Ru4 Ru5 C501 -99.6(6) . . . . ?
N3 Ru4 Ru5 C501 69.7(5) . . . . ?
N1 Ru4 Ru5 C501 6.2(5) . . . . ?
C200 Ru4 Ru5 C501 119.4(6) . . . . ?
Ru3 Ru4 Ru5 C501 16.6(5) . . . . ?
Ru2 Ru4 Ru5 C501 58.8(5) . . . . ?
C402 Ru4 Ru5 C502 -24.0(2) . . . . ?
C401 Ru4 Ru5 C502 61.9(2) . . . . ?
N3 Ru4 Ru5 C502 -128.8(2) . . . . ?
N1 Ru4 Ru5 C502 167.7(2) . . . . ?
C200 Ru4 Ru5 C502 -79.1(3) . . . . ?
Ru3 Ru4 Ru5 C502 178.16(17) . . . . ?
Ru2 Ru4 Ru5 C502 -139.61(17) . . . . ?
C402 Ru4 Ru5 N4 72.4(2) . . . . ?
C401 Ru4 Ru5 N4 158.33(19) . . . . ?
N3 Ru4 Ru5 N4 -32.35(15) . . . . ?
N1 Ru4 Ru5 N4 -95.85(15) . . . . ?
C200 Ru4 Ru5 N4 17.3(3) . . . . ?
Ru3 Ru4 Ru5 N4 -85.43(10) . . . . ?
Ru2 Ru4 Ru5 N4 -43.21(10) . . . . ?
C402 Ru4 Ru5 Ru3 157.84(17) . . . . ?
C401 Ru4 Ru5 Ru3 -116.23(16) . . . . ?
N3 Ru4 Ru5 Ru3 53.08(11) . . . . ?
N1 Ru4 Ru5 Ru3 -10.42(11) . . . . ?
C200 Ru4 Ru5 Ru3 102.8(3) . . . . ?
Ru2 Ru4 Ru5 Ru3 42.224(18) . . . . ?
 
_diffrn_measured_fraction_theta_max    0.967
_diffrn_reflns_theta_full              68.06
_diffrn_measured_fraction_theta_full   0.967
_refine_diff_density_max    0.868
_refine_diff_density_min   -1.166
_refine_diff_density_rms    0.174

#===END

data_4_(pg106b)
 
_audit_creation_method            SHELXL-97
_chemical_name_systematic
;
 ?
;
_chemical_name_common             ?
_chemical_melting_point           ?
_chemical_formula_moiety          
'C33 H16 N4 O22 Ru9, C H2 Cl2'
_chemical_formula_sum
 'C34 H18 Cl2 N4 O22 Ru9'
_chemical_formula_weight          1815.06
_chemical_compound_source
;
Synthesis. Crystallization from a CH~2~Cl~2~ /
 hexanes solution 
at room temperature by slow liquid-liquid difussion.
;
 
loop_
 _atom_type_symbol
 _atom_type_description
 _atom_type_scat_dispersion_real
 _atom_type_scat_dispersion_imag
 _atom_type_scat_source
 'C'  'C'   0.0181   0.0091
 'International Tables Vol C Tables 4.2.6.8 and 6.1.1.4'
 'H'  'H'   0.0000   0.0000
 'International Tables Vol C Tables 4.2.6.8 and 6.1.1.4'
 'N'  'N'   0.0311   0.0180
 'International Tables Vol C Tables 4.2.6.8 and 6.1.1.4'
 'O'  'O'   0.0492   0.0322
 'International Tables Vol C Tables 4.2.6.8 and 6.1.1.4'
 'Cl'  'Cl'   0.3639   0.7018
 'International Tables Vol C Tables 4.2.6.8 and 6.1.1.4'
 'Ru'  'Ru'   0.0552   3.2960
 'International Tables Vol C Tables 4.2.6.8 and 6.1.1.4'
 
_symmetry_cell_setting            'triclinic'
_symmetry_space_group_name_H-M    'P -1'
_symmetry_space_group_name_Hall    '-P 1'
 
loop_
 _symmetry_equiv_pos_as_xyz
 'x, y, z'
 '-x, -y, -z'
 
_cell_length_a                    10.3849(2)
_cell_length_b                    11.01080(10)
_cell_length_c                    21.9664(3)
_cell_angle_alpha                 86.5770(10)
_cell_angle_beta                  87.1220(10)
_cell_angle_gamma                 85.8630(10)
_cell_volume                      2498.10(6)
_cell_formula_units_Z             2
_cell_measurement_temperature     150(2)
_cell_measurement_reflns_used     7654
_cell_measurement_theta_min       ?
_cell_measurement_theta_max       ?
 
_exptl_crystal_description        'blocks'
_exptl_crystal_colour             'black'
_exptl_crystal_size_max           0.075
_exptl_crystal_size_mid           0.050
_exptl_crystal_size_min           0.025
_exptl_crystal_density_meas       ?
_exptl_crystal_density_diffrn     2.413
_exptl_crystal_density_method     'not measured'
_exptl_crystal_F_000              1712
_exptl_absorpt_correction_type       refdelf
_exptl_absorpt_coefficient_mu        23.092
_exptl_absorpt_process_details
;
Parkin S,Moezzi B & Hope H, (1995) J. Appl. Cryst. 28, 53-56
Cubic fit to sin(theta)/lambda - 24 parameters
;
_exptl_absorpt_correction_T_min      0.280
_exptl_absorpt_correction_T_max      0.560
 
_exptl_special_details
;
 ?
;
 
_diffrn_ambient_temperature       150(2)
_diffrn_radiation_wavelength      1.54180
_diffrn_radiation_type            CuK\a
_diffrn_radiation_source          'fine-focus sealed tube'
_diffrn_measurement_device_type  'KappaCCD'
_diffrn_measurement_device  '95mm CCD camera on \k-goniostat'
_diffrn_detector_area_resol_mean    9
_diffrn_radiation_monochromator        'horizontally mounted graphite crystal'
_diffrn_measurement_method       'CCD'
_diffrn_standards_number          ?
_diffrn_standards_interval_count  ?
_diffrn_standards_interval_time   ?
_diffrn_standards_decay_%         ?
_diffrn_reflns_number             16875
_diffrn_reflns_av_R_equivalents   0.0000
_diffrn_reflns_av_sigmaI/netI     0.0716
_diffrn_reflns_limit_h_min        0
_diffrn_reflns_limit_h_max        12
_diffrn_reflns_limit_k_min        -13
_diffrn_reflns_limit_k_max        13
_diffrn_reflns_limit_l_min        -26
_diffrn_reflns_limit_l_max        26
_diffrn_reflns_theta_min          4.03
_diffrn_reflns_theta_max          70.10
_reflns_number_total              9221
_reflns_number_gt                 8284
_reflns_threshold_expression      >2sigma(I)
 
_computing_data_collection        'Collect (Nonius BV, 1997-2000)'
_computing_cell_refinement 
'HKL Scalepack (Otwinowski & Minor 1997)'
_computing_data_reduction 
'HKL Denzo and Scalepack (Otwinowski & Minor 1997)'
_computing_structure_solution     'DIRDIF-96 (Beurskens et al., 1996)'
_computing_structure_refinement   'SHELXL-97 (Sheldrick, 1997)'
_computing_molecular_graphics     'EUCLID (Spek, 1982)'
_computing_publication_material   'SHELXL-97 (Sheldrick, 1997)'
 
_refine_special_details
;
 Refinement of F^2^ against ALL reflections.  The weighted R-factor wR and
 goodness of fit S are based on F^2^, conventional R-factors R are based
 on F, with F set to zero for negative F^2^. The threshold expression of
 F^2^ > 2sigma(F^2^) is used only for calculating R-factors(gt) etc. and is
 not relevant to the choice of reflections for refinement.  R-factors based
 on F^2^ are statistically about twice as large as those based on F, and R-
 factors based on ALL data will be even larger.
;
 
_refine_ls_structure_factor_coef  Fsqd
_refine_ls_matrix_type            full
_refine_ls_weighting_scheme       calc
_refine_ls_weighting_details
 'calc w=1/[\s^2^(Fo^2^)+(0.0185P)^2^+5.3009P] where P=(Fo^2^+2Fc^2^)/3'
_atom_sites_solution_primary      direct
_atom_sites_solution_secondary    difmap
_atom_sites_solution_hydrogens    geom
_refine_ls_hydrogen_treatment     mixed
_refine_ls_extinction_method      SHELXL
_refine_ls_extinction_coef        0.00114(5)
_refine_ls_extinction_expression
 'Fc^*^=kFc[1+0.001xFc^2^\l^3^/sin(2\q)]^-1/4^'
_refine_ls_number_reflns          9221
_refine_ls_number_parameters      656
_refine_ls_number_restraints      1
_refine_ls_R_factor_all           0.0432
_refine_ls_R_factor_gt            0.0385
_refine_ls_wR_factor_ref          0.0921
_refine_ls_wR_factor_gt           0.0894
_refine_ls_goodness_of_fit_ref    1.036
_refine_ls_restrained_S_all       1.036
_refine_ls_shift/su_max           0.002
_refine_ls_shift/su_mean          0.000
 
loop_
 _atom_site_label
 _atom_site_type_symbol
 _atom_site_fract_x
 _atom_site_fract_y
 _atom_site_fract_z
 _atom_site_U_iso_or_equiv
 _atom_site_adp_type
 _atom_site_occupancy
 _atom_site_symmetry_multiplicity
 _atom_site_calc_flag
 _atom_site_refinement_flags
 _atom_site_disorder_assembly
 _atom_site_disorder_group
C1 C 0.6020(6) 0.8601(5) 0.8793(2) 0.0364(13) Uani 1 1 d . . .
C2 C 0.4828(7) 0.9282(6) 0.8796(3) 0.0532(17) Uani 1 1 d . . .
H2 H 0.4121 0.9011 0.8613 0.064 Uiso 1 1 calc R . .
C3 C 0.4740(10) 1.0384(7) 0.9084(4) 0.072(3) Uani 1 1 d . . .
H3A H 0.3965 1.0863 0.9088 0.087 Uiso 1 1 calc R . .
C4 C 0.5768(11) 1.0762(6) 0.9358(3) 0.072(3) Uani 1 1 d . . .
H4 H 0.5704 1.1506 0.9541 0.087 Uiso 1 1 calc R . .
C5 C 0.6883(9) 1.0056(6) 0.9365(3) 0.059(2) Uani 1 1 d . . .
C6 C 0.8030(12) 1.0488(7) 0.9664(4) 0.090(3) Uani 1 1 d . . .
H6A H 0.8744 0.9887 0.9632 0.135 Uiso 1 1 calc R . .
H6B H 0.7809 1.0608 1.0087 0.135 Uiso 1 1 calc R . .
H6C H 0.8267 1.1244 0.9464 0.135 Uiso 1 1 calc R . .
C10 C 0.0910(12) 0.2102(12) 0.7967(8) 0.127(5) Uani 1 1 d . . .
H10A H 0.0064 0.1962 0.7828 0.153 Uiso 1 1 calc R . .
H10B H 0.0985 0.1693 0.8368 0.153 Uiso 1 1 calc R . .
C11 C 0.9117(5) 0.7051(5) 0.5943(2) 0.0355(12) Uani 1 1 d . . .
C12 C 1.0438(6) 0.6761(7) 0.5910(3) 0.0538(17) Uani 1 1 d . . .
H12 H 1.0858 0.6408 0.6247 0.065 Uiso 1 1 calc R . .
C13 C 1.1119(7) 0.7008(9) 0.5363(4) 0.072(2) Uani 1 1 d . . .
H13 H 1.2010 0.6848 0.5329 0.086 Uiso 1 1 calc R . .
C14 C 1.0449(8) 0.7493(9) 0.4875(3) 0.071(2) Uani 1 1 d . . .
H14 H 1.0892 0.7644 0.4503 0.086 Uiso 1 1 calc R . .
C15 C 0.9142(7) 0.7762(7) 0.4923(3) 0.0516(16) Uani 1 1 d . . .
C16 C 0.8442(9) 0.8279(10) 0.4375(3) 0.076(2) Uani 1 1 d . . .
H16A H 0.7538 0.8416 0.4483 0.114 Uiso 1 1 calc R . .
H16B H 0.8553 0.7714 0.4057 0.114 Uiso 1 1 calc R . .
H16C H 0.8786 0.9036 0.4233 0.114 Uiso 1 1 calc R . .
C101 C 0.6031(7) 0.6256(5) 0.9664(3) 0.0481(16) Uani 1 1 d . . .
C102 C 0.7647(6) 0.4479(5) 0.9308(3) 0.0403(13) Uani 1 1 d . . .
C201 C 0.8524(6) 0.8968(5) 0.7925(3) 0.0395(13) Uani 1 1 d . . .
C202 C 0.9847(6) 0.6901(5) 0.7751(3) 0.0379(13) Uani 1 1 d . . .
C301 C 1.0098(8) 0.8574(7) 0.9047(3) 0.0609(19) Uani 1 1 d . . .
C302 C 0.8521(9) 0.7539(7) 1.0044(3) 0.062(2) Uani 1 1 d . . .
C303 C 0.9793(7) 0.6150(6) 0.9188(3) 0.0468(15) Uani 1 1 d . . .
C401 C 0.3803(6) 0.6351(7) 0.8633(3) 0.0542(17) Uani 1 1 d . . .
C402 C 0.3851(6) 0.7851(6) 0.7652(3) 0.0471(15) Uani 1 1 d . . .
C501 C 0.4518(7) 0.3476(7) 0.7864(4) 0.0568(18) Uani 1 1 d . . .
C502 C 0.5866(8) 0.3220(7) 0.6733(3) 0.0581(19) Uani 1 1 d . . .
C503 C 0.3257(8) 0.4304(7) 0.6818(4) 0.064(2) Uani 1 1 d . . .
C601 C 0.6172(6) 0.9625(5) 0.7163(3) 0.0411(13) Uani 1 1 d . . .
C602 C 0.8324(6) 0.9598(6) 0.6524(3) 0.0423(14) Uani 1 1 d . . .
C701 C 0.6814(8) 0.5275(6) 0.5779(3) 0.0538(17) Uani 1 1 d . . .
C702 C 0.4763(7) 0.6172(6) 0.6333(3) 0.0524(16) Uani 1 1 d . . .
C801 C 0.7380(6) 0.3421(5) 0.8056(3) 0.0402(13) Uani 1 1 d . . .
C802 C 0.8336(6) 0.4397(5) 0.7086(3) 0.0403(13) Uani 1 1 d . . .
C901 C 0.5738(7) 0.7562(7) 0.5017(3) 0.0579(18) Uani 1 1 d . . .
C902 C 0.6731(7) 0.9785(7) 0.5396(3) 0.0558(17) Uani 1 1 d . . .
C903 C 0.4857(7) 0.8848(7) 0.6046(3) 0.0571(18) Uani 1 1 d . . .
N1 N 0.6277(4) 0.7563(4) 0.8469(2) 0.0310(9) Uani 1 1 d . . .
N2 N 0.7021(6) 0.8964(4) 0.9099(2) 0.0442(13) Uani 1 1 d . . .
N3 N 0.8358(4) 0.6858(4) 0.64819(19) 0.0298(9) Uani 1 1 d D . .
N4 N 0.8469(5) 0.7568(5) 0.5464(2) 0.0390(11) Uani 1 1 d . . .
O10 O 0.6556(3) 0.6797(3) 0.73435(14) 0.0256(7) Uani 1 1 d . . .
O101 O 0.5486(7) 0.6438(5) 1.0121(2) 0.0840(19) Uani 1 1 d . . .
O102 O 0.8078(6) 0.3617(4) 0.9553(2) 0.0656(14) Uani 1 1 d . . .
O201 O 0.8828(6) 0.9960(4) 0.7920(2) 0.0626(13) Uani 1 1 d . . .
O202 O 1.0916(5) 0.6634(5) 0.7622(3) 0.0689(14) Uani 1 1 d . . .
O301 O 1.0997(7) 0.9086(7) 0.8954(3) 0.099(2) Uani 1 1 d . . .
O302 O 0.8409(9) 0.7524(6) 1.0554(2) 0.109(3) Uani 1 1 d . . .
O303 O 1.0492(5) 0.5307(5) 0.9207(3) 0.0697(15) Uani 1 1 d . . .
O401 O 0.3074(6) 0.6213(7) 0.9035(3) 0.097(2) Uani 1 1 d . . .
O402 O 0.3101(5) 0.8518(5) 0.7448(3) 0.0770(16) Uani 1 1 d . . .
O501 O 0.4297(6) 0.2881(6) 0.8283(3) 0.091(2) Uani 1 1 d . . .
O502 O 0.6409(7) 0.2474(5) 0.6482(3) 0.0841(19) Uani 1 1 d . . .
O503 O 0.2322(6) 0.4188(6) 0.6612(4) 0.099(2) Uani 1 1 d . . .
O601 O 0.5492(5) 1.0390(4) 0.7350(3) 0.0696(15) Uani 1 1 d . . .
O602 O 0.8978(6) 1.0326(5) 0.6336(3) 0.0767(16) Uani 1 1 d . . .
O701 O 0.6980(8) 0.4785(6) 0.5329(3) 0.098(2) Uani 1 1 d . . .
O702 O 0.3784(5) 0.6444(6) 0.6129(3) 0.0833(19) Uani 1 1 d . . .
O801 O 0.7526(5) 0.2463(4) 0.8271(2) 0.0626(13) Uani 1 1 d . . .
O802 O 0.9089(5) 0.3916(5) 0.6768(2) 0.0624(13) Uani 1 1 d . . .
O901 O 0.5269(7) 0.7190(7) 0.4633(3) 0.097(2) Uani 1 1 d . . .
O902 O 0.6887(7) 1.0753(6) 0.5213(3) 0.0895(19) Uani 1 1 d . . .
O903 O 0.3897(5) 0.9296(7) 0.6208(3) 0.0871(19) Uani 1 1 d . . .
Cl1 Cl 0.0966(3) 0.3489(3) 0.80342(12) 0.0973(8) Uani 1 1 d . . .
Cl2 Cl 0.2149(6) 0.1363(3) 0.7440(3) 0.191(2) Uani 1 1 d . . .
Ru1 Ru 0.69277(4) 0.59505(3) 0.893202(17) 0.02865(12) Uani 1 1 d . . .
Ru2 Ru 0.81418(4) 0.73331(3) 0.799259(16) 0.02473(11) Uani 1 1 d . . .
Ru3 Ru 0.86515(5) 0.75687(4) 0.917152(18) 0.03642(13) Uani 1 1 d . . .
Ru4 Ru 0.50078(4) 0.66129(4) 0.799293(19) 0.03104(12) Uani 1 1 d . . .
Ru5 Ru 0.49200(4) 0.44957(4) 0.71642(2) 0.03962(13) Uani 1 1 d . . .
Ru6 Ru 0.73236(4) 0.83934(3) 0.685715(17) 0.02725(11) Uani 1 1 d . . .
Ru7 Ru 0.65356(4) 0.60838(4) 0.648544(18) 0.03106(12) Uani 1 1 d . . .
Ru8 Ru 0.71420(4) 0.49855(3) 0.768523(17) 0.02572(11) Uani 1 1 d . . .
Ru9 Ru 0.64649(4) 0.81889(4) 0.572485(19) 0.03649(13) Uani 1 1 d . . .
H3 H 0.877(6) 0.644(6) 0.675(3) 0.050(19) Uiso 1 1 d D . .
H100 H 0.816(6) 0.565(5) 0.823(3) 0.035(15) Uiso 1 1 d . . .
H200 H 0.603(6) 0.523(5) 0.829(3) 0.040 Uiso 1 1 d . . .
H300 H 0.405(7) 0.576(6) 0.751(3) 0.054(19) Uiso 1 1 d . . .
 
loop_
 _atom_site_aniso_label
 _atom_site_aniso_U_11
 _atom_site_aniso_U_22
 _atom_site_aniso_U_33
 _atom_site_aniso_U_23
 _atom_site_aniso_U_13
 _atom_site_aniso_U_12
C1 0.055(4) 0.028(3) 0.025(3) -0.003(2) 0.012(2) 0.001(2)
C2 0.063(4) 0.041(3) 0.050(4) -0.002(3) 0.017(3) 0.015(3)
C3 0.106(7) 0.043(4) 0.056(4) 0.004(3) 0.041(5) 0.037(4)
C4 0.138(9) 0.033(4) 0.042(4) -0.014(3) 0.014(5) 0.011(5)
C5 0.114(7) 0.030(3) 0.029(3) -0.006(3) 0.005(3) 0.006(4)
C6 0.165(10) 0.039(4) 0.071(5) -0.025(4) -0.037(6) -0.005(5)
C10 0.081(8) 0.120(10) 0.176(13) 0.023(9) 0.020(8) -0.024(7)
C11 0.031(3) 0.045(3) 0.030(3) -0.008(2) 0.001(2) 0.007(2)
C12 0.037(3) 0.083(5) 0.037(3) -0.001(3) 0.003(3) 0.016(3)
C13 0.041(4) 0.113(7) 0.056(4) -0.005(4) 0.011(3) 0.024(4)
C14 0.051(4) 0.116(7) 0.042(4) -0.006(4) 0.017(3) 0.009(4)
C15 0.048(4) 0.073(4) 0.032(3) -0.002(3) 0.002(3) -0.002(3)
C16 0.068(5) 0.125(7) 0.033(4) 0.015(4) 0.005(3) -0.012(5)
C101 0.060(4) 0.036(3) 0.045(4) 0.001(3) 0.018(3) 0.007(3)
C102 0.051(4) 0.038(3) 0.031(3) -0.008(3) 0.005(3) -0.001(3)
C201 0.049(3) 0.037(3) 0.034(3) 0.001(2) -0.008(3) -0.007(3)
C202 0.035(3) 0.045(3) 0.035(3) -0.006(2) 0.001(2) -0.010(2)
C301 0.080(5) 0.065(4) 0.044(4) -0.007(3) -0.021(4) -0.031(4)
C302 0.094(6) 0.050(4) 0.042(4) -0.010(3) -0.009(4) 0.008(4)
C303 0.047(4) 0.057(4) 0.040(3) -0.014(3) -0.008(3) -0.013(3)
C401 0.030(3) 0.062(4) 0.069(4) 0.005(3) 0.011(3) -0.006(3)
C402 0.033(3) 0.042(3) 0.063(4) 0.007(3) 0.007(3) 0.006(3)
C501 0.046(4) 0.054(4) 0.073(5) 0.012(4) -0.023(3) -0.022(3)
C502 0.073(5) 0.046(4) 0.059(4) -0.005(3) -0.027(4) -0.015(4)
C503 0.054(4) 0.059(4) 0.084(5) 0.012(4) -0.028(4) -0.025(3)
C601 0.043(3) 0.033(3) 0.046(3) 0.001(3) 0.003(3) -0.001(3)
C602 0.047(4) 0.044(3) 0.034(3) 0.007(3) 0.000(3) -0.006(3)
C701 0.067(5) 0.055(4) 0.041(4) -0.011(3) -0.010(3) -0.002(3)
C702 0.044(4) 0.062(4) 0.053(4) 0.003(3) -0.015(3) -0.014(3)
C801 0.040(3) 0.039(3) 0.042(3) -0.006(3) -0.002(3) -0.001(2)
C802 0.041(3) 0.042(3) 0.037(3) -0.005(3) -0.002(3) 0.007(3)
C901 0.053(4) 0.079(5) 0.042(4) -0.001(3) -0.019(3) 0.000(4)
C902 0.060(4) 0.059(4) 0.047(4) 0.008(3) -0.017(3) 0.007(3)
C903 0.048(4) 0.073(5) 0.047(4) 0.007(3) -0.013(3) 0.013(4)
N1 0.032(2) 0.025(2) 0.035(2) -0.0035(18) 0.0079(19) 0.0010(18)
N2 0.080(4) 0.026(2) 0.025(2) -0.0061(19) 0.004(2) 0.001(2)
N3 0.025(2) 0.038(2) 0.025(2) -0.0017(19) -0.0021(18) 0.0055(18)
N4 0.034(3) 0.055(3) 0.028(2) -0.004(2) -0.0010(19) 0.003(2)
O10 0.0236(17) 0.0271(17) 0.0250(17) -0.0018(13) 0.0021(13) 0.0022(13)
O101 0.120(5) 0.070(3) 0.056(3) -0.009(3) 0.052(3) 0.002(3)
O102 0.093(4) 0.037(2) 0.064(3) 0.013(2) -0.015(3) 0.011(2)
O201 0.091(4) 0.040(3) 0.060(3) 0.003(2) -0.010(3) -0.032(2)
O202 0.032(3) 0.094(4) 0.081(4) -0.012(3) 0.010(2) -0.002(2)
O301 0.102(5) 0.110(5) 0.094(5) 0.012(4) -0.030(4) -0.072(4)
O302 0.192(8) 0.103(5) 0.027(3) -0.007(3) -0.007(4) 0.035(5)
O303 0.046(3) 0.062(3) 0.102(4) -0.018(3) -0.020(3) 0.015(3)
O401 0.056(3) 0.139(6) 0.089(4) 0.021(4) 0.042(3) -0.007(4)
O402 0.054(3) 0.066(3) 0.105(4) 0.022(3) -0.010(3) 0.022(3)
O501 0.081(4) 0.087(4) 0.104(5) 0.049(4) -0.021(4) -0.034(3)
O502 0.128(6) 0.048(3) 0.078(4) -0.023(3) -0.023(4) 0.008(3)
O503 0.063(4) 0.110(5) 0.129(6) 0.030(4) -0.058(4) -0.044(3)
O601 0.071(3) 0.046(3) 0.087(4) -0.012(3) 0.019(3) 0.018(3)
O602 0.075(4) 0.075(3) 0.082(4) 0.025(3) 0.001(3) -0.042(3)
O701 0.144(7) 0.093(4) 0.062(4) -0.047(3) -0.008(4) 0.000(4)
O702 0.046(3) 0.107(4) 0.097(4) 0.045(4) -0.038(3) -0.023(3)
O801 0.082(4) 0.030(2) 0.073(3) 0.009(2) -0.003(3) 0.006(2)
O802 0.066(3) 0.066(3) 0.052(3) -0.016(2) 0.010(2) 0.026(3)
O901 0.093(5) 0.142(6) 0.065(4) -0.025(4) -0.036(4) -0.018(4)
O902 0.116(5) 0.062(4) 0.088(4) 0.028(3) -0.024(4) -0.006(3)
O903 0.047(3) 0.129(5) 0.078(4) -0.002(4) -0.002(3) 0.040(3)
Cl1 0.0911(17) 0.1131(19) 0.0861(15) -0.0193(14) -0.0126(13) 0.0212(14)
Cl2 0.204(5) 0.081(2) 0.290(7) -0.063(3) 0.007(4) 0.013(2)
Ru1 0.0330(2) 0.0254(2) 0.0267(2) -0.00178(15) 0.00599(16) -0.00088(16)
Ru2 0.0254(2) 0.0275(2) 0.0219(2) -0.00406(14) 0.00128(14) -0.00489(15)
Ru3 0.0527(3) 0.0333(2) 0.0248(2) -0.00548(16) -0.00557(18) -0.00801(19)
Ru4 0.0198(2) 0.0321(2) 0.0399(2) 0.00156(17) 0.00497(16) 0.00017(15)
Ru5 0.0350(2) 0.0355(2) 0.0505(3) 0.00135(19) -0.0151(2) -0.01144(18)
Ru6 0.0262(2) 0.0288(2) 0.0263(2) 0.00019(15) 0.00031(15) -0.00119(15)
Ru7 0.0296(2) 0.0356(2) 0.0289(2) -0.00587(16) -0.00620(16) -0.00195(16)
Ru8 0.0241(2) 0.0244(2) 0.0288(2) -0.00506(15) -0.00290(15) 0.00055(14)
Ru9 0.0309(2) 0.0477(3) 0.0302(2) 0.00234(18) -0.00814(17) 0.00278(18)
 
_geom_special_details
;
 All esds (except the esd in the dihedral angle between two l.s. planes)
 are estimated using the full covariance matrix.  The cell esds are taken
 into account individually in the estimation of esds in distances, angles
 and torsion angles; correlations between esds in cell parameters are only
 used when they are defined by crystal symmetry.  An approximate (isotropic)
 treatment of cell esds is used for estimating esds involving l.s. planes.
;
 
loop_
 _geom_bond_atom_site_label_1
 _geom_bond_atom_site_label_2
 _geom_bond_distance
 _geom_bond_site_symmetry_2
 _geom_bond_publ_flag
C1 N2 1.363(8) . ?
C1 N1 1.385(7) . ?
C1 C2 1.400(9) . ?
C2 C3 1.396(11) . ?
C2 H2 0.9300 . ?
C3 C4 1.354(14) . ?
C3 H3A 0.9300 . ?
C4 C5 1.348(13) . ?
C4 H4 0.9300 . ?
C5 N2 1.363(8) . ?
C5 C6 1.508(13) . ?
C6 H6A 0.9600 . ?
C6 H6B 0.9600 . ?
C6 H6C 0.9600 . ?
C10 Cl1 1.549(14) . ?
C10 Cl2 1.862(15) . ?
C10 H10A 0.9700 . ?
C10 H10B 0.9700 . ?
C11 N4 1.352(7) . ?
C11 C12 1.385(8) . ?
C11 N3 1.403(7) . ?
C12 C13 1.386(10) . ?
C12 H12 0.9300 . ?
C13 C14 1.367(11) . ?
C13 H13 0.9300 . ?
C14 C15 1.369(10) . ?
C14 H14 0.9300 . ?
C15 N4 1.362(8) . ?
C15 C16 1.499(10) . ?
C16 H16A 0.9600 . ?
C16 H16B 0.9600 . ?
C16 H16C 0.9600 . ?
C101 O101 1.149(8) . ?
C101 Ru1 1.853(6) . ?
C102 O102 1.138(7) . ?
C102 Ru1 1.895(6) . ?
C201 O201 1.158(7) . ?
C201 Ru2 1.867(6) . ?
C202 O202 1.154(7) . ?
C202 Ru2 1.860(6) . ?
C301 O301 1.129(9) . ?
C301 Ru3 1.929(8) . ?
C302 O302 1.119(9) . ?
C302 Ru3 1.914(7) . ?
C303 O303 1.136(8) . ?
C303 Ru3 1.891(7) . ?
C401 O401 1.145(8) . ?
C401 Ru4 1.858(7) . ?
C402 O402 1.124(8) . ?
C402 Ru4 1.895(6) . ?
C501 O501 1.123(9) . ?
C501 Ru5 1.895(8) . ?
C502 O502 1.120(9) . ?
C502 Ru5 1.924(9) . ?
C503 O503 1.111(8) . ?
C503 Ru5 1.951(7) . ?
C601 O601 1.142(7) . ?
C601 Ru6 1.875(6) . ?
C602 O602 1.134(8) . ?
C602 Ru6 1.839(6) . ?
C701 O701 1.154(8) . ?
C701 Ru7 1.834(7) . ?
C702 O702 1.145(8) . ?
C702 Ru7 1.882(7) . ?
C702 Ru5 2.520(7) . ?
C801 O801 1.134(7) . ?
C801 Ru8 1.866(6) . ?
C802 O802 1.144(7) . ?
C802 Ru8 1.874(6) . ?
C901 O901 1.109(8) . ?
C901 Ru9 1.946(7) . ?
C902 O902 1.137(9) . ?
C902 Ru9 1.893(8) . ?
C903 O903 1.131(9) . ?
C903 Ru9 1.892(7) . ?
N1 Ru1 2.079(4) . ?
N1 Ru4 2.095(5) . ?
N1 Ru2 2.160(4) . ?
N2 Ru3 2.208(5) . ?
N3 Ru6 2.124(4) . ?
N3 Ru7 2.131(4) . ?
N3 H3 0.84(4) . ?
N4 Ru9 2.202(5) . ?
O10 Ru7 2.086(3) . ?
O10 Ru4 2.108(3) . ?
O10 Ru8 2.145(3) . ?
O10 Ru6 2.182(3) . ?
O10 Ru2 2.360(3) . ?
Ru1 Ru3 2.7061(6) . ?
Ru1 Ru2 2.7940(5) . ?
Ru1 Ru4 2.9642(6) . ?
Ru1 Ru8 2.9886(5) . ?
Ru1 H100 1.97(6) . ?
Ru1 H200 1.97(6) . ?
Ru2 Ru3 2.7003(5) . ?
Ru2 Ru6 2.8333(5) . ?
Ru2 Ru8 2.9802(5) . ?
Ru2 H100 1.90(6) . ?
Ru4 Ru8 2.8287(5) . ?
Ru4 Ru5 3.0513(6) . ?
Ru4 H200 1.90(6) . ?
Ru4 H300 1.83(7) . ?
Ru5 Ru8 2.7283(6) . ?
Ru5 Ru7 2.8207(6) . ?
Ru5 H300 1.79(7) . ?
Ru6 Ru9 2.7113(5) . ?
Ru6 Ru7 2.9015(5) . ?
Ru7 Ru9 2.7739(6) . ?
Ru7 Ru8 2.9123(5) . ?
Ru8 H100 1.86(6) . ?
Ru8 H200 1.74(6) . ?
 
loop_
 _geom_angle_atom_site_label_1
 _geom_angle_atom_site_label_2
 _geom_angle_atom_site_label_3
 _geom_angle
 _geom_angle_site_symmetry_1
 _geom_angle_site_symmetry_3
 _geom_angle_publ_flag
N2 C1 N1 116.0(5) . . ?
N2 C1 C2 120.6(5) . . ?
N1 C1 C2 123.3(6) . . ?
C3 C2 C1 117.6(8) . . ?
C3 C2 H2 121.2 . . ?
C1 C2 H2 121.2 . . ?
C4 C3 C2 120.9(7) . . ?
C4 C3 H3A 119.6 . . ?
C2 C3 H3A 119.6 . . ?
C5 C4 C3 119.7(7) . . ?
C5 C4 H4 120.2 . . ?
C3 C4 H4 120.2 . . ?
C4 C5 N2 122.1(8) . . ?
C4 C5 C6 119.5(7) . . ?
N2 C5 C6 118.4(7) . . ?
C5 C6 H6A 109.5 . . ?
C5 C6 H6B 109.5 . . ?
H6A C6 H6B 109.5 . . ?
C5 C6 H6C 109.5 . . ?
H6A C6 H6C 109.5 . . ?
H6B C6 H6C 109.5 . . ?
Cl1 C10 Cl2 117.0(7) . . ?
Cl1 C10 H10A 108.1 . . ?
Cl2 C10 H10A 108.1 . . ?
Cl1 C10 H10B 108.1 . . ?
Cl2 C10 H10B 108.1 . . ?
H10A C10 H10B 107.3 . . ?
N4 C11 C12 122.6(5) . . ?
N4 C11 N3 115.0(5) . . ?
C12 C11 N3 122.3(5) . . ?
C11 C12 C13 118.6(6) . . ?
C11 C12 H12 120.7 . . ?
C13 C12 H12 120.7 . . ?
C14 C13 C12 118.4(7) . . ?
C14 C13 H13 120.8 . . ?
C12 C13 H13 120.8 . . ?
C13 C14 C15 121.5(7) . . ?
C13 C14 H14 119.3 . . ?
C15 C14 H14 119.3 . . ?
N4 C15 C14 120.6(6) . . ?
N4 C15 C16 119.6(6) . . ?
C14 C15 C16 119.8(6) . . ?
C15 C16 H16A 109.5 . . ?
C15 C16 H16B 109.5 . . ?
H16A C16 H16B 109.5 . . ?
C15 C16 H16C 109.5 . . ?
H16A C16 H16C 109.5 . . ?
H16B C16 H16C 109.5 . . ?
O101 C101 Ru1 179.2(7) . . ?
O102 C102 Ru1 177.5(5) . . ?
O201 C201 Ru2 174.5(5) . . ?
O202 C202 Ru2 177.7(5) . . ?
O301 C301 Ru3 174.6(8) . . ?
O302 C302 Ru3 178.1(9) . . ?
O303 C303 Ru3 178.5(6) . . ?
O401 C401 Ru4 178.2(8) . . ?
O402 C402 Ru4 174.7(6) . . ?
O501 C501 Ru5 178.7(6) . . ?
O502 C502 Ru5 179.5(7) . . ?
O503 C503 Ru5 178.7(9) . . ?
O601 C601 Ru6 178.6(6) . . ?
O602 C602 Ru6 177.1(6) . . ?
O701 C701 Ru7 178.8(7) . . ?
O702 C702 Ru7 162.5(6) . . ?
O702 C702 Ru5 119.3(5) . . ?
Ru7 C702 Ru5 78.2(2) . . ?
O801 C801 Ru8 178.9(5) . . ?
O802 C802 Ru8 171.6(5) . . ?
O901 C901 Ru9 176.3(7) . . ?
O902 C902 Ru9 178.3(7) . . ?
O903 C903 Ru9 175.7(7) . . ?
C1 N1 Ru1 118.9(3) . . ?
C1 N1 Ru4 129.0(4) . . ?
Ru1 N1 Ru4 90.48(16) . . ?
C1 N1 Ru2 117.6(4) . . ?
Ru1 N1 Ru2 82.43(15) . . ?
Ru4 N1 Ru2 106.28(18) . . ?
C1 N2 C5 119.0(6) . . ?
C1 N2 Ru3 113.4(3) . . ?
C5 N2 Ru3 127.4(5) . . ?
C11 N3 Ru6 117.9(4) . . ?
C11 N3 Ru7 122.1(3) . . ?
Ru6 N3 Ru7 86.00(15) . . ?
C11 N3 H3 112(5) . . ?
Ru6 N3 H3 111(5) . . ?
Ru7 N3 H3 105(5) . . ?
C11 N4 C15 118.2(5) . . ?
C11 N4 Ru9 112.4(3) . . ?
C15 N4 Ru9 128.9(4) . . ?
Ru7 O10 Ru4 121.50(16) . . ?
Ru7 O10 Ru8 86.97(12) . . ?
Ru4 O10 Ru8 83.37(12) . . ?
Ru7 O10 Ru6 85.63(12) . . ?
Ru4 O10 Ru6 131.89(15) . . ?
Ru8 O10 Ru6 141.39(16) . . ?
Ru7 O10 Ru2 136.50(15) . . ?
Ru4 O10 Ru2 99.14(12) . . ?
Ru8 O10 Ru2 82.68(11) . . ?
Ru6 O10 Ru2 77.08(11) . . ?
C101 Ru1 C102 88.4(3) . . ?
C101 Ru1 N1 96.0(2) . . ?
C102 Ru1 N1 175.1(2) . . ?
C101 Ru1 Ru3 90.0(2) . . ?
C102 Ru1 Ru3 102.36(19) . . ?
N1 Ru1 Ru3 75.62(13) . . ?
C101 Ru1 Ru2 136.37(19) . . ?
C102 Ru1 Ru2 125.09(18) . . ?
N1 Ru1 Ru2 50.03(12) . . ?
Ru3 Ru1 Ru2 58.782(14) . . ?
C101 Ru1 Ru4 104.2(2) . . ?
C102 Ru1 Ru4 135.78(19) . . ?
N1 Ru1 Ru4 44.98(13) . . ?
Ru3 Ru1 Ru4 119.514(18) . . ?
Ru2 Ru1 Ru4 72.434(14) . . ?
C101 Ru1 Ru8 152.3(2) . . ?
C102 Ru1 Ru8 93.42(16) . . ?
N1 Ru1 Ru8 83.65(12) . . ?
Ru3 Ru1 Ru8 116.506(17) . . ?
Ru2 Ru1 Ru8 61.938(13) . . ?
Ru4 Ru1 Ru8 56.742(13) . . ?
C101 Ru1 H100 169.9(17) . . ?
C102 Ru1 H100 87.2(17) . . ?
N1 Ru1 H100 88.1(17) . . ?
Ru3 Ru1 H100 82.1(17) . . ?
Ru2 Ru1 H100 42.7(16) . . ?
Ru4 Ru1 H100 85.2(17) . . ?
Ru8 Ru1 H100 37.3(17) . . ?
C101 Ru1 H200 118.7(19) . . ?
C102 Ru1 H200 97.7(18) . . ?
N1 Ru1 H200 82.0(18) . . ?
Ru3 Ru1 H200 145.4(18) . . ?
Ru2 Ru1 H200 86.6(18) . . ?
Ru4 Ru1 H200 39.0(17) . . ?
Ru8 Ru1 H200 33.7(18) . . ?
H100 Ru1 H200 71(3) . . ?
C202 Ru2 C201 88.9(3) . . ?
C202 Ru2 N1 166.1(2) . . ?
C201 Ru2 N1 98.1(2) . . ?
C202 Ru2 O10 115.97(19) . . ?
C201 Ru2 O10 115.54(19) . . ?
N1 Ru2 O10 71.77(14) . . ?
C202 Ru2 Ru3 94.68(17) . . ?
C201 Ru2 Ru3 82.12(17) . . ?
N1 Ru2 Ru3 74.56(12) . . ?
O10 Ru2 Ru3 143.70(8) . . ?
C202 Ru2 Ru1 119.37(18) . . ?
C201 Ru2 Ru1 131.70(18) . . ?
N1 Ru2 Ru1 47.54(11) . . ?
O10 Ru2 Ru1 87.88(8) . . ?
Ru3 Ru2 Ru1 58.984(14) . . ?
C202 Ru2 Ru6 97.90(18) . . ?
C201 Ru2 Ru6 70.83(17) . . ?
N1 Ru2 Ru6 95.75(12) . . ?
O10 Ru2 Ru6 48.64(8) . . ?
Ru3 Ru2 Ru6 149.797(18) . . ?
Ru1 Ru2 Ru6 133.264(18) . . ?
C202 Ru2 Ru8 94.95(17) . . ?
C201 Ru2 Ru8 160.02(17) . . ?
N1 Ru2 Ru8 82.56(11) . . ?
O10 Ru2 Ru8 45.56(8) . . ?
Ru3 Ru2 Ru8 116.971(17) . . ?
Ru1 Ru2 Ru8 62.241(13) . . ?
Ru6 Ru2 Ru8 89.213(14) . . ?
C202 Ru2 H100 82.2(18) . . ?
C201 Ru2 H100 162.5(18) . . ?
N1 Ru2 H100 87.8(18) . . ?
O10 Ru2 H100 81.9(18) . . ?
Ru3 Ru2 H100 83.6(17) . . ?
Ru1 Ru2 H100 44.9(18) . . ?
Ru6 Ru2 H100 125.2(17) . . ?
Ru8 Ru2 H100 36.9(17) . . ?
C303 Ru3 C302 91.5(3) . . ?
C303 Ru3 C301 90.3(3) . . ?
C302 Ru3 C301 97.9(3) . . ?
C303 Ru3 N2 168.0(2) . . ?
C302 Ru3 N2 91.7(3) . . ?
C301 Ru3 N2 100.7(3) . . ?
C303 Ru3 Ru2 92.14(18) . . ?
C302 Ru3 Ru2 162.9(3) . . ?
C301 Ru3 Ru2 98.8(2) . . ?
N2 Ru3 Ru2 81.59(12) . . ?
C303 Ru3 Ru1 82.09(19) . . ?
C302 Ru3 Ru1 101.8(3) . . ?
C301 Ru3 Ru1 159.1(2) . . ?
N2 Ru3 Ru1 85.94(14) . . ?
Ru2 Ru3 Ru1 62.234(14) . . ?
C401 Ru4 C402 89.2(3) . . ?
C401 Ru4 N1 97.5(3) . . ?
C402 Ru4 N1 104.2(2) . . ?
C401 Ru4 O10 172.5(2) . . ?
C402 Ru4 O10 97.9(2) . . ?
N1 Ru4 O10 78.32(15) . . ?
C401 Ru4 Ru8 125.2(2) . . ?
C402 Ru4 Ru8 142.3(2) . . ?
N1 Ru4 Ru8 87.53(11) . . ?
O10 Ru4 Ru8 48.88(9) . . ?
C401 Ru4 Ru1 84.2(2) . . ?
C402 Ru4 Ru1 146.3(2) . . ?
N1 Ru4 Ru1 44.55(12) . . ?
O10 Ru4 Ru1 88.43(9) . . ?
Ru8 Ru4 Ru1 62.063(13) . . ?
C401 Ru4 Ru5 106.6(2) . . ?
C402 Ru4 Ru5 104.5(2) . . ?
N1 Ru4 Ru5 142.51(11) . . ?
O10 Ru4 Ru5 74.28(9) . . ?
Ru8 Ru4 Ru5 55.133(13) . . ?
Ru1 Ru4 Ru5 109.145(16) . . ?
C401 Ru4 H200 89.4(19) . . ?
C402 Ru4 H200 172.4(18) . . ?
N1 Ru4 H200 83.4(18) . . ?
O10 Ru4 H200 84.0(19) . . ?
Ru8 Ru4 H200 36.8(19) . . ?
Ru1 Ru4 H200 40.9(18) . . ?
Ru5 Ru4 H200 68.9(18) . . ?
C401 Ru4 H300 89(2) . . ?
C402 Ru4 H300 78(2) . . ?
N1 Ru4 H300 173(2) . . ?
O10 Ru4 H300 95(2) . . ?
Ru8 Ru4 H300 87(2) . . ?
Ru1 Ru4 H300 135(2) . . ?
Ru5 Ru4 H300 32(2) . . ?
H200 Ru4 H300 95(3) . . ?
C501 Ru5 C502 94.6(3) . . ?
C501 Ru5 C503 92.3(3) . . ?
C502 Ru5 C503 96.1(3) . . ?
C501 Ru5 C702 161.7(3) . . ?
C502 Ru5 C702 100.8(3) . . ?
C503 Ru5 C702 76.4(3) . . ?
C501 Ru5 Ru8 88.74(19) . . ?
C502 Ru5 Ru8 89.5(2) . . ?
C503 Ru5 Ru8 174.2(3) . . ?
C702 Ru5 Ru8 101.08(15) . . ?
C501 Ru5 Ru7 152.02(19) . . ?
C502 Ru5 Ru7 85.4(2) . . ?
C503 Ru5 Ru7 115.5(2) . . ?
C702 Ru5 Ru7 40.77(15) . . ?
Ru8 Ru5 Ru7 63.287(14) . . ?
C501 Ru5 Ru4 88.8(2) . . ?
C502 Ru5 Ru4 147.5(2) . . ?
C503 Ru5 Ru4 116.0(3) . . ?
C702 Ru5 Ru4 83.47(16) . . ?
Ru8 Ru5 Ru4 58.286(13) . . ?
Ru7 Ru5 Ru4 76.989(15) . . ?
C501 Ru5 H300 90(2) . . ?
C502 Ru5 H300 175(2) . . ?
C503 Ru5 H300 83(2) . . ?
C702 Ru5 H300 75(2) . . ?
Ru8 Ru5 H300 91(2) . . ?
Ru7 Ru5 H300 91(2) . . ?
Ru4 Ru5 H300 33(2) . . ?
C602 Ru6 C601 88.0(3) . . ?
C602 Ru6 N3 99.1(2) . . ?
C601 Ru6 N3 170.8(2) . . ?
C602 Ru6 O10 166.7(2) . . ?
C601 Ru6 O10 100.1(2) . . ?
N3 Ru6 O10 74.14(15) . . ?
C602 Ru6 Ru9 87.58(19) . . ?
C601 Ru6 Ru9 102.15(19) . . ?
N3 Ru6 Ru9 72.53(12) . . ?
O10 Ru6 Ru9 100.98(9) . . ?
C602 Ru6 Ru2 114.38(19) . . ?
C601 Ru6 Ru2 97.62(19) . . ?
N3 Ru6 Ru2 84.83(12) . . ?
O10 Ru6 Ru2 54.28(9) . . ?
Ru9 Ru6 Ru2 150.944(19) . . ?
C602 Ru6 Ru7 136.33(19) . . ?
C601 Ru6 Ru7 123.80(19) . . ?
N3 Ru6 Ru7 47.10(12) . . ?
O10 Ru6 Ru7 45.80(8) . . ?
Ru9 Ru6 Ru7 59.120(14) . . ?
Ru2 Ru6 Ru7 92.154(15) . . ?
C701 Ru7 C702 87.2(3) . . ?
C701 Ru7 O10 168.4(2) . . ?
C702 Ru7 O10 102.9(2) . . ?
C701 Ru7 N3 97.8(3) . . ?
C702 Ru7 N3 152.2(2) . . ?
O10 Ru7 N3 75.97(14) . . ?
C701 Ru7 Ru9 85.3(2) . . ?
C702 Ru7 Ru9 82.2(2) . . ?
O10 Ru7 Ru9 101.55(9) . . ?
N3 Ru7 Ru9 71.09(12) . . ?
C701 Ru7 Ru5 100.4(2) . . ?
C702 Ru7 Ru5 61.0(2) . . ?
O10 Ru7 Ru5 80.01(9) . . ?
N3 Ru7 Ru5 143.00(12) . . ?
Ru9 Ru7 Ru5 142.13(2) . . ?
C701 Ru7 Ru6 132.9(2) . . ?
C702 Ru7 Ru6 111.5(2) . . ?
O10 Ru7 Ru6 48.57(9) . . ?
N3 Ru7 Ru6 46.90(11) . . ?
Ru9 Ru7 Ru6 57.020(14) . . ?
Ru5 Ru7 Ru6 126.600(18) . . ?
C701 Ru7 Ru8 123.3(2) . . ?
C702 Ru7 Ru8 113.8(2) . . ?
O10 Ru7 Ru8 47.36(9) . . ?
N3 Ru7 Ru8 86.30(12) . . ?
Ru9 Ru7 Ru8 146.265(19) . . ?
Ru5 Ru7 Ru8 56.808(14) . . ?
Ru6 Ru7 Ru8 89.245(15) . . ?
C801 Ru8 C802 84.7(3) . . ?
C801 Ru8 O10 170.2(2) . . ?
C802 Ru8 O10 104.2(2) . . ?
C801 Ru8 Ru5 93.51(19) . . ?
C802 Ru8 Ru5 98.74(19) . . ?
O10 Ru8 Ru5 81.27(9) . . ?
C801 Ru8 Ru4 122.57(19) . . ?
C802 Ru8 Ru4 148.37(18) . . ?
O10 Ru8 Ru4 47.75(8) . . ?
Ru5 Ru8 Ru4 66.582(15) . . ?
C801 Ru8 Ru7 137.58(18) . . ?
C802 Ru8 Ru7 69.33(18) . . ?
O10 Ru8 Ru7 45.67(9) . . ?
Ru5 Ru8 Ru7 59.905(14) . . ?
Ru4 Ru8 Ru7 79.186(15) . . ?
C801 Ru8 Ru2 130.66(19) . . ?
C802 Ru8 Ru2 104.00(19) . . ?
O10 Ru8 Ru2 51.76(9) . . ?
Ru5 Ru8 Ru2 131.328(17) . . ?
Ru4 Ru8 Ru2 71.716(14) . . ?
Ru7 Ru8 Ru2 89.015(14) . . ?
C801 Ru8 Ru1 88.10(18) . . ?
C802 Ru8 Ru1 142.93(19) . . ?
O10 Ru8 Ru1 87.11(9) . . ?
Ru5 Ru8 Ru1 117.996(18) . . ?
Ru4 Ru8 Ru1 61.195(14) . . ?
Ru7 Ru8 Ru1 132.564(16) . . ?
Ru2 Ru8 Ru1 55.821(12) . . ?
C801 Ru8 H100 92.8(18) . . ?
C802 Ru8 H100 103.9(18) . . ?
O10 Ru8 H100 89.0(18) . . ?
Ru5 Ru8 H100 156.9(18) . . ?
Ru4 Ru8 H100 91.4(18) . . ?
Ru7 Ru8 H100 125.0(18) . . ?
Ru2 Ru8 H100 37.9(18) . . ?
Ru1 Ru8 H100 40.1(18) . . ?
C801 Ru8 H200 84(2) . . ?
C802 Ru8 H200 169(2) . . ?
O10 Ru8 H200 87(2) . . ?
Ru5 Ru8 H200 80(2) . . ?
Ru4 Ru8 H200 41(2) . . ?
Ru7 Ru8 H200 118(2) . . ?
Ru2 Ru8 H200 85(2) . . ?
Ru1 Ru8 H200 39(2) . . ?
H100 Ru8 H200 79(3) . . ?
C903 Ru9 C902 86.5(3) . . ?
C903 Ru9 C901 94.5(3) . . ?
C902 Ru9 C901 98.4(3) . . ?
C903 Ru9 N4 171.0(3) . . ?
C902 Ru9 N4 91.0(3) . . ?
C901 Ru9 N4 94.4(3) . . ?
C903 Ru9 Ru6 85.7(2) . . ?
C902 Ru9 Ru6 98.8(2) . . ?
C901 Ru9 Ru6 162.8(2) . . ?
N4 Ru9 Ru6 86.22(12) . . ?
C903 Ru9 Ru7 95.5(2) . . ?
C902 Ru9 Ru7 162.2(2) . . ?
C901 Ru9 Ru7 99.1(2) . . ?
N4 Ru9 Ru7 84.25(13) . . ?
Ru6 Ru9 Ru7 63.860(14) . . ?
 
loop_
 _geom_torsion_atom_site_label_1
 _geom_torsion_atom_site_label_2
 _geom_torsion_atom_site_label_3
 _geom_torsion_atom_site_label_4
 _geom_torsion
 _geom_torsion_site_symmetry_1
 _geom_torsion_site_symmetry_2
 _geom_torsion_site_symmetry_3
 _geom_torsion_site_symmetry_4
 _geom_torsion_publ_flag
N2 C1 C2 C3 4.7(9) . . . . ?
N1 C1 C2 C3 -172.9(5) . . . . ?
C1 C2 C3 C4 -1.1(10) . . . . ?
C2 C3 C4 C5 -1.4(11) . . . . ?
C3 C4 C5 N2 0.5(11) . . . . ?
C3 C4 C5 C6 179.3(7) . . . . ?
N4 C11 C12 C13 -0.2(11) . . . . ?
N3 C11 C12 C13 -178.6(7) . . . . ?
C11 C12 C13 C14 -2.0(13) . . . . ?
C12 C13 C14 C15 1.6(14) . . . . ?
C13 C14 C15 N4 1.0(13) . . . . ?
C13 C14 C15 C16 -179.3(9) . . . . ?
N2 C1 N1 Ru1 57.6(6) . . . . ?
C2 C1 N1 Ru1 -124.7(5) . . . . ?
N2 C1 N1 Ru4 174.9(4) . . . . ?
C2 C1 N1 Ru4 -7.4(8) . . . . ?
N2 C1 N1 Ru2 -39.1(6) . . . . ?
C2 C1 N1 Ru2 138.6(5) . . . . ?
N1 C1 N2 C5 172.1(5) . . . . ?
C2 C1 N2 C5 -5.7(8) . . . . ?
N1 C1 N2 Ru3 -13.4(6) . . . . ?
C2 C1 N2 Ru3 168.9(4) . . . . ?
C4 C5 N2 C1 3.1(9) . . . . ?
C6 C5 N2 C1 -175.7(6) . . . . ?
C4 C5 N2 Ru3 -170.6(5) . . . . ?
C6 C5 N2 Ru3 10.6(9) . . . . ?
N4 C11 N3 Ru6 -58.2(6) . . . . ?
C12 C11 N3 Ru6 120.3(6) . . . . ?
N4 C11 N3 Ru7 45.7(6) . . . . ?
C12 C11 N3 Ru7 -135.9(5) . . . . ?
C12 C11 N4 C15 2.8(9) . . . . ?
N3 C11 N4 C15 -178.8(5) . . . . ?
C12 C11 N4 Ru9 -170.1(5) . . . . ?
N3 C11 N4 Ru9 8.4(6) . . . . ?
C14 C15 N4 C11 -3.1(10) . . . . ?
C16 C15 N4 C11 177.1(7) . . . . ?
C14 C15 N4 Ru9 168.3(6) . . . . ?
C16 C15 N4 Ru9 -11.4(10) . . . . ?
C1 N1 Ru1 C101 32.1(5) . . . . ?
Ru4 N1 Ru1 C101 -104.1(3) . . . . ?
Ru2 N1 Ru1 C101 149.5(3) . . . . ?
C1 N1 Ru1 Ru3 -56.3(4) . . . . ?
Ru4 N1 Ru1 Ru3 167.47(14) . . . . ?
Ru2 N1 Ru1 Ru3 61.10(9) . . . . ?
C1 N1 Ru1 Ru2 -117.4(5) . . . . ?
Ru4 N1 Ru1 Ru2 106.36(17) . . . . ?
C1 N1 Ru1 Ru4 136.3(5) . . . . ?
Ru2 N1 Ru1 Ru4 -106.36(17) . . . . ?
C1 N1 Ru1 Ru8 -175.7(4) . . . . ?
Ru4 N1 Ru1 Ru8 47.99(11) . . . . ?
Ru2 N1 Ru1 Ru8 -58.38(10) . . . . ?
C1 N1 Ru2 C202 97.1(9) . . . . ?
Ru1 N1 Ru2 C202 -21.6(9) . . . . ?
Ru4 N1 Ru2 C202 -109.9(8) . . . . ?
C1 N1 Ru2 C201 -22.6(4) . . . . ?
Ru1 N1 Ru2 C201 -141.3(2) . . . . ?
Ru4 N1 Ru2 C201 130.4(2) . . . . ?
C1 N1 Ru2 O10 -136.9(4) . . . . ?
Ru1 N1 Ru2 O10 104.39(15) . . . . ?
Ru4 N1 Ru2 O10 16.12(15) . . . . ?
C1 N1 Ru2 Ru3 56.8(4) . . . . ?
Ru1 N1 Ru2 Ru3 -61.85(10) . . . . ?
Ru4 N1 Ru2 Ru3 -150.12(18) . . . . ?
C1 N1 Ru2 Ru1 118.7(4) . . . . ?
Ru4 N1 Ru2 Ru1 -88.28(18) . . . . ?
C1 N1 Ru2 Ru6 -94.0(4) . . . . ?
Ru1 N1 Ru2 Ru6 147.30(10) . . . . ?
Ru4 N1 Ru2 Ru6 59.03(16) . . . . ?
C1 N1 Ru2 Ru8 177.5(4) . . . . ?
Ru1 N1 Ru2 Ru8 58.86(10) . . . . ?
Ru4 N1 Ru2 Ru8 -29.42(14) . . . . ?
Ru7 O10 Ru2 C202 -7.8(3) . . . . ?
Ru4 O10 Ru2 C202 152.0(2) . . . . ?
Ru8 O10 Ru2 C202 69.9(2) . . . . ?
Ru6 O10 Ru2 C202 -77.0(2) . . . . ?
Ru7 O10 Ru2 C201 94.3(3) . . . . ?
Ru4 O10 Ru2 C201 -106.0(2) . . . . ?
Ru8 O10 Ru2 C201 172.0(2) . . . . ?
Ru6 O10 Ru2 C201 25.1(2) . . . . ?
Ru7 O10 Ru2 N1 -175.3(3) . . . . ?
Ru4 O10 Ru2 N1 -15.56(14) . . . . ?
Ru8 O10 Ru2 N1 -97.59(14) . . . . ?
Ru6 O10 Ru2 N1 115.50(14) . . . . ?
Ru7 O10 Ru2 Ru3 -152.52(13) . . . . ?
Ru4 O10 Ru2 Ru3 7.2(2) . . . . ?
Ru8 O10 Ru2 Ru3 -74.81(14) . . . . ?
Ru6 O10 Ru2 Ru3 138.28(8) . . . . ?
Ru7 O10 Ru2 Ru1 -129.7(2) . . . . ?
Ru4 O10 Ru2 Ru1 30.09(10) . . . . ?
Ru8 O10 Ru2 Ru1 -51.94(7) . . . . ?
Ru6 O10 Ru2 Ru1 161.15(7) . . . . ?
Ru7 O10 Ru2 Ru6 69.2(2) . . . . ?
Ru4 O10 Ru2 Ru6 -131.06(15) . . . . ?
Ru8 O10 Ru2 Ru6 146.90(13) . . . . ?
Ru7 O10 Ru2 Ru8 -77.7(2) . . . . ?
Ru4 O10 Ru2 Ru8 82.03(12) . . . . ?
Ru6 O10 Ru2 Ru8 -146.90(13) . . . . ?
C101 Ru1 Ru2 C202 127.2(4) . . . . ?
C102 Ru1 Ru2 C202 -6.4(3) . . . . ?
N1 Ru1 Ru2 C202 174.2(3) . . . . ?
Ru3 Ru1 Ru2 C202 76.8(2) . . . . ?
Ru4 Ru1 Ru2 C202 -140.5(2) . . . . ?
Ru8 Ru1 Ru2 C202 -79.4(2) . . . . ?
C101 Ru1 Ru2 C201 9.0(4) . . . . ?
C102 Ru1 Ru2 C201 -124.5(3) . . . . ?
N1 Ru1 Ru2 C201 56.0(3) . . . . ?
Ru3 Ru1 Ru2 C201 -41.4(3) . . . . ?
Ru4 Ru1 Ru2 C201 101.3(3) . . . . ?
Ru8 Ru1 Ru2 C201 162.5(3) . . . . ?
C101 Ru1 Ru2 N1 -47.0(4) . . . . ?
C102 Ru1 Ru2 N1 179.5(3) . . . . ?
Ru3 Ru1 Ru2 N1 -97.41(16) . . . . ?
Ru4 Ru1 Ru2 N1 45.35(16) . . . . ?
Ru8 Ru1 Ru2 N1 106.46(16) . . . . ?
C101 Ru1 Ru2 O10 -114.0(3) . . . . ?
C102 Ru1 Ru2 O10 112.5(2) . . . . ?
N1 Ru1 Ru2 O10 -67.01(18) . . . . ?
Ru3 Ru1 Ru2 O10 -164.43(8) . . . . ?
Ru4 Ru1 Ru2 O10 -21.67(8) . . . . ?
Ru8 Ru1 Ru2 O10 39.44(8) . . . . ?
C101 Ru1 Ru2 Ru3 50.4(3) . . . . ?
C102 Ru1 Ru2 Ru3 -83.1(2) . . . . ?
N1 Ru1 Ru2 Ru3 97.41(16) . . . . ?
Ru4 Ru1 Ru2 Ru3 142.758(18) . . . . ?
Ru8 Ru1 Ru2 Ru3 -156.131(18) . . . . ?
C101 Ru1 Ru2 Ru6 -94.6(3) . . . . ?
C102 Ru1 Ru2 Ru6 131.9(2) . . . . ?
N1 Ru1 Ru2 Ru6 -47.57(16) . . . . ?
Ru3 Ru1 Ru2 Ru6 -144.98(3) . . . . ?
Ru4 Ru1 Ru2 Ru6 -2.22(2) . . . . ?
Ru8 Ru1 Ru2 Ru6 58.89(2) . . . . ?
C101 Ru1 Ru2 Ru8 -153.5(3) . . . . ?
C102 Ru1 Ru2 Ru8 73.0(2) . . . . ?
N1 Ru1 Ru2 Ru8 -106.46(16) . . . . ?
Ru3 Ru1 Ru2 Ru8 156.131(18) . . . . ?
Ru4 Ru1 Ru2 Ru8 -61.111(13) . . . . ?
C1 N2 Ru3 C303 -16.1(13) . . . . ?
C5 N2 Ru3 C303 157.9(11) . . . . ?
C1 N2 Ru3 C302 -121.2(4) . . . . ?
C5 N2 Ru3 C302 52.8(6) . . . . ?
C1 N2 Ru3 C301 140.5(4) . . . . ?
C5 N2 Ru3 C301 -45.6(6) . . . . ?
C1 N2 Ru3 Ru2 43.0(3) . . . . ?
C5 N2 Ru3 Ru2 -143.0(5) . . . . ?
C1 N2 Ru3 Ru1 -19.5(4) . . . . ?
C5 N2 Ru3 Ru1 154.5(5) . . . . ?
C202 Ru2 Ru3 C303 -41.8(3) . . . . ?
C201 Ru2 Ru3 C303 -130.0(3) . . . . ?
N1 Ru2 Ru3 C303 129.3(2) . . . . ?
O10 Ru2 Ru3 C303 106.8(2) . . . . ?
Ru1 Ru2 Ru3 C303 79.9(2) . . . . ?
Ru6 Ru2 Ru3 C303 -156.3(2) . . . . ?
Ru8 Ru2 Ru3 C303 56.2(2) . . . . ?
C202 Ru2 Ru3 C302 -143.9(8) . . . . ?
C201 Ru2 Ru3 C302 127.9(8) . . . . ?
N1 Ru2 Ru3 C302 27.2(7) . . . . ?
O10 Ru2 Ru3 C302 4.7(8) . . . . ?
Ru1 Ru2 Ru3 C302 -22.2(7) . . . . ?
Ru6 Ru2 Ru3 C302 101.6(7) . . . . ?
Ru8 Ru2 Ru3 C302 -45.9(7) . . . . ?
C202 Ru2 Ru3 C301 48.9(3) . . . . ?
C201 Ru2 Ru3 C301 -39.4(3) . . . . ?
N1 Ru2 Ru3 C301 -140.1(3) . . . . ?
O10 Ru2 Ru3 C301 -162.5(3) . . . . ?
Ru1 Ru2 Ru3 C301 170.6(3) . . . . ?
Ru6 Ru2 Ru3 C301 -65.6(3) . . . . ?
Ru8 Ru2 Ru3 C301 146.9(3) . . . . ?
C202 Ru2 Ru3 N2 148.5(2) . . . . ?
C201 Ru2 Ru3 N2 60.3(2) . . . . ?
N1 Ru2 Ru3 N2 -40.44(18) . . . . ?
O10 Ru2 Ru3 N2 -62.87(19) . . . . ?
Ru1 Ru2 Ru3 N2 -89.82(14) . . . . ?
Ru6 Ru2 Ru3 N2 34.01(15) . . . . ?
Ru8 Ru2 Ru3 N2 -113.51(14) . . . . ?
C202 Ru2 Ru3 Ru1 -121.67(18) . . . . ?
C201 Ru2 Ru3 Ru1 150.1(2) . . . . ?
N1 Ru2 Ru3 Ru1 49.38(11) . . . . ?
O10 Ru2 Ru3 Ru1 26.95(13) . . . . ?
Ru6 Ru2 Ru3 Ru1 123.83(4) . . . . ?
Ru8 Ru2 Ru3 Ru1 -23.690(18) . . . . ?
C101 Ru1 Ru3 C303 115.5(3) . . . . ?
C102 Ru1 Ru3 C303 27.1(3) . . . . ?
N1 Ru1 Ru3 C303 -148.3(2) . . . . ?
Ru2 Ru1 Ru3 C303 -96.6(2) . . . . ?
Ru4 Ru1 Ru3 C303 -138.2(2) . . . . ?
Ru8 Ru1 Ru3 C303 -73.1(2) . . . . ?
C101 Ru1 Ru3 C302 25.6(3) . . . . ?
C102 Ru1 Ru3 C302 -62.8(3) . . . . ?
N1 Ru1 Ru3 C302 121.8(3) . . . . ?
Ru2 Ru1 Ru3 C302 173.5(2) . . . . ?
Ru4 Ru1 Ru3 C302 131.9(2) . . . . ?
Ru8 Ru1 Ru3 C302 -163.0(2) . . . . ?
C101 Ru1 Ru3 C301 -174.9(7) . . . . ?
C102 Ru1 Ru3 C301 96.7(7) . . . . ?
N1 Ru1 Ru3 C301 -78.7(7) . . . . ?
Ru2 Ru1 Ru3 C301 -27.0(7) . . . . ?
Ru4 Ru1 Ru3 C301 -68.5(7) . . . . ?
Ru8 Ru1 Ru3 C301 -3.5(7) . . . . ?
C101 Ru1 Ru3 N2 -65.2(2) . . . . ?
C102 Ru1 Ru3 N2 -153.6(2) . . . . ?
N1 Ru1 Ru3 N2 30.95(17) . . . . ?
Ru2 Ru1 Ru3 N2 82.63(12) . . . . ?
Ru4 Ru1 Ru3 N2 41.10(12) . . . . ?
Ru8 Ru1 Ru3 N2 106.15(12) . . . . ?
C101 Ru1 Ru3 Ru2 -147.9(2) . . . . ?
C102 Ru1 Ru3 Ru2 123.74(17) . . . . ?
N1 Ru1 Ru3 Ru2 -51.68(12) . . . . ?
Ru4 Ru1 Ru3 Ru2 -41.529(19) . . . . ?
Ru8 Ru1 Ru3 Ru2 23.517(18) . . . . ?
C1 N1 Ru4 C401 -55.0(5) . . . . ?
Ru1 N1 Ru4 C401 73.9(2) . . . . ?
Ru2 N1 Ru4 C401 156.1(3) . . . . ?
C1 N1 Ru4 C402 36.0(5) . . . . ?
Ru1 N1 Ru4 C402 164.9(2) . . . . ?
Ru2 N1 Ru4 C402 -112.8(2) . . . . ?
C1 N1 Ru4 O10 131.3(4) . . . . ?
Ru1 N1 Ru4 O10 -99.79(15) . . . . ?
Ru2 N1 Ru4 O10 -17.54(16) . . . . ?
C1 N1 Ru4 Ru8 179.8(4) . . . . ?
Ru1 N1 Ru4 Ru8 -51.34(11) . . . . ?
Ru2 N1 Ru4 Ru8 30.91(15) . . . . ?
C1 N1 Ru4 Ru1 -128.9(5) . . . . ?
Ru2 N1 Ru4 Ru1 82.25(17) . . . . ?
C1 N1 Ru4 Ru5 174.9(3) . . . . ?
Ru1 N1 Ru4 Ru5 -56.2(2) . . . . ?
Ru2 N1 Ru4 Ru5 26.1(3) . . . . ?
Ru7 O10 Ru4 C402 -77.7(3) . . . . ?
Ru8 O10 Ru4 C402 -160.0(2) . . . . ?
Ru6 O10 Ru4 C402 37.7(3) . . . . ?
Ru2 O10 Ru4 C402 118.5(2) . . . . ?
Ru7 O10 Ru4 N1 179.3(2) . . . . ?
Ru8 O10 Ru4 N1 97.01(14) . . . . ?
Ru6 O10 Ru4 N1 -65.2(2) . . . . ?
Ru2 O10 Ru4 N1 15.56(14) . . . . ?
Ru7 O10 Ru4 Ru8 82.32(16) . . . . ?
Ru6 O10 Ru4 Ru8 -162.3(3) . . . . ?
Ru2 O10 Ru4 Ru8 -81.45(11) . . . . ?
Ru7 O10 Ru4 Ru1 135.58(16) . . . . ?
Ru8 O10 Ru4 Ru1 53.26(8) . . . . ?
Ru6 O10 Ru4 Ru1 -109.0(2) . . . . ?
Ru2 O10 Ru4 Ru1 -28.19(9) . . . . ?
Ru7 O10 Ru4 Ru5 25.18(13) . . . . ?
Ru8 O10 Ru4 Ru5 -57.14(7) . . . . ?
Ru6 O10 Ru4 Ru5 140.6(2) . . . . ?
Ru2 O10 Ru4 Ru5 -138.59(11) . . . . ?
C101 Ru1 Ru4 C401 -22.6(3) . . . . ?
C102 Ru1 Ru4 C401 80.1(3) . . . . ?
N1 Ru1 Ru4 C401 -106.8(3) . . . . ?
Ru3 Ru1 Ru4 C401 -120.8(2) . . . . ?
Ru2 Ru1 Ru4 C401 -157.3(2) . . . . ?
Ru8 Ru1 Ru4 C401 135.2(2) . . . . ?
C101 Ru1 Ru4 C402 57.2(4) . . . . ?
C102 Ru1 Ru4 C402 159.9(4) . . . . ?
N1 Ru1 Ru4 C402 -27.0(4) . . . . ?
Ru3 Ru1 Ru4 C402 -41.0(3) . . . . ?
Ru2 Ru1 Ru4 C402 -77.5(3) . . . . ?
Ru8 Ru1 Ru4 C402 -145.0(3) . . . . ?
C101 Ru1 Ru4 N1 84.2(3) . . . . ?
C102 Ru1 Ru4 N1 -173.1(3) . . . . ?
Ru3 Ru1 Ru4 N1 -13.98(16) . . . . ?
Ru2 Ru1 Ru4 N1 -50.47(16) . . . . ?
Ru8 Ru1 Ru4 N1 -117.98(16) . . . . ?
C101 Ru1 Ru4 O10 159.1(2) . . . . ?
C102 Ru1 Ru4 O10 -98.2(3) . . . . ?
N1 Ru1 Ru4 O10 74.88(18) . . . . ?
Ru3 Ru1 Ru4 O10 60.90(9) . . . . ?
Ru2 Ru1 Ru4 O10 24.41(9) . . . . ?
Ru8 Ru1 Ru4 O10 -43.10(9) . . . . ?
C101 Ru1 Ru4 Ru8 -157.8(2) . . . . ?
C102 Ru1 Ru4 Ru8 -55.1(3) . . . . ?
N1 Ru1 Ru4 Ru8 117.98(16) . . . . ?
Ru3 Ru1 Ru4 Ru8 104.01(2) . . . . ?
Ru2 Ru1 Ru4 Ru8 67.513(13) . . . . ?
C101 Ru1 Ru4 Ru5 -128.2(2) . . . . ?
C102 Ru1 Ru4 Ru5 -25.5(3) . . . . ?
N1 Ru1 Ru4 Ru5 147.63(16) . . . . ?
Ru3 Ru1 Ru4 Ru5 133.66(2) . . . . ?
Ru2 Ru1 Ru4 Ru5 97.162(17) . . . . ?
Ru8 Ru1 Ru4 Ru5 29.649(15) . . . . ?
Ru7 C702 Ru5 C501 143.1(7) . . . . ?
O702 C702 Ru5 C502 109.2(7) . . . . ?
Ru7 C702 Ru5 C502 -69.8(3) . . . . ?
O702 C702 Ru5 C503 15.5(7) . . . . ?
Ru7 C702 Ru5 C503 -163.6(4) . . . . ?
O702 C702 Ru5 Ru8 -159.2(6) . . . . ?
Ru7 C702 Ru5 Ru8 21.8(2) . . . . ?
O702 C702 Ru5 Ru7 179.0(8) . . . . ?
O702 C702 Ru5 Ru4 -103.4(7) . . . . ?
Ru7 C702 Ru5 Ru4 77.63(19) . . . . ?
C401 Ru4 Ru5 C501 -32.5(3) . . . . ?
C402 Ru4 Ru5 C501 -126.0(3) . . . . ?
N1 Ru4 Ru5 C501 95.2(3) . . . . ?
O10 Ru4 Ru5 C501 139.7(2) . . . . ?
Ru8 Ru4 Ru5 C501 89.3(2) . . . . ?
Ru1 Ru4 Ru5 C501 57.1(2) . . . . ?
C401 Ru4 Ru5 C502 -129.2(5) . . . . ?
C402 Ru4 Ru5 C502 137.3(5) . . . . ?
N1 Ru4 Ru5 C502 -1.5(5) . . . . ?
O10 Ru4 Ru5 C502 43.0(4) . . . . ?
Ru8 Ru4 Ru5 C502 -7.4(4) . . . . ?
Ru1 Ru4 Ru5 C502 -39.6(4) . . . . ?
C401 Ru4 Ru5 C503 59.5(3) . . . . ?
C402 Ru4 Ru5 C503 -34.0(3) . . . . ?
N1 Ru4 Ru5 C503 -172.8(3) . . . . ?
O10 Ru4 Ru5 C503 -128.3(3) . . . . ?
Ru8 Ru4 Ru5 C503 -178.7(3) . . . . ?
Ru1 Ru4 Ru5 C503 149.1(3) . . . . ?
C401 Ru4 Ru5 C702 130.9(3) . . . . ?
C402 Ru4 Ru5 C702 37.4(3) . . . . ?
N1 Ru4 Ru5 C702 -101.4(3) . . . . ?
O10 Ru4 Ru5 C702 -56.88(18) . . . . ?
Ru8 Ru4 Ru5 C702 -107.35(16) . . . . ?
Ru1 Ru4 Ru5 C702 -139.53(16) . . . . ?
C401 Ru4 Ru5 Ru8 -121.7(2) . . . . ?
C402 Ru4 Ru5 Ru8 144.73(19) . . . . ?
N1 Ru4 Ru5 Ru8 5.91(19) . . . . ?
O10 Ru4 Ru5 Ru8 50.47(9) . . . . ?
Ru1 Ru4 Ru5 Ru8 -32.186(16) . . . . ?
C401 Ru4 Ru5 Ru7 171.8(2) . . . . ?
C402 Ru4 Ru5 Ru7 78.28(19) . . . . ?
N1 Ru4 Ru5 Ru7 -60.54(19) . . . . ?
O10 Ru4 Ru5 Ru7 -15.98(9) . . . . ?
Ru8 Ru4 Ru5 Ru7 -66.450(15) . . . . ?
Ru1 Ru4 Ru5 Ru7 -98.635(17) . . . . ?
C11 N3 Ru6 C602 -23.9(4) . . . . ?
Ru7 N3 Ru6 C602 -148.3(2) . . . . ?
C11 N3 Ru6 O10 167.9(4) . . . . ?
Ru7 N3 Ru6 O10 43.51(13) . . . . ?
C11 N3 Ru6 Ru9 60.7(4) . . . . ?
Ru7 N3 Ru6 Ru9 -63.77(10) . . . . ?
C11 N3 Ru6 Ru2 -137.8(4) . . . . ?
Ru7 N3 Ru6 Ru2 97.80(11) . . . . ?
C11 N3 Ru6 Ru7 124.4(4) . . . . ?
Ru7 O10 Ru6 C602 -105.8(9) . . . . ?
Ru4 O10 Ru6 C602 124.8(9) . . . . ?
Ru8 O10 Ru6 C602 -26.2(10) . . . . ?
Ru2 O10 Ru6 C602 34.0(9) . . . . ?
Ru7 O10 Ru6 C601 128.0(2) . . . . ?
Ru4 O10 Ru6 C601 -1.4(3) . . . . ?
Ru8 O10 Ru6 C601 -152.4(3) . . . . ?
Ru2 O10 Ru6 C601 -92.2(2) . . . . ?
Ru7 O10 Ru6 N3 -44.71(14) . . . . ?
Ru4 O10 Ru6 N3 -174.1(3) . . . . ?
Ru8 O10 Ru6 N3 34.9(3) . . . . ?
Ru2 O10 Ru6 N3 95.10(14) . . . . ?
Ru7 O10 Ru6 Ru9 23.39(10) . . . . ?
Ru4 O10 Ru6 Ru9 -106.05(19) . . . . ?
Ru8 O10 Ru6 Ru9 103.0(2) . . . . ?
Ru2 O10 Ru6 Ru9 163.19(5) . . . . ?
Ru7 O10 Ru6 Ru2 -139.81(13) . . . . ?
Ru4 O10 Ru6 Ru2 90.8(2) . . . . ?
Ru8 O10 Ru6 Ru2 -60.2(2) . . . . ?
Ru4 O10 Ru6 Ru7 -129.4(3) . . . . ?
Ru8 O10 Ru6 Ru7 79.6(2) . . . . ?
Ru2 O10 Ru6 Ru7 139.81(13) . . . . ?
C202 Ru2 Ru6 C602 -54.0(3) . . . . ?
C201 Ru2 Ru6 C602 32.0(3) . . . . ?
N1 Ru2 Ru6 C602 128.6(2) . . . . ?
O10 Ru2 Ru6 C602 -171.9(2) . . . . ?
Ru3 Ru2 Ru6 C602 59.7(2) . . . . ?
Ru1 Ru2 Ru6 C602 161.8(2) . . . . ?
Ru8 Ru2 Ru6 C602 -148.9(2) . . . . ?
C202 Ru2 Ru6 C601 -145.2(3) . . . . ?
C201 Ru2 Ru6 C601 -59.2(3) . . . . ?
N1 Ru2 Ru6 C601 37.4(2) . . . . ?
O10 Ru2 Ru6 C601 96.9(2) . . . . ?
Ru3 Ru2 Ru6 C601 -31.52(19) . . . . ?
Ru1 Ru2 Ru6 C601 70.62(19) . . . . ?
Ru8 Ru2 Ru6 C601 119.89(19) . . . . ?
C202 Ru2 Ru6 N3 43.7(2) . . . . ?
C201 Ru2 Ru6 N3 129.7(2) . . . . ?
N1 Ru2 Ru6 N3 -133.66(16) . . . . ?
O10 Ru2 Ru6 N3 -74.16(16) . . . . ?
Ru3 Ru2 Ru6 N3 157.38(13) . . . . ?
Ru1 Ru2 Ru6 N3 -100.47(12) . . . . ?
Ru8 Ru2 Ru6 N3 -51.21(12) . . . . ?
C202 Ru2 Ru6 O10 117.8(2) . . . . ?
C201 Ru2 Ru6 O10 -156.1(2) . . . . ?
N1 Ru2 Ru6 O10 -59.49(15) . . . . ?
Ru3 Ru2 Ru6 O10 -128.45(11) . . . . ?
Ru1 Ru2 Ru6 O10 -26.31(10) . . . . ?
Ru8 Ru2 Ru6 O10 22.95(10) . . . . ?
C202 Ru2 Ru6 Ru9 82.07(18) . . . . ?
C201 Ru2 Ru6 Ru9 168.1(2) . . . . ?
N1 Ru2 Ru6 Ru9 -95.26(12) . . . . ?
O10 Ru2 Ru6 Ru9 -35.77(11) . . . . ?
Ru3 Ru2 Ru6 Ru9 -164.22(4) . . . . ?
Ru1 Ru2 Ru6 Ru9 -62.08(5) . . . . ?
Ru8 Ru2 Ru6 Ru9 -12.82(4) . . . . ?
C202 Ru2 Ru6 Ru7 90.25(18) . . . . ?
C201 Ru2 Ru6 Ru7 176.3(2) . . . . ?
N1 Ru2 Ru6 Ru7 -87.08(11) . . . . ?
O10 Ru2 Ru6 Ru7 -27.58(10) . . . . ?
Ru3 Ru2 Ru6 Ru7 -156.04(4) . . . . ?
Ru1 Ru2 Ru6 Ru7 -53.90(2) . . . . ?
Ru8 Ru2 Ru6 Ru7 -4.634(15) . . . . ?
Ru5 C702 Ru7 O10 -70.71(17) . . . . ?
Ru5 C702 Ru7 N3 -155.0(4) . . . . ?
O702 C702 Ru7 Ru9 12(2) . . . . ?
Ru5 C702 Ru7 Ru9 -170.84(15) . . . . ?
O702 C702 Ru7 Ru5 -177(2) . . . . ?
O702 C702 Ru7 Ru6 62(2) . . . . ?
Ru5 C702 Ru7 Ru6 -120.97(11) . . . . ?
O702 C702 Ru7 Ru8 161(2) . . . . ?
Ru5 C702 Ru7 Ru8 -21.9(2) . . . . ?
Ru4 O10 Ru7 C701 -119.9(13) . . . . ?
Ru8 O10 Ru7 C701 -39.6(13) . . . . ?
Ru6 O10 Ru7 C701 102.5(13) . . . . ?
Ru2 O10 Ru7 C701 36.5(13) . . . . ?
Ru4 O10 Ru7 C702 30.2(3) . . . . ?
Ru8 O10 Ru7 C702 110.5(2) . . . . ?
Ru6 O10 Ru7 C702 -107.4(2) . . . . ?
Ru2 O10 Ru7 C702 -173.4(3) . . . . ?
Ru4 O10 Ru7 N3 -178.4(2) . . . . ?
Ru8 O10 Ru7 N3 -98.04(15) . . . . ?
Ru6 O10 Ru7 N3 44.04(14) . . . . ?
Ru2 O10 Ru7 N3 -22.0(2) . . . . ?
Ru4 O10 Ru7 Ru9 114.72(15) . . . . ?
Ru8 O10 Ru7 Ru9 -164.95(7) . . . . ?
Ru6 O10 Ru7 Ru9 -22.88(10) . . . . ?
Ru2 O10 Ru7 Ru9 -88.9(2) . . . . ?
Ru4 O10 Ru7 Ru5 -26.73(14) . . . . ?
Ru8 O10 Ru7 Ru5 53.59(8) . . . . ?
Ru6 O10 Ru7 Ru5 -164.33(9) . . . . ?
Ru2 O10 Ru7 Ru5 129.6(2) . . . . ?
Ru4 O10 Ru7 Ru6 137.6(2) . . . . ?
Ru8 O10 Ru7 Ru6 -142.08(15) . . . . ?
Ru2 O10 Ru7 Ru6 -66.03(19) . . . . ?
Ru4 O10 Ru7 Ru8 -80.32(16) . . . . ?
Ru6 O10 Ru7 Ru8 142.08(15) . . . . ?
Ru2 O10 Ru7 Ru8 76.0(2) . . . . ?
C11 N3 Ru7 C701 23.8(5) . . . . ?
Ru6 N3 Ru7 C701 144.4(2) . . . . ?
C11 N3 Ru7 C702 -75.1(7) . . . . ?
Ru6 N3 Ru7 C702 45.6(6) . . . . ?
C11 N3 Ru7 O10 -166.2(4) . . . . ?
Ru6 N3 Ru7 O10 -45.55(13) . . . . ?
C11 N3 Ru7 Ru9 -58.5(4) . . . . ?
Ru6 N3 Ru7 Ru9 62.13(10) . . . . ?
C11 N3 Ru7 Ru5 142.7(3) . . . . ?
Ru6 N3 Ru7 Ru5 -96.60(18) . . . . ?
C11 N3 Ru7 Ru6 -120.7(4) . . . . ?
C11 N3 Ru7 Ru8 146.9(4) . . . . ?
Ru6 N3 Ru7 Ru8 -92.43(11) . . . . ?
Ru8 Ru5 Ru7 C701 123.2(2) . . . . ?
Ru4 Ru5 Ru7 C701 -176.0(2) . . . . ?
C501 Ru5 Ru7 C702 -156.3(6) . . . . ?
C502 Ru5 Ru7 C702 112.4(3) . . . . ?
C503 Ru5 Ru7 C702 17.8(4) . . . . ?
Ru8 Ru5 Ru7 C702 -155.9(3) . . . . ?
Ru4 Ru5 Ru7 C702 -95.1(3) . . . . ?
C501 Ru5 Ru7 O10 -45.4(5) . . . . ?
C502 Ru5 Ru7 O10 -136.7(2) . . . . ?
C503 Ru5 Ru7 O10 128.7(3) . . . . ?
C702 Ru5 Ru7 O10 110.9(3) . . . . ?
Ru8 Ru5 Ru7 O10 -45.03(9) . . . . ?
Ru4 Ru5 Ru7 O10 15.78(9) . . . . ?
C501 Ru5 Ru7 N3 4.6(6) . . . . ?
C502 Ru5 Ru7 N3 -86.7(3) . . . . ?
C503 Ru5 Ru7 N3 178.7(3) . . . . ?
C702 Ru5 Ru7 N3 160.9(3) . . . . ?
Ru8 Ru5 Ru7 N3 4.97(19) . . . . ?
Ru4 Ru5 Ru7 N3 65.78(19) . . . . ?
C501 Ru5 Ru7 Ru9 -141.4(5) . . . . ?
C502 Ru5 Ru7 Ru9 127.3(2) . . . . ?
C503 Ru5 Ru7 Ru9 32.6(3) . . . . ?
C702 Ru5 Ru7 Ru9 14.9(3) . . . . ?
Ru8 Ru5 Ru7 Ru9 -141.04(3) . . . . ?
Ru4 Ru5 Ru7 Ru9 -80.23(3) . . . . ?
C501 Ru5 Ru7 Ru6 -60.0(5) . . . . ?
C502 Ru5 Ru7 Ru6 -151.3(2) . . . . ?
C503 Ru5 Ru7 Ru6 114.0(3) . . . . ?
C702 Ru5 Ru7 Ru6 96.3(3) . . . . ?
Ru8 Ru5 Ru7 Ru6 -59.64(2) . . . . ?
Ru4 Ru5 Ru7 Ru6 1.17(2) . . . . ?
C501 Ru5 Ru7 Ru8 -0.4(5) . . . . ?
C502 Ru5 Ru7 Ru8 -91.7(2) . . . . ?
C503 Ru5 Ru7 Ru8 173.7(3) . . . . ?
C702 Ru5 Ru7 Ru8 155.9(3) . . . . ?
Ru4 Ru5 Ru7 Ru8 60.809(13) . . . . ?
C602 Ru6 Ru7 C701 -3.2(4) . . . . ?
C601 Ru6 Ru7 C701 126.6(4) . . . . ?
N3 Ru6 Ru7 C701 -51.9(4) . . . . ?
O10 Ru6 Ru7 C701 -164.4(3) . . . . ?
Ru9 Ru6 Ru7 C701 42.6(3) . . . . ?
Ru2 Ru6 Ru7 C701 -132.8(3) . . . . ?
C602 Ru6 Ru7 C702 -110.3(4) . . . . ?
C601 Ru6 Ru7 C702 19.4(3) . . . . ?
N3 Ru6 Ru7 C702 -159.0(3) . . . . ?
O10 Ru6 Ru7 C702 88.4(3) . . . . ?
Ru9 Ru6 Ru7 C702 -64.6(2) . . . . ?
Ru2 Ru6 Ru7 C702 120.1(2) . . . . ?
C602 Ru6 Ru7 O10 161.2(3) . . . . ?
C601 Ru6 Ru7 O10 -69.0(2) . . . . ?
N3 Ru6 Ru7 O10 112.5(2) . . . . ?
Ru9 Ru6 Ru7 O10 -153.00(12) . . . . ?
Ru2 Ru6 Ru7 O10 31.62(12) . . . . ?
C602 Ru6 Ru7 N3 48.7(3) . . . . ?
C601 Ru6 Ru7 N3 178.4(3) . . . . ?
O10 Ru6 Ru7 N3 -112.5(2) . . . . ?
Ru9 Ru6 Ru7 N3 94.48(16) . . . . ?
Ru2 Ru6 Ru7 N3 -80.90(16) . . . . ?
C602 Ru6 Ru7 Ru9 -45.8(3) . . . . ?
C601 Ru6 Ru7 Ru9 84.0(2) . . . . ?
N3 Ru6 Ru7 Ru9 -94.48(16) . . . . ?
O10 Ru6 Ru7 Ru9 153.00(12) . . . . ?
Ru2 Ru6 Ru7 Ru9 -175.380(18) . . . . ?
C602 Ru6 Ru7 Ru5 -179.4(3) . . . . ?
C601 Ru6 Ru7 Ru5 -49.7(2) . . . . ?
N3 Ru6 Ru7 Ru5 131.87(16) . . . . ?
O10 Ru6 Ru7 Ru5 19.35(12) . . . . ?
Ru9 Ru6 Ru7 Ru5 -133.65(2) . . . . ?
Ru2 Ru6 Ru7 Ru5 50.97(2) . . . . ?
C602 Ru6 Ru7 Ru8 134.4(3) . . . . ?
C601 Ru6 Ru7 Ru8 -95.9(2) . . . . ?
N3 Ru6 Ru7 Ru8 85.64(16) . . . . ?
O10 Ru6 Ru7 Ru8 -26.88(12) . . . . ?
Ru9 Ru6 Ru7 Ru8 -179.878(19) . . . . ?
Ru2 Ru6 Ru7 Ru8 4.742(15) . . . . ?
Ru7 O10 Ru8 C802 40.9(2) . . . . ?
Ru4 O10 Ru8 C802 163.1(2) . . . . ?
Ru6 O10 Ru8 C802 -38.3(3) . . . . ?
Ru2 O10 Ru8 C802 -96.8(2) . . . . ?
Ru7 O10 Ru8 Ru5 -56.01(8) . . . . ?
Ru4 O10 Ru8 Ru5 66.19(8) . . . . ?
Ru6 O10 Ru8 Ru5 -135.1(3) . . . . ?
Ru2 O10 Ru8 Ru5 166.34(8) . . . . ?
Ru7 O10 Ru8 Ru4 -122.20(15) . . . . ?
Ru6 O10 Ru8 Ru4 158.7(3) . . . . ?
Ru2 O10 Ru8 Ru4 100.15(11) . . . . ?
Ru4 O10 Ru8 Ru7 122.20(15) . . . . ?
Ru6 O10 Ru8 Ru7 -79.1(2) . . . . ?
Ru2 O10 Ru8 Ru7 -137.66(14) . . . . ?
Ru7 O10 Ru8 Ru2 137.66(14) . . . . ?
Ru4 O10 Ru8 Ru2 -100.15(11) . . . . ?
Ru6 O10 Ru8 Ru2 58.5(2) . . . . ?
Ru7 O10 Ru8 Ru1 -174.91(9) . . . . ?
Ru4 O10 Ru8 Ru1 -52.71(8) . . . . ?
Ru6 O10 Ru8 Ru1 106.0(2) . . . . ?
Ru2 O10 Ru8 Ru1 47.44(6) . . . . ?
C501 Ru5 Ru8 C801 34.8(3) . . . . ?
C502 Ru5 Ru8 C801 -59.9(3) . . . . ?
C702 Ru5 Ru8 C801 -160.8(3) . . . . ?
Ru7 Ru5 Ru8 C801 -145.02(18) . . . . ?
Ru4 Ru5 Ru8 C801 124.14(18) . . . . ?
C501 Ru5 Ru8 C802 120.0(3) . . . . ?
C502 Ru5 Ru8 C802 25.3(3) . . . . ?
C702 Ru5 Ru8 Ru1 109.51(17) . . . . ?
Ru7 Ru5 Ru8 Ru1 125.262(19) . . . . ?
Ru4 Ru5 Ru8 Ru1 34.420(17) . . . . ?
C401 Ru4 Ru8 C801 7.6(4) . . . . ?
C402 Ru4 Ru8 C801 -144.8(4) . . . . ?
N1 Ru4 Ru8 C801 105.0(2) . . . . ?
O10 Ru4 Ru8 C801 -178.4(2) . . . . ?
Ru1 Ru4 Ru8 C801 66.7(2) . . . . ?
Ru5 Ru4 Ru8 C801 -78.6(2) . . . . ?
C401 Ru4 Ru8 C802 153.4(5) . . . . ?
C402 Ru4 Ru8 C802 1.0(5) . . . . ?
N1 Ru4 Ru8 C802 -109.2(4) . . . . ?
O10 Ru4 Ru8 C802 -32.6(4) . . . . ?
Ru1 Ru4 Ru8 C802 -147.5(4) . . . . ?
Ru5 Ru4 Ru8 C802 67.2(4) . . . . ?
C401 Ru4 Ru8 O10 -174.0(3) . . . . ?
C402 Ru4 Ru8 O10 33.6(4) . . . . ?
N1 Ru4 Ru8 O10 -76.62(17) . . . . ?
Ru1 Ru4 Ru8 O10 -114.94(12) . . . . ?
Ru5 Ru4 Ru8 O10 99.78(12) . . . . ?
C401 Ru4 Ru8 Ru5 86.2(3) . . . . ?
C402 Ru4 Ru8 Ru5 -66.2(3) . . . . ?
N1 Ru4 Ru8 Ru5 -176.40(12) . . . . ?
O10 Ru4 Ru8 Ru5 -99.78(12) . . . . ?
Ru1 Ru4 Ru8 Ru5 145.279(18) . . . . ?
C401 Ru4 Ru8 Ru7 147.9(3) . . . . ?
C402 Ru4 Ru8 Ru7 -4.4(3) . . . . ?
N1 Ru4 Ru8 Ru7 -114.67(12) . . . . ?
O10 Ru4 Ru8 Ru7 -38.05(12) . . . . ?
Ru1 Ru4 Ru8 Ru7 -152.989(16) . . . . ?
Ru5 Ru4 Ru8 Ru7 61.732(15) . . . . ?
C401 Ru4 Ru8 Ru2 -119.5(3) . . . . ?
C402 Ru4 Ru8 Ru2 88.1(3) . . . . ?
N1 Ru4 Ru8 Ru2 -22.11(12) . . . . ?
O10 Ru4 Ru8 Ru2 54.51(12) . . . . ?
Ru1 Ru4 Ru8 Ru2 -60.428(12) . . . . ?
Ru5 Ru4 Ru8 Ru2 154.292(17) . . . . ?
C401 Ru4 Ru8 Ru1 -59.1(3) . . . . ?
C402 Ru4 Ru8 Ru1 148.6(3) . . . . ?
N1 Ru4 Ru8 Ru1 38.32(12) . . . . ?
O10 Ru4 Ru8 Ru1 114.94(12) . . . . ?
Ru5 Ru4 Ru8 Ru1 -145.279(18) . . . . ?
C701 Ru7 Ru8 C801 -22.1(4) . . . . ?
C702 Ru7 Ru8 C801 81.0(4) . . . . ?
O10 Ru7 Ru8 C801 166.7(3) . . . . ?
N3 Ru7 Ru8 C801 -119.0(3) . . . . ?
Ru9 Ru7 Ru8 C801 -166.0(3) . . . . ?
Ru5 Ru7 Ru8 C801 58.0(3) . . . . ?
Ru6 Ru7 Ru8 C801 -165.8(3) . . . . ?
C701 Ru7 Ru8 C802 33.8(4) . . . . ?
C702 Ru7 Ru8 C802 136.9(3) . . . . ?
O10 Ru7 Ru8 C802 -137.3(2) . . . . ?
N3 Ru7 Ru8 C802 -63.0(2) . . . . ?
Ru9 Ru7 Ru8 C802 -110.1(2) . . . . ?
Ru5 Ru7 Ru8 C802 114.0(2) . . . . ?
Ru6 Ru7 Ru8 C802 -109.9(2) . . . . ?
C701 Ru7 Ru8 O10 171.2(3) . . . . ?
C702 Ru7 Ru8 O10 -85.8(3) . . . . ?
N3 Ru7 Ru8 O10 74.29(17) . . . . ?
Ru9 Ru7 Ru8 O10 27.26(13) . . . . ?
Ru5 Ru7 Ru8 O10 -108.71(12) . . . . ?
Ru6 Ru7 Ru8 O10 27.44(12) . . . . ?
C701 Ru7 Ru8 Ru5 -80.1(3) . . . . ?
C702 Ru7 Ru8 Ru5 22.9(2) . . . . ?
O10 Ru7 Ru8 Ru5 108.71(12) . . . . ?
N3 Ru7 Ru8 Ru5 -177.00(11) . . . . ?
Ru9 Ru7 Ru8 Ru5 135.97(4) . . . . ?
Ru6 Ru7 Ru8 Ru5 136.150(18) . . . . ?
C701 Ru7 Ru8 Ru4 -149.2(3) . . . . ?
C702 Ru7 Ru8 Ru4 -46.1(2) . . . . ?
O10 Ru7 Ru8 Ru4 39.62(12) . . . . ?
N3 Ru7 Ru8 Ru4 113.91(11) . . . . ?
Ru9 Ru7 Ru8 Ru4 66.88(3) . . . . ?
Ru5 Ru7 Ru8 Ru4 -69.086(16) . . . . ?
Ru6 Ru7 Ru8 Ru4 67.064(15) . . . . ?
C701 Ru7 Ru8 Ru2 139.2(3) . . . . ?
C702 Ru7 Ru8 Ru2 -117.7(2) . . . . ?
O10 Ru7 Ru8 Ru2 -31.95(12) . . . . ?
N3 Ru7 Ru8 Ru2 42.34(11) . . . . ?
Ru9 Ru7 Ru8 Ru2 -4.69(4) . . . . ?
Ru5 Ru7 Ru8 Ru2 -140.655(18) . . . . ?
Ru6 Ru7 Ru8 Ru2 -4.505(14) . . . . ?
C701 Ru7 Ru8 Ru1 178.1(3) . . . . ?
C702 Ru7 Ru8 Ru1 -78.9(2) . . . . ?
O10 Ru7 Ru8 Ru1 6.92(12) . . . . ?
N3 Ru7 Ru8 Ru1 81.20(12) . . . . ?
Ru9 Ru7 Ru8 Ru1 34.17(5) . . . . ?
Ru5 Ru7 Ru8 Ru1 -101.79(2) . . . . ?
Ru6 Ru7 Ru8 Ru1 34.36(3) . . . . ?
C202 Ru2 Ru8 C801 70.2(3) . . . . ?
C201 Ru2 Ru8 C801 170.7(6) . . . . ?
N1 Ru2 Ru8 C801 -96.0(3) . . . . ?
O10 Ru2 Ru8 C801 -167.7(3) . . . . ?
Ru3 Ru2 Ru8 C801 -27.6(2) . . . . ?
Ru1 Ru2 Ru8 C801 -50.5(2) . . . . ?
Ru6 Ru2 Ru8 C801 168.1(2) . . . . ?
C202 Ru2 Ru8 C802 -24.8(3) . . . . ?
C201 Ru2 Ru8 C802 75.6(6) . . . . ?
N1 Ru2 Ru8 C802 168.9(2) . . . . ?
O10 Ru2 Ru8 C802 97.2(2) . . . . ?
Ru3 Ru2 Ru8 C802 -122.66(18) . . . . ?
Ru1 Ru2 Ru8 C802 -145.56(18) . . . . ?
Ru6 Ru2 Ru8 C802 73.01(18) . . . . ?
C202 Ru2 Ru8 O10 -122.1(2) . . . . ?
C201 Ru2 Ru8 O10 -21.6(6) . . . . ?
N1 Ru2 Ru8 O10 71.70(16) . . . . ?
Ru3 Ru2 Ru8 O10 140.13(11) . . . . ?
Ru1 Ru2 Ru8 O10 117.23(11) . . . . ?
Ru6 Ru2 Ru8 O10 -24.20(11) . . . . ?
C202 Ru2 Ru8 Ru5 -140.17(18) . . . . ?
C201 Ru2 Ru8 Ru5 -39.7(6) . . . . ?
N1 Ru2 Ru8 Ru5 53.59(12) . . . . ?
O10 Ru2 Ru8 Ru5 -18.11(11) . . . . ?
Ru3 Ru2 Ru8 Ru5 122.02(3) . . . . ?
Ru1 Ru2 Ru8 Ru5 99.12(3) . . . . ?
Ru6 Ru2 Ru8 Ru5 -42.31(3) . . . . ?
C202 Ru2 Ru8 Ru4 -172.18(18) . . . . ?
C201 Ru2 Ru8 Ru4 -71.7(6) . . . . ?
N1 Ru2 Ru8 Ru4 21.58(12) . . . . ?
O10 Ru2 Ru8 Ru4 -50.12(11) . . . . ?
Ru3 Ru2 Ru8 Ru4 90.01(2) . . . . ?
Ru1 Ru2 Ru8 Ru4 67.106(14) . . . . ?
Ru6 Ru2 Ru8 Ru4 -74.320(15) . . . . ?
C202 Ru2 Ru8 Ru7 -93.25(18) . . . . ?
C201 Ru2 Ru8 Ru7 7.2(6) . . . . ?
N1 Ru2 Ru8 Ru7 100.52(12) . . . . ?
O10 Ru2 Ru8 Ru7 28.81(11) . . . . ?
Ru3 Ru2 Ru8 Ru7 168.940(19) . . . . ?
Ru1 Ru2 Ru8 Ru7 146.040(17) . . . . ?
Ru6 Ru2 Ru8 Ru7 4.614(14) . . . . ?
C202 Ru2 Ru8 Ru1 120.71(18) . . . . ?
C201 Ru2 Ru8 Ru1 -138.8(6) . . . . ?
N1 Ru2 Ru8 Ru1 -45.52(12) . . . . ?
O10 Ru2 Ru8 Ru1 -117.23(11) . . . . ?
Ru3 Ru2 Ru8 Ru1 22.900(18) . . . . ?
Ru6 Ru2 Ru8 Ru1 -141.426(17) . . . . ?
C101 Ru1 Ru8 C801 -77.4(4) . . . . ?
C102 Ru1 Ru8 C801 15.8(3) . . . . ?
N1 Ru1 Ru8 C801 -168.2(2) . . . . ?
Ru3 Ru1 Ru8 C801 121.39(19) . . . . ?
Ru2 Ru1 Ru8 C801 144.14(19) . . . . ?
Ru4 Ru1 Ru8 C801 -129.26(19) . . . . ?
C101 Ru1 Ru8 C802 -156.0(5) . . . . ?
C102 Ru1 Ru8 C802 -62.8(4) . . . . ?
N1 Ru1 Ru8 C802 113.2(3) . . . . ?
Ru3 Ru1 Ru8 C802 42.8(3) . . . . ?
Ru2 Ru1 Ru8 C802 65.6(3) . . . . ?
Ru4 Ru1 Ru8 C802 152.1(3) . . . . ?
C101 Ru1 Ru8 O10 94.1(4) . . . . ?
C102 Ru1 Ru8 O10 -172.7(2) . . . . ?
N1 Ru1 Ru8 O10 3.32(15) . . . . ?
Ru3 Ru1 Ru8 O10 -67.12(9) . . . . ?
Ru2 Ru1 Ru8 O10 -44.37(9) . . . . ?
Ru4 Ru1 Ru8 O10 42.23(9) . . . . ?
C101 Ru1 Ru8 Ru5 15.6(4) . . . . ?
C102 Ru1 Ru8 Ru5 108.73(19) . . . . ?
N1 Ru1 Ru8 Ru5 -75.20(12) . . . . ?
Ru3 Ru1 Ru8 Ru5 -145.64(2) . . . . ?
Ru2 Ru1 Ru8 Ru5 -122.89(2) . . . . ?
Ru4 Ru1 Ru8 Ru5 -36.294(18) . . . . ?
C101 Ru1 Ru8 Ru4 51.9(4) . . . . ?
C102 Ru1 Ru8 Ru4 145.03(19) . . . . ?
N1 Ru1 Ru8 Ru4 -38.90(12) . . . . ?
Ru3 Ru1 Ru8 Ru4 -109.35(2) . . . . ?
Ru2 Ru1 Ru8 Ru4 -86.596(15) . . . . ?
C101 Ru1 Ru8 Ru7 89.2(4) . . . . ?
C102 Ru1 Ru8 Ru7 -177.70(19) . . . . ?
N1 Ru1 Ru8 Ru7 -1.63(12) . . . . ?
Ru3 Ru1 Ru8 Ru7 -72.07(3) . . . . ?
Ru2 Ru1 Ru8 Ru7 -49.32(2) . . . . ?
Ru4 Ru1 Ru8 Ru7 37.28(2) . . . . ?
C101 Ru1 Ru8 Ru2 138.5(4) . . . . ?
C102 Ru1 Ru8 Ru2 -128.38(19) . . . . ?
N1 Ru1 Ru8 Ru2 47.69(12) . . . . ?
Ru3 Ru1 Ru8 Ru2 -22.750(17) . . . . ?
Ru4 Ru1 Ru8 Ru2 86.596(15) . . . . ?
C11 N4 Ru9 C902 125.0(4) . . . . ?
C15 N4 Ru9 C902 -46.8(6) . . . . ?
C11 N4 Ru9 C901 -136.5(5) . . . . ?
C15 N4 Ru9 C901 51.6(6) . . . . ?
C11 N4 Ru9 Ru6 26.3(4) . . . . ?
C15 N4 Ru9 Ru6 -145.6(6) . . . . ?
C11 N4 Ru9 Ru7 -37.8(4) . . . . ?
C15 N4 Ru9 Ru7 150.3(6) . . . . ?
C602 Ru6 Ru9 C903 -111.3(3) . . . . ?
C601 Ru6 Ru9 C903 -23.9(3) . . . . ?
N3 Ru6 Ru9 C903 148.3(3) . . . . ?
O10 Ru6 Ru9 C903 79.0(3) . . . . ?
Ru2 Ru6 Ru9 C903 107.9(2) . . . . ?
Ru7 Ru6 Ru9 C903 98.3(2) . . . . ?
C602 Ru6 Ru9 C902 -25.6(3) . . . . ?
C601 Ru6 Ru9 C902 61.8(3) . . . . ?
N3 Ru6 Ru9 C902 -125.9(3) . . . . ?
O10 Ru6 Ru9 C902 164.7(2) . . . . ?
Ru2 Ru6 Ru9 C902 -166.4(2) . . . . ?
Ru7 Ru6 Ru9 C902 -175.9(2) . . . . ?
C602 Ru6 Ru9 C901 157.6(8) . . . . ?
C601 Ru6 Ru9 C901 -115.0(8) . . . . ?
N3 Ru6 Ru9 C901 57.2(8) . . . . ?
O10 Ru6 Ru9 C901 -12.1(8) . . . . ?
Ru2 Ru6 Ru9 C901 16.8(8) . . . . ?
Ru7 Ru6 Ru9 C901 7.3(8) . . . . ?
C602 Ru6 Ru9 N4 64.9(2) . . . . ?
C601 Ru6 Ru9 N4 152.3(2) . . . . ?
N3 Ru6 Ru9 N4 -35.47(18) . . . . ?
O10 Ru6 Ru9 N4 -104.80(16) . . . . ?
Ru2 Ru6 Ru9 N4 -75.90(14) . . . . ?
Ru7 Ru6 Ru9 N4 -85.44(13) . . . . ?
C602 Ru6 Ru9 Ru7 150.3(2) . . . . ?
C601 Ru6 Ru9 Ru7 -122.29(18) . . . . ?
N3 Ru6 Ru9 Ru7 49.97(13) . . . . ?
O10 Ru6 Ru9 Ru7 -19.37(8) . . . . ?
Ru2 Ru6 Ru9 Ru7 9.54(4) . . . . ?
C701 Ru7 Ru9 C903 127.4(3) . . . . ?
C702 Ru7 Ru9 C903 39.6(3) . . . . ?
O10 Ru7 Ru9 C903 -62.1(2) . . . . ?
N3 Ru7 Ru9 C903 -132.7(3) . . . . ?
Ru5 Ru7 Ru9 C903 26.5(2) . . . . ?
Ru6 Ru7 Ru9 C903 -82.4(2) . . . . ?
Ru8 Ru7 Ru9 C903 -82.2(2) . . . . ?
C701 Ru7 Ru9 C902 -136.8(8) . . . . ?
C702 Ru7 Ru9 C902 135.3(8) . . . . ?
O10 Ru7 Ru9 C902 33.7(8) . . . . ?
N3 Ru7 Ru9 C902 -37.0(8) . . . . ?
Ru5 Ru7 Ru9 C902 122.2(8) . . . . ?
Ru6 Ru7 Ru9 C902 13.3(8) . . . . ?
Ru8 Ru7 Ru9 C902 13.6(8) . . . . ?
C701 Ru7 Ru9 C901 32.0(3) . . . . ?
C702 Ru7 Ru9 C901 -55.9(3) . . . . ?
O10 Ru7 Ru9 C901 -157.5(2) . . . . ?
N3 Ru7 Ru9 C901 131.9(3) . . . . ?
Ru5 Ru7 Ru9 C901 -69.0(2) . . . . ?
Ru6 Ru7 Ru9 C901 -177.8(2) . . . . ?
Ru8 Ru7 Ru9 C901 -177.6(2) . . . . ?
C701 Ru7 Ru9 N4 -61.6(3) . . . . ?
C702 Ru7 Ru9 N4 -149.4(3) . . . . ?
O10 Ru7 Ru9 N4 108.94(15) . . . . ?
N3 Ru7 Ru9 N4 38.31(17) . . . . ?
Ru5 Ru7 Ru9 N4 -162.52(13) . . . . ?
Ru6 Ru7 Ru9 N4 88.61(12) . . . . ?
Ru8 Ru7 Ru9 N4 88.83(13) . . . . ?
C701 Ru7 Ru9 Ru6 -150.2(2) . . . . ?
C702 Ru7 Ru9 Ru6 122.0(2) . . . . ?
O10 Ru7 Ru9 Ru6 20.33(9) . . . . ?
N3 Ru7 Ru9 Ru6 -50.30(12) . . . . ?
Ru5 Ru7 Ru9 Ru6 108.87(3) . . . . ?
Ru8 Ru7 Ru9 Ru6 0.22(3) . . . . ?
 
_diffrn_measured_fraction_theta_max    0.970
_diffrn_reflns_theta_full              70.10
_diffrn_measured_fraction_theta_full   0.970
_refine_diff_density_max    1.265
_refine_diff_density_min   -1.109
_refine_diff_density_rms    0.163

#===END

data_5_(pg106am)
 
_audit_creation_method            SHELXL-97
_chemical_name_systematic
;
 ?
;
_chemical_name_common             ?
_chemical_melting_point           ?
_chemical_formula_moiety          
'C39 H20 N6 O23 Ru9'
_chemical_formula_sum
 'C39 H20 N6 O23 Ru9'
_chemical_formula_weight          1850.24
_chemical_compound_source
;
Synthesis. Crystallization from a CH~2~Cl~2~/
hexanes solution 
at room temperature by slow liquid-liquid difussion.
;
 
loop_
 _atom_type_symbol
 _atom_type_description
 _atom_type_scat_dispersion_real
 _atom_type_scat_dispersion_imag
 _atom_type_scat_source
 'C'  'C'   0.0033   0.0016
 'International Tables Vol C Tables 4.2.6.8 and 6.1.1.4'
 'H'  'H'   0.0000   0.0000
 'International Tables Vol C Tables 4.2.6.8 and 6.1.1.4'
 'N'  'N'   0.0061   0.0033
 'International Tables Vol C Tables 4.2.6.8 and 6.1.1.4'
 'O'  'O'   0.0106   0.0060
 'International Tables Vol C Tables 4.2.6.8 and 6.1.1.4'
 'Ru'  'Ru'  -1.2594   0.8363
 'International Tables Vol C Tables 4.2.6.8 and 6.1.1.4'
 
_symmetry_cell_setting            Monoclinic 
_symmetry_space_group_name_H-M    P2(1)/c 
_symmetry_space_group_name_Hall    '-P 2ybc' 
 
loop_
 _symmetry_equiv_pos_as_xyz
 'x, y, z'
 '-x, y+1/2, -z+1/2'
 '-x, -y, -z'
 'x, -y-1/2, z-1/2'
 
_cell_length_a                    15.632(7)
_cell_length_b                    14.108(6)
_cell_length_c                    24.727(11)
_cell_angle_alpha                 90.00
_cell_angle_beta                  106.252(7)
_cell_angle_gamma                 90.00
_cell_volume                      5235(4)
_cell_formula_units_Z             4
_cell_measurement_temperature     296(2)
_cell_measurement_reflns_used     ?
_cell_measurement_theta_min       ?
_cell_measurement_theta_max       ?
 
_exptl_crystal_description        BLOCK 
_exptl_crystal_colour             BLACK 
_exptl_crystal_size_max           0.40 
_exptl_crystal_size_mid           0.31 
_exptl_crystal_size_min           0.25 
_exptl_crystal_density_meas       ? 
_exptl_crystal_density_diffrn     2.337 
_exptl_crystal_density_method     'not measured' 
_exptl_crystal_F_000              3504 
_exptl_absorpt_coefficient_mu     2.601 
_exptl_absorpt_correction_type    empirical 
_exptl_absorpt_correction_T_min   0.391 
_exptl_absorpt_correction_T_max   0.520 
_exptl_absorpt_process_details    
;
Sheldrick, G. M. SADABS, Empirical Absorption 
Correction Program; University of Gottingen, 
Gottingen, Germany, 1997.
; 
_exptl_special_details
;
 ?
;
 
_diffrn_ambient_temperature       296(2) 
_diffrn_radiation_wavelength      0.71073 
_diffrn_radiation_type            MoK\a 
_diffrn_radiation_source          'fine-focus sealed tube' 
_diffrn_radiation_monochromator   graphite 
_diffrn_measurement_device_type   'CCD area detector' 
_diffrn_measurement_method        'phi and omega scans' 
_diffrn_detector_area_resol_mean  ?
_diffrn_standards_number          ?
_diffrn_standards_interval_count  ?
_diffrn_standards_interval_time   ?
_diffrn_standards_decay_%         ?
_diffrn_reflns_number             22670
_diffrn_reflns_av_R_equivalents   0.0363
_diffrn_reflns_av_sigmaI/netI     0.0256
_diffrn_reflns_limit_h_min        -17
_diffrn_reflns_limit_h_max        17
_diffrn_reflns_limit_k_min        -12
_diffrn_reflns_limit_k_max        15
_diffrn_reflns_limit_l_min        -25
_diffrn_reflns_limit_l_max        27
_diffrn_reflns_theta_min          1.68
_diffrn_reflns_theta_max          23.33
_reflns_number_total              7509
_reflns_number_gt                 6133
_reflns_threshold_expression      >2sigma(I)
 
_computing_data_collection        'Bruker SMART' 
_computing_cell_refinement        'Bruker SMART' 
_computing_data_reduction         'Bruker SHELXTL' 
_computing_structure_solution     'SHELXS-97 (Sheldrick, 1990)' 
_computing_structure_refinement   'SHELXL-97 (Sheldrick, 1997)' 
_computing_molecular_graphics     'Bruker SHELXTL' 
_computing_publication_material   'Bruker SHELXTL' 
 
_refine_special_details
;
 Refinement of F^2^ against ALL reflections.  The weighted R-factor wR and
 goodness of fit S are based on F^2^, conventional R-factors R are based
 on F, with F set to zero for negative F^2^. The threshold expression of
 F^2^ > 2sigma(F^2^) is used only for calculating R-factors(gt) etc. and is
 not relevant to the choice of reflections for refinement.  R-factors based
 on F^2^ are statistically about twice as large as those based on F, and R-
 factors based on ALL data will be even larger.
;
 
_refine_ls_structure_factor_coef  Fsqd
_refine_ls_matrix_type            full
_refine_ls_weighting_scheme       calc
_refine_ls_weighting_details
; calc
 [1.00000+-1.00000exp(-5.70(sin\q/\l)^2^)]/
   [\s^2^(Fo^2^)+0.0000+68.4038*P+(0.0065P)^2^+0.0000sin\q/\l]
 where P = 0.33333Fo^2^ + 0.66667Fc^2^
;
_atom_sites_solution_primary      direct
_atom_sites_solution_secondary    difmap
_atom_sites_solution_hydrogens    geom
_refine_ls_hydrogen_treatment     constr
_refine_ls_extinction_method      SHELXL
_refine_ls_extinction_coef        0.00089(8)
_refine_ls_extinction_expression
 'Fc^*^=kFc[1+0.001xFc^2^\l^3^/sin(2\q)]^-1/4^'
_refine_ls_number_reflns          7509
_refine_ls_number_parameters      698
_refine_ls_number_restraints      0
_refine_ls_R_factor_all           0.0625
_refine_ls_R_factor_gt            0.0468
_refine_ls_wR_factor_ref          0.1252
_refine_ls_wR_factor_gt           0.1091
_refine_ls_goodness_of_fit_ref    1.009
_refine_ls_restrained_S_all       1.009
_refine_ls_shift/su_max           0.001
_refine_ls_shift/su_mean          0.000
 
loop_
 _atom_site_label
 _atom_site_type_symbol
 _atom_site_fract_x
 _atom_site_fract_y
 _atom_site_fract_z
 _atom_site_U_iso_or_equiv
 _atom_site_adp_type
 _atom_site_occupancy
 _atom_site_symmetry_multiplicity
 _atom_site_calc_flag
 _atom_site_refinement_flags
 _atom_site_disorder_assembly
 _atom_site_disorder_group
Ru1 Ru 0.70729(5) 0.68344(6) 0.44246(3) 0.0342(2) Uani 1 1 d . . .
Ru2 Ru 0.71983(5) 0.75079(6) 0.33176(3) 0.0331(2) Uani 1 1 d . . .
Ru3 Ru 0.70123(7) 0.56533(6) 0.35538(4) 0.0462(3) Uani 1 1 d . . .
Ru4 Ru 0.81028(5) 0.85693(5) 0.44324(3) 0.0307(2) Uani 1 1 d . . .
Ru5 Ru 0.57397(6) 0.82649(7) 0.44910(4) 0.0398(2) Uani 1 1 d . . .
Ru6 Ru 0.83044(6) 0.89128(6) 0.29311(3) 0.0363(2) Uani 1 1 d . . .
Ru7 Ru 0.76023(6) 1.05850(6) 0.32805(3) 0.0368(2) Uani 1 1 d . . .
Ru8 Ru 0.63882(6) 0.96565(6) 0.38305(3) 0.0367(2) Uani 1 1 d . . .
Ru9 Ru 0.88326(7) 1.06737(7) 0.27067(4) 0.0483(3) Uani 1 1 d . . .
O10 O 0.7748(4) 0.9166(5) 0.3623(3) 0.0315(14) Uani 1 1 d . . .
O20 O 0.6749(4) 0.8162(5) 0.4048(3) 0.0328(14) Uani 1 1 d . . .
C101 C 0.7633(8) 0.5853(9) 0.4892(6) 0.049(3) Uani 1 1 d . . .
O101 O 0.7967(8) 0.5271(8) 0.5178(5) 0.085(4) Uani 1 1 d . . .
C102 C 0.6081(8) 0.6356(9) 0.4619(4) 0.045(3) Uani 1 1 d . . .
O102 O 0.5542(7) 0.5903(8) 0.4723(4) 0.071(3) Uani 1 1 d . . .
C201 C 0.7768(7) 0.6967(8) 0.2846(5) 0.041(2) Uani 1 1 d . . .
O201 O 0.8170(7) 0.6559(6) 0.2577(4) 0.063(2) Uani 1 1 d . . .
C202 C 0.6226(9) 0.7631(9) 0.2672(5) 0.053(3) Uani 1 1 d . . .
O202 O 0.5655(7) 0.7605(10) 0.2256(4) 0.086(3) Uani 1 1 d . . .
C301 C 0.7036(9) 0.5046(9) 0.2867(6) 0.055(3) Uani 1 1 d . . .
O301 O 0.7036(9) 0.4686(8) 0.2459(5) 0.085(3) Uani 1 1 d . . .
C302 C 0.6782(12) 0.4527(11) 0.3909(7) 0.074(4) Uani 1 1 d . . .
O302 O 0.6571(15) 0.3875(11) 0.4117(8) 0.140(7) Uani 1 1 d . . .
C303 C 0.5800(11) 0.5893(10) 0.3263(5) 0.060(4) Uani 1 1 d . . .
O303 O 0.5041(8) 0.6074(10) 0.3074(5) 0.088(3) Uani 1 1 d . . .
C401 C 0.8408(8) 0.8049(8) 0.5163(5) 0.045(3) Uani 1 1 d . . .
O401 O 0.8693(6) 0.7756(7) 0.5615(3) 0.060(2) Uani 1 1 d . . .
C402 C 0.9286(8) 0.8978(8) 0.4609(4) 0.045(3) Uani 1 1 d . . .
O402 O 1.0025(6) 0.9169(8) 0.4684(5) 0.070(3) Uani 1 1 d . . .
C802 C 0.5387(8) 0.9626(9) 0.4212(5) 0.051(3) Uani 1 1 d . . .
O802 O 0.4812(8) 1.0109(8) 0.4245(5) 0.082(3) Uani 1 1 d . . .
C501 C 0.4846(9) 0.8235(11) 0.4854(5) 0.059(3) Uani 1 1 d . . .
O501 O 0.4245(8) 0.8227(11) 0.5031(5) 0.089(4) Uani 1 1 d . . .
C502 C 0.4830(9) 0.7827(11) 0.3863(5) 0.059(3) Uani 1 1 d . . .
O502 O 0.4229(8) 0.7612(10) 0.3510(5) 0.091(3) Uani 1 1 d . . .
C601 C 0.9424(8) 0.8446(9) 0.3304(5) 0.049(3) Uani 1 1 d . . .
O601 O 1.0125(7) 0.8161(9) 0.3523(5) 0.081(3) Uani 1 1 d . . .
C602 C 0.8556(9) 0.8572(9) 0.2261(5) 0.054(3) Uani 1 1 d . . .
O602 O 0.8649(8) 0.8358(9) 0.1835(4) 0.080(3) Uani 1 1 d . . .
C701 C 0.7206(10) 1.1747(9) 0.2942(5) 0.057(3) Uani 1 1 d . . .
O701 O 0.6985(9) 1.2456(8) 0.2738(5) 0.087(3) Uani 1 1 d . . .
C702 C 0.8211(9) 1.1277(8) 0.3908(5) 0.050(3) Uani 1 1 d . . .
O702 O 0.8616(8) 1.1711(8) 0.4290(4) 0.081(3) Uani 1 1 d . . .
C801 C 0.6179(8) 1.0960(10) 0.3736(5) 0.051(3) Uani 1 1 d . . .
O801 O 0.5946(8) 1.1746(7) 0.3732(5) 0.078(3) Uani 1 1 d . . .
C803 C 0.5506(7) 0.9501(9) 0.3138(5) 0.048(3) Uani 1 1 d . . .
O803 O 0.4951(7) 0.9424(9) 0.2726(4) 0.079(3) Uani 1 1 d . . .
C901 C 0.9033(12) 1.2011(12) 0.2678(7) 0.078(5) Uani 1 1 d . . .
O901 O 0.9195(13) 1.2799(9) 0.2669(7) 0.124(6) Uani 1 1 d . . .
C902 C 0.9717(9) 1.0313(10) 0.2345(6) 0.061(3) Uani 1 1 d . . .
O902 O 1.0260(10) 1.0073(11) 0.2152(7) 0.110(5) Uani 1 1 d . . .
C903 C 0.9682(10) 1.0587(10) 0.3414(7) 0.062(3) Uani 1 1 d . . .
O903 O 1.0195(8) 1.0576(11) 0.3834(6) 0.095(4) Uani 1 1 d . . .
N1 N 0.8148(6) 0.7245(6) 0.4073(3) 0.0336(18) Uani 1 1 d . . .
N2 N 0.8473(6) 0.5679(6) 0.3913(4) 0.042(2) Uani 1 1 d . . .
N3 N 0.7118(6) 0.9687(7) 0.2561(4) 0.045(2) Uani 1 1 d . . .
H3 H 0.6628 0.9359 0.2583 0.054 Uiso 1 1 d R . .
N4 N 0.7684(7) 1.0603(7) 0.1940(4) 0.048(2) Uani 1 1 d . . .
N5 N 0.7386(6) 0.9785(6) 0.4617(4) 0.042(2) Uani 1 1 d . . .
H5 H 0.7711 1.0319 0.4616 0.051 Uiso 1 1 d R . .
N6 N 0.6740(6) 0.8906(7) 0.5224(3) 0.042(2) Uani 1 1 d . . .
C1 C 0.8793(7) 0.6544(8) 0.4138(4) 0.040(2) Uani 1 1 d . . .
C2 C 0.9669(7) 0.6681(9) 0.4445(5) 0.050(3) Uani 1 1 d . . .
H2 H 0.9866 0.7261 0.4613 0.060 Uiso 1 1 calc R . .
C3 C 1.0244(8) 0.5916(10) 0.4494(6) 0.057(3) Uani 1 1 d . . .
H3A H 1.0840 0.5983 0.4695 0.069 Uiso 1 1 calc R . .
C4 C 0.9938(12) 0.5052(10) 0.4247(6) 0.069(4) Uani 1 1 d . . .
H4 H 1.0330 0.4550 0.4262 0.083 Uiso 1 1 calc R . .
C5 C 0.9068(10) 0.4954(9) 0.3985(5) 0.057(3) Uani 1 1 d . . .
C6 C 0.8734(14) 0.3998(10) 0.3726(9) 0.090(6) Uani 1 1 d . . .
H6A H 0.9232 0.3608 0.3716 0.134 Uiso 1 1 calc R . .
H6B H 0.8358 0.4090 0.3350 0.134 Uiso 1 1 calc R . .
H6C H 0.8400 0.3693 0.3949 0.134 Uiso 1 1 calc R . .
C11 C 0.7017(8) 1.0024(9) 0.2003(5) 0.049(3) Uani 1 1 d . . .
C12 C 0.6303(9) 0.9731(10) 0.1550(5) 0.053(3) Uani 1 1 d . . .
H12 H 0.5876 0.9310 0.1604 0.064 Uiso 1 1 calc R . .
C13 C 0.6256(14) 1.0085(13) 0.1028(6) 0.080(5) Uani 1 1 d . . .
H13 H 0.5797 0.9899 0.0717 0.096 Uiso 1 1 calc R . .
C14 C 0.6877(14) 1.0702(14) 0.0966(6) 0.078(5) Uani 1 1 d . . .
H14 H 0.6828 1.0954 0.0610 0.093 Uiso 1 1 calc R . .
C15 C 0.7588(12) 1.0976(10) 0.1413(6) 0.068(4) Uani 1 1 d . . .
C16 C 0.8285(17) 1.1689(17) 0.1349(8) 0.110(7) Uani 1 1 d . . .
H16A H 0.8331 1.2192 0.1617 0.164 Uiso 1 1 calc R . .
H16B H 0.8111 1.1946 0.0974 0.164 Uiso 1 1 calc R . .
H16C H 0.8851 1.1378 0.1414 0.164 Uiso 1 1 calc R . .
C21 C 0.7237(8) 0.9676(8) 0.5155(4) 0.042(3) Uani 1 1 d . . .
C22 C 0.7663(10) 1.0266(10) 0.5594(5) 0.059(3) Uani 1 1 d . . .
H22 H 0.7965 1.0802 0.5527 0.071 Uiso 1 1 calc R . .
C23 C 0.7633(12) 1.0048(13) 0.6132(6) 0.077(4) Uani 1 1 d . . .
H23 H 0.7900 1.0444 0.6432 0.093 Uiso 1 1 calc R . .
C24 C 0.7208(12) 0.9246(14) 0.6216(5) 0.078(5) Uani 1 1 d . . .
H24 H 0.7209 0.9083 0.6581 0.094 Uiso 1 1 calc R . .
C25 C 0.6772(9) 0.8664(10) 0.5774(5) 0.056(3) Uani 1 1 d . . .
C26 C 0.6368(9) 0.7764(11) 0.5884(5) 0.063(4) Uani 1 1 d . . .
H26A H 0.5737 0.7846 0.5814 0.094 Uiso 1 1 calc R . .
H26B H 0.6624 0.7581 0.6270 0.094 Uiso 1 1 calc R . .
H26C H 0.6481 0.7279 0.5640 0.094 Uiso 1 1 calc R . .
 
loop_
 _atom_site_aniso_label
 _atom_site_aniso_U_11
 _atom_site_aniso_U_22
 _atom_site_aniso_U_33
 _atom_site_aniso_U_23
 _atom_site_aniso_U_13
 _atom_site_aniso_U_12
Ru1 0.0405(5) 0.0314(4) 0.0333(4) 0.0019(3) 0.0147(3) 0.0015(3)
Ru2 0.0386(4) 0.0310(4) 0.0302(4) -0.0033(3) 0.0105(3) -0.0033(3)
Ru3 0.0666(6) 0.0320(5) 0.0457(5) -0.0080(4) 0.0250(4) -0.0124(4)
Ru4 0.0345(4) 0.0288(4) 0.0287(4) -0.0025(3) 0.0085(3) 0.0035(3)
Ru5 0.0388(5) 0.0466(5) 0.0378(5) 0.0069(4) 0.0170(4) 0.0073(4)
Ru6 0.0416(5) 0.0327(4) 0.0385(4) -0.0037(3) 0.0175(4) -0.0023(4)
Ru7 0.0470(5) 0.0309(4) 0.0343(4) 0.0005(3) 0.0146(4) 0.0013(4)
Ru8 0.0397(5) 0.0361(5) 0.0359(4) 0.0073(3) 0.0134(3) 0.0111(4)
Ru9 0.0578(6) 0.0405(5) 0.0552(6) -0.0053(4) 0.0298(5) -0.0125(4)
O10 0.037(3) 0.030(3) 0.032(3) 0.000(3) 0.017(3) 0.005(3)
O20 0.032(3) 0.035(4) 0.026(3) 0.002(3) 0.000(3) 0.004(3)
C101 0.048(6) 0.039(6) 0.069(8) 0.017(6) 0.029(6) 0.022(5)
O101 0.084(7) 0.074(7) 0.111(9) 0.054(7) 0.047(6) 0.042(6)
C102 0.046(6) 0.055(7) 0.035(5) 0.012(5) 0.012(5) -0.001(6)
O102 0.063(6) 0.076(7) 0.078(6) 0.019(5) 0.024(5) -0.024(5)
C201 0.039(6) 0.031(5) 0.052(6) 0.003(5) 0.011(5) -0.003(5)
O201 0.097(7) 0.041(5) 0.066(5) -0.015(4) 0.048(5) -0.002(5)
C202 0.057(7) 0.056(7) 0.049(7) -0.003(6) 0.019(6) -0.018(6)
O202 0.070(6) 0.118(9) 0.048(5) -0.007(6) -0.023(5) -0.028(6)
C301 0.071(8) 0.036(6) 0.059(8) -0.010(6) 0.022(6) -0.003(6)
O301 0.126(10) 0.069(7) 0.072(7) -0.030(6) 0.045(7) -0.019(6)
C302 0.105(12) 0.052(8) 0.075(9) -0.011(7) 0.043(9) -0.026(8)
O302 0.23(2) 0.071(9) 0.152(14) 0.005(9) 0.098(14) -0.051(11)
C303 0.087(11) 0.052(8) 0.048(7) -0.019(6) 0.029(7) -0.029(7)
O303 0.060(7) 0.108(9) 0.095(8) -0.029(7) 0.019(6) -0.036(6)
C401 0.055(7) 0.040(6) 0.041(7) -0.003(5) 0.013(5) 0.007(5)
O401 0.068(5) 0.067(6) 0.035(4) 0.004(4) -0.004(4) -0.007(5)
C402 0.045(7) 0.046(6) 0.035(5) -0.005(5) -0.004(5) 0.006(5)
O402 0.042(5) 0.077(7) 0.088(7) -0.022(5) 0.016(5) -0.016(5)
C802 0.048(7) 0.050(7) 0.043(6) 0.015(5) -0.008(5) 0.018(6)
O802 0.080(7) 0.075(7) 0.111(8) 0.029(6) 0.061(6) 0.044(6)
C501 0.056(7) 0.074(9) 0.050(7) 0.016(6) 0.022(6) 0.001(7)
O501 0.084(7) 0.131(11) 0.071(6) 0.021(7) 0.051(6) 0.003(7)
C502 0.059(8) 0.079(9) 0.039(6) 0.002(6) 0.013(6) -0.009(7)
O502 0.066(6) 0.109(9) 0.081(7) -0.002(7) -0.006(6) -0.015(6)
C601 0.050(7) 0.054(7) 0.042(6) -0.010(5) 0.012(5) -0.003(6)
O601 0.053(6) 0.109(9) 0.077(7) 0.003(6) 0.010(5) 0.032(6)
C602 0.061(7) 0.053(7) 0.048(7) -0.010(6) 0.017(6) -0.012(6)
O602 0.117(9) 0.091(8) 0.047(5) -0.022(5) 0.046(6) -0.010(7)
C701 0.089(9) 0.041(7) 0.046(6) -0.003(6) 0.028(6) -0.013(7)
O701 0.122(9) 0.047(6) 0.085(7) 0.027(6) 0.018(7) 0.010(6)
C702 0.077(8) 0.034(6) 0.039(6) -0.001(5) 0.019(6) -0.013(6)
O702 0.108(8) 0.060(6) 0.062(6) -0.014(5) 0.003(6) -0.006(6)
C801 0.052(7) 0.060(8) 0.047(6) 0.004(6) 0.025(5) 0.003(6)
O801 0.113(8) 0.047(6) 0.089(7) 0.022(5) 0.055(6) 0.038(6)
C803 0.033(6) 0.065(8) 0.053(7) 0.017(6) 0.021(6) 0.018(5)
O803 0.053(5) 0.106(9) 0.064(6) 0.021(6) -0.010(5) 0.021(6)
C901 0.102(12) 0.062(10) 0.091(11) -0.004(8) 0.064(10) -0.018(9)
O901 0.204(17) 0.049(7) 0.162(14) -0.018(7) 0.122(13) -0.042(9)
C902 0.062(8) 0.055(8) 0.081(9) -0.015(7) 0.046(7) -0.013(6)
O902 0.106(9) 0.110(10) 0.145(12) -0.021(9) 0.088(10) -0.002(8)
C903 0.056(8) 0.056(8) 0.071(9) -0.014(7) 0.011(7) -0.006(6)
O903 0.072(7) 0.116(10) 0.084(8) -0.014(7) 0.000(6) -0.034(7)
N1 0.040(5) 0.035(5) 0.026(4) 0.001(3) 0.010(3) 0.009(4)
N2 0.046(5) 0.034(5) 0.051(5) 0.003(4) 0.023(4) 0.012(4)
N3 0.052(5) 0.047(5) 0.040(5) -0.003(4) 0.022(4) -0.012(4)
N4 0.060(6) 0.053(6) 0.036(5) 0.006(4) 0.020(4) 0.011(5)
N5 0.055(5) 0.025(4) 0.051(5) 0.004(4) 0.020(4) 0.009(4)
N6 0.047(5) 0.056(6) 0.028(4) -0.001(4) 0.018(4) 0.023(5)
C1 0.047(6) 0.038(6) 0.038(5) 0.008(5) 0.019(5) 0.005(5)
C2 0.038(6) 0.053(7) 0.058(7) 0.000(6) 0.013(5) 0.018(5)
C3 0.041(6) 0.060(8) 0.067(8) 0.008(6) 0.010(6) 0.031(6)
C4 0.104(12) 0.045(8) 0.068(8) 0.026(7) 0.042(9) 0.050(8)
C5 0.082(10) 0.048(7) 0.049(7) 0.011(6) 0.029(7) 0.032(7)
C6 0.126(15) 0.037(7) 0.126(15) -0.007(8) 0.070(13) 0.018(8)
C11 0.049(6) 0.053(7) 0.051(7) 0.002(5) 0.025(5) 0.016(6)
C12 0.062(7) 0.058(7) 0.033(6) -0.013(5) 0.003(5) 0.015(6)
C13 0.108(13) 0.080(11) 0.048(8) 0.002(7) 0.015(8) 0.053(11)
C14 0.110(13) 0.085(11) 0.040(7) 0.016(7) 0.022(8) 0.041(11)
C15 0.110(12) 0.057(8) 0.055(8) 0.017(7) 0.050(9) 0.020(8)
C16 0.151(19) 0.116(16) 0.077(11) 0.034(11) 0.057(12) -0.020(14)
C21 0.050(6) 0.040(6) 0.038(6) 0.009(5) 0.013(5) 0.019(5)
C22 0.085(9) 0.058(8) 0.033(6) -0.016(5) 0.013(6) -0.003(7)
C23 0.094(11) 0.082(11) 0.054(8) -0.017(8) 0.017(8) -0.005(9)
C24 0.098(11) 0.109(14) 0.028(6) -0.004(7) 0.017(7) 0.034(11)
C25 0.068(8) 0.065(8) 0.039(6) 0.011(6) 0.025(6) 0.031(7)
C26 0.065(8) 0.088(10) 0.038(6) 0.019(6) 0.020(6) 0.024(7)
 
_geom_special_details
;
 All esds (except the esd in the dihedral angle between two l.s. planes)
 are estimated using the full covariance matrix.  The cell esds are taken
 into account individually in the estimation of esds in distances, angles
 and torsion angles; correlations between esds in cell parameters are only
 used when they are defined by crystal symmetry.  An approximate (isotropic)
 treatment of cell esds is used for estimating esds involving l.s. planes.
;
 
loop_
 _geom_bond_atom_site_label_1
 _geom_bond_atom_site_label_2
 _geom_bond_distance
 _geom_bond_site_symmetry_2
 _geom_bond_publ_flag
Ru1 C101 1.858(12) . ?
Ru1 C102 1.872(12) . ?
Ru1 O20 2.089(7) . ?
Ru1 N1 2.175(8) . ?
Ru1 Ru3 2.7031(14) . ?
Ru1 Ru4 2.9268(15) . ?
Ru1 Ru5 2.9386(15) . ?
Ru1 Ru2 2.9554(16) . ?
Ru2 C201 1.821(12) . ?
Ru2 C202 1.879(13) . ?
Ru2 N1 2.069(8) . ?
Ru2 O20 2.306(7) . ?
Ru2 Ru3 2.7141(16) . ?
Ru2 Ru6 2.9593(14) . ?
Ru2 Ru4 3.1080(14) . ?
Ru3 C303 1.859(18) . ?
Ru3 C302 1.899(15) . ?
Ru3 C301 1.912(13) . ?
Ru3 N2 2.206(9) . ?
Ru4 C402 1.869(12) . ?
Ru4 C401 1.883(12) . ?
Ru4 N1 2.079(8) . ?
Ru4 O10 2.098(6) . ?
Ru4 O20 2.142(6) . ?
Ru4 N5 2.167(9) . ?
Ru4 Ru8 3.0853(14) . ?
Ru5 C501 1.860(13) . ?
Ru5 C502 1.892(14) . ?
Ru5 C802 2.063(12) . ?
Ru5 O20 2.162(7) . ?
Ru5 N6 2.228(10) . ?
Ru5 Ru8 2.9113(14) . ?
Ru6 C601 1.855(13) . ?
Ru6 C602 1.870(13) . ?
Ru6 N3 2.126(10) . ?
Ru6 O10 2.155(6) . ?
Ru6 Ru9 2.7235(16) . ?
Ru6 Ru7 2.8368(14) . ?
Ru7 C702 1.855(12) . ?
Ru7 C701 1.866(14) . ?
Ru7 N3 2.142(9) . ?
Ru7 O10 2.160(7) . ?
Ru7 Ru9 2.6935(15) . ?
Ru7 Ru8 2.9347(14) . ?
Ru8 C801 1.871(14) . ?
Ru8 C803 1.887(13) . ?
Ru8 C802 2.043(17) . ?
Ru8 N5 2.133(10) . ?
Ru8 O20 2.210(7) . ?
Ru8 O10 2.423(6) . ?
Ru9 C903 1.881(16) . ?
Ru9 C902 1.913(12) . ?
Ru9 C901 1.917(17) . ?
Ru9 N4 2.219(10) . ?
C101 O101 1.114(15) . ?
C102 O102 1.143(15) . ?
C201 O201 1.184(14) . ?
C202 O202 1.158(16) . ?
C301 O301 1.130(16) . ?
C302 O302 1.15(2) . ?
C303 O303 1.176(19) . ?
C401 O401 1.159(14) . ?
C402 O402 1.149(15) . ?
C802 O802 1.148(15) . ?
C501 O501 1.143(16) . ?
C502 O502 1.130(16) . ?
C601 O601 1.151(15) . ?
C602 O602 1.144(15) . ?
C701 O701 1.130(17) . ?
C702 O702 1.155(15) . ?
C801 O801 1.166(16) . ?
C803 O803 1.143(15) . ?
C901 O901 1.142(19) . ?
C902 O902 1.135(17) . ?
C903 O903 1.120(18) . ?
N1 C1 1.389(14) . ?
N2 C5 1.361(15) . ?
N2 C1 1.376(15) . ?
N3 C11 1.424(15) . ?
N3 H3 0.9100 . ?
N4 C11 1.368(17) . ?
N4 C15 1.373(16) . ?
N5 C21 1.420(14) . ?
N5 H5 0.9099 . ?
N6 C21 1.374(16) . ?
N6 C25 1.390(15) . ?
C1 C2 1.381(17) . ?
C2 C3 1.388(17) . ?
C2 H2 0.9300 . ?
C3 C4 1.39(2) . ?
C3 H3A 0.9300 . ?
C4 C5 1.34(2) . ?
C4 H4 0.9300 . ?
C5 C6 1.52(2) . ?
C6 H6A 0.9600 . ?
C6 H6B 0.9600 . ?
C6 H6C 0.9600 . ?
C11 C12 1.404(18) . ?
C12 C13 1.37(2) . ?
C12 H12 0.9300 . ?
C13 C14 1.34(3) . ?
C13 H13 0.9300 . ?
C14 C15 1.39(3) . ?
C14 H14 0.9300 . ?
C15 C16 1.52(3) . ?
C16 H16A 0.9600 . ?
C16 H16B 0.9600 . ?
C16 H16C 0.9600 . ?
C21 C22 1.382(17) . ?
C22 C23 1.38(2) . ?
C22 H22 0.9300 . ?
C23 C24 1.36(3) . ?
C23 H23 0.9300 . ?
C24 C25 1.38(2) . ?
C24 H24 0.9300 . ?
C25 C26 1.48(2) . ?
C26 H26A 0.9600 . ?
C26 H26B 0.9600 . ?
C26 H26C 0.9600 . ?
 
loop_
 _geom_angle_atom_site_label_1
 _geom_angle_atom_site_label_2
 _geom_angle_atom_site_label_3
 _geom_angle
 _geom_angle_site_symmetry_1
 _geom_angle_site_symmetry_3
 _geom_angle_publ_flag
C101 Ru1 C102 81.5(5) . . ?
C101 Ru1 O20 163.4(5) . . ?
C102 Ru1 O20 108.8(4) . . ?
C101 Ru1 N1 99.4(4) . . ?
C102 Ru1 N1 170.4(4) . . ?
O20 Ru1 N1 72.7(3) . . ?
C101 Ru1 Ru3 86.6(4) . . ?
C102 Ru1 Ru3 97.8(4) . . ?
O20 Ru1 Ru3 104.34(18) . . ?
N1 Ru1 Ru3 72.8(2) . . ?
C101 Ru1 Ru4 117.2(4) . . ?
C102 Ru1 Ru4 142.5(4) . . ?
O20 Ru1 Ru4 46.99(18) . . ?
N1 Ru1 Ru4 45.2(2) . . ?
Ru3 Ru1 Ru4 114.67(4) . . ?
C101 Ru1 Ru5 134.1(4) . . ?
C102 Ru1 Ru5 65.3(4) . . ?
O20 Ru1 Ru5 47.30(19) . . ?
N1 Ru1 Ru5 118.6(2) . . ?
Ru3 Ru1 Ru5 126.91(4) . . ?
Ru4 Ru1 Ru5 79.78(5) . . ?
C101 Ru1 Ru2 132.3(4) . . ?
C102 Ru1 Ru2 128.9(3) . . ?
O20 Ru1 Ru2 50.95(18) . . ?
N1 Ru1 Ru2 44.4(2) . . ?
Ru3 Ru1 Ru2 57.12(4) . . ?
Ru4 Ru1 Ru2 63.79(3) . . ?
Ru5 Ru1 Ru2 93.60(4) . . ?
C201 Ru2 C202 85.3(5) . . ?
C201 Ru2 N1 98.5(4) . . ?
C202 Ru2 N1 171.6(4) . . ?
C201 Ru2 O20 168.5(4) . . ?
C202 Ru2 O20 106.1(4) . . ?
N1 Ru2 O20 70.3(3) . . ?
C201 Ru2 Ru3 80.5(3) . . ?
C202 Ru2 Ru3 99.3(4) . . ?
N1 Ru2 Ru3 74.1(2) . . ?
O20 Ru2 Ru3 98.19(17) . . ?
C201 Ru2 Ru1 129.0(3) . . ?
C202 Ru2 Ru1 124.7(4) . . ?
N1 Ru2 Ru1 47.4(2) . . ?
O20 Ru2 Ru1 44.71(17) . . ?
Ru3 Ru2 Ru1 56.76(3) . . ?
C201 Ru2 Ru6 68.9(3) . . ?
C202 Ru2 Ru6 94.0(4) . . ?
N1 Ru2 Ru6 94.3(2) . . ?
O20 Ru2 Ru6 108.59(17) . . ?
Ru3 Ru2 Ru6 145.36(4) . . ?
Ru1 Ru2 Ru6 135.29(4) . . ?
C201 Ru2 Ru4 126.0(3) . . ?
C202 Ru2 Ru4 140.2(4) . . ?
N1 Ru2 Ru4 41.6(2) . . ?
O20 Ru2 Ru4 43.56(16) . . ?
Ru3 Ru2 Ru4 108.85(4) . . ?
Ru1 Ru2 Ru4 57.66(4) . . ?
Ru6 Ru2 Ru4 78.57(4) . . ?
C303 Ru3 C302 91.5(7) . . ?
C303 Ru3 C301 90.5(6) . . ?
C302 Ru3 C301 95.1(6) . . ?
C303 Ru3 N2 168.6(5) . . ?
C302 Ru3 N2 97.8(6) . . ?
C301 Ru3 N2 95.2(5) . . ?
C303 Ru3 Ru1 90.0(4) . . ?
C302 Ru3 Ru1 96.7(5) . . ?
C301 Ru3 Ru1 168.2(4) . . ?
N2 Ru3 Ru1 82.4(2) . . ?
C303 Ru3 Ru2 84.3(4) . . ?
C302 Ru3 Ru2 162.2(5) . . ?
C301 Ru3 Ru2 102.2(4) . . ?
N2 Ru3 Ru2 84.8(2) . . ?
Ru1 Ru3 Ru2 66.13(4) . . ?
C402 Ru4 C401 85.8(5) . . ?
C402 Ru4 N1 103.1(4) . . ?
C401 Ru4 N1 91.7(4) . . ?
C402 Ru4 O10 94.5(4) . . ?
C401 Ru4 O10 179.0(4) . . ?
N1 Ru4 O10 89.1(3) . . ?
C402 Ru4 O20 167.7(4) . . ?
C401 Ru4 O20 105.9(4) . . ?
N1 Ru4 O20 73.5(3) . . ?
O10 Ru4 O20 73.8(3) . . ?
C402 Ru4 N5 104.1(4) . . ?
C401 Ru4 N5 96.5(4) . . ?
N1 Ru4 N5 152.0(4) . . ?
O10 Ru4 N5 82.5(3) . . ?
O20 Ru4 N5 78.5(3) . . ?
C402 Ru4 Ru1 140.0(4) . . ?
C401 Ru4 Ru1 70.8(4) . . ?
N1 Ru4 Ru1 47.9(2) . . ?
O10 Ru4 Ru1 109.35(19) . . ?
O20 Ru4 Ru1 45.49(18) . . ?
N5 Ru4 Ru1 110.3(3) . . ?
C402 Ru4 Ru8 129.0(4) . . ?
C401 Ru4 Ru8 127.5(4) . . ?
N1 Ru4 Ru8 111.7(2) . . ?
O10 Ru4 Ru8 51.56(17) . . ?
O20 Ru4 Ru8 45.76(18) . . ?
N5 Ru4 Ru8 43.7(3) . . ?
Ru1 Ru4 Ru8 90.60(4) . . ?
C402 Ru4 Ru2 122.0(3) . . ?
C401 Ru4 Ru2 126.4(4) . . ?
N1 Ru4 Ru2 41.4(2) . . ?
O10 Ru4 Ru2 54.13(18) . . ?
O20 Ru4 Ru2 47.89(18) . . ?
N5 Ru4 Ru2 115.8(3) . . ?
Ru1 Ru4 Ru2 58.55(3) . . ?
Ru8 Ru4 Ru2 72.15(3) . . ?
C501 Ru5 C502 84.0(6) . . ?
C501 Ru5 C802 90.9(6) . . ?
C502 Ru5 C802 87.7(6) . . ?
C501 Ru5 O20 174.6(5) . . ?
C502 Ru5 O20 92.9(4) . . ?
C802 Ru5 O20 93.4(4) . . ?
C501 Ru5 N6 93.9(5) . . ?
C502 Ru5 N6 174.7(5) . . ?
C802 Ru5 N6 87.4(4) . . ?
O20 Ru5 N6 89.6(3) . . ?
C501 Ru5 Ru8 135.4(5) . . ?
C502 Ru5 Ru8 93.4(4) . . ?
C802 Ru5 Ru8 44.6(4) . . ?
O20 Ru5 Ru8 48.97(18) . . ?
N6 Ru5 Ru8 84.7(3) . . ?
C501 Ru5 Ru1 130.6(4) . . ?
C502 Ru5 Ru1 96.4(5) . . ?
C802 Ru5 Ru1 138.5(4) . . ?
O20 Ru5 Ru1 45.26(18) . . ?
N6 Ru5 Ru1 88.7(2) . . ?
Ru8 Ru5 Ru1 93.90(4) . . ?
C601 Ru6 C602 86.9(5) . . ?
C601 Ru6 N3 169.8(5) . . ?
C602 Ru6 N3 97.2(5) . . ?
C601 Ru6 O10 101.5(4) . . ?
C602 Ru6 O10 167.9(4) . . ?
N3 Ru6 O10 76.1(3) . . ?
C601 Ru6 Ru9 97.3(4) . . ?
C602 Ru6 Ru9 84.5(4) . . ?
N3 Ru6 Ru9 73.8(3) . . ?
O10 Ru6 Ru9 102.89(18) . . ?
C601 Ru6 Ru7 122.4(4) . . ?
C602 Ru6 Ru7 132.8(4) . . ?
N3 Ru6 Ru7 48.6(2) . . ?
O10 Ru6 Ru7 48.98(17) . . ?
Ru9 Ru6 Ru7 57.91(4) . . ?
C601 Ru6 Ru2 99.0(4) . . ?
C602 Ru6 Ru2 113.6(4) . . ?
N3 Ru6 Ru2 88.0(2) . . ?
O10 Ru6 Ru2 56.81(18) . . ?
Ru9 Ru6 Ru2 156.15(4) . . ?
Ru7 Ru6 Ru2 98.50(4) . . ?
C702 Ru7 C701 86.6(5) . . ?
C702 Ru7 N3 170.2(5) . . ?
C701 Ru7 N3 98.7(5) . . ?
C702 Ru7 O10 100.8(4) . . ?
C701 Ru7 O10 167.2(5) . . ?
N3 Ru7 O10 75.6(3) . . ?
C702 Ru7 Ru9 98.1(4) . . ?
C701 Ru7 Ru9 85.4(4) . . ?
N3 Ru7 Ru9 74.2(2) . . ?
O10 Ru7 Ru9 103.71(16) . . ?
C702 Ru7 Ru6 122.7(4) . . ?
C701 Ru7 Ru6 134.6(4) . . ?
N3 Ru7 Ru6 48.1(3) . . ?
O10 Ru7 Ru6 48.82(16) . . ?
Ru9 Ru7 Ru6 58.94(3) . . ?
C702 Ru7 Ru8 95.4(4) . . ?
C701 Ru7 Ru8 115.0(4) . . ?
N3 Ru7 Ru8 89.8(2) . . ?
O10 Ru7 Ru8 54.25(16) . . ?
Ru9 Ru7 Ru8 156.14(4) . . ?
Ru6 Ru7 Ru8 97.21(4) . . ?
C801 Ru8 C803 86.7(6) . . ?
C801 Ru8 C802 87.0(5) . . ?
C803 Ru8 C802 87.5(4) . . ?
C801 Ru8 N5 95.1(5) . . ?
C803 Ru8 N5 178.2(5) . . ?
C802 Ru8 N5 92.2(4) . . ?
C801 Ru8 O20 172.7(4) . . ?
C803 Ru8 O20 100.5(4) . . ?
C802 Ru8 O20 92.5(4) . . ?
N5 Ru8 O20 77.7(3) . . ?
C801 Ru8 O10 112.8(4) . . ?
C803 Ru8 O10 103.7(4) . . ?
C802 Ru8 O10 157.4(3) . . ?
N5 Ru8 O10 75.9(3) . . ?
O20 Ru8 O10 66.4(2) . . ?
C801 Ru8 Ru5 131.0(3) . . ?
C803 Ru8 Ru5 98.6(4) . . ?
C802 Ru8 Ru5 45.1(3) . . ?
N5 Ru8 Ru5 80.0(3) . . ?
O20 Ru8 Ru5 47.54(18) . . ?
O10 Ru8 Ru5 112.96(16) . . ?
C801 Ru8 Ru7 67.5(3) . . ?
C803 Ru8 Ru7 92.0(3) . . ?
C802 Ru8 Ru7 154.5(4) . . ?
N5 Ru8 Ru7 89.0(3) . . ?
O20 Ru8 Ru7 112.64(18) . . ?
O10 Ru8 Ru7 46.35(16) . . ?
Ru5 Ru8 Ru7 158.88(4) . . ?
C801 Ru8 Ru4 130.3(4) . . ?
C803 Ru8 Ru4 134.1(4) . . ?
C802 Ru8 Ru4 116.2(3) . . ?
N5 Ru8 Ru4 44.6(2) . . ?
O20 Ru8 Ru4 43.97(17) . . ?
O10 Ru8 Ru4 42.69(15) . . ?
Ru5 Ru8 Ru4 77.64(4) . . ?
Ru7 Ru8 Ru4 81.85(4) . . ?
C903 Ru9 C902 90.2(7) . . ?
C903 Ru9 C901 91.0(7) . . ?
C902 Ru9 C901 95.6(6) . . ?
C903 Ru9 N4 169.6(5) . . ?
C902 Ru9 N4 96.1(5) . . ?
C901 Ru9 N4 96.5(7) . . ?
C903 Ru9 Ru7 86.0(5) . . ?
C902 Ru9 Ru7 161.7(4) . . ?
C901 Ru9 Ru7 102.3(4) . . ?
N4 Ru9 Ru7 85.5(2) . . ?
C903 Ru9 Ru6 85.8(4) . . ?
C902 Ru9 Ru6 98.8(4) . . ?
C901 Ru9 Ru6 165.3(4) . . ?
N4 Ru9 Ru6 85.1(3) . . ?
Ru7 Ru9 Ru6 63.16(3) . . ?
Ru4 O10 Ru6 129.3(3) . . ?
Ru4 O10 Ru7 135.8(3) . . ?
Ru6 O10 Ru7 82.2(2) . . ?
Ru4 O10 Ru8 85.7(2) . . ?
Ru6 O10 Ru8 142.0(3) . . ?
Ru7 O10 Ru8 79.4(2) . . ?
Ru1 O20 Ru4 87.5(2) . . ?
Ru1 O20 Ru5 87.4(3) . . ?
Ru4 O20 Ru5 121.9(3) . . ?
Ru1 O20 Ru8 167.7(3) . . ?
Ru4 O20 Ru8 90.3(3) . . ?
Ru5 O20 Ru8 83.5(2) . . ?
Ru1 O20 Ru2 84.3(2) . . ?
Ru4 O20 Ru2 88.6(2) . . ?
Ru5 O20 Ru2 148.1(3) . . ?
Ru8 O20 Ru2 107.7(3) . . ?
O101 C101 Ru1 179.0(12) . . ?
O102 C102 Ru1 167.1(12) . . ?
O201 C201 Ru2 174.0(10) . . ?
O202 C202 Ru2 172.1(13) . . ?
O301 C301 Ru3 179.0(13) . . ?
O302 C302 Ru3 174.2(19) . . ?
O303 C303 Ru3 177.7(13) . . ?
O401 C401 Ru4 172.4(11) . . ?
O402 C402 Ru4 173.9(10) . . ?
O802 C802 Ru8 137.4(10) . . ?
O802 C802 Ru5 132.1(11) . . ?
Ru8 C802 Ru5 90.3(5) . . ?
O501 C501 Ru5 173.9(12) . . ?
O502 C502 Ru5 173.1(14) . . ?
O601 C601 Ru6 178.3(11) . . ?
O602 C602 Ru6 175.4(12) . . ?
O701 C701 Ru7 178.4(14) . . ?
O702 C702 Ru7 177.5(12) . . ?
O801 C801 Ru8 168.2(10) . . ?
O803 C803 Ru8 177.7(11) . . ?
O901 C901 Ru9 176.7(19) . . ?
O902 C902 Ru9 176.7(16) . . ?
O903 C903 Ru9 177.0(14) . . ?
C1 N1 Ru2 123.1(6) . . ?
C1 N1 Ru4 134.5(7) . . ?
Ru2 N1 Ru4 97.1(3) . . ?
C1 N1 Ru1 112.5(6) . . ?
Ru2 N1 Ru1 88.2(3) . . ?
Ru4 N1 Ru1 86.9(3) . . ?
C5 N2 C1 117.1(11) . . ?
C5 N2 Ru3 129.3(9) . . ?
C1 N2 Ru3 113.3(7) . . ?
C11 N3 Ru6 115.8(7) . . ?
C11 N3 Ru7 121.6(8) . . ?
Ru6 N3 Ru7 83.3(3) . . ?
C11 N3 H3 111.1 . . ?
Ru6 N3 H3 111.1 . . ?
Ru7 N3 H3 111.1 . . ?
C11 N4 C15 116.9(12) . . ?
C11 N4 Ru9 112.9(7) . . ?
C15 N4 Ru9 129.9(10) . . ?
C21 N5 Ru8 125.1(8) . . ?
C21 N5 Ru4 110.0(6) . . ?
Ru8 N5 Ru4 91.7(4) . . ?
C21 N5 H5 109.4 . . ?
Ru8 N5 H5 109.4 . . ?
Ru4 N5 H5 109.4 . . ?
C21 N6 C25 116.7(10) . . ?
C21 N6 Ru5 120.8(7) . . ?
C25 N6 Ru5 121.4(9) . . ?
N2 C1 C2 122.6(10) . . ?
N2 C1 N1 114.4(9) . . ?
C2 C1 N1 122.7(10) . . ?
C1 C2 C3 117.2(12) . . ?
C1 C2 H2 121.4 . . ?
C3 C2 H2 121.4 . . ?
C4 C3 C2 120.7(12) . . ?
C4 C3 H3A 119.7 . . ?
C2 C3 H3A 119.7 . . ?
C5 C4 C3 118.8(11) . . ?
C5 C4 H4 120.6 . . ?
C3 C4 H4 120.6 . . ?
C4 C5 N2 123.4(13) . . ?
C4 C5 C6 118.5(13) . . ?
N2 C5 C6 118.0(14) . . ?
C5 C6 H6A 109.5 . . ?
C5 C6 H6B 109.5 . . ?
H6A C6 H6B 109.5 . . ?
C5 C6 H6C 109.5 . . ?
H6A C6 H6C 109.5 . . ?
H6B C6 H6C 109.5 . . ?
N4 C11 C12 123.1(11) . . ?
N4 C11 N3 115.4(10) . . ?
C12 C11 N3 121.5(11) . . ?
C13 C12 C11 117.8(16) . . ?
C13 C12 H12 121.1 . . ?
C11 C12 H12 121.1 . . ?
C14 C13 C12 119.7(16) . . ?
C14 C13 H13 120.2 . . ?
C12 C13 H13 120.2 . . ?
C13 C14 C15 122.1(14) . . ?
C13 C14 H14 118.9 . . ?
C15 C14 H14 118.9 . . ?
N4 C15 C14 120.1(15) . . ?
N4 C15 C16 117.4(15) . . ?
C14 C15 C16 122.5(14) . . ?
C15 C16 H16A 109.5 . . ?
C15 C16 H16B 109.5 . . ?
H16A C16 H16B 109.5 . . ?
C15 C16 H16C 109.5 . . ?
H16A C16 H16C 109.5 . . ?
H16B C16 H16C 109.5 . . ?
N6 C21 C22 122.9(10) . . ?
N6 C21 N5 116.6(10) . . ?
C22 C21 N5 120.1(11) . . ?
C23 C22 C21 118.9(14) . . ?
C23 C22 H22 120.5 . . ?
C21 C22 H22 120.5 . . ?
C24 C23 C22 119.0(14) . . ?
C24 C23 H23 120.5 . . ?
C22 C23 H23 120.5 . . ?
C23 C24 C25 121.8(13) . . ?
C23 C24 H24 119.1 . . ?
C25 C24 H24 119.1 . . ?
C24 C25 N6 120.1(14) . . ?
C24 C25 C26 120.4(12) . . ?
N6 C25 C26 119.5(12) . . ?
C25 C26 H26A 109.5 . . ?
C25 C26 H26B 109.5 . . ?
H26A C26 H26B 109.5 . . ?
C25 C26 H26C 109.5 . . ?
H26A C26 H26C 109.5 . . ?
H26B C26 H26C 109.5 . . ?
 
loop_
 _geom_torsion_atom_site_label_1
 _geom_torsion_atom_site_label_2
 _geom_torsion_atom_site_label_3
 _geom_torsion_atom_site_label_4
 _geom_torsion
 _geom_torsion_site_symmetry_1
 _geom_torsion_site_symmetry_2
 _geom_torsion_site_symmetry_3
 _geom_torsion_site_symmetry_4
 _geom_torsion_publ_flag
C101 Ru1 Ru2 C201 8.6(7) . . . . ?
C102 Ru1 Ru2 C201 -109.9(7) . . . . ?
O20 Ru1 Ru2 C201 167.0(5) . . . . ?
N1 Ru1 Ru2 C201 60.8(5) . . . . ?
Ru3 Ru1 Ru2 C201 -38.3(4) . . . . ?
Ru4 Ru1 Ru2 C201 112.5(4) . . . . ?
Ru5 Ru1 Ru2 C201 -170.8(4) . . . . ?
C101 Ru1 Ru2 C202 124.3(8) . . . . ?
C102 Ru1 Ru2 C202 5.7(7) . . . . ?
O20 Ru1 Ru2 C202 -77.3(6) . . . . ?
N1 Ru1 Ru2 C202 176.5(6) . . . . ?
Ru3 Ru1 Ru2 C202 77.4(5) . . . . ?
Ru4 Ru1 Ru2 C202 -131.9(5) . . . . ?
Ru5 Ru1 Ru2 C202 -55.1(5) . . . . ?
C101 Ru1 Ru2 N1 -52.2(6) . . . . ?
C102 Ru1 Ru2 N1 -170.7(6) . . . . ?
O20 Ru1 Ru2 N1 106.2(4) . . . . ?
Ru3 Ru1 Ru2 N1 -99.1(3) . . . . ?
Ru4 Ru1 Ru2 N1 51.7(3) . . . . ?
Ru5 Ru1 Ru2 N1 128.4(3) . . . . ?
C101 Ru1 Ru2 O20 -158.4(6) . . . . ?
C102 Ru1 Ru2 O20 83.0(6) . . . . ?
N1 Ru1 Ru2 O20 -106.2(4) . . . . ?
Ru3 Ru1 Ru2 O20 154.7(2) . . . . ?
Ru4 Ru1 Ru2 O20 -54.6(2) . . . . ?
Ru5 Ru1 Ru2 O20 22.2(2) . . . . ?
C101 Ru1 Ru2 Ru3 46.9(6) . . . . ?
C102 Ru1 Ru2 Ru3 -71.7(5) . . . . ?
O20 Ru1 Ru2 Ru3 -154.7(2) . . . . ?
N1 Ru1 Ru2 Ru3 99.1(3) . . . . ?
Ru4 Ru1 Ru2 Ru3 150.72(4) . . . . ?
Ru5 Ru1 Ru2 Ru3 -132.52(5) . . . . ?
C101 Ru1 Ru2 Ru6 -90.5(6) . . . . ?
C102 Ru1 Ru2 Ru6 150.9(5) . . . . ?
O20 Ru1 Ru2 Ru6 67.9(2) . . . . ?
N1 Ru1 Ru2 Ru6 -38.3(3) . . . . ?
Ru3 Ru1 Ru2 Ru6 -137.40(6) . . . . ?
Ru4 Ru1 Ru2 Ru6 13.32(5) . . . . ?
Ru5 Ru1 Ru2 Ru6 90.08(6) . . . . ?
C101 Ru1 Ru2 Ru4 -103.9(6) . . . . ?
C102 Ru1 Ru2 Ru4 137.6(5) . . . . ?
O20 Ru1 Ru2 Ru4 54.6(2) . . . . ?
N1 Ru1 Ru2 Ru4 -51.7(3) . . . . ?
Ru3 Ru1 Ru2 Ru4 -150.72(4) . . . . ?
Ru5 Ru1 Ru2 Ru4 76.76(4) . . . . ?
C101 Ru1 Ru3 C303 129.0(6) . . . . ?
C102 Ru1 Ru3 C303 48.0(5) . . . . ?
O20 Ru1 Ru3 C303 -63.7(4) . . . . ?
N1 Ru1 Ru3 C303 -130.1(5) . . . . ?
Ru4 Ru1 Ru3 C303 -112.6(4) . . . . ?
Ru5 Ru1 Ru3 C303 -16.8(4) . . . . ?
Ru2 Ru1 Ru3 C303 -83.7(4) . . . . ?
C101 Ru1 Ru3 C302 37.4(7) . . . . ?
C102 Ru1 Ru3 C302 -43.5(7) . . . . ?
O20 Ru1 Ru3 C302 -155.3(6) . . . . ?
N1 Ru1 Ru3 C302 138.4(6) . . . . ?
Ru4 Ru1 Ru3 C302 155.8(6) . . . . ?
Ru5 Ru1 Ru3 C302 -108.4(6) . . . . ?
Ru2 Ru1 Ru3 C302 -175.3(6) . . . . ?
C101 Ru1 Ru3 C301 -138(2) . . . . ?
C102 Ru1 Ru3 C301 141(2) . . . . ?
O20 Ru1 Ru3 C301 29(2) . . . . ?
N1 Ru1 Ru3 C301 -37(2) . . . . ?
Ru4 Ru1 Ru3 C301 -20(2) . . . . ?
Ru5 Ru1 Ru3 C301 76(2) . . . . ?
Ru2 Ru1 Ru3 C301 9(2) . . . . ?
C101 Ru1 Ru3 N2 -59.6(4) . . . . ?
C102 Ru1 Ru3 N2 -140.5(4) . . . . ?
O20 Ru1 Ru3 N2 107.7(3) . . . . ?
N1 Ru1 Ru3 N2 41.4(3) . . . . ?
Ru4 Ru1 Ru3 N2 58.8(2) . . . . ?
Ru5 Ru1 Ru3 N2 154.6(2) . . . . ?
Ru2 Ru1 Ru3 N2 87.7(2) . . . . ?
C101 Ru1 Ru3 Ru2 -147.3(4) . . . . ?
C102 Ru1 Ru3 Ru2 131.8(3) . . . . ?
O20 Ru1 Ru3 Ru2 20.03(19) . . . . ?
N1 Ru1 Ru3 Ru2 -46.3(2) . . . . ?
Ru4 Ru1 Ru3 Ru2 -28.87(4) . . . . ?
Ru5 Ru1 Ru3 Ru2 66.92(5) . . . . ?
C201 Ru2 Ru3 C303 -116.6(5) . . . . ?
C202 Ru2 Ru3 C303 -33.0(5) . . . . ?
N1 Ru2 Ru3 C303 141.6(4) . . . . ?
O20 Ru2 Ru3 C303 74.9(4) . . . . ?
Ru1 Ru2 Ru3 C303 92.6(4) . . . . ?
Ru6 Ru2 Ru3 C303 -144.3(4) . . . . ?
Ru4 Ru2 Ru3 C303 118.5(4) . . . . ?
C201 Ru2 Ru3 C302 166.3(19) . . . . ?
C202 Ru2 Ru3 C302 -110.1(19) . . . . ?
N1 Ru2 Ru3 C302 64.6(19) . . . . ?
O20 Ru2 Ru3 C302 -2.2(19) . . . . ?
Ru1 Ru2 Ru3 C302 15.5(19) . . . . ?
Ru6 Ru2 Ru3 C302 138.6(19) . . . . ?
Ru4 Ru2 Ru3 C302 41.4(19) . . . . ?
C201 Ru2 Ru3 C301 -27.3(6) . . . . ?
C202 Ru2 Ru3 C301 56.3(6) . . . . ?
N1 Ru2 Ru3 C301 -129.1(5) . . . . ?
O20 Ru2 Ru3 C301 164.2(5) . . . . ?
Ru1 Ru2 Ru3 C301 -178.1(4) . . . . ?
Ru6 Ru2 Ru3 C301 -55.0(4) . . . . ?
Ru4 Ru2 Ru3 C301 -152.2(4) . . . . ?
C201 Ru2 Ru3 N2 66.9(4) . . . . ?
C202 Ru2 Ru3 N2 150.5(5) . . . . ?
N1 Ru2 Ru3 N2 -34.9(3) . . . . ?
O20 Ru2 Ru3 N2 -101.6(3) . . . . ?
Ru1 Ru2 Ru3 N2 -83.9(2) . . . . ?
Ru6 Ru2 Ru3 N2 39.2(2) . . . . ?
Ru4 Ru2 Ru3 N2 -58.1(2) . . . . ?
C201 Ru2 Ru3 Ru1 150.8(3) . . . . ?
C202 Ru2 Ru3 Ru1 -125.6(4) . . . . ?
N1 Ru2 Ru3 Ru1 49.1(2) . . . . ?
O20 Ru2 Ru3 Ru1 -17.68(16) . . . . ?
Ru6 Ru2 Ru3 Ru1 123.11(7) . . . . ?
Ru4 Ru2 Ru3 Ru1 25.89(4) . . . . ?
C101 Ru1 Ru4 C402 22.4(7) . . . . ?
C102 Ru1 Ru4 C402 135.7(8) . . . . ?
O20 Ru1 Ru4 C402 -163.7(6) . . . . ?
N1 Ru1 Ru4 C402 -53.1(6) . . . . ?
Ru3 Ru1 Ru4 C402 -76.9(5) . . . . ?
Ru5 Ru1 Ru4 C402 157.0(5) . . . . ?
Ru2 Ru1 Ru4 C402 -103.8(5) . . . . ?
C101 Ru1 Ru4 C401 -35.3(6) . . . . ?
C102 Ru1 Ru4 C401 77.9(6) . . . . ?
O20 Ru1 Ru4 C401 138.5(4) . . . . ?
N1 Ru1 Ru4 C401 -110.9(5) . . . . ?
Ru3 Ru1 Ru4 C401 -134.7(4) . . . . ?
Ru5 Ru1 Ru4 C401 99.2(4) . . . . ?
Ru2 Ru1 Ru4 C401 -161.6(4) . . . . ?
C101 Ru1 Ru4 N1 75.5(5) . . . . ?
C102 Ru1 Ru4 N1 -171.2(6) . . . . ?
O20 Ru1 Ru4 N1 -110.6(4) . . . . ?
Ru3 Ru1 Ru4 N1 -23.8(3) . . . . ?
Ru5 Ru1 Ru4 N1 -149.9(3) . . . . ?
Ru2 Ru1 Ru4 N1 -50.7(3) . . . . ?
C101 Ru1 Ru4 O10 145.7(5) . . . . ?
C102 Ru1 Ru4 O10 -101.0(6) . . . . ?
O20 Ru1 Ru4 O10 -40.4(3) . . . . ?
N1 Ru1 Ru4 O10 70.2(3) . . . . ?
Ru3 Ru1 Ru4 O10 46.36(18) . . . . ?
Ru5 Ru1 Ru4 O10 -79.71(18) . . . . ?
Ru2 Ru1 Ru4 O10 19.49(18) . . . . ?
C101 Ru1 Ru4 O20 -173.8(5) . . . . ?
C102 Ru1 Ru4 O20 -60.6(6) . . . . ?
N1 Ru1 Ru4 O20 110.6(4) . . . . ?
Ru3 Ru1 Ru4 O20 86.8(2) . . . . ?
Ru5 Ru1 Ru4 O20 -39.3(2) . . . . ?
Ru2 Ru1 Ru4 O20 59.9(2) . . . . ?
C101 Ru1 Ru4 N5 -125.3(5) . . . . ?
C102 Ru1 Ru4 N5 -12.0(6) . . . . ?
O20 Ru1 Ru4 N5 48.6(4) . . . . ?
N1 Ru1 Ru4 N5 159.2(4) . . . . ?
Ru3 Ru1 Ru4 N5 135.4(3) . . . . ?
Ru5 Ru1 Ru4 N5 9.3(3) . . . . ?
Ru2 Ru1 Ru4 N5 108.5(3) . . . . ?
C101 Ru1 Ru4 Ru8 -165.2(4) . . . . ?
C102 Ru1 Ru4 Ru8 -52.0(5) . . . . ?
O20 Ru1 Ru4 Ru8 8.6(2) . . . . ?
N1 Ru1 Ru4 Ru8 119.2(3) . . . . ?
Ru3 Ru1 Ru4 Ru8 95.42(5) . . . . ?
Ru5 Ru1 Ru4 Ru8 -30.65(3) . . . . ?
Ru2 Ru1 Ru4 Ru8 68.55(3) . . . . ?
C101 Ru1 Ru4 Ru2 126.2(4) . . . . ?
C102 Ru1 Ru4 Ru2 -120.5(5) . . . . ?
O20 Ru1 Ru4 Ru2 -59.9(2) . . . . ?
N1 Ru1 Ru4 Ru2 50.7(3) . . . . ?
Ru3 Ru1 Ru4 Ru2 26.87(4) . . . . ?
Ru5 Ru1 Ru4 Ru2 -99.20(3) . . . . ?
C201 Ru2 Ru4 C402 15.1(6) . . . . ?
C202 Ru2 Ru4 C402 -120.4(7) . . . . ?
N1 Ru2 Ru4 C402 72.2(5) . . . . ?
O20 Ru2 Ru4 C402 -171.1(5) . . . . ?
Ru3 Ru2 Ru4 C402 107.0(4) . . . . ?
Ru1 Ru2 Ru4 C402 132.6(4) . . . . ?
Ru6 Ru2 Ru4 C402 -37.9(4) . . . . ?
C201 Ru2 Ru4 C401 -95.7(6) . . . . ?
C202 Ru2 Ru4 C401 128.8(7) . . . . ?
N1 Ru2 Ru4 C401 -38.6(6) . . . . ?
O20 Ru2 Ru4 C401 78.1(5) . . . . ?
Ru3 Ru2 Ru4 C401 -3.8(4) . . . . ?
Ru1 Ru2 Ru4 C401 21.8(4) . . . . ?
Ru6 Ru2 Ru4 C401 -148.7(4) . . . . ?
C201 Ru2 Ru4 N1 -57.1(5) . . . . ?
C202 Ru2 Ru4 N1 167.4(7) . . . . ?
O20 Ru2 Ru4 N1 116.7(4) . . . . ?
Ru3 Ru2 Ru4 N1 34.8(4) . . . . ?
Ru1 Ru2 Ru4 N1 60.4(4) . . . . ?
Ru6 Ru2 Ru4 N1 -110.1(4) . . . . ?
C201 Ru2 Ru4 O10 85.4(5) . . . . ?
C202 Ru2 Ru4 O10 -50.1(6) . . . . ?
N1 Ru2 Ru4 O10 142.5(4) . . . . ?
O20 Ru2 Ru4 O10 -100.8(3) . . . . ?
Ru3 Ru2 Ru4 O10 177.3(2) . . . . ?
Ru1 Ru2 Ru4 O10 -157.1(2) . . . . ?
Ru6 Ru2 Ru4 O10 32.4(2) . . . . ?
C201 Ru2 Ru4 O20 -173.8(5) . . . . ?
C202 Ru2 Ru4 O20 50.7(6) . . . . ?
N1 Ru2 Ru4 O20 -116.7(4) . . . . ?
Ru3 Ru2 Ru4 O20 -81.9(2) . . . . ?
Ru1 Ru2 Ru4 O20 -56.3(2) . . . . ?
Ru6 Ru2 Ru4 O20 133.2(2) . . . . ?
C201 Ru2 Ru4 N5 143.5(5) . . . . ?
C202 Ru2 Ru4 N5 8.0(6) . . . . ?
N1 Ru2 Ru4 N5 -159.4(4) . . . . ?
O20 Ru2 Ru4 N5 -42.7(4) . . . . ?
Ru3 Ru2 Ru4 N5 -124.6(3) . . . . ?
Ru1 Ru2 Ru4 N5 -99.0(3) . . . . ?
Ru6 Ru2 Ru4 N5 90.5(3) . . . . ?
C201 Ru2 Ru4 Ru1 -117.5(4) . . . . ?
C202 Ru2 Ru4 Ru1 107.0(6) . . . . ?
N1 Ru2 Ru4 Ru1 -60.4(3) . . . . ?
O20 Ru2 Ru4 Ru1 56.3(2) . . . . ?
Ru3 Ru2 Ru4 Ru1 -25.61(4) . . . . ?
Ru6 Ru2 Ru4 Ru1 -170.48(4) . . . . ?
C201 Ru2 Ru4 Ru8 140.4(4) . . . . ?
C202 Ru2 Ru4 Ru8 4.9(6) . . . . ?
N1 Ru2 Ru4 Ru8 -162.5(3) . . . . ?
O20 Ru2 Ru4 Ru8 -45.8(2) . . . . ?
Ru3 Ru2 Ru4 Ru8 -127.72(4) . . . . ?
Ru1 Ru2 Ru4 Ru8 -102.12(4) . . . . ?
Ru6 Ru2 Ru4 Ru8 87.40(4) . . . . ?
C101 Ru1 Ru5 C501 -27.6(8) . . . . ?
C102 Ru1 Ru5 C501 20.2(7) . . . . ?
O20 Ru1 Ru5 C501 175.2(6) . . . . ?
N1 Ru1 Ru5 C501 -169.6(6) . . . . ?
Ru3 Ru1 Ru5 C501 101.0(6) . . . . ?
Ru4 Ru1 Ru5 C501 -145.7(6) . . . . ?
Ru2 Ru1 Ru5 C501 151.7(6) . . . . ?
C101 Ru1 Ru5 C502 -115.2(7) . . . . ?
C102 Ru1 Ru5 C502 -67.4(5) . . . . ?
O20 Ru1 Ru5 C502 87.6(5) . . . . ?
N1 Ru1 Ru5 C502 102.8(5) . . . . ?
Ru3 Ru1 Ru5 C502 13.4(4) . . . . ?
Ru4 Ru1 Ru5 C502 126.7(4) . . . . ?
Ru2 Ru1 Ru5 C502 64.1(4) . . . . ?
C101 Ru1 Ru5 C802 150.9(8) . . . . ?
C102 Ru1 Ru5 C802 -161.3(6) . . . . ?
O20 Ru1 Ru5 C802 -6.2(5) . . . . ?
N1 Ru1 Ru5 C802 8.9(6) . . . . ?
Ru3 Ru1 Ru5 C802 -80.4(5) . . . . ?
Ru4 Ru1 Ru5 C802 32.8(5) . . . . ?
Ru2 Ru1 Ru5 C802 -29.7(5) . . . . ?
C101 Ru1 Ru5 O20 157.1(6) . . . . ?
C102 Ru1 Ru5 O20 -155.1(4) . . . . ?
N1 Ru1 Ru5 O20 15.1(3) . . . . ?
Ru3 Ru1 Ru5 O20 -74.2(2) . . . . ?
Ru4 Ru1 Ru5 O20 39.0(2) . . . . ?
Ru2 Ru1 Ru5 O20 -23.5(2) . . . . ?
C101 Ru1 Ru5 N6 66.3(6) . . . . ?
C102 Ru1 Ru5 N6 114.1(4) . . . . ?
O20 Ru1 Ru5 N6 -90.8(3) . . . . ?
N1 Ru1 Ru5 N6 -75.7(3) . . . . ?
Ru3 Ru1 Ru5 N6 -165.1(2) . . . . ?
Ru4 Ru1 Ru5 N6 -51.8(2) . . . . ?
Ru2 Ru1 Ru5 N6 -114.3(2) . . . . ?
C101 Ru1 Ru5 Ru8 150.9(6) . . . . ?
C102 Ru1 Ru5 Ru8 -161.3(4) . . . . ?
O20 Ru1 Ru5 Ru8 -6.2(2) . . . . ?
N1 Ru1 Ru5 Ru8 8.9(2) . . . . ?
Ru3 Ru1 Ru5 Ru8 -80.48(6) . . . . ?
Ru4 Ru1 Ru5 Ru8 32.79(3) . . . . ?
Ru2 Ru1 Ru5 Ru8 -29.76(4) . . . . ?
C201 Ru2 Ru6 C601 -68.6(5) . . . . ?
C202 Ru2 Ru6 C601 -152.0(5) . . . . ?
N1 Ru2 Ru6 C601 28.9(4) . . . . ?
O20 Ru2 Ru6 C601 99.5(4) . . . . ?
Ru3 Ru2 Ru6 C601 -39.1(4) . . . . ?
Ru1 Ru2 Ru6 C601 56.1(4) . . . . ?
Ru4 Ru2 Ru6 C601 67.5(4) . . . . ?
C201 Ru2 Ru6 C602 21.9(6) . . . . ?
C202 Ru2 Ru6 C602 -61.5(6) . . . . ?
N1 Ru2 Ru6 C602 119.4(5) . . . . ?
O20 Ru2 Ru6 C602 -169.9(5) . . . . ?
Ru3 Ru2 Ru6 C602 51.4(5) . . . . ?
Ru1 Ru2 Ru6 C602 146.6(5) . . . . ?
Ru4 Ru2 Ru6 C602 158.1(5) . . . . ?
C201 Ru2 Ru6 N3 118.9(4) . . . . ?
C202 Ru2 Ru6 N3 35.5(5) . . . . ?
N1 Ru2 Ru6 N3 -143.7(3) . . . . ?
O20 Ru2 Ru6 N3 -73.0(3) . . . . ?
Ru3 Ru2 Ru6 N3 148.3(3) . . . . ?
Ru1 Ru2 Ru6 N3 -116.4(2) . . . . ?
Ru4 Ru2 Ru6 N3 -105.0(2) . . . . ?
C201 Ru2 Ru6 O10 -166.4(4) . . . . ?
C202 Ru2 Ru6 O10 110.2(5) . . . . ?
N1 Ru2 Ru6 O10 -69.0(3) . . . . ?
O20 Ru2 Ru6 O10 1.7(3) . . . . ?
Ru3 Ru2 Ru6 O10 -137.0(2) . . . . ?
Ru1 Ru2 Ru6 O10 -41.8(2) . . . . ?
Ru4 Ru2 Ru6 O10 -30.3(2) . . . . ?
C201 Ru2 Ru6 Ru9 158.7(4) . . . . ?
C202 Ru2 Ru6 Ru9 75.3(4) . . . . ?
N1 Ru2 Ru6 Ru9 -103.9(2) . . . . ?
O20 Ru2 Ru6 Ru9 -33.2(2) . . . . ?
Ru3 Ru2 Ru6 Ru9 -171.90(9) . . . . ?
Ru1 Ru2 Ru6 Ru9 -76.66(12) . . . . ?
Ru4 Ru2 Ru6 Ru9 -65.21(11) . . . . ?
C201 Ru2 Ru6 Ru7 166.5(4) . . . . ?
C202 Ru2 Ru6 Ru7 83.1(4) . . . . ?
N1 Ru2 Ru6 Ru7 -96.1(2) . . . . ?
O20 Ru2 Ru6 Ru7 -25.37(16) . . . . ?
Ru3 Ru2 Ru6 Ru7 -164.06(6) . . . . ?
Ru1 Ru2 Ru6 Ru7 -68.82(6) . . . . ?
Ru4 Ru2 Ru6 Ru7 -57.36(3) . . . . ?
C601 Ru6 Ru7 C702 -1.7(6) . . . . ?
C602 Ru6 Ru7 C702 -121.6(7) . . . . ?
N3 Ru6 Ru7 C702 -175.5(5) . . . . ?
O10 Ru6 Ru7 C702 74.5(5) . . . . ?
Ru9 Ru6 Ru7 C702 -79.0(4) . . . . ?
Ru2 Ru6 Ru7 C702 104.8(4) . . . . ?
C601 Ru6 Ru7 C701 120.8(8) . . . . ?
C602 Ru6 Ru7 C701 0.8(8) . . . . ?
N3 Ru6 Ru7 C701 -53.1(7) . . . . ?
O10 Ru6 Ru7 C701 -163.1(7) . . . . ?
Ru9 Ru6 Ru7 C701 43.4(6) . . . . ?
Ru2 Ru6 Ru7 C701 -132.8(6) . . . . ?
C601 Ru6 Ru7 N3 173.9(6) . . . . ?
C602 Ru6 Ru7 N3 53.9(6) . . . . ?
O10 Ru6 Ru7 N3 -110.0(4) . . . . ?
Ru9 Ru6 Ru7 N3 96.6(3) . . . . ?
Ru2 Ru6 Ru7 N3 -79.7(3) . . . . ?
C601 Ru6 Ru7 O10 -76.1(5) . . . . ?
C602 Ru6 Ru7 O10 163.9(6) . . . . ?
N3 Ru6 Ru7 O10 110.0(4) . . . . ?
Ru9 Ru6 Ru7 O10 -153.4(2) . . . . ?
Ru2 Ru6 Ru7 O10 30.3(2) . . . . ?
C601 Ru6 Ru7 Ru9 77.3(5) . . . . ?
C602 Ru6 Ru7 Ru9 -42.6(5) . . . . ?
N3 Ru6 Ru7 Ru9 -96.6(3) . . . . ?
O10 Ru6 Ru7 Ru9 153.4(2) . . . . ?
Ru2 Ru6 Ru7 Ru9 -176.27(4) . . . . ?
C601 Ru6 Ru7 Ru8 -102.9(5) . . . . ?
C602 Ru6 Ru7 Ru8 137.2(5) . . . . ?
N3 Ru6 Ru7 Ru8 83.3(3) . . . . ?
O10 Ru6 Ru7 Ru8 -26.7(2) . . . . ?
Ru9 Ru6 Ru7 Ru8 179.82(4) . . . . ?
Ru2 Ru6 Ru7 Ru8 3.55(4) . . . . ?
C501 Ru5 Ru8 C801 13.8(8) . . . . ?
C502 Ru5 Ru8 C801 98.7(7) . . . . ?
C802 Ru5 Ru8 C801 15.4(7) . . . . ?
O20 Ru5 Ru8 C801 -170.5(6) . . . . ?
N6 Ru5 Ru8 C801 -76.3(6) . . . . ?
Ru1 Ru5 Ru8 C801 -164.6(5) . . . . ?
C501 Ru5 Ru8 C803 -79.4(7) . . . . ?
C502 Ru5 Ru8 C803 5.6(6) . . . . ?
C802 Ru5 Ru8 C803 -77.7(6) . . . . ?
O20 Ru5 Ru8 C803 96.4(4) . . . . ?
N6 Ru5 Ru8 C803 -169.5(4) . . . . ?
Ru1 Ru5 Ru8 C803 102.2(4) . . . . ?
C501 Ru5 Ru8 C802 -1.6(8) . . . . ?
C502 Ru5 Ru8 C802 83.3(7) . . . . ?
O20 Ru5 Ru8 C802 174.1(5) . . . . ?
N6 Ru5 Ru8 C802 -91.7(5) . . . . ?
Ru1 Ru5 Ru8 C802 180.0(5) . . . . ?
C501 Ru5 Ru8 N5 101.8(7) . . . . ?
C502 Ru5 Ru8 N5 -173.3(5) . . . . ?
C802 Ru5 Ru8 N5 103.4(5) . . . . ?
O20 Ru5 Ru8 N5 -82.5(3) . . . . ?
N6 Ru5 Ru8 N5 11.7(3) . . . . ?
Ru1 Ru5 Ru8 N5 -76.6(2) . . . . ?
C501 Ru5 Ru8 O20 -175.7(6) . . . . ?
C502 Ru5 Ru8 O20 -90.8(5) . . . . ?
C802 Ru5 Ru8 O20 -174.1(5) . . . . ?
N6 Ru5 Ru8 O20 94.2(3) . . . . ?
Ru1 Ru5 Ru8 O20 5.9(2) . . . . ?
C501 Ru5 Ru8 O10 171.7(6) . . . . ?
C502 Ru5 Ru8 O10 -103.4(5) . . . . ?
C802 Ru5 Ru8 O10 173.4(5) . . . . ?
O20 Ru5 Ru8 O10 -12.6(3) . . . . ?
N6 Ru5 Ru8 O10 81.6(3) . . . . ?
Ru1 Ru5 Ru8 O10 -6.67(17) . . . . ?
C501 Ru5 Ru8 Ru7 161.3(6) . . . . ?
C502 Ru5 Ru8 Ru7 -113.8(5) . . . . ?
C802 Ru5 Ru8 Ru7 163.0(5) . . . . ?
O20 Ru5 Ru8 Ru7 -23.0(2) . . . . ?
N6 Ru5 Ru8 Ru7 71.2(2) . . . . ?
Ru1 Ru5 Ru8 Ru7 -17.08(12) . . . . ?
C501 Ru5 Ru8 Ru4 147.2(6) . . . . ?
C502 Ru5 Ru8 Ru4 -127.9(5) . . . . ?
C802 Ru5 Ru8 Ru4 148.9(5) . . . . ?
O20 Ru5 Ru8 Ru4 -37.0(2) . . . . ?
N6 Ru5 Ru8 Ru4 57.1(2) . . . . ?
Ru1 Ru5 Ru8 Ru4 -31.17(3) . . . . ?
C702 Ru7 Ru8 C801 67.9(6) . . . . ?
C701 Ru7 Ru8 C801 -20.9(6) . . . . ?
N3 Ru7 Ru8 C801 -120.4(5) . . . . ?
O10 Ru7 Ru8 C801 167.3(5) . . . . ?
Ru9 Ru7 Ru8 C801 -167.7(4) . . . . ?
Ru6 Ru7 Ru8 C801 -168.1(4) . . . . ?
C702 Ru7 Ru8 C803 153.5(6) . . . . ?
C701 Ru7 Ru8 C803 64.7(6) . . . . ?
N3 Ru7 Ru8 C803 -34.8(5) . . . . ?
O10 Ru7 Ru8 C803 -107.1(4) . . . . ?
Ru9 Ru7 Ru8 C803 -82.1(4) . . . . ?
Ru6 Ru7 Ru8 C803 -82.4(4) . . . . ?
C702 Ru7 Ru8 C802 65.1(8) . . . . ?
C701 Ru7 Ru8 C802 -23.7(8) . . . . ?
N3 Ru7 Ru8 C802 -123.2(8) . . . . ?
O10 Ru7 Ru8 C802 164.5(8) . . . . ?
Ru9 Ru7 Ru8 C802 -170.5(7) . . . . ?
Ru6 Ru7 Ru8 C802 -170.9(7) . . . . ?
C702 Ru7 Ru8 N5 -28.0(5) . . . . ?
C701 Ru7 Ru8 N5 -116.8(5) . . . . ?
N3 Ru7 Ru8 N5 143.7(4) . . . . ?
O10 Ru7 Ru8 N5 71.4(3) . . . . ?
Ru9 Ru7 Ru8 N5 96.4(3) . . . . ?
Ru6 Ru7 Ru8 N5 96.0(2) . . . . ?
C702 Ru7 Ru8 O20 -104.2(4) . . . . ?
C701 Ru7 Ru8 O20 167.0(5) . . . . ?
N3 Ru7 Ru8 O20 67.4(3) . . . . ?
O10 Ru7 Ru8 O20 -4.9(3) . . . . ?
Ru9 Ru7 Ru8 O20 20.2(2) . . . . ?
Ru6 Ru7 Ru8 O20 19.78(18) . . . . ?
C702 Ru7 Ru8 O10 -99.4(5) . . . . ?
C701 Ru7 Ru8 O10 171.8(5) . . . . ?
N3 Ru7 Ru8 O10 72.3(3) . . . . ?
Ru9 Ru7 Ru8 O10 25.0(2) . . . . ?
Ru6 Ru7 Ru8 O10 24.7(2) . . . . ?
C702 Ru7 Ru8 Ru5 -86.1(4) . . . . ?
C701 Ru7 Ru8 Ru5 -174.9(4) . . . . ?
N3 Ru7 Ru8 Ru5 85.6(3) . . . . ?
O10 Ru7 Ru8 Ru5 13.3(2) . . . . ?
Ru9 Ru7 Ru8 Ru5 38.33(19) . . . . ?
Ru6 Ru7 Ru8 Ru5 37.95(12) . . . . ?
C702 Ru7 Ru8 Ru4 -72.2(4) . . . . ?
C701 Ru7 Ru8 Ru4 -161.0(4) . . . . ?
N3 Ru7 Ru8 Ru4 99.5(3) . . . . ?
O10 Ru7 Ru8 Ru4 27.2(2) . . . . ?
Ru9 Ru7 Ru8 Ru4 52.23(11) . . . . ?
Ru6 Ru7 Ru8 Ru4 51.85(4) . . . . ?
C402 Ru4 Ru8 C801 -21.0(6) . . . . ?
C401 Ru4 Ru8 C801 99.3(6) . . . . ?
N1 Ru4 Ru8 C801 -150.5(5) . . . . ?
O10 Ru4 Ru8 C801 -80.2(5) . . . . ?
O20 Ru4 Ru8 C801 173.9(5) . . . . ?
N5 Ru4 Ru8 C801 45.9(6) . . . . ?
Ru1 Ru4 Ru8 C801 165.3(4) . . . . ?
Ru2 Ru4 Ru8 C801 -138.2(5) . . . . ?
C402 Ru4 Ru8 C803 114.8(7) . . . . ?
C401 Ru4 Ru8 C803 -124.9(7) . . . . ?
N1 Ru4 Ru8 C803 -14.6(5) . . . . ?
O10 Ru4 Ru8 C803 55.7(5) . . . . ?
O20 Ru4 Ru8 C803 -50.3(5) . . . . ?
N5 Ru4 Ru8 C803 -178.2(6) . . . . ?
Ru1 Ru4 Ru8 C803 -58.8(5) . . . . ?
Ru2 Ru4 Ru8 C803 -2.3(5) . . . . ?
C402 Ru4 Ru8 C802 -131.0(6) . . . . ?
C401 Ru4 Ru8 C802 -10.7(6) . . . . ?
N1 Ru4 Ru8 C802 99.5(5) . . . . ?
O10 Ru4 Ru8 C802 169.8(5) . . . . ?
O20 Ru4 Ru8 C802 63.9(5) . . . . ?
N5 Ru4 Ru8 C802 -64.1(5) . . . . ?
Ru1 Ru4 Ru8 C802 55.3(4) . . . . ?
Ru2 Ru4 Ru8 C802 111.9(4) . . . . ?
C402 Ru4 Ru8 N5 -66.9(6) . . . . ?
C401 Ru4 Ru8 N5 53.4(6) . . . . ?
N1 Ru4 Ru8 N5 163.6(4) . . . . ?
O10 Ru4 Ru8 N5 -126.1(4) . . . . ?
O20 Ru4 Ru8 N5 128.0(4) . . . . ?
Ru1 Ru4 Ru8 N5 119.4(4) . . . . ?
Ru2 Ru4 Ru8 N5 175.9(4) . . . . ?
C402 Ru4 Ru8 O20 165.1(5) . . . . ?
C401 Ru4 Ru8 O20 -74.6(5) . . . . ?
N1 Ru4 Ru8 O20 35.6(3) . . . . ?
O10 Ru4 Ru8 O20 105.9(3) . . . . ?
N5 Ru4 Ru8 O20 -128.0(4) . . . . ?
Ru1 Ru4 Ru8 O20 -8.6(2) . . . . ?
Ru2 Ru4 Ru8 O20 48.0(2) . . . . ?
C402 Ru4 Ru8 O10 59.2(5) . . . . ?
C401 Ru4 Ru8 O10 179.4(5) . . . . ?
N1 Ru4 Ru8 O10 -70.3(3) . . . . ?
O20 Ru4 Ru8 O10 -105.9(3) . . . . ?
N5 Ru4 Ru8 O10 126.1(4) . . . . ?
Ru1 Ru4 Ru8 O10 -114.5(2) . . . . ?
Ru2 Ru4 Ru8 O10 -58.0(2) . . . . ?
C402 Ru4 Ru8 Ru5 -155.1(4) . . . . ?
C401 Ru4 Ru8 Ru5 -34.8(5) . . . . ?
N1 Ru4 Ru8 Ru5 75.4(2) . . . . ?
O10 Ru4 Ru8 Ru5 145.7(2) . . . . ?
O20 Ru4 Ru8 Ru5 39.8(2) . . . . ?
N5 Ru4 Ru8 Ru5 -88.2(4) . . . . ?
Ru1 Ru4 Ru8 Ru5 31.23(3) . . . . ?
Ru2 Ru4 Ru8 Ru5 87.76(4) . . . . ?
C402 Ru4 Ru8 Ru7 30.0(4) . . . . ?
C401 Ru4 Ru8 Ru7 150.3(5) . . . . ?
N1 Ru4 Ru8 Ru7 -99.5(2) . . . . ?
O10 Ru4 Ru8 Ru7 -29.2(2) . . . . ?
O20 Ru4 Ru8 Ru7 -135.1(2) . . . . ?
N5 Ru4 Ru8 Ru7 96.9(4) . . . . ?
Ru1 Ru4 Ru8 Ru7 -143.69(3) . . . . ?
Ru2 Ru4 Ru8 Ru7 -87.16(4) . . . . ?
C702 Ru7 Ru9 C903 36.2(6) . . . . ?
C701 Ru7 Ru9 C903 122.1(6) . . . . ?
N3 Ru7 Ru9 C903 -137.5(5) . . . . ?
O10 Ru7 Ru9 C903 -67.1(5) . . . . ?
Ru6 Ru7 Ru9 C903 -87.3(4) . . . . ?
Ru8 Ru7 Ru9 C903 -87.8(4) . . . . ?
C702 Ru7 Ru9 C902 114.4(15) . . . . ?
C701 Ru7 Ru9 C902 -159.7(15) . . . . ?
N3 Ru7 Ru9 C902 -59.3(15) . . . . ?
O10 Ru7 Ru9 C902 11.2(15) . . . . ?
Ru6 Ru7 Ru9 C902 -9.1(15) . . . . ?
Ru8 Ru7 Ru9 C902 -9.5(15) . . . . ?
C702 Ru7 Ru9 C901 -54.0(7) . . . . ?
C701 Ru7 Ru9 C901 31.9(7) . . . . ?
N3 Ru7 Ru9 C901 132.3(7) . . . . ?
O10 Ru7 Ru9 C901 -157.3(6) . . . . ?
Ru6 Ru7 Ru9 C901 -177.5(6) . . . . ?
Ru8 Ru7 Ru9 C901 -178.0(6) . . . . ?
C702 Ru7 Ru9 N4 -149.8(5) . . . . ?
C701 Ru7 Ru9 N4 -63.8(5) . . . . ?
N3 Ru7 Ru9 N4 36.5(4) . . . . ?
O10 Ru7 Ru9 N4 107.0(3) . . . . ?
Ru6 Ru7 Ru9 N4 86.7(3) . . . . ?
Ru8 Ru7 Ru9 N4 86.3(3) . . . . ?
C702 Ru7 Ru9 Ru6 123.5(4) . . . . ?
C701 Ru7 Ru9 Ru6 -150.6(4) . . . . ?
N3 Ru7 Ru9 Ru6 -50.2(3) . . . . ?
O10 Ru7 Ru9 Ru6 20.27(18) . . . . ?
Ru8 Ru7 Ru9 Ru6 -0.45(11) . . . . ?
C601 Ru6 Ru9 C903 -36.2(6) . . . . ?
C602 Ru6 Ru9 C903 -122.4(6) . . . . ?
N3 Ru6 Ru9 C903 138.5(5) . . . . ?
O10 Ru6 Ru9 C903 67.4(5) . . . . ?
Ru7 Ru6 Ru9 C903 87.6(4) . . . . ?
Ru2 Ru6 Ru9 C903 96.8(5) . . . . ?
C601 Ru6 Ru9 C902 53.3(6) . . . . ?
C602 Ru6 Ru9 C902 -32.8(6) . . . . ?
N3 Ru6 Ru9 C902 -132.0(5) . . . . ?
O10 Ru6 Ru9 C902 156.9(5) . . . . ?
Ru7 Ru6 Ru9 C902 177.1(5) . . . . ?
Ru2 Ru6 Ru9 C902 -173.7(5) . . . . ?
C601 Ru6 Ru9 C901 -114(2) . . . . ?
C602 Ru6 Ru9 C901 160(2) . . . . ?
N3 Ru6 Ru9 C901 60(2) . . . . ?
O10 Ru6 Ru9 C901 -11(2) . . . . ?
Ru7 Ru6 Ru9 C901 10(2) . . . . ?
Ru2 Ru6 Ru9 C901 19(2) . . . . ?
C601 Ru6 Ru9 N4 148.7(4) . . . . ?
C602 Ru6 Ru9 N4 62.6(5) . . . . ?
N3 Ru6 Ru9 N4 -36.6(3) . . . . ?
O10 Ru6 Ru9 N4 -107.7(3) . . . . ?
Ru7 Ru6 Ru9 N4 -87.5(2) . . . . ?
Ru2 Ru6 Ru9 N4 -78.3(3) . . . . ?
C601 Ru6 Ru9 Ru7 -123.8(4) . . . . ?
C602 Ru6 Ru9 Ru7 150.0(4) . . . . ?
N3 Ru6 Ru9 Ru7 50.9(2) . . . . ?
O10 Ru6 Ru9 Ru7 -20.25(18) . . . . ?
Ru2 Ru6 Ru9 Ru7 9.17(10) . . . . ?
C801 Ru8 C802 Ru5 -168.4(5) . . . . ?
C803 Ru8 C802 Ru5 104.8(5) . . . . ?
N5 Ru8 C802 Ru5 -73.4(4) . . . . ?
O20 Ru8 C802 Ru5 4.4(4) . . . . ?
O10 Ru8 C802 Ru5 -16.1(13) . . . . ?
Ru7 Ru8 C802 Ru5 -165.8(4) . . . . ?
Ru4 Ru8 C802 Ru5 -34.3(5) . . . . ?
C501 Ru5 C802 O802 -5.3(15) . . . . ?
C502 Ru5 C802 O802 78.6(15) . . . . ?
O20 Ru5 C802 O802 171.4(14) . . . . ?
N6 Ru5 C802 O802 -99.2(14) . . . . ?
Ru8 Ru5 C802 O802 175.8(17) . . . . ?
Ru1 Ru5 C802 O802 175.8(12) . . . . ?
C501 Ru5 C802 Ru8 178.9(5) . . . . ?
C502 Ru5 C802 Ru8 -97.2(5) . . . . ?
O20 Ru5 C802 Ru8 -4.5(4) . . . . ?
N6 Ru5 C802 Ru8 85.0(4) . . . . ?
Ru1 Ru5 C802 Ru8 0.0(7) . . . . ?
O20 Ru2 N1 C1 161.7(9) . . . . ?
Ru3 Ru2 N1 C1 56.7(8) . . . . ?
Ru1 Ru2 N1 C1 115.8(9) . . . . ?
Ru6 Ru2 N1 C1 -90.1(8) . . . . ?
Ru4 Ru2 N1 C1 -157.5(10) . . . . ?
C201 Ru2 N1 Ru4 136.6(4) . . . . ?
O20 Ru2 N1 Ru4 -40.8(3) . . . . ?
Ru3 Ru2 N1 Ru4 -145.9(3) . . . . ?
Ru1 Ru2 N1 Ru4 -86.7(3) . . . . ?
Ru6 Ru2 N1 Ru4 67.4(3) . . . . ?
C201 Ru2 N1 Ru1 -136.7(4) . . . . ?
O20 Ru2 N1 Ru1 45.8(2) . . . . ?
Ru3 Ru2 N1 Ru1 -59.19(19) . . . . ?
Ru6 Ru2 N1 Ru1 154.0(2) . . . . ?
Ru4 Ru2 N1 Ru1 86.7(3) . . . . ?
C402 Ru4 N1 C1 29.3(10) . . . . ?
C401 Ru4 N1 C1 -56.9(10) . . . . ?
O10 Ru4 N1 C1 123.7(9) . . . . ?
O20 Ru4 N1 C1 -163.0(10) . . . . ?
N5 Ru4 N1 C1 -164.2(8) . . . . ?
Ru1 Ru4 N1 C1 -118.9(10) . . . . ?
Ru8 Ru4 N1 C1 171.2(8) . . . . ?
Ru2 Ru4 N1 C1 153.3(11) . . . . ?
C402 Ru4 N1 Ru2 -124.0(4) . . . . ?
C401 Ru4 N1 Ru2 149.9(4) . . . . ?
O10 Ru4 N1 Ru2 -29.6(3) . . . . ?
O20 Ru4 N1 Ru2 43.7(3) . . . . ?
N5 Ru4 N1 Ru2 42.5(8) . . . . ?
Ru1 Ru4 N1 Ru2 87.8(3) . . . . ?
Ru8 Ru4 N1 Ru2 18.0(3) . . . . ?
C402 Ru4 N1 Ru1 148.2(4) . . . . ?
C401 Ru4 N1 Ru1 62.0(4) . . . . ?
O10 Ru4 N1 Ru1 -117.4(3) . . . . ?
O20 Ru4 N1 Ru1 -44.1(2) . . . . ?
N5 Ru4 N1 Ru1 -45.3(8) . . . . ?
Ru8 Ru4 N1 Ru1 -69.9(2) . . . . ?
Ru2 Ru4 N1 Ru1 -87.8(3) . . . . ?
C101 Ru1 N1 C1 18.3(8) . . . . ?
O20 Ru1 N1 C1 -176.7(7) . . . . ?
Ru3 Ru1 N1 C1 -65.1(7) . . . . ?
Ru4 Ru1 N1 C1 137.5(8) . . . . ?
Ru5 Ru1 N1 C1 171.7(6) . . . . ?
Ru2 Ru1 N1 C1 -125.4(8) . . . . ?
C101 Ru1 N1 Ru2 143.7(5) . . . . ?
O20 Ru1 N1 Ru2 -51.4(3) . . . . ?
Ru3 Ru1 N1 Ru2 60.2(2) . . . . ?
Ru4 Ru1 N1 Ru2 -97.2(3) . . . . ?
Ru5 Ru1 N1 Ru2 -63.0(3) . . . . ?
C101 Ru1 N1 Ru4 -119.1(5) . . . . ?
O20 Ru1 N1 Ru4 45.8(2) . . . . ?
Ru3 Ru1 N1 Ru4 157.4(3) . . . . ?
Ru5 Ru1 N1 Ru4 34.2(3) . . . . ?
Ru2 Ru1 N1 Ru4 97.2(3) . . . . ?
C303 Ru3 N2 C5 -173(2) . . . . ?
C302 Ru3 N2 C5 42.6(11) . . . . ?
C301 Ru3 N2 C5 -53.4(10) . . . . ?
Ru1 Ru3 N2 C5 138.3(10) . . . . ?
Ru2 Ru3 N2 C5 -155.1(10) . . . . ?
C303 Ru3 N2 C1 14(3) . . . . ?
C302 Ru3 N2 C1 -130.9(8) . . . . ?
C301 Ru3 N2 C1 133.1(8) . . . . ?
Ru1 Ru3 N2 C1 -35.2(7) . . . . ?
Ru2 Ru3 N2 C1 31.3(7) . . . . ?
C601 Ru6 N3 C11 92(3) . . . . ?
C602 Ru6 N3 C11 -21.3(9) . . . . ?
O10 Ru6 N3 C11 168.9(9) . . . . ?
Ru9 Ru6 N3 C11 60.8(8) . . . . ?
Ru7 Ru6 N3 C11 122.0(9) . . . . ?
Ru2 Ru6 N3 C11 -134.8(8) . . . . ?
C601 Ru6 N3 Ru7 -30(3) . . . . ?
C602 Ru6 N3 Ru7 -143.3(4) . . . . ?
O10 Ru6 N3 Ru7 46.9(3) . . . . ?
Ru9 Ru6 N3 Ru7 -61.2(2) . . . . ?
Ru2 Ru6 N3 Ru7 103.2(2) . . . . ?
C701 Ru7 N3 C11 28.6(9) . . . . ?
O10 Ru7 N3 C11 -163.1(9) . . . . ?
Ru9 Ru7 N3 C11 -54.1(8) . . . . ?
Ru6 Ru7 N3 C11 -116.3(9) . . . . ?
Ru8 Ru7 N3 C11 143.9(8) . . . . ?
C701 Ru7 N3 Ru6 144.8(5) . . . . ?
O10 Ru7 N3 Ru6 -46.9(3) . . . . ?
Ru9 Ru7 N3 Ru6 62.2(2) . . . . ?
Ru8 Ru7 N3 Ru6 -99.9(2) . . . . ?
C903 Ru9 N4 C11 -2(3) . . . . ?
C902 Ru9 N4 C11 125.1(9) . . . . ?
C901 Ru9 N4 C11 -138.5(9) . . . . ?
Ru7 Ru9 N4 C11 -36.6(7) . . . . ?
Ru6 Ru9 N4 C11 26.8(7) . . . . ?
C903 Ru9 N4 C15 -175(3) . . . . ?
C902 Ru9 N4 C15 -48.3(12) . . . . ?
C901 Ru9 N4 C15 48.0(12) . . . . ?
Ru7 Ru9 N4 C15 150.0(11) . . . . ?
Ru6 Ru9 N4 C15 -146.6(11) . . . . ?
C801 Ru8 N5 C21 97.3(9) . . . . ?
C802 Ru8 N5 C21 10.1(9) . . . . ?
O20 Ru8 N5 C21 -82.0(8) . . . . ?
O10 Ru8 N5 C21 -150.4(8) . . . . ?
Ru5 Ru8 N5 C21 -33.5(8) . . . . ?
Ru7 Ru8 N5 C21 164.6(8) . . . . ?
Ru4 Ru8 N5 C21 -116.0(9) . . . . ?
C801 Ru8 N5 Ru4 -146.6(4) . . . . ?
C802 Ru8 N5 Ru4 126.1(4) . . . . ?
O20 Ru8 N5 Ru4 34.1(3) . . . . ?
O10 Ru8 N5 Ru4 -34.4(3) . . . . ?
Ru5 Ru8 N5 Ru4 82.5(3) . . . . ?
Ru7 Ru8 N5 Ru4 -79.4(3) . . . . ?
C402 Ru4 N5 C21 -99.0(8) . . . . ?
C401 Ru4 N5 C21 -11.6(9) . . . . ?
N1 Ru4 N5 C21 94.5(10) . . . . ?
O10 Ru4 N5 C21 168.2(8) . . . . ?
O20 Ru4 N5 C21 93.4(8) . . . . ?
Ru1 Ru4 N5 C21 60.3(8) . . . . ?
Ru8 Ru4 N5 C21 128.6(9) . . . . ?
Ru2 Ru4 N5 C21 124.3(7) . . . . ?
C402 Ru4 N5 Ru8 132.5(4) . . . . ?
C401 Ru4 N5 Ru8 -140.2(4) . . . . ?
N1 Ru4 N5 Ru8 -34.0(8) . . . . ?
O10 Ru4 N5 Ru8 39.7(3) . . . . ?
O20 Ru4 N5 Ru8 -35.2(3) . . . . ?
Ru1 Ru4 N5 Ru8 -68.2(3) . . . . ?
Ru2 Ru4 N5 Ru8 -4.3(4) . . . . ?
C501 Ru5 N6 C21 -131.8(8) . . . . ?
C802 Ru5 N6 C21 -41.1(8) . . . . ?
O20 Ru5 N6 C21 52.3(7) . . . . ?
Ru8 Ru5 N6 C21 3.5(7) . . . . ?
Ru1 Ru5 N6 C21 97.6(7) . . . . ?
C501 Ru5 N6 C25 36.2(9) . . . . ?
C802 Ru5 N6 C25 126.9(9) . . . . ?
O20 Ru5 N6 C25 -139.7(8) . . . . ?
Ru8 Ru5 N6 C25 171.5(8) . . . . ?
Ru1 Ru5 N6 C25 -94.4(8) . . . . ?
C5 N2 C1 C2 -2.6(15) . . . . ?
Ru3 N2 C1 C2 171.7(9) . . . . ?
C5 N2 C1 N1 -177.2(9) . . . . ?
Ru3 N2 C1 N1 -2.9(11) . . . . ?
Ru2 N1 C1 N2 -47.0(11) . . . . ?
Ru4 N1 C1 N2 165.2(7) . . . . ?
Ru1 N1 C1 N2 56.3(10) . . . . ?
Ru2 N1 C1 C2 138.4(9) . . . . ?
Ru4 N1 C1 C2 -9.4(15) . . . . ?
Ru1 N1 C1 C2 -118.3(10) . . . . ?
N2 C1 C2 C3 3.8(17) . . . . ?
N1 C1 C2 C3 177.9(11) . . . . ?
C1 C2 C3 C4 -0.6(19) . . . . ?
C2 C3 C4 C5 -4(2) . . . . ?
C3 C4 C5 N2 5(2) . . . . ?
C3 C4 C5 C6 -178.6(13) . . . . ?
C1 N2 C5 C4 -1.9(17) . . . . ?
Ru3 N2 C5 C4 -175.2(9) . . . . ?
C1 N2 C5 C6 -178.3(12) . . . . ?
Ru3 N2 C5 C6 8.3(17) . . . . ?
C15 N4 C11 C12 6.3(17) . . . . ?
Ru9 N4 C11 C12 -168.0(9) . . . . ?
C15 N4 C11 N3 -177.1(10) . . . . ?
Ru9 N4 C11 N3 8.6(12) . . . . ?
Ru6 N3 C11 N4 -58.0(12) . . . . ?
Ru7 N3 C11 N4 40.4(13) . . . . ?
Ru6 N3 C11 C12 118.6(10) . . . . ?
Ru7 N3 C11 C12 -143.0(9) . . . . ?
N4 C11 C12 C13 -3.4(18) . . . . ?
N3 C11 C12 C13 -179.8(11) . . . . ?
C11 C12 C13 C14 -1(2) . . . . ?
C12 C13 C14 C15 2(2) . . . . ?
C11 N4 C15 C14 -5.1(18) . . . . ?
Ru9 N4 C15 C14 168.1(10) . . . . ?
C11 N4 C15 C16 174.8(15) . . . . ?
Ru9 N4 C15 C16 -12(2) . . . . ?
C13 C14 C15 N4 1(2) . . . . ?
C13 C14 C15 C16 -178.8(17) . . . . ?
C25 N6 C21 C22 -8.1(15) . . . . ?
Ru5 N6 C21 C22 160.4(9) . . . . ?
C25 N6 C21 N5 164.8(9) . . . . ?
Ru5 N6 C21 N5 -26.6(12) . . . . ?
Ru8 N5 C21 N6 46.2(12) . . . . ?
Ru4 N5 C21 N6 -60.9(10) . . . . ?
Ru8 N5 C21 C22 -140.7(10) . . . . ?
Ru4 N5 C21 C22 112.2(10) . . . . ?
N6 C21 C22 C23 4(2) . . . . ?
N5 C21 C22 C23 -168.9(13) . . . . ?
C21 C22 C23 C24 2(2) . . . . ?
C22 C23 C24 C25 -3(3) . . . . ?
C23 C24 C25 N6 -2(2) . . . . ?
C23 C24 C25 C26 175.9(14) . . . . ?
C21 N6 C25 C24 7.0(16) . . . . ?
Ru5 N6 C25 C24 -161.5(10) . . . . ?
C21 N6 C25 C26 -170.7(10) . . . . ?
Ru5 N6 C25 C26 20.8(14) . . . . ?
 
_diffrn_measured_fraction_theta_max    0.988
_diffrn_reflns_theta_full              23.33
_diffrn_measured_fraction_theta_full   0.988
_refine_diff_density_max    0.921
_refine_diff_density_min   -0.899
_refine_diff_density_rms    0.183

#===END

data_6_(pg106ff7f2)

 
_audit_creation_method            SHELXL-97
_chemical_name_systematic
;
 ?
;
_chemical_name_common             ?
_chemical_melting_point           ?
_chemical_formula_moiety          
 'C39 H20 N6 O23 Ru9'
_chemical_formula_sum
 'C39 H20 N6 O23 Ru9'
_chemical_formula_weight          1850.24
_chemical_compound_source
;
Synthesis. 
;
 
loop_
 _atom_type_symbol
 _atom_type_description
 _atom_type_scat_dispersion_real
 _atom_type_scat_dispersion_imag
 _atom_type_scat_source
 'C'  'C'   0.0180   0.0090
 'International Tables Vol C Tables 4.2.6.8 and 6.1.1.4'
 'H'  'H'   0.0000   0.0000
 'International Tables Vol C Tables 4.2.6.8 and 6.1.1.4'
 'N'  'N'   0.0310   0.0180
 'International Tables Vol C Tables 4.2.6.8 and 6.1.1.4'
 'O'  'O'   0.0490   0.0320
 'International Tables Vol C Tables 4.2.6.8 and 6.1.1.4'
 'Ru'  'Ru'   0.0550   3.2960
 'International Tables Vol C Tables 4.2.6.8 and 6.1.1.4'
 
_symmetry_cell_setting            'triclinic'
_symmetry_space_group_name_H-M    'P -1'
_symmetry_space_group_name_Hall    '-P 1'
 
loop_
 _symmetry_equiv_pos_as_xyz
 'x, y, z'
 '-x, -y, -z'
 
_cell_length_a                    12.6444(3)
_cell_length_b                    13.3104(2)
_cell_length_c                    18.7836(3)
_cell_angle_alpha                 87.7410(10)
_cell_angle_beta                  87.4010(10)
_cell_angle_gamma                 75.3150(10)
_cell_volume                      3053.63(10)
_cell_formula_units_Z             2
_cell_measurement_temperature     200(2)
_cell_measurement_reflns_used     ?
_cell_measurement_theta_min       ?
_cell_measurement_theta_max       ?
 
_exptl_crystal_description        'prism'
_exptl_crystal_colour             'black'
_exptl_crystal_size_max           0.15
_exptl_crystal_size_mid           0.10
_exptl_crystal_size_min           0.10
_exptl_crystal_density_meas       ?
_exptl_crystal_density_diffrn     2.012
_exptl_crystal_density_method     'not measured'
_exptl_crystal_F_000              1752
_exptl_absorpt_coefficient_mu     18.146
_exptl_absorpt_correction_type       refdelf
_exptl_absorpt_process_details
;
Parkin S,Moezzi B & Hope H, (1995) J. Appl. Cryst. 28, 53-56
Cubic fit to sin(theta)/lambda - 24 parameters
;
_exptl_absorpt_correction_T_min      0.175
_exptl_absorpt_correction_T_max      0.155
 
_exptl_special_details
;
 ?
;
 
_diffrn_ambient_temperature       200(2)
_diffrn_radiation_wavelength      1.54178
_diffrn_radiation_type            CuK\a
_diffrn_radiation_source          'fine-focus sealed tube'
_diffrn_measurement_device_type  'KappaCCD'
_diffrn_measurement_device  '95mm CCD camera on \k-goniostat'
_diffrn_detector_area_resol_mean    9
_diffrn_radiation_monochromator        'horizontally mounted graphite crystal'
_diffrn_measurement_method       'CCD'
_diffrn_standards_number          ?
_diffrn_standards_interval_count  ?
_diffrn_standards_interval_time   ?
_diffrn_standards_decay_%         ?
_diffrn_reflns_number             18221
_diffrn_reflns_av_R_equivalents   0.0000
_diffrn_reflns_av_sigmaI/netI     0.0440
_diffrn_reflns_limit_h_min        0
_diffrn_reflns_limit_h_max        15
_diffrn_reflns_limit_k_min        -15
_diffrn_reflns_limit_k_max        16
_diffrn_reflns_limit_l_min        -22
_diffrn_reflns_limit_l_max        22
_diffrn_reflns_theta_min          3.43
_diffrn_reflns_theta_max          68.54
_reflns_number_total              11112
_reflns_number_gt                 9636
_reflns_threshold_expression      >2sigma(I)
 
_computing_data_collection        'Collect (Nonius BV, 1997-2000)'
_computing_cell_refinement 
'HKL Scalepack (Otwinowski & Minor 1997)'
_computing_data_reduction 
'HKL Denzo and Scalepack (Otwinowski & Minor 1997)'
_computing_structure_solution     'DIRDIF-96 (Beurskens et al., 1996)'
_computing_structure_refinement   'SHELXL-97 (Sheldrick, 1997)'
_computing_molecular_graphics     'EUCLID (Spek, 1982)'
_computing_publication_material   'SHELXL-97 (Sheldrick, 1997)'
 
 
_refine_special_details
;
 Refinement of F^2^ against ALL reflections.  The weighted R-factor wR and
 goodness of fit S are based on F^2^, conventional R-factors R are based
 on F, with F set to zero for negative F^2^. The threshold expression of
 F^2^ > 2sigma(F^2^) is used only for calculating R-factors(gt) etc. and is
 not relevant to the choice of reflections for refinement.  R-factors based
 on F^2^ are statistically about twice as large as those based on F, and R-
 factors based on ALL data will be even larger.
;
 
_refine_ls_structure_factor_coef  Fsqd
_refine_ls_matrix_type            full
_refine_ls_weighting_scheme       calc
_refine_ls_weighting_details
 'calc w=1/[\s^2^(Fo^2^)+(0.0621P)^2^+6.4922P] where P=(Fo^2^+2Fc^2^)/3'
_atom_sites_solution_primary      direct
_atom_sites_solution_secondary    difmap
_atom_sites_solution_hydrogens    geom
_refine_ls_hydrogen_treatment     mixed
_refine_ls_extinction_method      none
_refine_ls_extinction_coef        ?
_refine_ls_number_reflns          11112
_refine_ls_number_parameters      702
_refine_ls_number_restraints      0
_refine_ls_R_factor_all           0.0468
_refine_ls_R_factor_gt            0.0394
_refine_ls_wR_factor_ref          0.1128
_refine_ls_wR_factor_gt           0.1086
_refine_ls_goodness_of_fit_ref    1.040
_refine_ls_restrained_S_all       1.040
_refine_ls_shift/su_max           0.001
_refine_ls_shift/su_mean          0.000
 
loop_
 _atom_site_label
 _atom_site_type_symbol
 _atom_site_fract_x
 _atom_site_fract_y
 _atom_site_fract_z
 _atom_site_U_iso_or_equiv
 _atom_site_adp_type
 _atom_site_occupancy
 _atom_site_symmetry_multiplicity
 _atom_site_calc_flag
 _atom_site_refinement_flags
 _atom_site_disorder_assembly
 _atom_site_disorder_group
C1 C 0.9236(5) 0.5870(4) 0.7215(3) 0.0433(14) Uani 1 1 d . . .
C2 C 0.9826(6) 0.5036(5) 0.7610(4) 0.0553(17) Uani 1 1 d . . .
H2 H 1.0238 0.5140 0.7985 0.066 Uiso 1 1 calc R . .
C3 C 0.9795(7) 0.4037(5) 0.7438(4) 0.063(2) Uani 1 1 d . . .
H3 H 1.0187 0.3465 0.7699 0.076 Uiso 1 1 calc R . .
C4 C 0.9191(8) 0.3903(6) 0.6892(4) 0.068(2) Uani 1 1 d . . .
H4 H 0.9151 0.3237 0.6786 0.082 Uiso 1 1 calc R . .
C5 C 0.8636(7) 0.4740(5) 0.6491(4) 0.0578(18) Uani 1 1 d . . .
C6 C 0.7953(9) 0.4575(7) 0.5893(5) 0.088(3) Uani 1 1 d . . .
H6A H 0.8070 0.3844 0.5823 0.132 Uiso 1 1 calc R . .
H6B H 0.8158 0.4905 0.5464 0.132 Uiso 1 1 calc R . .
H6C H 0.7194 0.4871 0.6012 0.132 Uiso 1 1 calc R . .
C11 C 0.7564(5) 0.5673(4) 0.9240(3) 0.0411(14) Uani 1 1 d . . .
C12 C 0.7655(6) 0.4718(5) 0.8939(5) 0.0603(19) Uani 1 1 d . . .
H12 H 0.7992 0.4572 0.8492 0.072 Uiso 1 1 calc R . .
C13 C 0.7234(7) 0.3991(6) 0.9317(5) 0.074(2) Uani 1 1 d . . .
H13 H 0.7279 0.3351 0.9120 0.089 Uiso 1 1 calc R . .
C14 C 0.6757(7) 0.4200(6) 0.9972(5) 0.066(2) Uani 1 1 d . . .
H14 H 0.6489 0.3700 1.0229 0.079 Uiso 1 1 calc R . .
C15 C 0.6671(6) 0.5162(5) 1.0256(4) 0.0560(18) Uani 1 1 d . . .
C16 C 0.6168(7) 0.5388(7) 1.0982(5) 0.074(2) Uani 1 1 d . . .
H16A H 0.6109 0.4751 1.1220 0.111 Uiso 1 1 calc R . .
H16B H 0.5453 0.5850 1.0945 0.111 Uiso 1 1 calc R . .
H16C H 0.6617 0.5707 1.1249 0.111 Uiso 1 1 calc R . .
C21 C 1.1166(5) 0.9214(4) 0.8178(3) 0.0393(13) Uani 1 1 d . . .
C22 C 1.2027(5) 0.9187(6) 0.8615(4) 0.0537(17) Uani 1 1 d . . .
H22 H 1.1927 0.9149 0.9107 0.064 Uiso 1 1 calc R . .
C23 C 1.3017(6) 0.9215(8) 0.8319(5) 0.076(2) Uani 1 1 d . . .
H23 H 1.3595 0.9223 0.8605 0.091 Uiso 1 1 calc R . .
C24 C 1.3151(6) 0.9231(7) 0.7603(5) 0.076(2) Uani 1 1 d . . .
H24 H 1.3837 0.9212 0.7396 0.091 Uiso 1 1 calc R . .
C25 C 1.2280(5) 0.9276(5) 0.7175(4) 0.0546(17) Uani 1 1 d . . .
C26 C 1.2456(7) 0.9209(8) 0.6370(4) 0.078(2) Uani 1 1 d . . .
H26A H 1.2832 0.9718 0.6198 0.117 Uiso 1 1 calc R . .
H26B H 1.1761 0.9339 0.6151 0.117 Uiso 1 1 calc R . .
H26C H 1.2886 0.8527 0.6253 0.117 Uiso 1 1 calc R . .
C101 C 1.0155(6) 0.8494(5) 0.5743(4) 0.0548(17) Uani 1 1 d . . .
C102 C 1.0696(6) 0.6606(6) 0.6100(4) 0.0559(17) Uani 1 1 d . . .
C201 C 0.6753(6) 0.7166(6) 0.7327(4) 0.0553(17) Uani 1 1 d . . .
C202 C 0.6472(6) 0.9110(5) 0.7010(4) 0.0526(16) Uani 1 1 d . . .
C301 C 0.8826(7) 0.6544(6) 0.5117(4) 0.063(2) Uani 1 1 d . . .
C302 C 0.6689(8) 0.7008(7) 0.5772(5) 0.073(2) Uani 1 1 d . . .
C303 C 0.7744(7) 0.8492(6) 0.5548(4) 0.0606(19) Uani 1 1 d . . .
C401 C 0.8331(5) 1.0686(5) 0.9023(3) 0.0410(13) Uani 1 1 d . . .
C402 C 0.7183(5) 1.0705(5) 0.7941(4) 0.0474(15) Uani 1 1 d . . .
C403 C 0.9185(5) 1.0982(5) 0.7687(3) 0.0433(14) Uani 1 1 d . . .
C501 C 1.0424(6) 1.0985(6) 0.6411(4) 0.0596(18) Uani 1 1 d . . .
C502 C 0.8520(6) 1.0663(5) 0.6345(4) 0.0518(16) Uani 1 1 d . . .
C601 C 0.5826(5) 0.9233(5) 0.8707(4) 0.0448(15) Uani 1 1 d . . .
C602 C 0.5553(5) 0.7375(5) 0.8794(4) 0.0488(15) Uani 1 1 d . . .
C701 C 0.9294(5) 0.6453(5) 1.0165(4) 0.0480(15) Uani 1 1 d . . .
C702 C 0.9200(5) 0.8374(5) 0.9968(3) 0.0426(14) Uani 1 1 d . . .
C801 C 1.0479(5) 0.6661(5) 0.8804(4) 0.0465(15) Uani 1 1 d . . .
C802 C 1.1271(5) 0.7162(5) 0.7675(4) 0.0476(15) Uani 1 1 d . . .
C901 C 0.7291(7) 0.7343(7) 1.1132(5) 0.073(2) Uani 1 1 d . . .
C902 C 0.5304(6) 0.7767(5) 1.0401(4) 0.0556(17) Uani 1 1 d . . .
C903 C 0.6740(5) 0.8990(6) 1.0143(3) 0.0477(15) Uani 1 1 d . . .
N1 N 0.9150(4) 0.6897(3) 0.7368(2) 0.0355(10) Uani 1 1 d . . .
N2 N 0.8672(5) 0.5730(4) 0.6641(3) 0.0468(12) Uani 1 1 d . . .
N3 N 0.7947(4) 0.6453(4) 0.8883(3) 0.0372(11) Uani 1 1 d . . .
N4 N 0.7058(4) 0.5911(4) 0.9885(3) 0.0422(12) Uani 1 1 d . . .
N5 N 1.0187(4) 0.9039(4) 0.8477(3) 0.0350(10) Uani 1 1 d . . .
N6 N 1.1262(4) 0.9338(4) 0.7467(3) 0.0404(11) Uani 1 1 d . . .
O10 O 0.8254(3) 0.8350(3) 0.85160(19) 0.0307(8) Uani 1 1 d . . .
O20 O 0.9026(3) 0.8842(3) 0.73013(19) 0.0322(8) Uani 1 1 d . . .
O101 O 1.0396(6) 0.8821(5) 0.5191(3) 0.0845(18) Uani 1 1 d . . .
O102 O 1.1271(5) 0.5896(5) 0.5853(3) 0.0873(19) Uani 1 1 d . . .
O201 O 0.6209(6) 0.6592(5) 0.7317(3) 0.089(2) Uani 1 1 d . . .
O202 O 0.5722(5) 0.9692(5) 0.6803(4) 0.0876(19) Uani 1 1 d . . .
O301 O 0.9262(6) 0.6218(5) 0.4614(3) 0.125(2) Uani 1 1 d . . .
O302 O 0.5861(6) 0.6976(8) 0.5628(4) 0.095(3) Uani 1 1 d . . .
O303 O 0.7509(6) 0.9282(5) 0.5269(4) 0.095(2) Uani 1 1 d . . .
O401 O 0.8196(4) 1.1203(4) 0.9497(3) 0.0609(12) Uani 1 1 d . . .
O402 O 0.6403(4) 1.1287(4) 0.7776(3) 0.0781(17) Uani 1 1 d . . .
O403 O 0.9268(5) 1.1823(4) 0.7775(3) 0.0719(16) Uani 1 1 d . . .
O501 O 1.0794(6) 1.1614(4) 0.6164(4) 0.0866(19) Uani 1 1 d . . .
O502 O 0.7773(5) 1.1129(5) 0.6068(4) 0.0867(19) Uani 1 1 d . . .
O601 O 0.5229(4) 1.0032(4) 0.8717(3) 0.0752(14) Uani 1 1 d . . .
O602 O 0.4817(4) 0.7009(5) 0.8836(3) 0.0750(16) Uani 1 1 d . . .
O701 O 0.9661(5) 0.5887(4) 1.0613(3) 0.0755(16) Uani 1 1 d . . .
O702 O 0.9437(4) 0.8963(4) 1.0309(3) 0.0681(14) Uani 1 1 d . . .
O801 O 1.1139(4) 0.6018(4) 0.9059(3) 0.0712(16) Uani 1 1 d . . .
O802 O 1.2164(4) 0.6796(4) 0.7511(3) 0.0729(15) Uani 1 1 d . . .
O901 O 0.7603(8) 0.7297(8) 1.1676(4) 0.0880(13) Uani 1 1 d . . .
O902 O 0.4402(4) 0.7913(4) 1.0531(4) 0.0810(18) Uani 1 1 d . . .
O903 O 0.6673(4) 0.9844(4) 1.0143(3) 0.0670(14) Uani 1 1 d . . .
H30 H 0.816(5) 0.626(4) 0.847(3) 0.046(15) Uiso 1 1 d . . .
H50 H 1.018(4) 0.895(4) 0.893(3) 0.049(13) Uiso 1 1 d . . .
Ru1 Ru 0.97942(4) 0.77402(3) 0.65351(2) 0.03852(12) Uani 1 1 d . . .
Ru2 Ru 0.76778(4) 0.80324(3) 0.72714(2) 0.03661(12) Uani 1 1 d . . .
Ru3 Ru 0.81048(4) 0.71643(4) 0.59842(3) 0.04697(14) Uani 1 1 d . . .
Ru4 Ru 0.85704(3) 0.99067(3) 0.82113(2) 0.03242(11) Uani 1 1 d . . .
Ru5 Ru 0.97717(4) 1.00000(3) 0.68515(3) 0.03986(12) Uani 1 1 d . . .
Ru6 Ru 0.67598(3) 0.79099(3) 0.87239(2) 0.03398(11) Uani 1 1 d . . .
Ru7 Ru 0.87575(3) 0.74084(3) 0.94366(2) 0.03453(11) Uani 1 1 d . . .
Ru8 Ru 0.98686(3) 0.76620(3) 0.80694(2) 0.03116(11) Uani 1 1 d . . .
Ru9 Ru 0.68308(4) 0.75530(4) 1.01553(3) 0.04074(12) Uani 1 1 d . . .
 
loop_
 _atom_site_aniso_label
 _atom_site_aniso_U_11
 _atom_site_aniso_U_22
 _atom_site_aniso_U_33
 _atom_site_aniso_U_23
 _atom_site_aniso_U_13
 _atom_site_aniso_U_12
C1 0.057(4) 0.037(3) 0.040(3) -0.009(3) 0.005(3) -0.018(3)
C2 0.068(4) 0.035(3) 0.059(4) -0.004(3) 0.002(4) -0.007(3)
C3 0.086(6) 0.031(3) 0.068(5) -0.001(3) 0.006(4) -0.007(3)
C4 0.108(7) 0.040(4) 0.059(5) -0.014(3) 0.011(5) -0.026(4)
C5 0.086(5) 0.050(4) 0.045(4) -0.012(3) 0.010(4) -0.032(4)
C6 0.131(9) 0.081(6) 0.071(6) -0.027(5) 0.001(6) -0.057(6)
C11 0.040(3) 0.034(3) 0.050(4) 0.003(3) -0.001(3) -0.012(2)
C12 0.067(5) 0.042(4) 0.074(5) -0.004(3) 0.013(4) -0.018(3)
C13 0.079(6) 0.042(4) 0.105(7) -0.006(4) 0.007(5) -0.026(4)
C14 0.075(5) 0.047(4) 0.080(6) 0.012(4) 0.001(4) -0.028(4)
C15 0.050(4) 0.057(4) 0.061(5) 0.021(3) -0.002(3) -0.017(3)
C16 0.079(6) 0.071(5) 0.069(6) 0.018(4) 0.014(4) -0.017(4)
C21 0.034(3) 0.034(3) 0.051(4) -0.007(3) 0.002(3) -0.010(2)
C22 0.039(3) 0.070(4) 0.056(4) -0.013(3) -0.007(3) -0.018(3)
C23 0.043(4) 0.115(7) 0.078(6) -0.022(5) -0.007(4) -0.033(4)
C24 0.034(4) 0.103(6) 0.094(7) -0.016(5) 0.014(4) -0.022(4)
C25 0.041(4) 0.058(4) 0.063(5) -0.006(3) 0.011(3) -0.012(3)
C26 0.058(5) 0.111(7) 0.061(5) -0.003(5) 0.024(4) -0.019(5)
C101 0.065(4) 0.054(4) 0.046(4) -0.004(3) 0.000(3) -0.017(3)
C102 0.062(4) 0.053(4) 0.051(4) -0.008(3) 0.005(3) -0.011(4)
C201 0.062(4) 0.068(5) 0.042(4) -0.011(3) 0.002(3) -0.026(4)
C202 0.043(4) 0.058(4) 0.056(4) -0.009(3) -0.006(3) -0.010(3)
C301 0.093(6) 0.062(4) 0.038(4) -0.005(3) -0.002(4) -0.028(4)
C302 0.074(6) 0.099(6) 0.056(5) -0.004(4) -0.016(4) -0.035(5)
C303 0.074(5) 0.068(5) 0.039(4) 0.002(3) -0.009(3) -0.015(4)
C401 0.035(3) 0.038(3) 0.047(4) -0.007(3) 0.001(3) -0.004(2)
C402 0.046(4) 0.040(3) 0.054(4) -0.001(3) 0.001(3) -0.007(3)
C403 0.048(3) 0.035(3) 0.046(4) 0.002(3) 0.005(3) -0.011(3)
C501 0.058(4) 0.057(4) 0.064(5) 0.007(4) 0.006(4) -0.018(4)
C502 0.061(4) 0.052(4) 0.042(4) 0.005(3) 0.003(3) -0.016(3)
C601 0.027(3) 0.051(4) 0.056(4) -0.004(3) -0.003(3) -0.009(3)
C602 0.048(4) 0.052(4) 0.049(4) 0.005(3) -0.004(3) -0.018(3)
C701 0.052(4) 0.042(3) 0.046(4) 0.007(3) -0.003(3) -0.005(3)
C702 0.034(3) 0.057(4) 0.037(3) 0.005(3) -0.001(2) -0.013(3)
C801 0.042(3) 0.045(3) 0.049(4) 0.008(3) -0.009(3) -0.006(3)
C802 0.041(4) 0.043(3) 0.053(4) -0.004(3) 0.001(3) -0.001(3)
C901 0.074(5) 0.101(6) 0.048(5) 0.005(4) 0.001(4) -0.029(5)
C902 0.059(5) 0.047(4) 0.062(5) -0.005(3) 0.010(3) -0.016(3)
C903 0.044(3) 0.057(4) 0.043(4) -0.018(3) 0.006(3) -0.013(3)
N1 0.047(3) 0.030(2) 0.029(2) -0.0034(19) -0.001(2) -0.008(2)
N2 0.063(3) 0.043(3) 0.039(3) -0.009(2) 0.006(2) -0.023(3)
N3 0.038(3) 0.035(3) 0.036(3) -0.001(2) 0.004(2) -0.006(2)
N4 0.040(3) 0.037(3) 0.049(3) 0.008(2) 0.000(2) -0.010(2)
N5 0.037(3) 0.036(3) 0.032(3) -0.003(2) -0.002(2) -0.008(2)
N6 0.037(3) 0.047(3) 0.040(3) -0.002(2) 0.003(2) -0.016(2)
O10 0.0275(18) 0.0290(18) 0.035(2) 0.0014(15) 0.0004(15) -0.0066(15)
O20 0.0361(19) 0.0285(18) 0.033(2) 0.0022(15) -0.0015(16) -0.0100(15)
O101 0.121(5) 0.086(4) 0.049(3) 0.004(3) 0.015(3) -0.035(4)
O102 0.091(4) 0.071(4) 0.084(4) -0.028(3) 0.021(3) 0.008(3)
O201 0.106(5) 0.119(5) 0.074(4) -0.029(4) 0.014(3) -0.084(4)
O202 0.056(3) 0.093(4) 0.099(5) 0.007(4) -0.028(3) 0.013(3)
O301 0.136(6) 0.100(5) 0.051(4) -0.024(3) 0.025(4) -0.035(4)
O302 0.087(5) 0.205(9) 0.103(6) -0.009(6) -0.029(4) -0.071(6)
O303 0.130(6) 0.075(4) 0.072(4) 0.021(3) -0.025(4) -0.010(4)
O401 0.065(3) 0.056(3) 0.060(3) -0.021(3) 0.003(2) -0.011(2)
O402 0.047(3) 0.070(3) 0.103(5) 0.011(3) -0.013(3) 0.012(3)
O403 0.110(4) 0.041(3) 0.071(4) -0.010(2) 0.022(3) -0.034(3)
O501 0.106(5) 0.073(4) 0.091(5) 0.015(3) 0.025(4) -0.049(4)
O502 0.072(4) 0.089(4) 0.084(4) 0.016(3) -0.025(3) 0.006(3)
O601 0.043(3) 0.049(3) 0.097(4) -0.003(3) -0.002(3) 0.003(2)
O602 0.057(3) 0.097(4) 0.086(4) 0.006(3) -0.008(3) -0.048(3)
O701 0.085(4) 0.073(3) 0.062(3) 0.028(3) -0.013(3) -0.011(3)
O702 0.068(3) 0.073(3) 0.071(4) -0.021(3) -0.013(3) -0.027(3)
O801 0.050(3) 0.070(3) 0.072(4) 0.026(3) 0.000(3) 0.018(3)
O802 0.044(3) 0.077(4) 0.085(4) -0.018(3) 0.008(3) 0.009(3)
O901 0.146(7) 0.196(9) 0.045(4) 0.004(4) -0.031(4) -0.042(6)
O902 0.043(3) 0.076(4) 0.120(5) -0.010(3) 0.024(3) -0.012(3)
O903 0.070(3) 0.053(3) 0.081(4) -0.021(3) 0.007(3) -0.019(3)
Ru1 0.0444(3) 0.0377(2) 0.0333(2) -0.00309(18) 0.00169(19) -0.0105(2)
Ru2 0.0360(2) 0.0390(2) 0.0361(2) -0.00313(18) -0.00299(18) -0.01122(19)
Ru3 0.0577(3) 0.0527(3) 0.0342(3) -0.0051(2) -0.0055(2) -0.0195(2)
Ru4 0.0309(2) 0.0279(2) 0.0371(2) -0.00172(17) -0.00090(17) -0.00498(16)
Ru5 0.0434(3) 0.0375(2) 0.0390(3) 0.00407(19) 0.00076(19) -0.01185(19)
Ru6 0.0289(2) 0.0356(2) 0.0380(2) 0.00041(18) -0.00196(17) -0.00915(17)
Ru7 0.0321(2) 0.0356(2) 0.0348(2) 0.00267(18) -0.00312(17) -0.00686(18)
Ru8 0.0296(2) 0.0288(2) 0.0334(2) -0.00096(17) -0.00218(17) -0.00402(16)
Ru9 0.0382(2) 0.0467(3) 0.0373(3) -0.0014(2) 0.00314(19) -0.0114(2)
 
_geom_special_details
;
 All esds (except the esd in the dihedral angle between two l.s. planes)
 are estimated using the full covariance matrix.  The cell esds are taken
 into account individually in the estimation of esds in distances, angles
 and torsion angles; correlations between esds in cell parameters are only
 used when they are defined by crystal symmetry.  An approximate (isotropic)
 treatment of cell esds is used for estimating esds involving l.s. planes.
;
 
loop_
 _geom_bond_atom_site_label_1
 _geom_bond_atom_site_label_2
 _geom_bond_distance
 _geom_bond_site_symmetry_2
 _geom_bond_publ_flag
C1 N2 1.364(8) . ?
C1 C2 1.380(9) . ?
C1 N1 1.385(7) . ?
C2 C3 1.391(9) . ?
C2 H2 0.9300 . ?
C3 C4 1.350(12) . ?
C3 H3 0.9300 . ?
C4 C5 1.373(11) . ?
C4 H4 0.9300 . ?
C5 N2 1.370(8) . ?
C5 C6 1.503(11) . ?
C6 H6A 0.9600 . ?
C6 H6B 0.9600 . ?
C6 H6C 0.9600 . ?
C11 N4 1.354(8) . ?
C11 C12 1.387(9) . ?
C11 N3 1.391(7) . ?
C12 C13 1.377(10) . ?
C12 H12 0.9300 . ?
C13 C14 1.352(12) . ?
C13 H13 0.9300 . ?
C14 C15 1.385(11) . ?
C14 H14 0.9300 . ?
C15 N4 1.371(8) . ?
C15 C16 1.486(11) . ?
C16 H16A 0.9600 . ?
C16 H16B 0.9600 . ?
C16 H16C 0.9600 . ?
C21 N6 1.342(8) . ?
C21 C22 1.384(9) . ?
C21 N5 1.405(7) . ?
C22 C23 1.355(10) . ?
C22 H22 0.9300 . ?
C23 C24 1.346(12) . ?
C23 H23 0.9300 . ?
C24 C25 1.381(11) . ?
C24 H24 0.9300 . ?
C25 N6 1.361(8) . ?
C25 C26 1.521(11) . ?
C26 H26A 0.9600 . ?
C26 H26B 0.9600 . ?
C26 H26C 0.9600 . ?
C101 O101 1.167(9) . ?
C101 Ru1 1.866(7) . ?
C102 O102 1.137(8) . ?
C102 Ru1 1.841(7) . ?
C201 O201 1.152(8) . ?
C201 Ru2 1.836(7) . ?
C202 O202 1.135(8) . ?
C202 Ru2 1.878(7) . ?
C301 O301 1.117(9) . ?
C301 Ru3 1.939(8) . ?
C302 O302 1.104(10) . ?
C302 Ru3 1.915(9) . ?
C303 O303 1.131(9) . ?
C303 Ru3 1.875(8) . ?
C401 O401 1.127(7) . ?
C401 Ru4 1.849(6) . ?
C402 O402 1.136(8) . ?
C402 Ru4 1.887(7) . ?
C403 O403 1.169(7) . ?
C403 Ru4 2.001(6) . ?
C403 Ru5 2.070(6) . ?
C501 O501 1.133(8) . ?
C501 Ru5 1.867(7) . ?
C502 O502 1.127(9) . ?
C502 Ru5 1.884(8) . ?
C601 O601 1.137(7) . ?
C601 Ru6 1.856(6) . ?
C602 O602 1.153(8) . ?
C602 Ru6 1.838(7) . ?
C701 O701 1.139(8) . ?
C701 Ru7 1.860(6) . ?
C702 O702 1.137(8) . ?
C702 Ru7 1.865(7) . ?
C801 O801 1.140(7) . ?
C801 Ru8 1.925(6) . ?
C801 Ru7 2.429(7) . ?
C802 O802 1.144(8) . ?
C802 Ru8 1.859(6) . ?
C901 O901 1.105(10) . ?
C901 Ru9 1.938(9) . ?
C902 O902 1.124(9) . ?
C902 Ru9 1.917(7) . ?
C903 O903 1.118(8) . ?
C903 Ru9 1.887(7) . ?
N1 Ru8 2.068(5) . ?
N1 Ru2 2.089(5) . ?
N1 Ru1 2.140(5) . ?
N2 Ru3 2.209(5) . ?
N3 Ru7 2.147(5) . ?
N3 Ru6 2.150(5) . ?
N3 H30 0.83(6) . ?
N4 Ru9 2.208(5) . ?
N5 Ru4 2.148(5) . ?
N5 Ru8 2.150(5) . ?
N5 H50 0.86(6) . ?
N6 Ru5 2.223(5) . ?
O10 Ru7 2.119(3) . ?
O10 Ru6 2.131(3) . ?
O10 Ru8 2.160(3) . ?
O10 Ru4 2.256(3) . ?
O20 Ru1 2.118(4) . ?
O20 Ru5 2.131(3) . ?
O20 Ru8 2.190(3) . ?
O20 Ru4 2.224(4) . ?
O20 Ru2 2.240(3) . ?
Ru1 Ru3 2.7046(7) . ?
Ru1 Ru8 2.8847(6) . ?
Ru1 Ru2 2.8990(6) . ?
Ru1 Ru5 3.0818(6) . ?
Ru2 Ru3 2.6941(7) . ?
Ru2 Ru6 2.9312(6) . ?
Ru2 Ru8 3.1287(6) . ?
Ru4 Ru5 2.9267(6) . ?
Ru4 Ru8 3.0379(6) . ?
Ru6 Ru9 2.7134(6) . ?
Ru6 Ru7 2.8284(6) . ?
Ru7 Ru9 2.6979(6) . ?
Ru7 Ru8 2.9203(6) . ?
 
loop_
 _geom_angle_atom_site_label_1
 _geom_angle_atom_site_label_2
 _geom_angle_atom_site_label_3
 _geom_angle
 _geom_angle_site_symmetry_1
 _geom_angle_site_symmetry_3
 _geom_angle_publ_flag
N2 C1 C2 121.3(6) . . ?
N2 C1 N1 114.9(5) . . ?
C2 C1 N1 123.8(6) . . ?
C1 C2 C3 119.0(7) . . ?
C1 C2 H2 120.5 . . ?
C3 C2 H2 120.5 . . ?
C4 C3 C2 119.5(7) . . ?
C4 C3 H3 120.2 . . ?
C2 C3 H3 120.2 . . ?
C3 C4 C5 120.6(7) . . ?
C3 C4 H4 119.7 . . ?
C5 C4 H4 119.7 . . ?
N2 C5 C4 120.9(7) . . ?
N2 C5 C6 119.3(7) . . ?
C4 C5 C6 119.8(7) . . ?
C5 C6 H6A 109.5 . . ?
C5 C6 H6B 109.5 . . ?
H6A C6 H6B 109.5 . . ?
C5 C6 H6C 109.5 . . ?
H6A C6 H6C 109.5 . . ?
H6B C6 H6C 109.5 . . ?
N4 C11 C12 121.8(6) . . ?
N4 C11 N3 116.3(5) . . ?
C12 C11 N3 121.8(6) . . ?
C13 C12 C11 118.6(8) . . ?
C13 C12 H12 120.7 . . ?
C11 C12 H12 120.7 . . ?
C14 C13 C12 120.6(7) . . ?
C14 C13 H13 119.7 . . ?
C12 C13 H13 119.7 . . ?
C13 C14 C15 119.5(7) . . ?
C13 C14 H14 120.3 . . ?
C15 C14 H14 120.3 . . ?
N4 C15 C14 121.2(7) . . ?
N4 C15 C16 119.1(7) . . ?
C14 C15 C16 119.7(6) . . ?
C15 C16 H16A 109.5 . . ?
C15 C16 H16B 109.5 . . ?
H16A C16 H16B 109.5 . . ?
C15 C16 H16C 109.5 . . ?
H16A C16 H16C 109.5 . . ?
H16B C16 H16C 109.5 . . ?
N6 C21 C22 121.8(6) . . ?
N6 C21 N5 118.6(5) . . ?
C22 C21 N5 119.5(6) . . ?
C23 C22 C21 119.5(7) . . ?
C23 C22 H22 120.2 . . ?
C21 C22 H22 120.2 . . ?
C24 C23 C22 119.0(7) . . ?
C24 C23 H23 120.5 . . ?
C22 C23 H23 120.5 . . ?
C23 C24 C25 120.7(7) . . ?
C23 C24 H24 119.6 . . ?
C25 C24 H24 119.6 . . ?
N6 C25 C24 120.6(7) . . ?
N6 C25 C26 119.0(6) . . ?
C24 C25 C26 120.4(7) . . ?
C25 C26 H26A 109.5 . . ?
C25 C26 H26B 109.5 . . ?
H26A C26 H26B 109.5 . . ?
C25 C26 H26C 109.5 . . ?
H26A C26 H26C 109.5 . . ?
H26B C26 H26C 109.5 . . ?
O101 C101 Ru1 169.2(6) . . ?
O102 C102 Ru1 177.7(7) . . ?
O201 C201 Ru2 175.1(7) . . ?
O202 C202 Ru2 172.8(7) . . ?
O301 C301 Ru3 177.2(7) . . ?
O302 C302 Ru3 175.6(9) . . ?
O303 C303 Ru3 177.8(7) . . ?
O401 C401 Ru4 176.4(6) . . ?
O402 C402 Ru4 171.5(6) . . ?
O403 C403 Ru4 138.3(5) . . ?
O403 C403 Ru5 129.7(5) . . ?
Ru4 C403 Ru5 91.9(2) . . ?
O501 C501 Ru5 177.0(8) . . ?
O502 C502 Ru5 174.6(7) . . ?
O601 C601 Ru6 177.3(6) . . ?
O602 C602 Ru6 177.9(6) . . ?
O701 C701 Ru7 177.0(6) . . ?
O702 C702 Ru7 177.5(6) . . ?
O801 C801 Ru8 155.2(6) . . ?
O801 C801 Ru7 121.4(5) . . ?
Ru8 C801 Ru7 83.4(2) . . ?
O802 C802 Ru8 171.7(6) . . ?
O901 C901 Ru9 173.2(9) . . ?
O902 C902 Ru9 178.1(7) . . ?
O903 C903 Ru9 178.9(6) . . ?
C1 N1 Ru8 135.6(4) . . ?
C1 N1 Ru2 121.5(4) . . ?
Ru8 N1 Ru2 97.62(18) . . ?
C1 N1 Ru1 113.8(4) . . ?
Ru8 N1 Ru1 86.53(17) . . ?
Ru2 N1 Ru1 86.53(16) . . ?
C1 N2 C5 118.5(6) . . ?
C1 N2 Ru3 113.0(4) . . ?
C5 N2 Ru3 128.0(5) . . ?
C11 N3 Ru7 121.2(4) . . ?
C11 N3 Ru6 115.9(4) . . ?
Ru7 N3 Ru6 82.34(17) . . ?
C11 N3 H30 108(4) . . ?
Ru7 N3 H30 120(4) . . ?
Ru6 N3 H30 105(4) . . ?
C11 N4 C15 118.2(6) . . ?
C11 N4 Ru9 113.6(4) . . ?
C15 N4 Ru9 128.0(5) . . ?
C21 N5 Ru4 125.3(4) . . ?
C21 N5 Ru8 111.2(4) . . ?
Ru4 N5 Ru8 89.94(18) . . ?
C21 N5 H50 114(4) . . ?
Ru4 N5 H50 107(3) . . ?
Ru8 N5 H50 105(3) . . ?
C21 N6 C25 117.6(6) . . ?
C21 N6 Ru5 119.4(4) . . ?
C25 N6 Ru5 121.3(4) . . ?
Ru7 O10 Ru6 83.45(12) . . ?
Ru7 O10 Ru8 86.06(12) . . ?
Ru6 O10 Ru8 137.62(17) . . ?
Ru7 O10 Ru4 127.95(17) . . ?
Ru6 O10 Ru4 130.84(16) . . ?
Ru8 O10 Ru4 86.90(12) . . ?
Ru1 O20 Ru5 93.01(14) . . ?
Ru1 O20 Ru8 84.06(12) . . ?
Ru5 O20 Ru8 121.44(17) . . ?
Ru1 O20 Ru4 167.63(19) . . ?
Ru5 O20 Ru4 84.42(12) . . ?
Ru8 O20 Ru4 86.96(13) . . ?
Ru1 O20 Ru2 83.36(12) . . ?
Ru5 O20 Ru2 148.06(18) . . ?
Ru8 O20 Ru2 89.86(12) . . ?
Ru4 O20 Ru2 105.16(15) . . ?
C102 Ru1 C101 85.0(3) . . ?
C102 Ru1 O20 162.9(3) . . ?
C101 Ru1 O20 106.5(2) . . ?
C102 Ru1 N1 96.9(3) . . ?
C101 Ru1 N1 171.4(3) . . ?
O20 Ru1 N1 73.65(15) . . ?
C102 Ru1 Ru3 86.9(2) . . ?
C101 Ru1 Ru3 98.1(2) . . ?
O20 Ru1 Ru3 103.55(10) . . ?
N1 Ru1 Ru3 73.64(13) . . ?
C102 Ru1 Ru8 114.2(2) . . ?
C101 Ru1 Ru8 140.7(2) . . ?
O20 Ru1 Ru8 49.04(9) . . ?
N1 Ru1 Ru8 45.70(12) . . ?
Ru3 Ru1 Ru8 116.09(2) . . ?
C102 Ru1 Ru2 131.8(2) . . ?
C101 Ru1 Ru2 127.4(2) . . ?
O20 Ru1 Ru2 50.12(10) . . ?
N1 Ru1 Ru2 46.01(13) . . ?
Ru3 Ru1 Ru2 57.348(17) . . ?
Ru8 Ru1 Ru2 65.497(15) . . ?
C102 Ru1 Ru5 139.0(2) . . ?
C101 Ru1 Ru5 66.2(2) . . ?
O20 Ru1 Ru5 43.66(9) . . ?
N1 Ru1 Ru5 116.07(12) . . ?
Ru3 Ru1 Ru5 124.16(2) . . ?
Ru8 Ru1 Ru5 78.269(16) . . ?
Ru2 Ru1 Ru5 89.207(17) . . ?
C201 Ru2 C202 87.6(3) . . ?
C201 Ru2 N1 97.9(3) . . ?
C202 Ru2 N1 168.8(3) . . ?
C201 Ru2 O20 169.4(3) . . ?
C202 Ru2 O20 102.9(2) . . ?
N1 Ru2 O20 72.15(15) . . ?
C201 Ru2 Ru3 79.9(2) . . ?
C202 Ru2 Ru3 96.9(2) . . ?
N1 Ru2 Ru3 74.60(13) . . ?
O20 Ru2 Ru3 100.54(10) . . ?
C201 Ru2 Ru1 128.9(2) . . ?
C202 Ru2 Ru1 121.8(2) . . ?
N1 Ru2 Ru1 47.47(13) . . ?
O20 Ru2 Ru1 46.52(9) . . ?
Ru3 Ru2 Ru1 57.696(17) . . ?
C201 Ru2 Ru6 68.9(2) . . ?
C202 Ru2 Ru6 91.7(2) . . ?
N1 Ru2 Ru6 99.34(13) . . ?
O20 Ru2 Ru6 108.34(10) . . ?
Ru3 Ru2 Ru6 147.12(2) . . ?
Ru1 Ru2 Ru6 139.30(2) . . ?
C201 Ru2 Ru8 125.2(2) . . ?
C202 Ru2 Ru8 140.6(2) . . ?
N1 Ru2 Ru8 40.94(12) . . ?
O20 Ru2 Ru8 44.43(9) . . ?
Ru3 Ru2 Ru8 108.87(2) . . ?
Ru1 Ru2 Ru8 57.032(14) . . ?
Ru6 Ru2 Ru8 82.568(15) . . ?
C303 Ru3 C302 89.2(4) . . ?
C303 Ru3 C301 92.0(3) . . ?
C302 Ru3 C301 95.3(4) . . ?
C303 Ru3 N2 169.7(3) . . ?
C302 Ru3 N2 98.8(3) . . ?
C301 Ru3 N2 93.9(3) . . ?
C303 Ru3 Ru2 89.6(2) . . ?
C302 Ru3 Ru2 100.7(3) . . ?
C301 Ru3 Ru2 163.9(3) . . ?
N2 Ru3 Ru2 82.45(13) . . ?
C303 Ru3 Ru1 86.0(2) . . ?
C302 Ru3 Ru1 164.9(3) . . ?
C301 Ru3 Ru1 99.2(2) . . ?
N2 Ru3 Ru1 84.60(14) . . ?
Ru2 Ru3 Ru1 64.956(17) . . ?
C401 Ru4 C402 86.0(3) . . ?
C401 Ru4 C403 90.7(3) . . ?
C402 Ru4 C403 86.7(3) . . ?
C401 Ru4 N5 94.9(2) . . ?
C402 Ru4 N5 177.1(2) . . ?
C403 Ru4 N5 90.6(2) . . ?
C401 Ru4 O20 173.1(2) . . ?
C402 Ru4 O20 100.7(2) . . ?
C403 Ru4 O20 91.2(2) . . ?
N5 Ru4 O20 78.40(16) . . ?
C401 Ru4 O10 107.3(2) . . ?
C402 Ru4 O10 102.8(2) . . ?
C403 Ru4 O10 160.0(2) . . ?
N5 Ru4 O10 79.54(15) . . ?
O20 Ru4 O10 69.93(13) . . ?
C401 Ru4 Ru5 134.50(19) . . ?
C402 Ru4 Ru5 98.6(2) . . ?
C403 Ru4 Ru5 44.99(19) . . ?
N5 Ru4 Ru5 78.79(14) . . ?
O20 Ru4 Ru5 46.43(9) . . ?
O10 Ru4 Ru5 115.48(9) . . ?
C401 Ru4 Ru8 127.45(18) . . ?
C402 Ru4 Ru8 135.9(2) . . ?
C403 Ru4 Ru8 116.50(18) . . ?
N5 Ru4 Ru8 45.06(12) . . ?
O20 Ru4 Ru8 46.05(9) . . ?
O10 Ru4 Ru8 45.25(9) . . ?
Ru5 Ru4 Ru8 78.351(15) . . ?
C501 Ru5 C502 86.0(3) . . ?
C501 Ru5 C403 90.7(3) . . ?
C502 Ru5 C403 89.0(3) . . ?
C501 Ru5 O20 177.0(3) . . ?
C502 Ru5 O20 92.8(2) . . ?
C403 Ru5 O20 92.04(19) . . ?
C501 Ru5 N6 90.8(3) . . ?
C502 Ru5 N6 175.6(2) . . ?
C403 Ru5 N6 88.1(2) . . ?
O20 Ru5 N6 90.53(16) . . ?
C501 Ru5 Ru4 133.7(2) . . ?
C502 Ru5 Ru4 94.7(2) . . ?
C403 Ru5 Ru4 43.10(16) . . ?
O20 Ru5 Ru4 49.15(10) . . ?
N6 Ru5 Ru4 85.37(13) . . ?
C501 Ru5 Ru1 134.1(2) . . ?
C502 Ru5 Ru1 97.8(2) . . ?
C403 Ru5 Ru1 134.90(16) . . ?
O20 Ru5 Ru1 43.33(10) . . ?
N6 Ru5 Ru1 86.58(13) . . ?
Ru4 Ru5 Ru1 91.815(16) . . ?
C602 Ru6 C601 88.7(3) . . ?
C602 Ru6 O10 170.8(2) . . ?
C601 Ru6 O10 97.7(2) . . ?
C602 Ru6 N3 96.1(2) . . ?
C601 Ru6 N3 171.2(2) . . ?
O10 Ru6 N3 78.47(16) . . ?
C602 Ru6 Ru9 84.7(2) . . ?
C601 Ru6 Ru9 99.2(2) . . ?
O10 Ru6 Ru9 100.71(10) . . ?
N3 Ru6 Ru9 74.01(15) . . ?
C602 Ru6 Ru7 132.6(2) . . ?
C601 Ru6 Ru7 122.96(19) . . ?
O10 Ru6 Ru7 48.10(9) . . ?
N3 Ru6 Ru7 48.78(14) . . ?
Ru9 Ru6 Ru7 58.221(16) . . ?
C602 Ru6 Ru2 114.6(2) . . ?
C601 Ru6 Ru2 96.0(2) . . ?
O10 Ru6 Ru2 58.27(10) . . ?
N3 Ru6 Ru2 88.69(14) . . ?
Ru9 Ru6 Ru2 155.66(2) . . ?
Ru7 Ru6 Ru2 97.506(17) . . ?
C701 Ru7 C702 86.1(3) . . ?
C701 Ru7 O10 172.7(2) . . ?
C702 Ru7 O10 98.9(2) . . ?
C701 Ru7 N3 97.2(3) . . ?
C702 Ru7 N3 169.4(2) . . ?
O10 Ru7 N3 78.79(16) . . ?
C701 Ru7 C801 85.6(3) . . ?
C702 Ru7 C801 99.0(2) . . ?
O10 Ru7 C801 88.37(18) . . ?
N3 Ru7 C801 91.3(2) . . ?
C701 Ru7 Ru9 83.1(2) . . ?
C702 Ru7 Ru9 96.09(18) . . ?
O10 Ru7 Ru9 101.52(9) . . ?
N3 Ru7 Ru9 74.39(14) . . ?
C801 Ru7 Ru9 160.43(15) . . ?
C701 Ru7 Ru6 132.6(2) . . ?
C702 Ru7 Ru6 122.19(18) . . ?
O10 Ru7 Ru6 48.45(9) . . ?
N3 Ru7 Ru6 48.87(13) . . ?
C801 Ru7 Ru6 121.03(15) . . ?
Ru9 Ru7 Ru6 58.756(16) . . ?
C701 Ru7 Ru8 126.5(2) . . ?
C702 Ru7 Ru8 100.13(18) . . ?
O10 Ru7 Ru8 47.57(9) . . ?
N3 Ru7 Ru8 86.06(14) . . ?
C801 Ru7 Ru8 40.91(15) . . ?
Ru9 Ru7 Ru8 146.85(2) . . ?
Ru6 Ru7 Ru8 88.197(16) . . ?
C802 Ru8 C801 80.5(3) . . ?
C802 Ru8 N1 94.0(3) . . ?
C801 Ru8 N1 106.7(2) . . ?
C802 Ru8 N5 94.9(2) . . ?
C801 Ru8 N5 100.3(2) . . ?
N1 Ru8 N5 152.60(18) . . ?
C802 Ru8 O10 176.1(2) . . ?
C801 Ru8 O10 101.9(2) . . ?
N1 Ru8 O10 88.20(16) . . ?
N5 Ru8 O10 81.65(16) . . ?
C802 Ru8 O20 105.2(2) . . ?
C801 Ru8 O20 174.3(2) . . ?
N1 Ru8 O20 73.57(15) . . ?
N5 Ru8 O20 79.10(16) . . ?
O10 Ru8 O20 72.34(13) . . ?
C802 Ru8 Ru1 70.3(2) . . ?
C801 Ru8 Ru1 137.4(2) . . ?
N1 Ru8 Ru1 47.78(13) . . ?
N5 Ru8 Ru1 112.25(14) . . ?
O10 Ru8 Ru1 109.14(10) . . ?
O20 Ru8 Ru1 46.90(10) . . ?
C802 Ru8 Ru7 135.7(2) . . ?
C801 Ru8 Ru7 55.7(2) . . ?
N1 Ru8 Ru7 103.69(13) . . ?
N5 Ru8 Ru7 87.55(14) . . ?
O10 Ru8 Ru7 46.38(9) . . ?
O20 Ru8 Ru7 118.59(10) . . ?
Ru1 Ru8 Ru7 147.590(19) . . ?
C802 Ru8 Ru4 128.2(2) . . ?
C801 Ru8 Ru4 129.1(2) . . ?
N1 Ru8 Ru4 110.93(13) . . ?
N5 Ru8 Ru4 44.99(12) . . ?
O10 Ru8 Ru4 47.86(9) . . ?
O20 Ru8 Ru4 46.99(10) . . ?
Ru1 Ru8 Ru4 93.548(16) . . ?
Ru7 Ru8 Ru4 82.557(16) . . ?
C802 Ru8 Ru2 126.3(2) . . ?
C801 Ru8 Ru2 130.99(19) . . ?
N1 Ru8 Ru2 41.45(13) . . ?
N5 Ru8 Ru2 114.74(13) . . ?
O10 Ru8 Ru2 54.27(10) . . ?
O20 Ru8 Ru2 45.71(9) . . ?
Ru1 Ru8 Ru2 57.471(14) . . ?
Ru7 Ru8 Ru2 91.381(16) . . ?
Ru4 Ru8 Ru2 70.173(14) . . ?
C903 Ru9 C902 92.4(3) . . ?
C903 Ru9 C901 93.6(3) . . ?
C902 Ru9 C901 94.8(4) . . ?
C903 Ru9 N4 165.6(2) . . ?
C902 Ru9 N4 94.3(2) . . ?
C901 Ru9 N4 98.6(3) . . ?
C903 Ru9 Ru7 84.67(19) . . ?
C902 Ru9 Ru7 163.6(2) . . ?
C901 Ru9 Ru7 101.4(3) . . ?
N4 Ru9 Ru7 85.30(13) . . ?
C903 Ru9 Ru6 81.7(2) . . ?
C902 Ru9 Ru6 100.6(2) . . ?
C901 Ru9 Ru6 164.0(3) . . ?
N4 Ru9 Ru6 84.48(14) . . ?
Ru7 Ru9 Ru6 63.023(16) . . ?
 
loop_
 _geom_torsion_atom_site_label_1
 _geom_torsion_atom_site_label_2
 _geom_torsion_atom_site_label_3
 _geom_torsion_atom_site_label_4
 _geom_torsion
 _geom_torsion_site_symmetry_1
 _geom_torsion_site_symmetry_2
 _geom_torsion_site_symmetry_3
 _geom_torsion_site_symmetry_4
 _geom_torsion_publ_flag
N2 C1 C2 C3 -3.4(10) . . . . ?
N1 C1 C2 C3 175.6(6) . . . . ?
C1 C2 C3 C4 0.0(12) . . . . ?
C2 C3 C4 C5 2.0(13) . . . . ?
C3 C4 C5 N2 -0.6(12) . . . . ?
C3 C4 C5 C6 -178.9(8) . . . . ?
N4 C11 C12 C13 -1.3(11) . . . . ?
N3 C11 C12 C13 -178.6(7) . . . . ?
C11 C12 C13 C14 -0.9(13) . . . . ?
C12 C13 C14 C15 1.4(13) . . . . ?
C13 C14 C15 N4 0.2(12) . . . . ?
C13 C14 C15 C16 -178.7(8) . . . . ?
N6 C21 C22 C23 -4.5(11) . . . . ?
N5 C21 C22 C23 171.2(7) . . . . ?
C21 C22 C23 C24 -2.4(13) . . . . ?
C22 C23 C24 C25 3.5(14) . . . . ?
C23 C24 C25 N6 2.1(13) . . . . ?
C23 C24 C25 C26 -175.2(9) . . . . ?
N2 C1 N1 Ru8 -173.1(4) . . . . ?
C2 C1 N1 Ru8 7.8(10) . . . . ?
N2 C1 N1 Ru2 38.9(7) . . . . ?
C2 C1 N1 Ru2 -140.2(6) . . . . ?
N2 C1 N1 Ru1 -62.2(6) . . . . ?
C2 C1 N1 Ru1 118.7(6) . . . . ?
C2 C1 N2 C5 4.7(10) . . . . ?
N1 C1 N2 C5 -174.4(6) . . . . ?
C2 C1 N2 Ru3 -167.8(5) . . . . ?
N1 C1 N2 Ru3 13.1(7) . . . . ?
C4 C5 N2 C1 -2.7(10) . . . . ?
C6 C5 N2 C1 175.6(7) . . . . ?
C4 C5 N2 Ru3 168.5(6) . . . . ?
C6 C5 N2 Ru3 -13.2(10) . . . . ?
N4 C11 N3 Ru7 42.2(7) . . . . ?
C12 C11 N3 Ru7 -140.3(6) . . . . ?
N4 C11 N3 Ru6 -54.7(6) . . . . ?
C12 C11 N3 Ru6 122.7(6) . . . . ?
C12 C11 N4 C15 2.8(9) . . . . ?
N3 C11 N4 C15 -179.7(5) . . . . ?
C12 C11 N4 Ru9 -171.7(5) . . . . ?
N3 C11 N4 Ru9 5.7(7) . . . . ?
C14 C15 N4 C11 -2.3(10) . . . . ?
C16 C15 N4 C11 176.6(6) . . . . ?
C14 C15 N4 Ru9 171.4(5) . . . . ?
C16 C15 N4 Ru9 -9.7(9) . . . . ?
N6 C21 N5 Ru4 -46.7(7) . . . . ?
C22 C21 N5 Ru4 137.5(5) . . . . ?
N6 C21 N5 Ru8 59.2(6) . . . . ?
C22 C21 N5 Ru8 -116.6(5) . . . . ?
C22 C21 N6 C25 9.9(9) . . . . ?
N5 C21 N6 C25 -165.8(5) . . . . ?
C22 C21 N6 Ru5 -155.4(5) . . . . ?
N5 C21 N6 Ru5 28.9(7) . . . . ?
C24 C25 N6 C21 -8.7(10) . . . . ?
C26 C25 N6 C21 168.7(6) . . . . ?
C24 C25 N6 Ru5 156.3(6) . . . . ?
C26 C25 N6 Ru5 -26.3(9) . . . . ?
Ru5 O20 Ru1 C102 108.1(8) . . . . ?
Ru8 O20 Ru1 C102 -13.2(9) . . . . ?
Ru4 O20 Ru1 C102 30.5(14) . . . . ?
Ru2 O20 Ru1 C102 -103.8(8) . . . . ?
Ru5 O20 Ru1 C101 -22.9(3) . . . . ?
Ru8 O20 Ru1 C101 -144.2(2) . . . . ?
Ru4 O20 Ru1 C101 -100.5(9) . . . . ?
Ru2 O20 Ru1 C101 125.3(2) . . . . ?
Ru5 O20 Ru1 N1 166.14(18) . . . . ?
Ru8 O20 Ru1 N1 44.83(15) . . . . ?
Ru4 O20 Ru1 N1 88.5(8) . . . . ?
Ru2 O20 Ru1 N1 -45.72(15) . . . . ?
Ru5 O20 Ru1 Ru3 -125.74(9) . . . . ?
Ru8 O20 Ru1 Ru3 112.95(8) . . . . ?
Ru4 O20 Ru1 Ru3 156.7(8) . . . . ?
Ru2 O20 Ru1 Ru3 22.40(10) . . . . ?
Ru5 O20 Ru1 Ru8 121.31(16) . . . . ?
Ru4 O20 Ru1 Ru8 43.7(8) . . . . ?
Ru2 O20 Ru1 Ru8 -90.55(11) . . . . ?
Ru5 O20 Ru1 Ru2 -148.14(17) . . . . ?
Ru8 O20 Ru1 Ru2 90.55(11) . . . . ?
Ru4 O20 Ru1 Ru2 134.3(9) . . . . ?
Ru8 O20 Ru1 Ru5 -121.31(16) . . . . ?
Ru4 O20 Ru1 Ru5 -77.6(8) . . . . ?
Ru2 O20 Ru1 Ru5 148.14(17) . . . . ?
C1 N1 Ru1 C102 -21.7(5) . . . . ?
Ru8 N1 Ru1 C102 117.4(3) . . . . ?
Ru2 N1 Ru1 C102 -144.8(3) . . . . ?
C1 N1 Ru1 O20 172.8(4) . . . . ?
Ru8 N1 Ru1 O20 -48.07(14) . . . . ?
Ru2 N1 Ru1 O20 49.79(14) . . . . ?
C1 N1 Ru1 Ru3 62.9(4) . . . . ?
Ru8 N1 Ru1 Ru3 -157.98(15) . . . . ?
Ru2 N1 Ru1 Ru3 -60.12(11) . . . . ?
C1 N1 Ru1 Ru8 -139.1(5) . . . . ?
Ru2 N1 Ru1 Ru8 97.86(17) . . . . ?
C1 N1 Ru1 Ru2 123.0(5) . . . . ?
Ru8 N1 Ru1 Ru2 -97.86(17) . . . . ?
C1 N1 Ru1 Ru5 -176.5(4) . . . . ?
Ru8 N1 Ru1 Ru5 -37.45(18) . . . . ?
Ru2 N1 Ru1 Ru5 60.41(16) . . . . ?
C1 N1 Ru2 C201 21.3(5) . . . . ?
Ru8 N1 Ru2 C201 -136.8(3) . . . . ?
Ru1 N1 Ru2 C201 137.2(2) . . . . ?
C1 N1 Ru2 C202 -97.5(13) . . . . ?
Ru8 N1 Ru2 C202 104.4(12) . . . . ?
Ru1 N1 Ru2 C202 18.3(13) . . . . ?
C1 N1 Ru2 O20 -162.6(5) . . . . ?
Ru8 N1 Ru2 O20 39.31(15) . . . . ?
Ru1 N1 Ru2 O20 -46.71(13) . . . . ?
C1 N1 Ru2 Ru3 -55.9(4) . . . . ?
Ru8 N1 Ru2 Ru3 146.05(18) . . . . ?
Ru1 N1 Ru2 Ru3 60.03(10) . . . . ?
C1 N1 Ru2 Ru1 -115.9(5) . . . . ?
Ru8 N1 Ru2 Ru1 86.03(18) . . . . ?
C1 N1 Ru2 Ru6 91.0(4) . . . . ?
Ru8 N1 Ru2 Ru6 -67.07(16) . . . . ?
Ru1 N1 Ru2 Ru6 -153.09(10) . . . . ?
C1 N1 Ru2 Ru8 158.1(5) . . . . ?
Ru1 N1 Ru2 Ru8 -86.03(18) . . . . ?
Ru1 O20 Ru2 C201 68.9(13) . . . . ?
Ru5 O20 Ru2 C201 153.9(12) . . . . ?
Ru8 O20 Ru2 C201 -15.1(13) . . . . ?
Ru4 O20 Ru2 C201 -101.9(13) . . . . ?
Ru1 O20 Ru2 C202 -121.9(2) . . . . ?
Ru5 O20 Ru2 C202 -36.9(4) . . . . ?
Ru8 O20 Ru2 C202 154.0(2) . . . . ?
Ru4 O20 Ru2 C202 67.2(3) . . . . ?
Ru1 O20 Ru2 N1 47.67(15) . . . . ?
Ru5 O20 Ru2 N1 132.7(4) . . . . ?
Ru8 O20 Ru2 N1 -36.37(15) . . . . ?
Ru4 O20 Ru2 N1 -123.18(19) . . . . ?
Ru1 O20 Ru2 Ru3 -22.23(10) . . . . ?
Ru5 O20 Ru2 Ru3 62.8(3) . . . . ?
Ru8 O20 Ru2 Ru3 -106.27(9) . . . . ?
Ru4 O20 Ru2 Ru3 166.92(10) . . . . ?
Ru5 O20 Ru2 Ru1 85.0(3) . . . . ?
Ru8 O20 Ru2 Ru1 -84.04(12) . . . . ?
Ru4 O20 Ru2 Ru1 -170.9(2) . . . . ?
Ru1 O20 Ru2 Ru6 141.85(7) . . . . ?
Ru5 O20 Ru2 Ru6 -133.1(3) . . . . ?
Ru8 O20 Ru2 Ru6 57.81(12) . . . . ?
Ru4 O20 Ru2 Ru6 -29.01(14) . . . . ?
Ru1 O20 Ru2 Ru8 84.04(12) . . . . ?
Ru5 O20 Ru2 Ru8 169.1(4) . . . . ?
Ru4 O20 Ru2 Ru8 -86.81(15) . . . . ?
C102 Ru1 Ru2 C201 -9.8(4) . . . . ?
C101 Ru1 Ru2 C201 112.7(4) . . . . ?
O20 Ru1 Ru2 C201 -167.2(3) . . . . ?
N1 Ru1 Ru2 C201 -59.9(3) . . . . ?
Ru3 Ru1 Ru2 C201 38.9(3) . . . . ?
Ru8 Ru1 Ru2 C201 -111.1(3) . . . . ?
Ru5 Ru1 Ru2 C201 171.4(3) . . . . ?
C102 Ru1 Ru2 C202 -125.7(4) . . . . ?
C101 Ru1 Ru2 C202 -3.2(4) . . . . ?
O20 Ru1 Ru2 C202 76.9(3) . . . . ?
N1 Ru1 Ru2 C202 -175.9(3) . . . . ?
Ru3 Ru1 Ru2 C202 -77.0(2) . . . . ?
Ru8 Ru1 Ru2 C202 132.9(2) . . . . ?
Ru5 Ru1 Ru2 C202 55.5(2) . . . . ?
C102 Ru1 Ru2 N1 50.2(4) . . . . ?
C101 Ru1 Ru2 N1 172.6(3) . . . . ?
O20 Ru1 Ru2 N1 -107.3(2) . . . . ?
Ru3 Ru1 Ru2 N1 98.84(17) . . . . ?
Ru8 Ru1 Ru2 N1 -51.18(17) . . . . ?
Ru5 Ru1 Ru2 N1 -128.64(17) . . . . ?
C102 Ru1 Ru2 O20 157.4(3) . . . . ?
C101 Ru1 Ru2 O20 -80.1(3) . . . . ?
N1 Ru1 Ru2 O20 107.3(2) . . . . ?
Ru3 Ru1 Ru2 O20 -153.89(12) . . . . ?
Ru8 Ru1 Ru2 O20 56.09(12) . . . . ?
Ru5 Ru1 Ru2 O20 -21.37(12) . . . . ?
C102 Ru1 Ru2 Ru3 -48.7(3) . . . . ?
C101 Ru1 Ru2 Ru3 73.8(3) . . . . ?
O20 Ru1 Ru2 Ru3 153.89(12) . . . . ?
N1 Ru1 Ru2 Ru3 -98.84(17) . . . . ?
Ru8 Ru1 Ru2 Ru3 -150.02(2) . . . . ?
Ru5 Ru1 Ru2 Ru3 132.52(2) . . . . ?
C102 Ru1 Ru2 Ru6 93.4(3) . . . . ?
C101 Ru1 Ru2 Ru6 -144.1(3) . . . . ?
O20 Ru1 Ru2 Ru6 -64.05(13) . . . . ?
N1 Ru1 Ru2 Ru6 43.21(17) . . . . ?
Ru3 Ru1 Ru2 Ru6 142.05(3) . . . . ?
Ru8 Ru1 Ru2 Ru6 -7.97(3) . . . . ?
Ru5 Ru1 Ru2 Ru6 -85.42(3) . . . . ?
C102 Ru1 Ru2 Ru8 101.4(3) . . . . ?
C101 Ru1 Ru2 Ru8 -136.2(3) . . . . ?
O20 Ru1 Ru2 Ru8 -56.09(12) . . . . ?
N1 Ru1 Ru2 Ru8 51.18(17) . . . . ?
Ru3 Ru1 Ru2 Ru8 150.02(2) . . . . ?
Ru5 Ru1 Ru2 Ru8 -77.458(16) . . . . ?
C1 N2 Ru3 C303 -0.2(18) . . . . ?
C5 N2 Ru3 C303 -171.9(15) . . . . ?
C1 N2 Ru3 C302 -140.1(5) . . . . ?
C5 N2 Ru3 C302 48.2(6) . . . . ?
C1 N2 Ru3 C301 123.9(5) . . . . ?
C5 N2 Ru3 C301 -47.7(6) . . . . ?
C1 N2 Ru3 Ru2 -40.4(4) . . . . ?
C5 N2 Ru3 Ru2 148.0(6) . . . . ?
C1 N2 Ru3 Ru1 25.0(4) . . . . ?
C5 N2 Ru3 Ru1 -146.6(6) . . . . ?
C201 Ru2 Ru3 C303 123.9(3) . . . . ?
C202 Ru2 Ru3 C303 37.7(3) . . . . ?
N1 Ru2 Ru3 C303 -134.9(3) . . . . ?
O20 Ru2 Ru3 C303 -66.9(3) . . . . ?
Ru1 Ru2 Ru3 C303 -85.8(3) . . . . ?
Ru6 Ru2 Ru3 C303 141.8(3) . . . . ?
Ru8 Ru2 Ru3 C303 -112.1(3) . . . . ?
C201 Ru2 Ru3 C302 34.8(4) . . . . ?
C202 Ru2 Ru3 C302 -51.4(4) . . . . ?
N1 Ru2 Ru3 C302 136.0(3) . . . . ?
O20 Ru2 Ru3 C302 -156.0(3) . . . . ?
Ru1 Ru2 Ru3 C302 -174.9(3) . . . . ?
Ru6 Ru2 Ru3 C302 52.7(3) . . . . ?
Ru8 Ru2 Ru3 C302 158.8(3) . . . . ?
C201 Ru2 Ru3 C301 -140.3(8) . . . . ?
C202 Ru2 Ru3 C301 133.4(8) . . . . ?
N1 Ru2 Ru3 C301 -39.1(8) . . . . ?
O20 Ru2 Ru3 C301 28.9(8) . . . . ?
Ru1 Ru2 Ru3 C301 9.9(8) . . . . ?
Ru6 Ru2 Ru3 C301 -122.4(8) . . . . ?
Ru8 Ru2 Ru3 C301 -16.4(8) . . . . ?
C201 Ru2 Ru3 N2 -62.7(3) . . . . ?
C202 Ru2 Ru3 N2 -149.0(3) . . . . ?
N1 Ru2 Ru3 N2 38.49(19) . . . . ?
O20 Ru2 Ru3 N2 106.49(17) . . . . ?
Ru1 Ru2 Ru3 N2 87.54(14) . . . . ?
Ru6 Ru2 Ru3 N2 -44.84(15) . . . . ?
Ru8 Ru2 Ru3 N2 61.24(14) . . . . ?
C201 Ru2 Ru3 Ru1 -150.2(2) . . . . ?
C202 Ru2 Ru3 Ru1 123.5(2) . . . . ?
N1 Ru2 Ru3 Ru1 -49.05(13) . . . . ?
O20 Ru2 Ru3 Ru1 18.95(9) . . . . ?
Ru6 Ru2 Ru3 Ru1 -132.38(4) . . . . ?
Ru8 Ru2 Ru3 Ru1 -26.298(18) . . . . ?
C102 Ru1 Ru3 C303 -122.7(3) . . . . ?
C101 Ru1 Ru3 C303 -38.2(3) . . . . ?
O20 Ru1 Ru3 C303 71.1(3) . . . . ?
N1 Ru1 Ru3 C303 139.2(3) . . . . ?
Ru8 Ru1 Ru3 C303 121.8(2) . . . . ?
Ru2 Ru1 Ru3 C303 91.4(2) . . . . ?
Ru5 Ru1 Ru3 C303 28.5(2) . . . . ?
C102 Ru1 Ru3 C302 165.4(11) . . . . ?
C101 Ru1 Ru3 C302 -110.1(11) . . . . ?
O20 Ru1 Ru3 C302 -0.8(10) . . . . ?
N1 Ru1 Ru3 C302 67.3(10) . . . . ?
Ru8 Ru1 Ru3 C302 49.9(10) . . . . ?
Ru2 Ru1 Ru3 C302 19.5(10) . . . . ?
Ru5 Ru1 Ru3 C302 -43.5(10) . . . . ?
C102 Ru1 Ru3 C301 -31.3(3) . . . . ?
C101 Ru1 Ru3 C301 53.2(3) . . . . ?
O20 Ru1 Ru3 C301 162.4(2) . . . . ?
N1 Ru1 Ru3 C301 -129.4(3) . . . . ?
Ru8 Ru1 Ru3 C301 -146.8(2) . . . . ?
Ru2 Ru1 Ru3 C301 -177.2(2) . . . . ?
Ru5 Ru1 Ru3 C301 119.8(2) . . . . ?
C102 Ru1 Ru3 N2 61.7(3) . . . . ?
C101 Ru1 Ru3 N2 146.2(3) . . . . ?
O20 Ru1 Ru3 N2 -104.51(17) . . . . ?
N1 Ru1 Ru3 N2 -36.38(19) . . . . ?
Ru8 Ru1 Ru3 N2 -53.76(14) . . . . ?
Ru2 Ru1 Ru3 N2 -84.18(14) . . . . ?
Ru5 Ru1 Ru3 N2 -147.13(14) . . . . ?
C102 Ru1 Ru3 Ru2 145.9(2) . . . . ?
C101 Ru1 Ru3 Ru2 -129.6(2) . . . . ?
O20 Ru1 Ru3 Ru2 -20.33(10) . . . . ?
N1 Ru1 Ru3 Ru2 47.80(13) . . . . ?
Ru8 Ru1 Ru3 Ru2 30.42(2) . . . . ?
Ru5 Ru1 Ru3 Ru2 -62.95(2) . . . . ?
Ru5 C403 Ru4 C401 168.4(3) . . . . ?
O403 C403 Ru4 C402 77.3(9) . . . . ?
Ru5 C403 Ru4 C402 -105.6(3) . . . . ?
O403 C403 Ru4 N5 -103.6(8) . . . . ?
Ru5 C403 Ru4 N5 73.5(2) . . . . ?
O403 C403 Ru4 O20 177.9(8) . . . . ?
Ru5 C403 Ru4 O20 -5.0(2) . . . . ?
O403 C403 Ru4 O10 -163.3(6) . . . . ?
Ru5 C403 Ru4 O10 13.8(7) . . . . ?
O403 C403 Ru4 Ru5 -177.1(10) . . . . ?
O403 C403 Ru4 Ru8 -142.0(8) . . . . ?
Ru5 C403 Ru4 Ru8 35.1(3) . . . . ?
C21 N5 Ru4 C401 -102.8(5) . . . . ?
Ru8 N5 Ru4 C401 140.9(2) . . . . ?
C21 N5 Ru4 C403 -12.1(5) . . . . ?
Ru8 N5 Ru4 C403 -128.4(2) . . . . ?
C21 N5 Ru4 O20 79.0(5) . . . . ?
Ru8 N5 Ru4 O20 -37.25(15) . . . . ?
C21 N5 Ru4 O10 150.5(5) . . . . ?
Ru8 N5 Ru4 O10 34.19(15) . . . . ?
C21 N5 Ru4 Ru5 31.6(4) . . . . ?
Ru8 N5 Ru4 Ru5 -84.67(14) . . . . ?
C21 N5 Ru4 Ru8 116.3(5) . . . . ?
Ru1 O20 Ru4 C402 170.2(8) . . . . ?
Ru5 O20 Ru4 C402 91.7(2) . . . . ?
Ru8 O20 Ru4 C402 -146.3(2) . . . . ?
Ru2 O20 Ru4 C402 -57.3(2) . . . . ?
Ru1 O20 Ru4 C403 83.3(9) . . . . ?
Ru5 O20 Ru4 C403 4.8(2) . . . . ?
Ru8 O20 Ru4 C403 126.8(2) . . . . ?
Ru2 O20 Ru4 C403 -144.1(2) . . . . ?
Ru1 O20 Ru4 N5 -7.0(8) . . . . ?
Ru5 O20 Ru4 N5 -85.48(16) . . . . ?
Ru8 O20 Ru4 N5 36.52(15) . . . . ?
Ru2 O20 Ru4 N5 125.55(18) . . . . ?
Ru1 O20 Ru4 O10 -89.9(8) . . . . ?
Ru5 O20 Ru4 O10 -168.46(15) . . . . ?
Ru8 O20 Ru4 O10 -46.45(12) . . . . ?
Ru2 O20 Ru4 O10 42.58(13) . . . . ?
Ru1 O20 Ru4 Ru5 78.5(8) . . . . ?
Ru8 O20 Ru4 Ru5 122.00(16) . . . . ?
Ru2 O20 Ru4 Ru5 -148.97(19) . . . . ?
Ru1 O20 Ru4 Ru8 -43.5(8) . . . . ?
Ru5 O20 Ru4 Ru8 -122.00(15) . . . . ?
Ru2 O20 Ru4 Ru8 89.03(14) . . . . ?
Ru7 O10 Ru4 C401 -43.5(3) . . . . ?
Ru6 O10 Ru4 C401 75.4(3) . . . . ?
Ru8 O10 Ru4 C401 -126.0(2) . . . . ?
Ru7 O10 Ru4 C402 -133.3(3) . . . . ?
Ru6 O10 Ru4 C402 -14.4(3) . . . . ?
Ru8 O10 Ru4 C402 144.2(2) . . . . ?
Ru7 O10 Ru4 C403 109.8(6) . . . . ?
Ru6 O10 Ru4 C403 -131.3(6) . . . . ?
Ru8 O10 Ru4 C403 27.3(6) . . . . ?
Ru7 O10 Ru4 N5 48.5(2) . . . . ?
Ru6 O10 Ru4 N5 167.3(3) . . . . ?
Ru8 O10 Ru4 N5 -34.07(16) . . . . ?
Ru7 O10 Ru4 O20 129.8(2) . . . . ?
Ru6 O10 Ru4 O20 -111.3(2) . . . . ?
Ru8 O10 Ru4 O20 47.29(12) . . . . ?
Ru7 O10 Ru4 Ru5 120.60(18) . . . . ?
Ru6 O10 Ru4 Ru5 -120.54(19) . . . . ?
Ru8 O10 Ru4 Ru5 38.05(13) . . . . ?
Ru7 O10 Ru4 Ru8 82.55(19) . . . . ?
Ru6 O10 Ru4 Ru8 -158.6(3) . . . . ?
Ru4 C403 Ru5 Ru1 -2.1(4) . . . . ?
Ru1 O20 Ru5 C502 98.4(2) . . . . ?
Ru8 O20 Ru5 C502 -176.8(3) . . . . ?
Ru4 O20 Ru5 C502 -93.8(2) . . . . ?
Ru2 O20 Ru5 C502 16.1(4) . . . . ?
Ru1 O20 Ru5 C403 -172.5(2) . . . . ?
Ru8 O20 Ru5 C403 -87.7(2) . . . . ?
Ru4 O20 Ru5 C403 -4.7(2) . . . . ?
Ru2 O20 Ru5 C403 105.2(4) . . . . ?
Ru1 O20 Ru5 N6 -84.45(17) . . . . ?
Ru8 O20 Ru5 N6 0.4(2) . . . . ?
Ru4 O20 Ru5 N6 83.41(16) . . . . ?
Ru2 O20 Ru5 N6 -166.7(4) . . . . ?
Ru1 O20 Ru5 Ru4 -167.86(18) . . . . ?
Ru8 O20 Ru5 Ru4 -82.98(18) . . . . ?
Ru2 O20 Ru5 Ru4 109.9(4) . . . . ?
Ru8 O20 Ru5 Ru1 84.88(19) . . . . ?
Ru4 O20 Ru5 Ru1 167.86(18) . . . . ?
Ru2 O20 Ru5 Ru1 -82.3(3) . . . . ?
C21 N6 Ru5 C501 128.2(5) . . . . ?
C25 N6 Ru5 C501 -36.6(5) . . . . ?
C21 N6 Ru5 C403 37.5(4) . . . . ?
C25 N6 Ru5 C403 -127.2(5) . . . . ?
C21 N6 Ru5 O20 -54.5(4) . . . . ?
C25 N6 Ru5 O20 140.7(5) . . . . ?
C21 N6 Ru5 Ru4 -5.6(4) . . . . ?
C25 N6 Ru5 Ru4 -170.3(5) . . . . ?
C21 N6 Ru5 Ru1 -97.7(4) . . . . ?
C25 N6 Ru5 Ru1 97.6(5) . . . . ?
C401 Ru4 Ru5 C501 -10.9(4) . . . . ?
C402 Ru4 Ru5 C501 82.0(4) . . . . ?
C403 Ru4 Ru5 C501 5.5(4) . . . . ?
N5 Ru4 Ru5 C501 -96.8(4) . . . . ?
O20 Ru4 Ru5 C501 178.7(4) . . . . ?
O10 Ru4 Ru5 C501 -169.3(3) . . . . ?
Ru8 Ru4 Ru5 C501 -142.8(3) . . . . ?
C401 Ru4 Ru5 C502 -99.8(3) . . . . ?
C402 Ru4 Ru5 C502 -7.0(3) . . . . ?
C403 Ru4 Ru5 C502 -83.5(3) . . . . ?
N5 Ru4 Ru5 C502 174.3(2) . . . . ?
O20 Ru4 Ru5 C502 89.7(2) . . . . ?
O10 Ru4 Ru5 C502 101.7(2) . . . . ?
Ru8 Ru4 Ru5 C502 128.2(2) . . . . ?
C401 Ru4 Ru5 C403 -16.4(4) . . . . ?
C402 Ru4 Ru5 C403 76.5(3) . . . . ?
N5 Ru4 Ru5 C403 -102.3(3) . . . . ?
O20 Ru4 Ru5 C403 173.2(3) . . . . ?
O10 Ru4 Ru5 C403 -174.8(3) . . . . ?
Ru8 Ru4 Ru5 C403 -148.3(3) . . . . ?
C401 Ru4 Ru5 O20 170.5(3) . . . . ?
C402 Ru4 Ru5 O20 -96.7(2) . . . . ?
C403 Ru4 Ru5 O20 -173.2(3) . . . . ?
N5 Ru4 Ru5 O20 84.59(18) . . . . ?
O10 Ru4 Ru5 O20 12.02(16) . . . . ?
Ru8 Ru4 Ru5 O20 38.56(13) . . . . ?
C401 Ru4 Ru5 N6 75.7(3) . . . . ?
C402 Ru4 Ru5 N6 168.6(2) . . . . ?
C403 Ru4 Ru5 N6 92.1(3) . . . . ?
N5 Ru4 Ru5 N6 -10.13(18) . . . . ?
O20 Ru4 Ru5 N6 -94.72(18) . . . . ?
O10 Ru4 Ru5 N6 -82.70(16) . . . . ?
Ru8 Ru4 Ru5 N6 -56.16(13) . . . . ?
C401 Ru4 Ru5 Ru1 162.2(3) . . . . ?
C402 Ru4 Ru5 Ru1 -105.0(2) . . . . ?
C403 Ru4 Ru5 Ru1 178.5(3) . . . . ?
N5 Ru4 Ru5 Ru1 76.29(12) . . . . ?
O20 Ru4 Ru5 Ru1 -8.30(13) . . . . ?
O10 Ru4 Ru5 Ru1 3.72(10) . . . . ?
Ru8 Ru4 Ru5 Ru1 30.262(15) . . . . ?
C102 Ru1 Ru5 C501 27.4(5) . . . . ?
C101 Ru1 Ru5 C501 -21.9(4) . . . . ?
O20 Ru1 Ru5 C501 -177.8(4) . . . . ?
N1 Ru1 Ru5 C501 167.3(4) . . . . ?
Ru3 Ru1 Ru5 C501 -105.4(3) . . . . ?
Ru8 Ru1 Ru5 C501 140.9(3) . . . . ?
Ru2 Ru1 Ru5 C501 -154.0(3) . . . . ?
C102 Ru1 Ru5 C502 119.4(4) . . . . ?
C101 Ru1 Ru5 C502 70.1(3) . . . . ?
O20 Ru1 Ru5 C502 -85.8(3) . . . . ?
N1 Ru1 Ru5 C502 -100.7(3) . . . . ?
Ru3 Ru1 Ru5 C502 -13.4(2) . . . . ?
Ru8 Ru1 Ru5 C502 -127.1(2) . . . . ?
Ru2 Ru1 Ru5 C502 -62.0(2) . . . . ?
C102 Ru1 Ru5 C403 -144.2(4) . . . . ?
C101 Ru1 Ru5 C403 166.5(4) . . . . ?
O20 Ru1 Ru5 C403 10.6(3) . . . . ?
N1 Ru1 Ru5 C403 -4.3(3) . . . . ?
Ru3 Ru1 Ru5 C403 83.0(3) . . . . ?
Ru8 Ru1 Ru5 C403 -30.7(3) . . . . ?
Ru2 Ru1 Ru5 C403 34.5(3) . . . . ?
C102 Ru1 Ru5 O20 -154.8(4) . . . . ?
C101 Ru1 Ru5 O20 156.0(3) . . . . ?
N1 Ru1 Ru5 O20 -14.8(2) . . . . ?
Ru3 Ru1 Ru5 O20 72.48(14) . . . . ?
Ru8 Ru1 Ru5 O20 -41.22(14) . . . . ?
Ru2 Ru1 Ru5 O20 23.90(14) . . . . ?
C102 Ru1 Ru5 N6 -60.4(4) . . . . ?
C101 Ru1 Ru5 N6 -109.6(3) . . . . ?
O20 Ru1 Ru5 N6 94.40(19) . . . . ?
N1 Ru1 Ru5 N6 79.57(19) . . . . ?
Ru3 Ru1 Ru5 N6 166.88(13) . . . . ?
Ru8 Ru1 Ru5 N6 53.18(13) . . . . ?
Ru2 Ru1 Ru5 N6 118.30(13) . . . . ?
C102 Ru1 Ru5 Ru4 -145.6(4) . . . . ?
C101 Ru1 Ru5 Ru4 165.1(3) . . . . ?
O20 Ru1 Ru5 Ru4 9.16(14) . . . . ?
N1 Ru1 Ru5 Ru4 -5.67(14) . . . . ?
Ru3 Ru1 Ru5 Ru4 81.64(3) . . . . ?
Ru8 Ru1 Ru5 Ru4 -32.064(16) . . . . ?
Ru2 Ru1 Ru5 Ru4 33.054(17) . . . . ?
Ru8 O10 Ru6 C601 -155.2(3) . . . . ?
Ru4 O10 Ru6 C601 -7.9(3) . . . . ?
Ru7 O10 Ru6 N3 -43.91(16) . . . . ?
Ru8 O10 Ru6 N3 32.9(3) . . . . ?
Ru4 O10 Ru6 N3 -179.9(3) . . . . ?
Ru7 O10 Ru6 Ru9 27.15(10) . . . . ?
Ru8 O10 Ru6 Ru9 103.9(2) . . . . ?
Ru4 O10 Ru6 Ru9 -108.8(2) . . . . ?
Ru8 O10 Ru6 Ru7 76.8(2) . . . . ?
Ru4 O10 Ru6 Ru7 -136.0(3) . . . . ?
Ru7 O10 Ru6 Ru2 -139.57(13) . . . . ?
Ru8 O10 Ru6 Ru2 -62.8(2) . . . . ?
Ru4 O10 Ru6 Ru2 84.5(2) . . . . ?
C11 N3 Ru6 C602 -23.1(5) . . . . ?
Ru7 N3 Ru6 C602 -144.2(2) . . . . ?
C11 N3 Ru6 O10 164.4(5) . . . . ?
Ru7 N3 Ru6 O10 43.33(14) . . . . ?
C11 N3 Ru6 Ru9 59.5(4) . . . . ?
Ru7 N3 Ru6 Ru9 -61.49(11) . . . . ?
C11 N3 Ru6 Ru7 121.0(5) . . . . ?
C11 N3 Ru6 Ru2 -137.8(4) . . . . ?
Ru7 N3 Ru6 Ru2 101.17(12) . . . . ?
C201 Ru2 Ru6 C602 -16.3(3) . . . . ?
C202 Ru2 Ru6 C602 70.4(3) . . . . ?
N1 Ru2 Ru6 C602 -111.2(3) . . . . ?
O20 Ru2 Ru6 C602 174.6(2) . . . . ?
Ru3 Ru2 Ru6 C602 -35.2(2) . . . . ?
Ru1 Ru2 Ru6 C602 -142.0(2) . . . . ?
Ru8 Ru2 Ru6 C602 -148.7(2) . . . . ?
C201 Ru2 Ru6 C601 -107.6(3) . . . . ?
C202 Ru2 Ru6 C601 -20.9(3) . . . . ?
N1 Ru2 Ru6 C601 157.5(2) . . . . ?
O20 Ru2 Ru6 C601 83.3(2) . . . . ?
Ru3 Ru2 Ru6 C601 -126.49(19) . . . . ?
Ru1 Ru2 Ru6 C601 126.72(19) . . . . ?
Ru8 Ru2 Ru6 C601 119.99(19) . . . . ?
C201 Ru2 Ru6 O10 157.1(3) . . . . ?
C202 Ru2 Ru6 O10 -116.2(2) . . . . ?
N1 Ru2 Ru6 O10 62.16(16) . . . . ?
O20 Ru2 Ru6 O10 -12.01(14) . . . . ?
Ru3 Ru2 Ru6 O10 138.19(11) . . . . ?
Ru1 Ru2 Ru6 O10 31.41(11) . . . . ?
Ru8 Ru2 Ru6 O10 24.67(11) . . . . ?
C201 Ru2 Ru6 N3 79.8(3) . . . . ?
C202 Ru2 Ru6 N3 166.6(2) . . . . ?
N1 Ru2 Ru6 N3 -15.08(18) . . . . ?
O20 Ru2 Ru6 N3 -89.25(16) . . . . ?
Ru3 Ru2 Ru6 N3 60.95(14) . . . . ?
Ru1 Ru2 Ru6 N3 -45.83(14) . . . . ?
Ru8 Ru2 Ru6 N3 -52.57(13) . . . . ?
C201 Ru2 Ru6 Ru9 123.9(3) . . . . ?
C202 Ru2 Ru6 Ru9 -149.4(2) . . . . ?
N1 Ru2 Ru6 Ru9 28.94(14) . . . . ?
O20 Ru2 Ru6 Ru9 -45.23(11) . . . . ?
Ru3 Ru2 Ru6 Ru9 104.97(6) . . . . ?
Ru1 Ru2 Ru6 Ru9 -1.81(7) . . . . ?
Ru8 Ru2 Ru6 Ru9 -8.55(5) . . . . ?
C201 Ru2 Ru6 Ru7 127.9(3) . . . . ?
C202 Ru2 Ru6 Ru7 -145.3(2) . . . . ?
N1 Ru2 Ru6 Ru7 33.02(13) . . . . ?
O20 Ru2 Ru6 Ru7 -41.15(9) . . . . ?
Ru3 Ru2 Ru6 Ru7 109.05(4) . . . . ?
Ru1 Ru2 Ru6 Ru7 2.27(3) . . . . ?
Ru8 Ru2 Ru6 Ru7 -4.465(16) . . . . ?
Ru6 O10 Ru7 C702 -125.5(2) . . . . ?
Ru8 O10 Ru7 C702 95.6(2) . . . . ?
Ru4 O10 Ru7 C702 12.6(3) . . . . ?
Ru6 O10 Ru7 N3 43.92(16) . . . . ?
Ru8 O10 Ru7 N3 -94.95(17) . . . . ?
Ru4 O10 Ru7 N3 -177.9(2) . . . . ?
Ru6 O10 Ru7 C801 135.58(18) . . . . ?
Ru8 O10 Ru7 C801 -3.29(18) . . . . ?
Ru4 O10 Ru7 C801 -86.2(2) . . . . ?
Ru6 O10 Ru7 Ru9 -27.40(10) . . . . ?
Ru8 O10 Ru7 Ru9 -166.27(7) . . . . ?
Ru4 O10 Ru7 Ru9 110.78(18) . . . . ?
Ru8 O10 Ru7 Ru6 -138.87(16) . . . . ?
Ru4 O10 Ru7 Ru6 138.2(3) . . . . ?
Ru6 O10 Ru7 Ru8 138.87(16) . . . . ?
Ru4 O10 Ru7 Ru8 -82.96(19) . . . . ?
C11 N3 Ru7 C701 27.0(5) . . . . ?
Ru6 N3 Ru7 C701 142.6(2) . . . . ?
C11 N3 Ru7 C702 -80.7(13) . . . . ?
Ru6 N3 Ru7 C702 35.0(13) . . . . ?
C11 N3 Ru7 O10 -159.2(5) . . . . ?
Ru6 N3 Ru7 O10 -43.57(14) . . . . ?
C11 N3 Ru7 C801 112.7(5) . . . . ?
Ru6 N3 Ru7 C801 -131.65(19) . . . . ?
C11 N3 Ru7 Ru9 -53.8(4) . . . . ?
Ru6 N3 Ru7 Ru9 61.90(11) . . . . ?
C11 N3 Ru7 Ru6 -115.7(5) . . . . ?
C11 N3 Ru7 Ru8 153.3(4) . . . . ?
Ru6 N3 Ru7 Ru8 -91.05(12) . . . . ?
O801 C801 Ru7 C701 -2.0(7) . . . . ?
Ru8 C801 Ru7 C701 179.6(3) . . . . ?
O801 C801 Ru7 C702 83.3(6) . . . . ?
Ru8 C801 Ru7 C702 -95.1(3) . . . . ?
O801 C801 Ru7 O10 -177.9(6) . . . . ?
Ru8 C801 Ru7 O10 3.7(2) . . . . ?
O801 C801 Ru7 N3 -99.2(6) . . . . ?
Ru8 C801 Ru7 N3 82.5(2) . . . . ?
O801 C801 Ru7 Ru9 -56.8(9) . . . . ?
Ru8 C801 Ru7 Ru9 124.8(4) . . . . ?
O801 C801 Ru7 Ru6 -140.2(6) . . . . ?
Ru8 C801 Ru7 Ru6 41.4(3) . . . . ?
O801 C801 Ru7 Ru8 178.4(8) . . . . ?
C602 Ru6 Ru7 C701 -2.6(4) . . . . ?
C601 Ru6 Ru7 C701 121.3(4) . . . . ?
O10 Ru6 Ru7 C701 -170.3(3) . . . . ?
N3 Ru6 Ru7 C701 -54.9(3) . . . . ?
Ru9 Ru6 Ru7 C701 41.6(3) . . . . ?
Ru2 Ru6 Ru7 C701 -136.5(3) . . . . ?
C602 Ru6 Ru7 C702 -120.6(4) . . . . ?
C601 Ru6 Ru7 C702 3.3(3) . . . . ?
O10 Ru6 Ru7 C702 71.8(3) . . . . ?
N3 Ru6 Ru7 C702 -172.8(3) . . . . ?
Ru9 Ru6 Ru7 C702 -76.4(2) . . . . ?
Ru2 Ru6 Ru7 C702 105.6(2) . . . . ?
C602 Ru6 Ru7 O10 167.6(3) . . . . ?
C601 Ru6 Ru7 O10 -68.4(3) . . . . ?
N3 Ru6 Ru7 O10 115.4(2) . . . . ?
Ru9 Ru6 Ru7 O10 -148.17(13) . . . . ?
Ru2 Ru6 Ru7 O10 33.81(13) . . . . ?
C602 Ru6 Ru7 N3 52.2(4) . . . . ?
C601 Ru6 Ru7 N3 176.2(3) . . . . ?
O10 Ru6 Ru7 N3 -115.4(2) . . . . ?
Ru9 Ru6 Ru7 N3 96.43(19) . . . . ?
Ru2 Ru6 Ru7 N3 -81.59(19) . . . . ?
C602 Ru6 Ru7 C801 112.9(3) . . . . ?
C601 Ru6 Ru7 C801 -123.2(3) . . . . ?
O10 Ru6 Ru7 C801 -54.7(2) . . . . ?
N3 Ru6 Ru7 C801 60.7(3) . . . . ?
Ru9 Ru6 Ru7 C801 157.10(18) . . . . ?
Ru2 Ru6 Ru7 C801 -20.92(18) . . . . ?
C602 Ru6 Ru7 Ru9 -44.2(3) . . . . ?
C601 Ru6 Ru7 Ru9 79.7(2) . . . . ?
O10 Ru6 Ru7 Ru9 148.17(13) . . . . ?
N3 Ru6 Ru7 Ru9 -96.43(19) . . . . ?
Ru2 Ru6 Ru7 Ru9 -178.02(2) . . . . ?
C602 Ru6 Ru7 Ru8 138.6(3) . . . . ?
C601 Ru6 Ru7 Ru8 -97.5(2) . . . . ?
O10 Ru6 Ru7 Ru8 -29.06(13) . . . . ?
N3 Ru6 Ru7 Ru8 86.34(19) . . . . ?
Ru9 Ru6 Ru7 Ru8 -177.23(2) . . . . ?
Ru2 Ru6 Ru7 Ru8 4.747(17) . . . . ?
Ru7 C801 Ru8 C802 173.2(3) . . . . ?
Ru7 C801 Ru8 Ru2 -56.3(3) . . . . ?
C1 N1 Ru8 C802 62.4(6) . . . . ?
Ru2 N1 Ru8 C802 -144.7(2) . . . . ?
Ru1 N1 Ru8 C802 -58.7(2) . . . . ?
C1 N1 Ru8 C801 -18.9(6) . . . . ?
Ru2 N1 Ru8 C801 134.0(2) . . . . ?
Ru1 N1 Ru8 C801 -139.9(2) . . . . ?
C1 N1 Ru8 N5 171.3(5) . . . . ?
Ru2 N1 Ru8 N5 -35.8(5) . . . . ?
Ru1 N1 Ru8 N5 50.2(5) . . . . ?
C1 N1 Ru8 O10 -120.8(6) . . . . ?
Ru2 N1 Ru8 O10 32.10(17) . . . . ?
Ru1 N1 Ru8 O10 118.12(15) . . . . ?
C1 N1 Ru8 O20 167.0(6) . . . . ?
Ru2 N1 Ru8 O20 -40.01(16) . . . . ?
Ru1 N1 Ru8 O20 46.02(14) . . . . ?
C1 N1 Ru8 Ru1 121.0(6) . . . . ?
Ru2 N1 Ru8 Ru1 -86.03(17) . . . . ?
C1 N1 Ru8 Ru7 -76.7(6) . . . . ?
Ru2 N1 Ru8 Ru7 76.20(15) . . . . ?
Ru1 N1 Ru8 Ru7 162.23(9) . . . . ?
C1 N1 Ru8 Ru4 -163.9(5) . . . . ?
Ru2 N1 Ru8 Ru4 -10.96(19) . . . . ?
Ru1 N1 Ru8 Ru4 75.07(14) . . . . ?
C1 N1 Ru8 Ru2 -152.9(7) . . . . ?
Ru1 N1 Ru8 Ru2 86.03(17) . . . . ?
C21 N5 Ru8 C802 14.1(4) . . . . ?
Ru4 N5 Ru8 C802 142.4(2) . . . . ?
C21 N5 Ru8 C801 95.3(4) . . . . ?
Ru4 N5 Ru8 C801 -136.4(2) . . . . ?
C21 N5 Ru8 N1 -94.6(5) . . . . ?
Ru4 N5 Ru8 N1 33.7(5) . . . . ?
C21 N5 Ru8 O10 -164.0(4) . . . . ?
Ru4 N5 Ru8 O10 -35.68(16) . . . . ?
C21 N5 Ru8 O20 -90.5(4) . . . . ?
Ru4 N5 Ru8 O20 37.82(15) . . . . ?
C21 N5 Ru8 Ru1 -56.7(4) . . . . ?
Ru4 N5 Ru8 Ru1 71.66(16) . . . . ?
C21 N5 Ru8 Ru7 149.8(4) . . . . ?
Ru4 N5 Ru8 Ru7 -81.92(14) . . . . ?
C21 N5 Ru8 Ru4 -128.3(5) . . . . ?
C21 N5 Ru8 Ru2 -119.8(4) . . . . ?
Ru4 N5 Ru8 Ru2 8.5(2) . . . . ?
Ru7 O10 Ru8 C801 4.2(2) . . . . ?
Ru6 O10 Ru8 C801 -71.6(3) . . . . ?
Ru4 O10 Ru8 C801 132.6(2) . . . . ?
Ru7 O10 Ru8 N1 110.92(15) . . . . ?
Ru6 O10 Ru8 N1 35.1(3) . . . . ?
Ru4 O10 Ru8 N1 -120.69(15) . . . . ?
Ru7 O10 Ru8 N5 -94.60(16) . . . . ?
Ru6 O10 Ru8 N5 -170.4(3) . . . . ?
Ru4 O10 Ru8 N5 33.79(16) . . . . ?
Ru7 O10 Ru8 O20 -175.75(15) . . . . ?
Ru6 O10 Ru8 O20 108.4(3) . . . . ?
Ru4 O10 Ru8 O20 -47.36(12) . . . . ?
Ru7 O10 Ru8 Ru1 154.65(6) . . . . ?
Ru6 O10 Ru8 Ru1 78.9(3) . . . . ?
Ru4 O10 Ru8 Ru1 -76.96(10) . . . . ?
Ru6 O10 Ru8 Ru7 -75.8(2) . . . . ?
Ru4 O10 Ru8 Ru7 128.39(16) . . . . ?
Ru7 O10 Ru8 Ru4 -128.39(16) . . . . ?
Ru6 O10 Ru8 Ru4 155.8(3) . . . . ?
Ru7 O10 Ru8 Ru2 136.59(14) . . . . ?
Ru6 O10 Ru8 Ru2 60.8(2) . . . . ?
Ru4 O10 Ru8 Ru2 -95.02(11) . . . . ?
Ru1 O20 Ru8 C802 42.9(2) . . . . ?
Ru5 O20 Ru8 C802 -47.0(3) . . . . ?
Ru4 O20 Ru8 C802 -128.6(2) . . . . ?
Ru2 O20 Ru8 C802 126.2(2) . . . . ?
Ru1 O20 Ru8 N1 -46.87(16) . . . . ?
Ru5 O20 Ru8 N1 -136.8(2) . . . . ?
Ru4 O20 Ru8 N1 141.66(18) . . . . ?
Ru2 O20 Ru8 N1 36.48(16) . . . . ?
Ru1 O20 Ru8 N5 135.11(17) . . . . ?
Ru5 O20 Ru8 N5 45.2(2) . . . . ?
Ru4 O20 Ru8 N5 -36.36(15) . . . . ?
Ru2 O20 Ru8 N5 -141.55(17) . . . . ?
Ru1 O20 Ru8 O10 -140.28(15) . . . . ?
Ru5 O20 Ru8 O10 129.8(2) . . . . ?
Ru4 O20 Ru8 O10 48.24(12) . . . . ?
Ru2 O20 Ru8 O10 -56.94(13) . . . . ?
Ru5 O20 Ru8 Ru1 -89.9(2) . . . . ?
Ru4 O20 Ru8 Ru1 -171.47(17) . . . . ?
Ru2 O20 Ru8 Ru1 83.34(12) . . . . ?
Ru1 O20 Ru8 Ru7 -143.78(6) . . . . ?
Ru5 O20 Ru8 Ru7 126.31(15) . . . . ?
Ru4 O20 Ru8 Ru7 44.75(13) . . . . ?
Ru2 O20 Ru8 Ru7 -60.44(13) . . . . ?
Ru1 O20 Ru8 Ru4 171.47(17) . . . . ?
Ru5 O20 Ru8 Ru4 81.57(18) . . . . ?
Ru2 O20 Ru8 Ru4 -105.19(15) . . . . ?
Ru1 O20 Ru8 Ru2 -83.34(12) . . . . ?
Ru5 O20 Ru8 Ru2 -173.2(3) . . . . ?
Ru4 O20 Ru8 Ru2 105.19(15) . . . . ?
C102 Ru1 Ru8 C802 40.0(3) . . . . ?
C101 Ru1 Ru8 C802 -73.5(4) . . . . ?
O20 Ru1 Ru8 C802 -135.8(2) . . . . ?
N1 Ru1 Ru8 C802 115.2(3) . . . . ?
Ru3 Ru1 Ru8 C802 138.8(2) . . . . ?
Ru2 Ru1 Ru8 C802 166.8(2) . . . . ?
Ru5 Ru1 Ru8 C802 -98.7(2) . . . . ?
C102 Ru1 Ru8 C801 -9.6(4) . . . . ?
C101 Ru1 Ru8 C801 -123.1(5) . . . . ?
O20 Ru1 Ru8 C801 174.6(3) . . . . ?
N1 Ru1 Ru8 C801 65.6(3) . . . . ?
Ru3 Ru1 Ru8 C801 89.2(3) . . . . ?
Ru2 Ru1 Ru8 C801 117.1(3) . . . . ?
Ru5 Ru1 Ru8 C801 -148.3(3) . . . . ?
C102 Ru1 Ru8 N1 -75.2(3) . . . . ?
C101 Ru1 Ru8 N1 171.3(4) . . . . ?
O20 Ru1 Ru8 N1 109.0(2) . . . . ?
Ru3 Ru1 Ru8 N1 23.62(17) . . . . ?
Ru2 Ru1 Ru8 N1 51.55(17) . . . . ?
Ru5 Ru1 Ru8 N1 146.09(17) . . . . ?
C102 Ru1 Ru8 N5 127.3(3) . . . . ?
C101 Ru1 Ru8 N5 13.8(4) . . . . ?
O20 Ru1 Ru8 N5 -48.49(18) . . . . ?
N1 Ru1 Ru8 N5 -157.5(2) . . . . ?
Ru3 Ru1 Ru8 N5 -133.92(14) . . . . ?
Ru2 Ru1 Ru8 N5 -105.98(14) . . . . ?
Ru5 Ru1 Ru8 N5 -11.44(14) . . . . ?
C102 Ru1 Ru8 O10 -144.1(3) . . . . ?
C101 Ru1 Ru8 O10 102.4(4) . . . . ?
O20 Ru1 Ru8 O10 40.13(16) . . . . ?
N1 Ru1 Ru8 O10 -68.9(2) . . . . ?
Ru3 Ru1 Ru8 O10 -45.30(10) . . . . ?
Ru2 Ru1 Ru8 O10 -17.36(10) . . . . ?
Ru5 Ru1 Ru8 O10 77.17(10) . . . . ?
C102 Ru1 Ru8 O20 175.8(3) . . . . ?
C101 Ru1 Ru8 O20 62.3(4) . . . . ?
N1 Ru1 Ru8 O20 -109.0(2) . . . . ?
Ru3 Ru1 Ru8 O20 -85.43(13) . . . . ?
Ru2 Ru1 Ru8 O20 -57.49(13) . . . . ?
Ru5 Ru1 Ru8 O20 37.04(13) . . . . ?
C102 Ru1 Ru8 Ru7 -108.8(3) . . . . ?
C101 Ru1 Ru8 Ru7 137.7(4) . . . . ?
O20 Ru1 Ru8 Ru7 75.46(13) . . . . ?
N1 Ru1 Ru8 Ru7 -33.59(18) . . . . ?
Ru3 Ru1 Ru8 Ru7 -9.97(5) . . . . ?
Ru2 Ru1 Ru8 Ru7 17.96(3) . . . . ?
Ru5 Ru1 Ru8 Ru7 112.50(3) . . . . ?
C102 Ru1 Ru8 Ru4 169.5(3) . . . . ?
C101 Ru1 Ru8 Ru4 56.0(4) . . . . ?
O20 Ru1 Ru8 Ru4 -6.24(13) . . . . ?
N1 Ru1 Ru8 Ru4 -115.28(17) . . . . ?
Ru3 Ru1 Ru8 Ru4 -91.66(2) . . . . ?
Ru2 Ru1 Ru8 Ru4 -63.729(15) . . . . ?
Ru5 Ru1 Ru8 Ru4 30.808(15) . . . . ?
C102 Ru1 Ru8 Ru2 -126.7(3) . . . . ?
C101 Ru1 Ru8 Ru2 119.8(4) . . . . ?
O20 Ru1 Ru8 Ru2 57.49(13) . . . . ?
N1 Ru1 Ru8 Ru2 -51.55(17) . . . . ?
Ru3 Ru1 Ru8 Ru2 -27.94(2) . . . . ?
Ru5 Ru1 Ru8 Ru2 94.538(16) . . . . ?
C701 Ru7 Ru8 C802 -10.1(4) . . . . ?
C702 Ru7 Ru8 C802 82.5(4) . . . . ?
O10 Ru7 Ru8 C802 175.4(3) . . . . ?
N3 Ru7 Ru8 C802 -106.2(3) . . . . ?
C801 Ru7 Ru8 C802 -9.7(4) . . . . ?
Ru9 Ru7 Ru8 C802 -159.5(3) . . . . ?
Ru6 Ru7 Ru8 C802 -155.1(3) . . . . ?
C701 Ru7 Ru8 C801 -0.5(3) . . . . ?
C702 Ru7 Ru8 C801 92.1(3) . . . . ?
O10 Ru7 Ru8 C801 -175.0(3) . . . . ?
N3 Ru7 Ru8 C801 -96.6(3) . . . . ?
Ru9 Ru7 Ru8 C801 -149.8(2) . . . . ?
Ru6 Ru7 Ru8 C801 -145.5(2) . . . . ?
C701 Ru7 Ru8 N1 100.6(3) . . . . ?
C702 Ru7 Ru8 N1 -166.8(2) . . . . ?
O10 Ru7 Ru8 N1 -73.93(18) . . . . ?
N3 Ru7 Ru8 N1 4.47(18) . . . . ?
C801 Ru7 Ru8 N1 101.0(3) . . . . ?
Ru9 Ru7 Ru8 N1 -48.76(13) . . . . ?
Ru6 Ru7 Ru8 N1 -44.43(13) . . . . ?
C701 Ru7 Ru8 N5 -104.7(3) . . . . ?
C702 Ru7 Ru8 N5 -12.1(2) . . . . ?
O10 Ru7 Ru8 N5 80.79(18) . . . . ?
N3 Ru7 Ru8 N5 159.19(18) . . . . ?
C801 Ru7 Ru8 N5 -104.2(3) . . . . ?
Ru9 Ru7 Ru8 N5 105.96(13) . . . . ?
Ru6 Ru7 Ru8 N5 110.29(12) . . . . ?
C701 Ru7 Ru8 O10 174.5(3) . . . . ?
C702 Ru7 Ru8 O10 -92.9(2) . . . . ?
N3 Ru7 Ru8 O10 78.40(18) . . . . ?
C801 Ru7 Ru8 O10 175.0(3) . . . . ?
Ru9 Ru7 Ru8 O10 25.18(13) . . . . ?
Ru6 Ru7 Ru8 O10 29.51(13) . . . . ?
C701 Ru7 Ru8 O20 179.1(3) . . . . ?
C702 Ru7 Ru8 O20 -88.3(2) . . . . ?
O10 Ru7 Ru8 O20 4.61(16) . . . . ?
N3 Ru7 Ru8 O20 83.01(16) . . . . ?
C801 Ru7 Ru8 O20 179.6(3) . . . . ?
Ru9 Ru7 Ru8 O20 29.78(11) . . . . ?
Ru6 Ru7 Ru8 O20 34.12(11) . . . . ?
C701 Ru7 Ru8 Ru1 125.5(3) . . . . ?
C702 Ru7 Ru8 Ru1 -141.88(19) . . . . ?
O10 Ru7 Ru8 Ru1 -48.99(13) . . . . ?
N3 Ru7 Ru8 Ru1 29.41(13) . . . . ?
C801 Ru7 Ru8 Ru1 126.0(2) . . . . ?
Ru9 Ru7 Ru8 Ru1 -23.82(6) . . . . ?
Ru6 Ru7 Ru8 Ru1 -19.49(4) . . . . ?
C701 Ru7 Ru8 Ru4 -149.6(3) . . . . ?
C702 Ru7 Ru8 Ru4 -57.00(19) . . . . ?
O10 Ru7 Ru8 Ru4 35.88(13) . . . . ?
N3 Ru7 Ru8 Ru4 114.28(13) . . . . ?
C801 Ru7 Ru8 Ru4 -149.1(2) . . . . ?
Ru9 Ru7 Ru8 Ru4 61.06(4) . . . . ?
Ru6 Ru7 Ru8 Ru4 65.390(16) . . . . ?
C701 Ru7 Ru8 Ru2 140.6(3) . . . . ?
C702 Ru7 Ru8 Ru2 -126.80(19) . . . . ?
O10 Ru7 Ru8 Ru2 -33.92(13) . . . . ?
N3 Ru7 Ru8 Ru2 44.49(13) . . . . ?
C801 Ru7 Ru8 Ru2 141.1(2) . . . . ?
Ru9 Ru7 Ru8 Ru2 -8.74(4) . . . . ?
Ru6 Ru7 Ru8 Ru2 -4.409(16) . . . . ?
C401 Ru4 Ru8 C802 -103.1(4) . . . . ?
C402 Ru4 Ru8 C802 125.3(4) . . . . ?
C403 Ru4 Ru8 C802 10.4(3) . . . . ?
N5 Ru4 Ru8 C802 -50.7(3) . . . . ?
O20 Ru4 Ru8 C802 73.8(3) . . . . ?
O10 Ru4 Ru8 C802 -179.6(3) . . . . ?
Ru5 Ru4 Ru8 C802 35.0(3) . . . . ?
C401 Ru4 Ru8 C801 8.6(3) . . . . ?
C402 Ru4 Ru8 C801 -123.0(4) . . . . ?
C403 Ru4 Ru8 C801 122.1(3) . . . . ?
N5 Ru4 Ru8 C801 60.9(3) . . . . ?
O20 Ru4 Ru8 C801 -174.5(3) . . . . ?
O10 Ru4 Ru8 C801 -68.0(3) . . . . ?
Ru5 Ru4 Ru8 C801 146.6(3) . . . . ?
C401 Ru4 Ru8 N1 143.5(3) . . . . ?
C402 Ru4 Ru8 N1 11.9(3) . . . . ?
C403 Ru4 Ru8 N1 -103.0(3) . . . . ?
N5 Ru4 Ru8 N1 -164.1(2) . . . . ?
O20 Ru4 Ru8 N1 -39.57(19) . . . . ?
O10 Ru4 Ru8 N1 66.96(19) . . . . ?
Ru5 Ru4 Ru8 N1 -78.42(14) . . . . ?
C401 Ru4 Ru8 N5 -52.3(3) . . . . ?
C402 Ru4 Ru8 N5 176.0(4) . . . . ?
C403 Ru4 Ru8 N5 61.2(3) . . . . ?
O20 Ru4 Ru8 N5 124.6(2) . . . . ?
O10 Ru4 Ru8 N5 -128.9(2) . . . . ?
Ru5 Ru4 Ru8 N5 85.7(2) . . . . ?
C401 Ru4 Ru8 O10 76.6(3) . . . . ?
C402 Ru4 Ru8 O10 -55.0(3) . . . . ?
C403 Ru4 Ru8 O10 -169.9(3) . . . . ?
N5 Ru4 Ru8 O10 128.9(2) . . . . ?
O20 Ru4 Ru8 O10 -106.53(18) . . . . ?
Ru5 Ru4 Ru8 O10 -145.39(13) . . . . ?
C401 Ru4 Ru8 O20 -176.9(3) . . . . ?
C402 Ru4 Ru8 O20 51.5(3) . . . . ?
C403 Ru4 Ru8 O20 -63.4(2) . . . . ?
N5 Ru4 Ru8 O20 -124.6(2) . . . . ?
O10 Ru4 Ru8 O20 106.53(18) . . . . ?
Ru5 Ru4 Ru8 O20 -38.85(13) . . . . ?
C401 Ru4 Ru8 Ru1 -170.7(2) . . . . ?
C402 Ru4 Ru8 Ru1 57.7(3) . . . . ?
C403 Ru4 Ru8 Ru1 -57.2(2) . . . . ?
N5 Ru4 Ru8 Ru1 -118.3(2) . . . . ?
O20 Ru4 Ru8 Ru1 6.23(13) . . . . ?
O10 Ru4 Ru8 Ru1 112.76(13) . . . . ?
Ru5 Ru4 Ru8 Ru1 -32.625(17) . . . . ?
C401 Ru4 Ru8 Ru7 41.7(2) . . . . ?
C402 Ru4 Ru8 Ru7 -90.0(3) . . . . ?
C403 Ru4 Ru8 Ru7 155.2(2) . . . . ?
N5 Ru4 Ru8 Ru7 94.0(2) . . . . ?
O20 Ru4 Ru8 Ru7 -141.44(13) . . . . ?
O10 Ru4 Ru8 Ru7 -34.91(13) . . . . ?
Ru5 Ru4 Ru8 Ru7 179.709(16) . . . . ?
C401 Ru4 Ru8 Ru2 135.9(2) . . . . ?
C402 Ru4 Ru8 Ru2 4.2(3) . . . . ?
C403 Ru4 Ru8 Ru2 -110.6(2) . . . . ?
N5 Ru4 Ru8 Ru2 -171.8(2) . . . . ?
O20 Ru4 Ru8 Ru2 -47.26(13) . . . . ?
O10 Ru4 Ru8 Ru2 59.28(13) . . . . ?
Ru5 Ru4 Ru8 Ru2 -86.108(16) . . . . ?
C201 Ru2 Ru8 C802 101.8(4) . . . . ?
C202 Ru2 Ru8 C802 -117.1(4) . . . . ?
N1 Ru2 Ru8 C802 45.7(3) . . . . ?
O20 Ru2 Ru8 C802 -74.9(3) . . . . ?
Ru3 Ru2 Ru8 C802 11.0(2) . . . . ?
Ru1 Ru2 Ru8 C802 -15.5(2) . . . . ?
Ru6 Ru2 Ru8 C802 159.2(2) . . . . ?
C201 Ru2 Ru8 C801 -9.7(4) . . . . ?
C202 Ru2 Ru8 C801 131.4(4) . . . . ?
N1 Ru2 Ru8 C801 -65.8(3) . . . . ?
O20 Ru2 Ru8 C801 173.6(3) . . . . ?
Ru3 Ru2 Ru8 C801 -100.5(3) . . . . ?
Ru1 Ru2 Ru8 C801 -127.0(3) . . . . ?
Ru6 Ru2 Ru8 C801 47.8(3) . . . . ?
C201 Ru2 Ru8 N1 56.1(3) . . . . ?
C202 Ru2 Ru8 N1 -162.8(4) . . . . ?
O20 Ru2 Ru8 N1 -120.5(2) . . . . ?
Ru3 Ru2 Ru8 N1 -34.68(19) . . . . ?
Ru1 Ru2 Ru8 N1 -61.19(19) . . . . ?
Ru6 Ru2 Ru8 N1 113.59(19) . . . . ?
C201 Ru2 Ru8 N5 -141.1(3) . . . . ?
C202 Ru2 Ru8 N5 0.0(4) . . . . ?
N1 Ru2 Ru8 N5 162.8(2) . . . . ?
O20 Ru2 Ru8 N5 42.2(2) . . . . ?
Ru3 Ru2 Ru8 N5 128.09(15) . . . . ?
Ru1 Ru2 Ru8 N5 101.58(15) . . . . ?
Ru6 Ru2 Ru8 N5 -83.65(15) . . . . ?
C201 Ru2 Ru8 O10 -83.0(3) . . . . ?
C202 Ru2 Ru8 O10 58.1(4) . . . . ?
N1 Ru2 Ru8 O10 -139.1(2) . . . . ?
O20 Ru2 Ru8 O10 100.34(17) . . . . ?
Ru3 Ru2 Ru8 O10 -173.81(11) . . . . ?
Ru1 Ru2 Ru8 O10 159.68(11) . . . . ?
Ru6 Ru2 Ru8 O10 -25.55(11) . . . . ?
C201 Ru2 Ru8 O20 176.6(3) . . . . ?
C202 Ru2 Ru8 O20 -42.3(4) . . . . ?
N1 Ru2 Ru8 O20 120.5(2) . . . . ?
Ru3 Ru2 Ru8 O20 85.84(14) . . . . ?
Ru1 Ru2 Ru8 O20 59.33(13) . . . . ?
Ru6 Ru2 Ru8 O20 -125.90(14) . . . . ?
C201 Ru2 Ru8 Ru1 117.3(3) . . . . ?
C202 Ru2 Ru8 Ru1 -101.6(4) . . . . ?
N1 Ru2 Ru8 Ru1 61.19(19) . . . . ?
O20 Ru2 Ru8 Ru1 -59.33(13) . . . . ?
Ru3 Ru2 Ru8 Ru1 26.509(19) . . . . ?
Ru6 Ru2 Ru8 Ru1 174.771(19) . . . . ?
C201 Ru2 Ru8 Ru7 -53.2(3) . . . . ?
C202 Ru2 Ru8 Ru7 87.9(4) . . . . ?
N1 Ru2 Ru8 Ru7 -109.30(19) . . . . ?
O20 Ru2 Ru8 Ru7 130.18(14) . . . . ?
Ru3 Ru2 Ru8 Ru7 -143.97(2) . . . . ?
Ru1 Ru2 Ru8 Ru7 -170.482(19) . . . . ?
Ru6 Ru2 Ru8 Ru7 4.288(15) . . . . ?
C201 Ru2 Ru8 Ru4 -134.8(3) . . . . ?
C202 Ru2 Ru8 Ru4 6.3(4) . . . . ?
N1 Ru2 Ru8 Ru4 169.12(19) . . . . ?
O20 Ru2 Ru8 Ru4 48.60(13) . . . . ?
Ru3 Ru2 Ru8 Ru4 134.45(2) . . . . ?
Ru1 Ru2 Ru8 Ru4 107.938(17) . . . . ?
Ru6 Ru2 Ru8 Ru4 -77.291(15) . . . . ?
C11 N4 Ru9 C903 12.0(12) . . . . ?
C15 N4 Ru9 C903 -162.0(9) . . . . ?
C11 N4 Ru9 C902 129.4(5) . . . . ?
C15 N4 Ru9 C902 -44.5(6) . . . . ?
C11 N4 Ru9 C901 -135.1(5) . . . . ?
C15 N4 Ru9 C901 51.0(6) . . . . ?
C11 N4 Ru9 Ru7 -34.2(4) . . . . ?
C15 N4 Ru9 Ru7 151.9(5) . . . . ?
C11 N4 Ru9 Ru6 29.1(4) . . . . ?
C15 N4 Ru9 Ru6 -144.8(5) . . . . ?
C701 Ru7 Ru9 C903 126.1(3) . . . . ?
C702 Ru7 Ru9 C903 40.8(3) . . . . ?
O10 Ru7 Ru9 C903 -59.7(2) . . . . ?
N3 Ru7 Ru9 C903 -134.4(2) . . . . ?
C801 Ru7 Ru9 C903 -178.8(5) . . . . ?
Ru6 Ru7 Ru9 C903 -83.4(2) . . . . ?
Ru8 Ru7 Ru9 C903 -78.3(2) . . . . ?
C701 Ru7 Ru9 C902 -153.5(8) . . . . ?
C702 Ru7 Ru9 C902 121.3(7) . . . . ?
O10 Ru7 Ru9 C902 20.8(7) . . . . ?
N3 Ru7 Ru9 C902 -53.9(7) . . . . ?
C801 Ru7 Ru9 C902 -98.3(9) . . . . ?
Ru6 Ru7 Ru9 C902 -2.9(7) . . . . ?
Ru8 Ru7 Ru9 C902 2.2(7) . . . . ?
C701 Ru7 Ru9 C901 33.5(4) . . . . ?
C702 Ru7 Ru9 C901 -51.8(3) . . . . ?
O10 Ru7 Ru9 C901 -152.2(3) . . . . ?
N3 Ru7 Ru9 C901 133.0(3) . . . . ?
C801 Ru7 Ru9 C901 88.7(5) . . . . ?
Ru6 Ru7 Ru9 C901 -176.0(3) . . . . ?
Ru8 Ru7 Ru9 C901 -170.9(3) . . . . ?
C701 Ru7 Ru9 N4 -64.3(3) . . . . ?
C702 Ru7 Ru9 N4 -149.6(2) . . . . ?
O10 Ru7 Ru9 N4 109.94(17) . . . . ?
N3 Ru7 Ru9 N4 35.18(19) . . . . ?
C801 Ru7 Ru9 N4 -9.2(5) . . . . ?
Ru6 Ru7 Ru9 N4 86.19(14) . . . . ?
Ru8 Ru7 Ru9 N4 91.25(14) . . . . ?
C701 Ru7 Ru9 Ru6 -150.5(2) . . . . ?
C702 Ru7 Ru9 Ru6 124.18(18) . . . . ?
O10 Ru7 Ru9 Ru6 23.75(10) . . . . ?
N3 Ru7 Ru9 Ru6 -51.00(13) . . . . ?
C801 Ru7 Ru9 Ru6 -95.4(5) . . . . ?
Ru8 Ru7 Ru9 Ru6 5.07(4) . . . . ?
C602 Ru6 Ru9 C903 -122.8(3) . . . . ?
C601 Ru6 Ru9 C903 -35.0(3) . . . . ?
O10 Ru6 Ru9 C903 64.7(2) . . . . ?
N3 Ru6 Ru9 C903 139.2(2) . . . . ?
Ru7 Ru6 Ru9 C903 88.2(2) . . . . ?
Ru2 Ru6 Ru9 C903 93.0(2) . . . . ?
C602 Ru6 Ru9 C902 -31.9(3) . . . . ?
C601 Ru6 Ru9 C902 55.9(3) . . . . ?
O10 Ru6 Ru9 C902 155.6(2) . . . . ?
N3 Ru6 Ru9 C902 -129.8(2) . . . . ?
Ru7 Ru6 Ru9 C902 179.2(2) . . . . ?
Ru2 Ru6 Ru9 C902 -176.1(2) . . . . ?
C602 Ru6 Ru9 C901 163.4(11) . . . . ?
C601 Ru6 Ru9 C901 -108.8(11) . . . . ?
O10 Ru6 Ru9 C901 -9.1(10) . . . . ?
N3 Ru6 Ru9 C901 65.5(10) . . . . ?
Ru7 Ru6 Ru9 C901 14.4(10) . . . . ?
Ru2 Ru6 Ru9 C901 19.2(10) . . . . ?
C602 Ru6 Ru9 N4 61.4(2) . . . . ?
C601 Ru6 Ru9 N4 149.2(2) . . . . ?
O10 Ru6 Ru9 N4 -111.07(16) . . . . ?
N3 Ru6 Ru9 N4 -36.49(19) . . . . ?
Ru7 Ru6 Ru9 N4 -87.53(13) . . . . ?
Ru2 Ru6 Ru9 N4 -82.76(14) . . . . ?
C602 Ru6 Ru9 Ru7 149.0(2) . . . . ?
C601 Ru6 Ru9 Ru7 -123.25(18) . . . . ?
O10 Ru6 Ru9 Ru7 -23.55(9) . . . . ?
N3 Ru6 Ru9 Ru7 51.04(13) . . . . ?
Ru2 Ru6 Ru9 Ru7 4.76(5) . . . . ?
 
_diffrn_measured_fraction_theta_max    0.988
_diffrn_reflns_theta_full              68.54
_diffrn_measured_fraction_theta_full   0.988
_refine_diff_density_max    0.959
_refine_diff_density_min   -0.858
_refine_diff_density_rms    0.149

#===END

data_7_(pg106mm)
 
_audit_creation_method            SHELXL-97
_chemical_name_systematic
;
 ?
;
_chemical_name_common             ?
_chemical_melting_point           ?
_chemical_formula_moiety          
 'C38 H20 N6 O22 Ru9, 0.25(C7 H8)'
_chemical_formula_sum
 'C39.75 H22 N6 O22 Ru9'
_chemical_formula_weight          1845.27
_chemical_compound_source
;
Synthesis. Crystallization from a toluene/
hexanes solution 
at room temperature by slow liquid-liquid difussion.
;
 
loop_
 _atom_type_symbol
 _atom_type_description
 _atom_type_scat_dispersion_real
 _atom_type_scat_dispersion_imag
 _atom_type_scat_source
 'C'  'C'   0.0033   0.0016
 'International Tables Vol C Tables 4.2.6.8 and 6.1.1.4'
 'H'  'H'   0.0000   0.0000
 'International Tables Vol C Tables 4.2.6.8 and 6.1.1.4'
 'N'  'N'   0.0061   0.0033
 'International Tables Vol C Tables 4.2.6.8 and 6.1.1.4'
 'O'  'O'   0.0106   0.0060
 'International Tables Vol C Tables 4.2.6.8 and 6.1.1.4'
 'Ru'  'Ru'  -1.2594   0.8363
 'International Tables Vol C Tables 4.2.6.8 and 6.1.1.4'
 
_symmetry_cell_setting            Triclinic 
_symmetry_space_group_name_H-M    P-1 
_symmetry_space_group_name_Hall    '-P 1' 
 
loop_
 _symmetry_equiv_pos_as_xyz
 'x, y, z'
 '-x, -y, -z'
 
_cell_length_a                    11.049(5)
_cell_length_b                    14.805(7)
_cell_length_c                    17.931(9)
_cell_angle_alpha                 94.583(10)
_cell_angle_beta                  97.112(9)
_cell_angle_gamma                 94.107(9)
_cell_volume                      2891(2)
_cell_formula_units_Z             2
_cell_measurement_temperature     296(2)
_cell_measurement_reflns_used     ?
_cell_measurement_theta_min       ?
_cell_measurement_theta_max       ?
 
_exptl_crystal_description        BLOCK 
_exptl_crystal_colour             BLACK 
_exptl_crystal_size_max           0.22 
_exptl_crystal_size_mid           0.18 
_exptl_crystal_size_min           0.13 
_exptl_crystal_density_meas       ? 
_exptl_crystal_density_diffrn     2.120 
_exptl_crystal_density_method     'not measured' 
_exptl_crystal_F_000              1749 
_exptl_absorpt_coefficient_mu     2.355 
_exptl_absorpt_correction_type    empirical 
_exptl_absorpt_correction_T_min   0.582 
_exptl_absorpt_correction_T_max   0.731 
_exptl_absorpt_process_details    
;
Sheldrick, G. M. SADABS, Empirical Absorption 
Correction Program; University of Gottingen, 
Gottingen, Germany, 1997.
; 
_exptl_special_details
;
 ?
;
 
_diffrn_ambient_temperature       296(2) 
_diffrn_radiation_wavelength      0.71073 
_diffrn_radiation_type            MoK\a 
_diffrn_radiation_source          'fine-focus sealed tube' 
_diffrn_radiation_monochromator   graphite 
_diffrn_measurement_device_type   'CCD area detector' 
_diffrn_measurement_method        'phi and omega scans' 
_diffrn_detector_area_resol_mean  ?
_diffrn_standards_number          ?
_diffrn_standards_interval_count  ?
_diffrn_standards_interval_time   ?
_diffrn_standards_decay_%         ?
_diffrn_reflns_number             12695
_diffrn_reflns_av_R_equivalents   0.0297
_diffrn_reflns_av_sigmaI/netI     0.0324
_diffrn_reflns_limit_h_min        -12
_diffrn_reflns_limit_h_max        12
_diffrn_reflns_limit_k_min        -16
_diffrn_reflns_limit_k_max        16
_diffrn_reflns_limit_l_min        -19
_diffrn_reflns_limit_l_max        11
_diffrn_reflns_theta_min          1.72
_diffrn_reflns_theta_max          23.31
_reflns_number_total              8142
_reflns_number_gt                 6422
_reflns_threshold_expression      >2sigma(I)
 
_computing_data_collection        'Bruker SMART' 
_computing_cell_refinement        'Bruker SMART' 
_computing_data_reduction         'Bruker SHELXTL' 
_computing_structure_solution     'SHELXS-97 (Sheldrick, 1990)' 
_computing_structure_refinement   'SHELXL-97 (Sheldrick, 1997)' 
_computing_molecular_graphics     'Bruker SHELXTL' 
_computing_publication_material   'Bruker SHELXTL' 
 
_refine_special_details
;
 Refinement of F^2^ against ALL reflections.  The weighted R-factor wR and
 goodness of fit S are based on F^2^, conventional R-factors R are based
 on F, with F set to zero for negative F^2^. The threshold expression of
 F^2^ > 2sigma(F^2^) is used only for calculating R-factors(gt) etc. and is
 not relevant to the choice of reflections for refinement.  R-factors based
 on F^2^ are statistically about twice as large as those based on F, and R-
 factors based on ALL data will be even larger.
;
 
_refine_ls_structure_factor_coef  Fsqd
_refine_ls_matrix_type            full
_refine_ls_weighting_scheme       calc
_refine_ls_weighting_details
; calc
 [1.00000+-1.00000exp(-19.00(sin\q/\l)^2^)]/
   [\s^2^(Fo^2^)+0.0000+62.3694*P+(0.0751P)^2^+0.0000sin\q/\l]
 where P = 0.33333Fo^2^ + 0.66667Fc^2^
;
_atom_sites_solution_primary      direct
_atom_sites_solution_secondary    difmap
_atom_sites_solution_hydrogens    geom
_refine_ls_hydrogen_treatment     constr
_refine_ls_extinction_method      none
_refine_ls_extinction_coef        ?
_refine_ls_number_reflns          8142
_refine_ls_number_parameters      696
_refine_ls_number_restraints      0
_refine_ls_R_factor_all           0.0830
_refine_ls_R_factor_gt            0.0626
_refine_ls_wR_factor_ref          0.1814
_refine_ls_wR_factor_gt           0.1529
_refine_ls_goodness_of_fit_ref    0.995
_refine_ls_restrained_S_all       0.995
_refine_ls_shift/su_max           0.001
_refine_ls_shift/su_mean          0.000
 
loop_
 _atom_site_label
 _atom_site_type_symbol
 _atom_site_fract_x
 _atom_site_fract_y
 _atom_site_fract_z
 _atom_site_U_iso_or_equiv
 _atom_site_adp_type
 _atom_site_occupancy
 _atom_site_symmetry_multiplicity
 _atom_site_calc_flag
 _atom_site_refinement_flags
 _atom_site_disorder_assembly
 _atom_site_disorder_group
C1 C 0.6766(10) 0.6951(9) 0.6495(7) 0.037(3) Uani 1 1 d . . .
C2 C 0.5577(13) 0.7091(11) 0.6663(9) 0.057(4) Uani 1 1 d . . .
H2 H 0.5433 0.7341 0.7133 0.068 Uiso 1 1 calc R . .
C3 C 0.4616(12) 0.6826(11) 0.6070(10) 0.062(4) Uani 1 1 d . . .
H3A H 0.3816 0.6907 0.6154 0.074 Uiso 1 1 calc R . .
C4 C 0.4823(14) 0.6453(11) 0.5372(10) 0.065(4) Uani 1 1 d . . .
H4 H 0.4173 0.6298 0.4992 0.078 Uiso 1 1 calc R . .
C5 C 0.5998(13) 0.6312(10) 0.5244(9) 0.054(4) Uani 1 1 d . . .
C6 C 0.6257(14) 0.5966(11) 0.4483(9) 0.058(4) Uani 1 1 d . . .
H6A H 0.6637 0.5405 0.4517 0.088 Uiso 1 1 calc R . .
H6B H 0.6797 0.6405 0.4294 0.088 Uiso 1 1 calc R . .
H6C H 0.5505 0.5864 0.4146 0.088 Uiso 1 1 calc R . .
O10 O 0.9180(7) 0.8914(6) 0.7655(4) 0.0362(18) Uani 1 1 d . . .
C11 C 0.6169(11) 0.9794(11) 0.6468(8) 0.050(4) Uani 1 1 d . . .
C12 C 0.5203(14) 0.9339(14) 0.6028(9) 0.066(4) Uani 1 1 d . . .
H12 H 0.5191 0.8715 0.5911 0.079 Uiso 1 1 calc R . .
C13 C 0.4226(17) 0.981(2) 0.5750(12) 0.098(8) Uani 1 1 d . . .
H13 H 0.3552 0.9517 0.5439 0.118 Uiso 1 1 calc R . .
C14 C 0.430(2) 1.076(2) 0.5962(14) 0.103(9) Uani 1 1 d . . .
H14 H 0.3654 1.1098 0.5801 0.123 Uiso 1 1 calc R . .
C15 C 0.5299(17) 1.1191(16) 0.6394(12) 0.081(6) Uani 1 1 d . . .
C16 C 0.540(3) 1.2225(19) 0.6610(19) 0.141(12) Uani 1 1 d . . .
H16A H 0.5972 1.2519 0.6329 0.212 Uiso 1 1 calc R . .
H16B H 0.5672 1.2346 0.7140 0.212 Uiso 1 1 calc R . .
H16C H 0.4610 1.2452 0.6495 0.212 Uiso 1 1 calc R . .
O20 O 0.9893(7) 0.7210(6) 0.7724(4) 0.0372(18) Uani 1 1 d . . .
C21 C 0.9919(12) 0.7455(10) 0.9614(7) 0.046(3) Uani 1 1 d . . .
C22 C 0.9328(17) 0.7300(13) 1.0260(9) 0.066(4) Uani 1 1 d . . .
H22 H 0.8729 0.7664 1.0402 0.080 Uiso 1 1 calc R . .
C23 C 0.9675(18) 0.6597(10) 1.0662(8) 0.064(5) Uani 1 1 d . . .
H23 H 0.9330 0.6487 1.1097 0.077 Uiso 1 1 calc R . .
C24 C 1.0561(19) 0.6033(12) 1.0420(9) 0.069(5) Uani 1 1 d . . .
H24 H 1.0770 0.5540 1.0684 0.083 Uiso 1 1 calc R . .
C25 C 1.1104(15) 0.6210(11) 0.9805(9) 0.061(4) Uani 1 1 d . . .
C26 C 1.2130(18) 0.5716(14) 0.9510(13) 0.084(6) Uani 1 1 d . . .
H26A H 1.2352 0.5250 0.9832 0.125 Uiso 1 1 calc R . .
H26B H 1.2827 0.6140 0.9505 0.125 Uiso 1 1 calc R . .
H26C H 1.1859 0.5445 0.9007 0.125 Uiso 1 1 calc R . .
C91 C 0.415(5) 0.323(4) 0.885(3) 0.09(2) Uiso 0.25 1 d PG . .
C92 C 0.335(6) 0.282(3) 0.824(3) 0.09(2) Uiso 0.25 1 d PG . .
H92 H 0.3053 0.2213 0.8232 0.112 Uiso 0.25 1 calc PR . .
C93 C 0.298(5) 0.332(4) 0.764(3) 0.14(4) Uiso 0.25 1 d PG . .
H93 H 0.2442 0.3042 0.7227 0.163 Uiso 0.25 1 calc PR . .
C94 C 0.342(5) 0.422(4) 0.764(3) 0.08(2) Uiso 0.25 1 d PG . .
H94 H 0.3177 0.4552 0.7242 0.100 Uiso 0.25 1 calc PR . .
C95 C 0.423(5) 0.463(3) 0.826(3) 0.10(3) Uiso 0.25 1 d PG . .
H95 H 0.4522 0.5233 0.8261 0.125 Uiso 0.25 1 calc PR . .
C96 C 0.459(5) 0.413(4) 0.886(3) 0.09(2) Uiso 0.25 1 d PG . .
H96 H 0.5133 0.4403 0.9266 0.103 Uiso 0.25 1 calc PR . .
C97 C 0.442(7) 0.287(6) 0.952(4) 0.08(2) Uiso 0.25 1 d P . .
H97A H 0.5193 0.3144 0.9769 0.119 Uiso 0.25 1 calc PR . .
H97B H 0.4454 0.2227 0.9436 0.119 Uiso 0.25 1 calc PR . .
H97C H 0.3792 0.2996 0.9833 0.119 Uiso 0.25 1 calc PR . .
C101 C 0.9724(16) 0.5128(10) 0.7630(9) 0.057(4) Uani 1 1 d . . .
C102 C 0.7474(14) 0.5153(10) 0.7055(9) 0.055(4) Uani 1 1 d . . .
C200 C 1.0612(14) 1.0315(10) 0.6686(8) 0.050(3) Uani 1 1 d . . .
C201 C 0.8725(13) 0.8141(9) 0.5740(8) 0.048(3) Uani 1 1 d . . .
C202 C 1.1005(13) 0.7928(9) 0.6324(8) 0.046(3) Uani 1 1 d . . .
C301 C 0.8362(13) 0.4870(12) 0.5535(8) 0.052(4) Uani 1 1 d . . .
C302 C 0.9142(13) 0.6411(12) 0.4819(9) 0.055(4) Uani 1 1 d . . .
C303 C 1.0517(14) 0.5890(12) 0.6145(8) 0.057(4) Uani 1 1 d . . .
C401 C 1.1548(15) 0.9924(11) 0.8453(9) 0.058(4) Uani 1 1 d . . .
C402 C 1.2710(14) 0.9135(12) 0.7446(9) 0.058(4) Uani 1 1 d . . .
C801 C 0.6889(14) 0.8178(10) 0.8498(8) 0.051(3) Uani 1 1 d . . .
C501 C 1.2568(14) 0.8365(11) 0.9249(8) 0.056(4) Uani 1 1 d . . .
C502 C 1.2553(14) 0.7246(11) 0.8087(9) 0.057(4) Uani 1 1 d . . .
C601 C 0.8705(13) 1.0254(11) 0.5791(10) 0.057(4) Uani 1 1 d . . .
C701 C 0.6332(15) 1.0165(11) 0.8312(9) 0.057(4) Uani 1 1 d . . .
C702 C 0.8543(13) 1.0163(9) 0.8971(9) 0.049(3) Uani 1 1 d . . .
C802 C 0.7762(14) 0.6711(10) 0.8568(7) 0.050(3) Uani 1 1 d . . .
C901 C 0.7370(19) 1.2034(15) 0.8033(14) 0.087(6) Uani 1 1 d . . .
C902 C 0.834(2) 1.207(2) 0.6632(19) 0.120(9) Uani 1 1 d . . .
C903 C 0.9619(18) 1.1509(11) 0.7838(11) 0.068(5) Uani 1 1 d . . .
N1 N 0.7813(9) 0.7209(7) 0.7007(5) 0.036(2) Uani 1 1 d . . .
N2 N 0.6974(9) 0.6548(7) 0.5807(6) 0.041(2) Uani 1 1 d . . .
N3 N 0.7135(9) 0.9310(8) 0.6833(6) 0.041(2) Uani 1 1 d . . .
H3 H 0.6983 0.8698 0.6730 0.050 Uiso 1 1 d R . .
N4 N 0.6275(12) 1.0703(9) 0.6667(8) 0.061(3) Uani 1 1 d . . .
N5 N 0.9701(10) 0.8131(8) 0.9103(6) 0.047(3) Uani 1 1 d . . .
H5 H 0.9707 0.8713 0.9310 0.056 Uiso 1 1 d R . .
N6 N 1.0771(10) 0.6920(7) 0.9376(6) 0.044(3) Uani 1 1 d . . .
O101 O 1.0299(15) 0.4536(10) 0.7755(9) 0.096(5) Uani 1 1 d . . .
O102 O 0.6677(14) 0.4576(10) 0.6897(8) 0.088(4) Uani 1 1 d . . .
O200 O 1.1405(10) 1.0812(8) 0.6575(7) 0.071(3) Uani 1 1 d . . .
O201 O 0.8330(11) 0.8302(8) 0.5134(6) 0.066(3) Uani 1 1 d . . .
O202 O 1.1865(9) 0.7897(7) 0.6016(6) 0.058(3) Uani 1 1 d . . .
O301 O 0.8094(10) 0.4132(8) 0.5360(7) 0.069(3) Uani 1 1 d . . .
O302 O 0.9314(12) 0.6544(10) 0.4243(7) 0.082(4) Uani 1 1 d . . .
O303 O 1.1506(10) 0.5713(8) 0.6324(7) 0.066(3) Uani 1 1 d . . .
O401 O 1.1842(14) 1.0378(9) 0.8997(8) 0.089(4) Uani 1 1 d . . .
O402 O 1.3705(10) 0.9130(12) 0.7369(7) 0.089(4) Uani 1 1 d . . .
O801 O 0.5974(11) 0.8191(9) 0.8718(9) 0.084(4) Uani 1 1 d . . .
O501 O 1.3326(12) 0.8728(11) 0.9695(8) 0.096(4) Uani 1 1 d . . .
O502 O 1.3284(12) 0.6931(11) 0.7775(9) 0.093(4) Uani 1 1 d . . .
O601 O 0.8608(13) 1.0539(11) 0.5209(8) 0.094(5) Uani 1 1 d . . .
O701 O 0.5470(11) 1.0444(9) 0.8487(8) 0.081(4) Uani 1 1 d . . .
O702 O 0.9042(13) 1.0510(9) 0.9531(6) 0.078(3) Uani 1 1 d . . .
O802 O 0.7347(12) 0.6137(8) 0.8880(7) 0.073(3) Uani 1 1 d . . .
O901 O 0.7133(18) 1.2541(14) 0.8501(14) 0.143(8) Uani 1 1 d . . .
O902 O 0.853(2) 1.261(2) 0.623(2) 0.218(17) Uani 1 1 d . . .
O903 O 1.0579(14) 1.1713(10) 0.8126(9) 0.093(4) Uani 1 1 d . . .
Ru1 Ru 0.87334(9) 0.60518(7) 0.73327(6) 0.0389(3) Uani 1 1 d . . .
Ru2 Ru 0.94325(8) 0.77813(7) 0.66651(5) 0.0325(3) Uani 1 1 d . . .
Ru3 Ru 0.88826(9) 0.61335(7) 0.58480(6) 0.0372(3) Uani 1 1 d . . .
Ru4 Ru 1.10434(9) 0.91054(7) 0.76049(6) 0.0398(3) Uani 1 1 d . . .
Ru5 Ru 1.13289(9) 0.77875(7) 0.85542(6) 0.0404(3) Uani 1 1 d . . .
Ru6 Ru 0.89871(9) 0.97426(7) 0.67102(6) 0.0374(3) Uani 1 1 d . . .
Ru7 Ru 0.77544(9) 0.96702(7) 0.80293(6) 0.0387(3) Uani 1 1 d . . .
Ru8 Ru 0.83436(9) 0.77207(7) 0.81363(5) 0.0349(3) Uani 1 1 d . . .
Ru9 Ru 0.80239(12) 1.12325(8) 0.73387(8) 0.0558(3) Uani 1 1 d . . .
 
loop_
 _atom_site_aniso_label
 _atom_site_aniso_U_11
 _atom_site_aniso_U_22
 _atom_site_aniso_U_33
 _atom_site_aniso_U_23
 _atom_site_aniso_U_13
 _atom_site_aniso_U_12
C1 0.018(6) 0.047(7) 0.043(7) 0.003(6) -0.003(5) 0.004(5)
C2 0.035(7) 0.066(10) 0.066(10) -0.010(8) -0.001(7) 0.005(7)
C3 0.025(7) 0.062(9) 0.090(12) -0.018(9) -0.004(7) 0.003(6)
C4 0.044(9) 0.060(10) 0.080(12) -0.003(8) -0.020(8) -0.005(7)
C5 0.037(8) 0.056(9) 0.061(9) -0.001(7) -0.018(6) -0.007(6)
C6 0.055(9) 0.060(9) 0.053(9) -0.006(7) -0.015(7) 0.006(7)
O10 0.031(4) 0.052(5) 0.027(4) 0.001(4) 0.008(3) 0.005(4)
C11 0.023(6) 0.072(10) 0.063(9) 0.040(8) 0.015(6) 0.017(6)
C12 0.048(9) 0.096(13) 0.059(10) 0.032(9) 0.005(8) 0.022(9)
C13 0.048(10) 0.17(3) 0.075(13) 0.055(15) -0.015(9) 0.016(13)
C14 0.064(13) 0.17(3) 0.096(16) 0.082(17) 0.025(12) 0.059(15)
C15 0.053(11) 0.120(17) 0.082(12) 0.033(11) 0.019(10) 0.041(11)
C16 0.14(2) 0.11(2) 0.18(3) 0.05(2) 0.00(2) 0.089(19)
O20 0.032(4) 0.049(5) 0.031(4) 0.003(4) 0.002(3) 0.009(4)
C21 0.046(8) 0.052(8) 0.039(7) 0.004(6) -0.003(6) 0.006(6)
C22 0.078(11) 0.079(11) 0.042(8) 0.005(8) 0.012(8) -0.001(9)
C23 0.113(14) 0.048(9) 0.032(7) 0.015(6) 0.009(8) -0.011(9)
C24 0.103(14) 0.059(10) 0.040(8) 0.014(7) -0.010(9) -0.008(9)
C25 0.067(10) 0.050(9) 0.060(10) -0.006(7) -0.009(8) -0.001(7)
C26 0.070(11) 0.074(12) 0.109(15) 0.027(11) -0.007(10) 0.036(10)
C101 0.080(11) 0.041(8) 0.049(8) 0.002(6) 0.002(7) 0.011(8)
C102 0.051(9) 0.044(8) 0.071(10) 0.006(7) 0.015(7) 0.004(7)
C200 0.052(9) 0.049(8) 0.048(8) 0.013(6) 0.001(6) 0.004(7)
C201 0.058(8) 0.044(7) 0.041(8) -0.020(6) 0.002(6) 0.021(6)
C202 0.043(8) 0.040(7) 0.054(8) 0.008(6) 0.001(7) -0.006(6)
C301 0.041(8) 0.066(11) 0.049(8) 0.005(7) -0.001(6) 0.008(7)
C302 0.038(8) 0.080(11) 0.047(9) 0.012(7) 0.009(6) 0.001(7)
C303 0.045(9) 0.081(11) 0.042(8) -0.016(7) 0.013(7) -0.011(8)
C401 0.063(10) 0.053(9) 0.054(9) -0.009(8) 0.008(7) -0.008(7)
C402 0.039(9) 0.077(11) 0.051(9) 0.007(7) -0.007(6) -0.013(7)
C801 0.048(9) 0.055(9) 0.049(8) -0.004(6) 0.011(7) -0.007(7)
C501 0.044(8) 0.073(10) 0.048(8) -0.005(7) -0.010(7) 0.021(7)
C502 0.048(9) 0.057(9) 0.061(9) 0.019(7) -0.015(8) -0.001(7)
C601 0.040(8) 0.063(9) 0.070(11) 0.017(8) 0.012(7) 0.000(7)
C701 0.050(9) 0.063(9) 0.054(9) -0.006(7) -0.004(7) 0.008(7)
C702 0.049(8) 0.044(8) 0.055(9) 0.003(7) 0.003(7) 0.019(6)
C802 0.066(9) 0.053(8) 0.032(7) 0.004(6) 0.017(6) 0.003(7)
C901 0.081(13) 0.079(13) 0.113(16) 0.001(12) 0.055(12) 0.020(10)
C902 0.084(16) 0.12(2) 0.17(3) 0.06(2) 0.026(16) 0.019(14)
C903 0.072(12) 0.053(9) 0.076(11) -0.028(8) 0.016(9) 0.004(8)
N1 0.037(6) 0.048(6) 0.021(5) -0.004(4) 0.001(4) -0.005(5)
N2 0.030(5) 0.043(6) 0.045(6) -0.004(5) -0.001(5) -0.001(4)
N3 0.026(5) 0.057(7) 0.041(6) 0.002(5) 0.001(4) 0.008(5)
N4 0.066(8) 0.056(8) 0.065(8) 0.022(6) 0.002(6) 0.026(6)
N5 0.049(6) 0.046(6) 0.044(6) 0.004(5) -0.004(5) 0.009(5)
N6 0.055(7) 0.029(5) 0.045(6) -0.003(5) 0.000(5) 0.001(5)
O101 0.120(11) 0.077(9) 0.105(11) 0.052(8) 0.022(9) 0.048(8)
O102 0.093(9) 0.078(9) 0.086(9) 0.001(7) 0.006(7) -0.029(8)
O200 0.045(6) 0.073(7) 0.101(9) 0.031(7) 0.019(6) -0.004(6)
O201 0.084(8) 0.078(8) 0.033(6) 0.013(5) -0.017(5) 0.017(6)
O202 0.032(5) 0.068(7) 0.075(7) 0.003(5) 0.018(5) 0.004(4)
O301 0.061(7) 0.046(7) 0.094(9) -0.004(6) -0.004(6) -0.001(5)
O302 0.079(8) 0.119(11) 0.054(7) 0.022(7) 0.024(6) 0.016(7)
O303 0.045(6) 0.074(7) 0.077(8) 0.002(6) -0.004(5) 0.017(5)
O401 0.113(11) 0.062(7) 0.076(9) -0.009(7) -0.034(8) 0.001(7)
O402 0.030(6) 0.155(13) 0.078(8) 0.016(8) 0.007(5) -0.014(7)
O801 0.056(7) 0.084(9) 0.127(11) 0.013(8) 0.056(8) 0.020(6)
O501 0.068(8) 0.112(11) 0.091(10) -0.016(8) -0.039(8) -0.009(7)
O502 0.059(8) 0.116(11) 0.112(11) -0.001(9) 0.030(8) 0.027(8)
O601 0.081(9) 0.121(12) 0.085(9) 0.066(9) -0.004(7) -0.003(8)
O701 0.055(7) 0.090(9) 0.098(9) -0.019(7) 0.015(6) 0.033(6)
O702 0.099(9) 0.083(8) 0.043(6) -0.015(6) -0.010(6) 0.001(7)
O802 0.094(9) 0.061(7) 0.061(7) 0.008(6) 0.016(6) -0.027(6)
O901 0.104(13) 0.130(15) 0.19(2) -0.051(15) 0.051(13) 0.021(11)
O902 0.17(2) 0.19(2) 0.35(4) 0.22(3) 0.10(2) 0.050(18)
O903 0.078(9) 0.082(9) 0.106(11) -0.026(8) -0.006(8) -0.008(7)
Ru1 0.0390(6) 0.0382(6) 0.0381(6) 0.0024(4) 0.0008(4) 0.0026(4)
Ru2 0.0254(5) 0.0388(5) 0.0318(5) 0.0017(4) -0.0007(4) 0.0019(4)
Ru3 0.0311(5) 0.0418(6) 0.0364(6) -0.0025(4) -0.0019(4) 0.0044(4)
Ru4 0.0315(5) 0.0453(6) 0.0396(6) 0.0045(4) -0.0034(4) -0.0049(4)
Ru5 0.0346(5) 0.0472(6) 0.0367(6) 0.0043(4) -0.0055(4) 0.0011(4)
Ru6 0.0317(5) 0.0414(6) 0.0388(6) 0.0065(4) 0.0017(4) 0.0034(4)
Ru7 0.0374(6) 0.0388(6) 0.0391(6) 0.0000(4) 0.0019(4) 0.0060(4)
Ru8 0.0325(5) 0.0377(5) 0.0338(5) 0.0003(4) 0.0032(4) 0.0017(4)
Ru9 0.0571(7) 0.0377(6) 0.0756(9) 0.0094(6) 0.0131(6) 0.0119(5)
 
_geom_special_details
;
 All esds (except the esd in the dihedral angle between two l.s. planes)
 are estimated using the full covariance matrix.  The cell esds are taken
 into account individually in the estimation of esds in distances, angles
 and torsion angles; correlations between esds in cell parameters are only
 used when they are defined by crystal symmetry.  An approximate (isotropic)
 treatment of cell esds is used for estimating esds involving l.s. planes.
;
 
loop_
 _geom_bond_atom_site_label_1
 _geom_bond_atom_site_label_2
 _geom_bond_distance
 _geom_bond_site_symmetry_2
 _geom_bond_publ_flag
C1 N2 1.380(17) . ?
C1 N1 1.395(15) . ?
C1 C2 1.409(19) . ?
C2 C3 1.42(2) . ?
C2 H2 0.9300 . ?
C3 C4 1.38(2) . ?
C3 H3A 0.9300 . ?
C4 C5 1.37(2) . ?
C4 H4 0.9300 . ?
C5 N2 1.387(17) . ?
C5 C6 1.49(2) . ?
C6 H6A 0.9600 . ?
C6 H6B 0.9600 . ?
C6 H6C 0.9600 . ?
O10 Ru4 2.072(8) . ?
O10 Ru7 2.140(8) . ?
O10 Ru6 2.168(8) . ?
O10 Ru8 2.220(8) . ?
O10 Ru2 2.399(8) . ?
C11 C12 1.35(2) . ?
C11 N4 1.36(2) . ?
C11 N3 1.446(16) . ?
C12 C13 1.39(3) . ?
C12 H12 0.9300 . ?
C13 C14 1.43(4) . ?
C13 H13 0.9300 . ?
C14 C15 1.35(4) . ?
C14 H14 0.9300 . ?
C15 N4 1.40(2) . ?
C15 C16 1.54(4) . ?
C16 H16A 0.9600 . ?
C16 H16B 0.9600 . ?
C16 H16C 0.9600 . ?
O20 Ru1 2.084(9) . ?
O20 Ru8 2.111(8) . ?
O20 Ru5 2.117(8) . ?
O20 Ru2 2.159(8) . ?
C21 N6 1.359(18) . ?
C21 N5 1.423(18) . ?
C21 C22 1.43(2) . ?
C22 C23 1.36(2) . ?
C22 H22 0.9300 . ?
C23 C24 1.42(3) . ?
C23 H23 0.9300 . ?
C24 C25 1.35(2) . ?
C24 H24 0.9300 . ?
C25 N6 1.40(2) . ?
C25 C26 1.52(3) . ?
C26 H26A 0.9600 . ?
C26 H26B 0.9600 . ?
C26 H26C 0.9600 . ?
C91 C97 1.36(8) . ?
C91 C92 1.3900 . ?
C91 C96 1.3900 . ?
C92 C93 1.3900 . ?
C92 H92 0.9300 . ?
C93 C94 1.3900 . ?
C93 H93 0.9300 . ?
C94 C95 1.3900 . ?
C94 H94 0.9300 . ?
C95 C96 1.3900 . ?
C95 H95 0.9300 . ?
C96 H96 0.9300 . ?
C97 H97A 0.9600 . ?
C97 H97B 0.9600 . ?
C97 H97C 0.9600 . ?
C101 O101 1.140(19) . ?
C101 Ru1 1.881(16) . ?
C102 O102 1.173(19) . ?
C102 Ru1 1.847(16) . ?
C200 O200 1.151(17) . ?
C200 Ru6 1.936(15) . ?
C200 Ru4 2.558(14) . ?
C201 O201 1.168(17) . ?
C201 Ru2 1.878(15) . ?
C202 O202 1.158(17) . ?
C202 Ru2 1.916(15) . ?
C301 O301 1.120(18) . ?
C301 Ru3 1.936(18) . ?
C302 O302 1.104(18) . ?
C302 Ru3 1.972(16) . ?
C303 O303 1.154(19) . ?
C303 Ru3 1.887(17) . ?
C401 O401 1.137(19) . ?
C401 Ru4 1.868(16) . ?
C402 O402 1.125(18) . ?
C402 Ru4 1.896(16) . ?
C801 O801 1.132(17) . ?
C801 Ru8 1.950(15) . ?
C801 Ru7 2.587(15) . ?
C501 O501 1.154(19) . ?
C501 Ru5 1.843(15) . ?
C502 O502 1.14(2) . ?
C502 Ru5 1.872(19) . ?
C601 O601 1.153(19) . ?
C601 Ru6 1.869(17) . ?
C701 O701 1.134(19) . ?
C701 Ru7 1.889(16) . ?
C702 O702 1.147(18) . ?
C702 Ru7 1.869(16) . ?
C802 O802 1.153(17) . ?
C802 Ru8 1.849(14) . ?
C901 O901 1.15(3) . ?
C901 Ru9 1.89(2) . ?
C902 O902 1.15(3) . ?
C902 Ru9 1.89(3) . ?
C903 O903 1.13(2) . ?
C903 Ru9 1.88(2) . ?
N1 Ru8 2.101(9) . ?
N1 Ru2 2.105(10) . ?
N1 Ru1 2.139(11) . ?
N2 Ru3 2.233(10) . ?
N3 Ru6 2.143(10) . ?
N3 Ru7 2.181(11) . ?
N3 H3 0.9100 . ?
N4 Ru9 2.203(14) . ?
N5 Ru8 2.164(11) . ?
N5 Ru5 2.225(12) . ?
N5 H5 0.9100 . ?
N6 Ru5 2.148(11) . ?
Ru1 Ru3 2.6992(19) . ?
Ru1 Ru8 2.8468(18) . ?
Ru1 Ru2 3.0036(18) . ?
Ru2 Ru3 2.7318(17) . ?
Ru2 Ru4 2.8425(16) . ?
Ru2 Ru6 2.9761(19) . ?
Ru2 Ru8 3.0370(18) . ?
Ru4 Ru5 2.7000(17) . ?
Ru4 Ru6 2.8760(17) . ?
Ru6 Ru9 2.7394(18) . ?
Ru6 Ru7 2.8772(18) . ?
Ru7 Ru9 2.7244(19) . ?
Ru7 Ru8 3.0196(19) . ?
 
loop_
 _geom_angle_atom_site_label_1
 _geom_angle_atom_site_label_2
 _geom_angle_atom_site_label_3
 _geom_angle
 _geom_angle_site_symmetry_1
 _geom_angle_site_symmetry_3
 _geom_angle_publ_flag
N2 C1 N1 115.2(10) . . ?
N2 C1 C2 122.1(11) . . ?
N1 C1 C2 122.7(12) . . ?
C1 C2 C3 115.7(14) . . ?
C1 C2 H2 122.2 . . ?
C3 C2 H2 122.2 . . ?
C4 C3 C2 122.5(14) . . ?
C4 C3 H3A 118.8 . . ?
C2 C3 H3A 118.8 . . ?
C5 C4 C3 119.5(14) . . ?
C5 C4 H4 120.3 . . ?
C3 C4 H4 120.3 . . ?
C4 C5 N2 120.6(14) . . ?
C4 C5 C6 120.6(13) . . ?
N2 C5 C6 118.6(13) . . ?
C5 C6 H6A 109.5 . . ?
C5 C6 H6B 109.5 . . ?
H6A C6 H6B 109.5 . . ?
C5 C6 H6C 109.5 . . ?
H6A C6 H6C 109.5 . . ?
H6B C6 H6C 109.5 . . ?
Ru4 O10 Ru7 138.4(4) . . ?
Ru4 O10 Ru6 85.4(3) . . ?
Ru7 O10 Ru6 83.8(3) . . ?
Ru4 O10 Ru8 122.4(4) . . ?
Ru7 O10 Ru8 87.6(3) . . ?
Ru6 O10 Ru8 143.6(4) . . ?
Ru4 O10 Ru2 78.6(2) . . ?
Ru7 O10 Ru2 138.4(4) . . ?
Ru6 O10 Ru2 81.2(2) . . ?
Ru8 O10 Ru2 82.1(3) . . ?
C12 C11 N4 124.7(13) . . ?
C12 C11 N3 120.7(14) . . ?
N4 C11 N3 114.4(13) . . ?
C11 C12 C13 120(2) . . ?
C11 C12 H12 120.2 . . ?
C13 C12 H12 120.2 . . ?
C12 C13 C14 117(2) . . ?
C12 C13 H13 121.5 . . ?
C14 C13 H13 121.5 . . ?
C15 C14 C13 121.2(17) . . ?
C15 C14 H14 119.4 . . ?
C13 C14 H14 119.4 . . ?
C14 C15 N4 121(2) . . ?
C14 C15 C16 121(2) . . ?
N4 C15 C16 118(2) . . ?
C15 C16 H16A 109.5 . . ?
C15 C16 H16B 109.5 . . ?
H16A C16 H16B 109.5 . . ?
C15 C16 H16C 109.5 . . ?
H16A C16 H16C 109.5 . . ?
H16B C16 H16C 109.5 . . ?
Ru1 O20 Ru8 85.5(3) . . ?
Ru1 O20 Ru5 145.7(4) . . ?
Ru8 O20 Ru5 101.9(3) . . ?
Ru1 O20 Ru2 90.1(3) . . ?
Ru8 O20 Ru2 90.7(3) . . ?
Ru5 O20 Ru2 122.8(4) . . ?
N6 C21 N5 109.3(11) . . ?
N6 C21 C22 122.9(13) . . ?
N5 C21 C22 127.7(13) . . ?
C23 C22 C21 117.5(16) . . ?
C23 C22 H22 121.3 . . ?
C21 C22 H22 121.3 . . ?
C22 C23 C24 120.1(15) . . ?
C22 C23 H23 119.9 . . ?
C24 C23 H23 119.9 . . ?
C25 C24 C23 120.4(15) . . ?
C25 C24 H24 119.8 . . ?
C23 C24 H24 119.8 . . ?
C24 C25 N6 121.2(16) . . ?
C24 C25 C26 126.6(16) . . ?
N6 C25 C26 112.2(15) . . ?
C25 C26 H26A 109.5 . . ?
C25 C26 H26B 109.5 . . ?
H26A C26 H26B 109.5 . . ?
C25 C26 H26C 109.5 . . ?
H26A C26 H26C 109.5 . . ?
H26B C26 H26C 109.5 . . ?
C97 C91 C92 126(5) . . ?
C97 C91 C96 113(5) . . ?
C92 C91 C96 120.0 . . ?
C91 C92 C93 120.0 . . ?
C91 C92 H92 120.0 . . ?
C93 C92 H92 120.0 . . ?
C94 C93 C92 120.0 . . ?
C94 C93 H93 120.0 . . ?
C92 C93 H93 120.0 . . ?
C93 C94 C95 120.0 . . ?
C93 C94 H94 120.0 . . ?
C95 C94 H94 120.0 . . ?
C96 C95 C94 120.0 . . ?
C96 C95 H95 120.0 . . ?
C94 C95 H95 120.0 . . ?
C95 C96 C91 120.0 . . ?
C95 C96 H96 120.0 . . ?
C91 C96 H96 120.0 . . ?
C91 C97 H97A 109.5 . . ?
C91 C97 H97B 109.5 . . ?
H97A C97 H97B 109.5 . . ?
C91 C97 H97C 109.5 . . ?
H97A C97 H97C 109.5 . . ?
H97B C97 H97C 109.5 . . ?
O101 C101 Ru1 174.7(15) . . ?
O102 C102 Ru1 178.3(15) . . ?
O200 C200 Ru6 162.3(12) . . ?
O200 C200 Ru4 119.2(11) . . ?
Ru6 C200 Ru4 78.2(5) . . ?
O201 C201 Ru2 174.1(11) . . ?
O202 C202 Ru2 167.7(12) . . ?
O301 C301 Ru3 178.0(13) . . ?
O302 C302 Ru3 177.6(15) . . ?
O303 C303 Ru3 177.9(15) . . ?
O401 C401 Ru4 175.6(15) . . ?
O402 C402 Ru4 177.6(15) . . ?
O801 C801 Ru8 160.7(13) . . ?
O801 C801 Ru7 116.8(12) . . ?
Ru8 C801 Ru7 82.1(5) . . ?
O501 C501 Ru5 178.4(15) . . ?
O502 C502 Ru5 177.3(14) . . ?
O601 C601 Ru6 174.9(15) . . ?
O701 C701 Ru7 178.5(16) . . ?
O702 C702 Ru7 176.1(13) . . ?
O802 C802 Ru8 173.5(13) . . ?
O901 C901 Ru9 171(2) . . ?
O902 C902 Ru9 177(3) . . ?
O903 C903 Ru9 176.8(18) . . ?
C1 N1 Ru8 140.9(8) . . ?
C1 N1 Ru2 121.9(8) . . ?
Ru8 N1 Ru2 92.4(4) . . ?
C1 N1 Ru1 111.3(8) . . ?
Ru8 N1 Ru1 84.3(4) . . ?
Ru2 N1 Ru1 90.1(4) . . ?
C1 N2 C5 119.6(11) . . ?
C1 N2 Ru3 111.4(7) . . ?
C5 N2 Ru3 127.9(9) . . ?
C11 N3 Ru6 118.0(8) . . ?
C11 N3 Ru7 118.4(9) . . ?
Ru6 N3 Ru7 83.4(4) . . ?
C11 N3 H3 111.7 . . ?
Ru6 N3 H3 111.2 . . ?
Ru7 N3 H3 111.3 . . ?
C11 N4 C15 116.8(16) . . ?
C11 N4 Ru9 115.0(9) . . ?
C15 N4 Ru9 128.2(13) . . ?
C21 N5 Ru8 115.2(9) . . ?
C21 N5 Ru5 90.7(8) . . ?
Ru8 N5 Ru5 96.8(5) . . ?
C21 N5 H5 116.6 . . ?
Ru8 N5 H5 116.4 . . ?
Ru5 N5 H5 116.5 . . ?
C21 N6 C25 117.9(12) . . ?
C21 N6 Ru5 95.8(8) . . ?
C25 N6 Ru5 144.4(11) . . ?
C102 Ru1 C101 87.4(7) . . ?
C102 Ru1 O20 168.9(5) . . ?
C101 Ru1 O20 101.1(5) . . ?
C102 Ru1 N1 99.6(5) . . ?
C101 Ru1 N1 172.9(6) . . ?
O20 Ru1 N1 72.3(3) . . ?
C102 Ru1 Ru3 87.3(5) . . ?
C101 Ru1 Ru3 105.3(5) . . ?
O20 Ru1 Ru3 97.3(2) . . ?
N1 Ru1 Ru3 73.6(2) . . ?
C102 Ru1 Ru8 121.2(5) . . ?
C101 Ru1 Ru8 129.9(5) . . ?
O20 Ru1 Ru8 47.7(2) . . ?
N1 Ru1 Ru8 47.3(2) . . ?
Ru3 Ru1 Ru8 115.38(5) . . ?
C102 Ru1 Ru2 132.4(5) . . ?
C101 Ru1 Ru2 128.9(5) . . ?
O20 Ru1 Ru2 46.0(2) . . ?
N1 Ru1 Ru2 44.5(3) . . ?
Ru3 Ru1 Ru2 56.94(4) . . ?
Ru8 Ru1 Ru2 62.48(5) . . ?
C201 Ru2 C202 88.9(6) . . ?
C201 Ru2 N1 97.2(5) . . ?
C202 Ru2 N1 162.8(5) . . ?
C201 Ru2 O20 168.3(5) . . ?
C202 Ru2 O20 101.3(5) . . ?
N1 Ru2 O20 71.5(3) . . ?
C201 Ru2 O10 109.0(4) . . ?
C202 Ru2 O10 112.6(5) . . ?
N1 Ru2 O10 80.7(3) . . ?
O20 Ru2 O10 72.6(3) . . ?
C201 Ru2 Ru3 79.1(4) . . ?
C202 Ru2 Ru3 92.2(4) . . ?
N1 Ru2 Ru3 73.4(3) . . ?
O20 Ru2 Ru3 94.6(2) . . ?
O10 Ru2 Ru3 153.7(2) . . ?
C201 Ru2 Ru4 116.5(4) . . ?
C202 Ru2 Ru4 67.8(4) . . ?
N1 Ru2 Ru4 122.3(3) . . ?
O20 Ru2 Ru4 73.2(2) . . ?
O10 Ru2 Ru4 45.60(19) . . ?
Ru3 Ru2 Ru4 153.16(5) . . ?
C201 Ru2 Ru6 66.1(4) . . ?
C202 Ru2 Ru6 95.5(4) . . ?
N1 Ru2 Ru6 101.7(3) . . ?
O20 Ru2 Ru6 118.0(2) . . ?
O10 Ru2 Ru6 46.0(2) . . ?
Ru3 Ru2 Ru6 144.16(5) . . ?
Ru4 Ru2 Ru6 59.19(4) . . ?
C201 Ru2 Ru1 125.7(5) . . ?
C202 Ru2 Ru1 118.7(4) . . ?
N1 Ru2 Ru1 45.4(3) . . ?
O20 Ru2 Ru1 43.9(2) . . ?
O10 Ru2 Ru1 102.0(2) . . ?
Ru3 Ru2 Ru1 55.91(5) . . ?
Ru4 Ru2 Ru1 117.09(5) . . ?
Ru6 Ru2 Ru1 142.25(5) . . ?
C201 Ru2 Ru8 128.6(4) . . ?
C202 Ru2 Ru8 139.2(4) . . ?
N1 Ru2 Ru8 43.7(2) . . ?
O20 Ru2 Ru8 44.0(2) . . ?
O10 Ru2 Ru8 46.4(2) . . ?
Ru3 Ru2 Ru8 108.59(5) . . ?
Ru4 Ru2 Ru8 79.47(5) . . ?
Ru6 Ru2 Ru8 87.76(4) . . ?
Ru1 Ru2 Ru8 56.23(3) . . ?
C303 Ru3 C301 93.3(6) . . ?
C303 Ru3 C302 95.2(6) . . ?
C301 Ru3 C302 93.2(7) . . ?
C303 Ru3 N2 165.4(5) . . ?
C301 Ru3 N2 93.8(5) . . ?
C302 Ru3 N2 97.2(5) . . ?
C303 Ru3 Ru1 82.4(4) . . ?
C301 Ru3 Ru1 96.9(4) . . ?
C302 Ru3 Ru1 169.7(5) . . ?
N2 Ru3 Ru1 84.0(3) . . ?
C303 Ru3 Ru2 87.0(5) . . ?
C301 Ru3 Ru2 163.9(4) . . ?
C302 Ru3 Ru2 102.8(5) . . ?
N2 Ru3 Ru2 82.7(3) . . ?
Ru1 Ru3 Ru2 67.15(4) . . ?
C401 Ru4 C402 87.1(7) . . ?
C401 Ru4 O10 101.3(5) . . ?
C402 Ru4 O10 171.5(5) . . ?
C401 Ru4 C200 95.8(6) . . ?
C402 Ru4 C200 91.9(6) . . ?
O10 Ru4 C200 88.7(4) . . ?
C401 Ru4 Ru5 86.1(5) . . ?
C402 Ru4 Ru5 91.8(5) . . ?
O10 Ru4 Ru5 87.4(2) . . ?
C200 Ru4 Ru5 175.9(3) . . ?
C401 Ru4 Ru2 155.8(5) . . ?
C402 Ru4 Ru2 115.7(5) . . ?
O10 Ru4 Ru2 55.8(2) . . ?
C200 Ru4 Ru2 91.6(3) . . ?
Ru5 Ru4 Ru2 85.25(5) . . ?
C401 Ru4 Ru6 109.8(5) . . ?
C402 Ru4 Ru6 129.8(5) . . ?
O10 Ru4 Ru6 48.7(2) . . ?
C200 Ru4 Ru6 41.2(3) . . ?
Ru5 Ru4 Ru6 134.72(5) . . ?
Ru2 Ru4 Ru6 62.72(4) . . ?
C501 Ru5 C502 86.8(6) . . ?
C501 Ru5 O20 176.1(6) . . ?
C502 Ru5 O20 94.2(5) . . ?
C501 Ru5 N6 91.0(6) . . ?
C502 Ru5 N6 108.2(5) . . ?
O20 Ru5 N6 92.2(4) . . ?
C501 Ru5 N5 100.5(6) . . ?
C502 Ru5 N5 167.9(6) . . ?
O20 Ru5 N5 79.1(4) . . ?
N6 Ru5 N5 62.5(4) . . ?
C501 Ru5 Ru4 99.2(5) . . ?
C502 Ru5 Ru4 95.6(4) . . ?
O20 Ru5 Ru4 77.0(2) . . ?
N6 Ru5 Ru4 154.6(3) . . ?
N5 Ru5 Ru4 92.6(3) . . ?
C601 Ru6 C200 81.2(6) . . ?
C601 Ru6 N3 98.9(5) . . ?
C200 Ru6 N3 170.8(5) . . ?
C601 Ru6 O10 169.3(6) . . ?
C200 Ru6 O10 104.9(5) . . ?
N3 Ru6 O10 76.5(3) . . ?
C601 Ru6 Ru9 86.7(5) . . ?
C200 Ru6 Ru9 96.9(4) . . ?
N3 Ru6 Ru9 74.0(3) . . ?
O10 Ru6 Ru9 101.1(2) . . ?
C601 Ru6 Ru4 136.6(4) . . ?
C200 Ru6 Ru4 60.6(4) . . ?
N3 Ru6 Ru4 122.2(3) . . ?
O10 Ru6 Ru4 45.9(2) . . ?
Ru9 Ru6 Ru4 115.77(6) . . ?
C601 Ru6 Ru7 135.4(5) . . ?
C200 Ru6 Ru7 125.5(4) . . ?
N3 Ru6 Ru7 48.9(3) . . ?
O10 Ru6 Ru7 47.7(2) . . ?
Ru9 Ru6 Ru7 57.97(4) . . ?
Ru4 Ru6 Ru7 86.37(5) . . ?
C601 Ru6 Ru2 117.7(5) . . ?
C200 Ru6 Ru2 102.2(4) . . ?
N3 Ru6 Ru2 86.0(3) . . ?
O10 Ru6 Ru2 52.8(2) . . ?
Ru9 Ru6 Ru2 150.89(5) . . ?
Ru4 Ru6 Ru2 58.09(3) . . ?
Ru7 Ru6 Ru2 92.94(4) . . ?
C702 Ru7 C701 86.7(6) . . ?
C702 Ru7 O10 99.4(5) . . ?
C701 Ru7 O10 170.8(5) . . ?
C702 Ru7 N3 166.8(6) . . ?
C701 Ru7 N3 99.1(5) . . ?
O10 Ru7 N3 76.3(3) . . ?
C702 Ru7 C801 95.7(6) . . ?
C701 Ru7 C801 85.6(6) . . ?
O10 Ru7 C801 87.0(4) . . ?
N3 Ru7 C801 96.5(4) . . ?
C702 Ru7 Ru9 95.3(4) . . ?
C701 Ru7 Ru9 83.7(5) . . ?
O10 Ru7 Ru9 102.3(2) . . ?
N3 Ru7 Ru9 73.7(3) . . ?
C801 Ru7 Ru9 164.2(3) . . ?
C702 Ru7 Ru6 120.3(5) . . ?
C701 Ru7 Ru6 133.4(5) . . ?
O10 Ru7 Ru6 48.5(2) . . ?
N3 Ru7 Ru6 47.7(3) . . ?
C801 Ru7 Ru6 123.9(3) . . ?
Ru9 Ru7 Ru6 58.48(4) . . ?
C702 Ru7 Ru8 98.6(4) . . ?
C701 Ru7 Ru8 125.3(5) . . ?
O10 Ru7 Ru8 47.3(2) . . ?
N3 Ru7 Ru8 87.7(3) . . ?
C801 Ru7 Ru8 39.8(3) . . ?
Ru9 Ru7 Ru8 148.24(5) . . ?
Ru6 Ru7 Ru8 89.93(4) . . ?
C802 Ru8 C801 80.1(6) . . ?
C802 Ru8 N1 96.7(5) . . ?
C801 Ru8 N1 106.3(5) . . ?
C802 Ru8 O20 99.7(5) . . ?
C801 Ru8 O20 178.7(5) . . ?
N1 Ru8 O20 72.5(4) . . ?
C802 Ru8 N5 92.6(6) . . ?
C801 Ru8 N5 100.6(5) . . ?
N1 Ru8 N5 152.6(4) . . ?
O20 Ru8 N5 80.6(4) . . ?
C802 Ru8 O10 175.8(5) . . ?
C801 Ru8 O10 103.1(5) . . ?
N1 Ru8 O10 85.1(3) . . ?
O20 Ru8 O10 77.2(3) . . ?
N5 Ru8 O10 84.1(4) . . ?
C802 Ru8 Ru1 67.0(4) . . ?
C801 Ru8 Ru1 132.1(4) . . ?
N1 Ru8 Ru1 48.4(3) . . ?
O20 Ru8 Ru1 46.9(2) . . ?
N5 Ru8 Ru1 114.1(3) . . ?
O10 Ru8 Ru1 112.0(2) . . ?
C802 Ru8 Ru7 137.8(4) . . ?
C801 Ru8 Ru7 58.1(4) . . ?
N1 Ru8 Ru7 99.5(3) . . ?
O20 Ru8 Ru7 122.3(2) . . ?
N5 Ru8 Ru7 90.4(3) . . ?
O10 Ru8 Ru7 45.1(2) . . ?
Ru1 Ru8 Ru7 146.29(5) . . ?
C802 Ru8 Ru2 128.1(4) . . ?
C801 Ru8 Ru2 134.0(4) . . ?
N1 Ru8 Ru2 43.8(3) . . ?
O20 Ru8 Ru2 45.3(2) . . ?
N5 Ru8 Ru2 111.7(3) . . ?
O10 Ru8 Ru2 51.5(2) . . ?
Ru1 Ru8 Ru2 61.29(4) . . ?
Ru7 Ru8 Ru2 88.98(4) . . ?
C903 Ru9 C902 89.6(11) . . ?
C903 Ru9 C901 91.9(9) . . ?
C902 Ru9 C901 98.0(12) . . ?
C903 Ru9 N4 170.3(6) . . ?
C902 Ru9 N4 92.1(10) . . ?
C901 Ru9 N4 97.3(8) . . ?
C903 Ru9 Ru7 92.0(6) . . ?
C902 Ru9 Ru7 162.8(10) . . ?
C901 Ru9 Ru7 99.1(7) . . ?
N4 Ru9 Ru7 83.6(3) . . ?
C903 Ru9 Ru6 84.0(5) . . ?
C902 Ru9 Ru6 99.7(10) . . ?
C901 Ru9 Ru6 161.9(7) . . ?
N4 Ru9 Ru6 86.3(3) . . ?
Ru7 Ru9 Ru6 63.55(5) . . ?
 
loop_
 _geom_torsion_atom_site_label_1
 _geom_torsion_atom_site_label_2
 _geom_torsion_atom_site_label_3
 _geom_torsion_atom_site_label_4
 _geom_torsion
 _geom_torsion_site_symmetry_1
 _geom_torsion_site_symmetry_2
 _geom_torsion_site_symmetry_3
 _geom_torsion_site_symmetry_4
 _geom_torsion_publ_flag
N2 C1 C2 C3 -3(2) . . . . ?
N1 C1 C2 C3 177.3(13) . . . . ?
C1 C2 C3 C4 0(2) . . . . ?
C2 C3 C4 C5 1(3) . . . . ?
C3 C4 C5 N2 -1(2) . . . . ?
C3 C4 C5 C6 -176.1(15) . . . . ?
N4 C11 C12 C13 0(2) . . . . ?
N3 C11 C12 C13 173.2(14) . . . . ?
C11 C12 C13 C14 -1(3) . . . . ?
C12 C13 C14 C15 2(3) . . . . ?
C13 C14 C15 N4 -2(3) . . . . ?
C13 C14 C15 C16 179(2) . . . . ?
N6 C21 C22 C23 2(2) . . . . ?
N5 C21 C22 C23 178.9(14) . . . . ?
C21 C22 C23 C24 -2(2) . . . . ?
C22 C23 C24 C25 3(3) . . . . ?
C23 C24 C25 N6 -3(2) . . . . ?
C23 C24 C25 C26 175.2(17) . . . . ?
C97 C91 C92 C93 168(7) . . . . ?
C96 C91 C92 C93 0.0 . . . . ?
C93 C94 C95 C96 0.0 . . . . ?
C94 C95 C96 C91 0.0 . . . . ?
C97 C91 C96 C95 -169(6) . . . . ?
C92 C91 C96 C95 0.0 . . . . ?
N2 C1 N1 Ru8 -172.9(9) . . . . ?
C2 C1 N1 Ru8 7(2) . . . . ?
N2 C1 N1 Ru2 39.4(14) . . . . ?
C2 C1 N1 Ru2 -140.5(12) . . . . ?
N2 C1 N1 Ru1 -64.8(12) . . . . ?
C2 C1 N1 Ru1 115.3(13) . . . . ?
N1 C1 N2 C5 -176.5(12) . . . . ?
C2 C1 N2 C5 3.4(19) . . . . ?
N1 C1 N2 Ru3 14.2(13) . . . . ?
C2 C1 N2 Ru3 -165.9(11) . . . . ?
C4 C5 N2 C1 -2(2) . . . . ?
C6 C5 N2 C1 173.9(13) . . . . ?
C4 C5 N2 Ru3 165.5(11) . . . . ?
C6 C5 N2 Ru3 -18.8(19) . . . . ?
C12 C11 N3 Ru6 129.7(12) . . . . ?
N4 C11 N3 Ru6 -56.2(14) . . . . ?
C12 C11 N3 Ru7 -132.2(13) . . . . ?
N4 C11 N3 Ru7 41.8(14) . . . . ?
C12 C11 N4 C15 0(2) . . . . ?
N3 C11 N4 C15 -173.4(13) . . . . ?
C12 C11 N4 Ru9 -176.6(12) . . . . ?
N3 C11 N4 Ru9 9.6(14) . . . . ?
C14 C15 N4 C11 1(2) . . . . ?
C16 C15 N4 C11 -179.8(19) . . . . ?
C14 C15 N4 Ru9 177.3(14) . . . . ?
C16 C15 N4 Ru9 -3(3) . . . . ?
N6 C21 N5 Ru8 86.1(12) . . . . ?
C22 C21 N5 Ru8 -91.1(16) . . . . ?
N6 C21 N5 Ru5 -11.8(10) . . . . ?
C22 C21 N5 Ru5 171.1(14) . . . . ?
N5 C21 N6 C25 -179.7(11) . . . . ?
C22 C21 N6 C25 -2(2) . . . . ?
N5 C21 N6 Ru5 12.3(11) . . . . ?
C22 C21 N6 Ru5 -170.4(13) . . . . ?
C24 C25 N6 C21 3(2) . . . . ?
C26 C25 N6 C21 -175.6(14) . . . . ?
C24 C25 N6 Ru5 162.0(13) . . . . ?
C26 C25 N6 Ru5 -16(2) . . . . ?
C1 N1 Ru1 C102 -18.9(9) . . . . ?
Ru8 N1 Ru1 C102 124.1(5) . . . . ?
Ru2 N1 Ru1 C102 -143.5(5) . . . . ?
C1 N1 Ru1 O20 168.9(8) . . . . ?
Ru8 N1 Ru1 O20 -48.2(3) . . . . ?
Ru2 N1 Ru1 O20 44.3(3) . . . . ?
C1 N1 Ru1 Ru3 65.4(7) . . . . ?
Ru8 N1 Ru1 Ru3 -151.7(3) . . . . ?
Ru2 N1 Ru1 Ru3 -59.2(2) . . . . ?
C1 N1 Ru1 Ru8 -142.9(9) . . . . ?
Ru2 N1 Ru1 Ru8 92.4(4) . . . . ?
C1 N1 Ru1 Ru2 124.6(9) . . . . ?
Ru8 N1 Ru1 Ru2 -92.4(4) . . . . ?
C1 N1 Ru2 C201 19.2(10) . . . . ?
Ru8 N1 Ru2 C201 -141.1(5) . . . . ?
Ru1 N1 Ru2 C201 134.6(4) . . . . ?
C1 N1 Ru2 C202 -90.7(19) . . . . ?
Ru8 N1 Ru2 C202 109.0(16) . . . . ?
Ru1 N1 Ru2 C202 24.6(18) . . . . ?
C1 N1 Ru2 O20 -158.0(10) . . . . ?
Ru8 N1 Ru2 O20 41.7(3) . . . . ?
Ru1 N1 Ru2 O20 -42.6(3) . . . . ?
C1 N1 Ru2 O10 127.4(10) . . . . ?
Ru8 N1 Ru2 O10 -32.9(3) . . . . ?
Ru1 N1 Ru2 O10 -117.2(3) . . . . ?
C1 N1 Ru2 Ru3 -57.1(9) . . . . ?
Ru8 N1 Ru2 Ru3 142.6(4) . . . . ?
Ru1 N1 Ru2 Ru3 58.2(2) . . . . ?
C1 N1 Ru2 Ru4 147.0(8) . . . . ?
Ru8 N1 Ru2 Ru4 -13.3(5) . . . . ?
Ru1 N1 Ru2 Ru4 -97.7(3) . . . . ?
C1 N1 Ru2 Ru6 86.2(9) . . . . ?
Ru8 N1 Ru2 Ru6 -74.1(3) . . . . ?
Ru1 N1 Ru2 Ru6 -158.5(2) . . . . ?
C1 N1 Ru2 Ru1 -115.4(10) . . . . ?
Ru8 N1 Ru2 Ru1 84.3(4) . . . . ?
C1 N1 Ru2 Ru8 160.3(11) . . . . ?
Ru1 N1 Ru2 Ru8 -84.3(4) . . . . ?
C102 Ru1 Ru2 C201 -7.9(8) . . . . ?
C101 Ru1 Ru2 C201 123.1(7) . . . . ?
O20 Ru1 Ru2 C201 -172.8(6) . . . . ?
N1 Ru1 Ru2 C201 -60.5(6) . . . . ?
Ru3 Ru1 Ru2 C201 39.9(5) . . . . ?
Ru8 Ru1 Ru2 C201 -116.4(5) . . . . ?
C102 Ru1 Ru2 C202 -119.4(8) . . . . ?
C101 Ru1 Ru2 C202 11.7(8) . . . . ?
O20 Ru1 Ru2 C202 75.8(6) . . . . ?
N1 Ru1 Ru2 C202 -171.9(6) . . . . ?
Ru3 Ru1 Ru2 C202 -71.5(5) . . . . ?
Ru8 Ru1 Ru2 C202 132.2(5) . . . . ?
C102 Ru1 Ru2 N1 52.6(7) . . . . ?
C101 Ru1 Ru2 N1 -176.4(7) . . . . ?
O20 Ru1 Ru2 N1 -112.3(5) . . . . ?
Ru3 Ru1 Ru2 N1 100.5(4) . . . . ?
Ru8 Ru1 Ru2 N1 -55.8(4) . . . . ?
C102 Ru1 Ru2 O20 164.9(7) . . . . ?
C101 Ru1 Ru2 O20 -64.1(7) . . . . ?
N1 Ru1 Ru2 O20 112.3(5) . . . . ?
Ru3 Ru1 Ru2 O20 -147.2(3) . . . . ?
Ru8 Ru1 Ru2 O20 56.5(3) . . . . ?
C102 Ru1 Ru2 O10 116.4(7) . . . . ?
C101 Ru1 Ru2 O10 -112.6(6) . . . . ?
O20 Ru1 Ru2 O10 -48.5(4) . . . . ?
N1 Ru1 Ru2 O10 63.8(4) . . . . ?
Ru3 Ru1 Ru2 O10 164.2(2) . . . . ?
Ru8 Ru1 Ru2 O10 7.9(2) . . . . ?
C102 Ru1 Ru2 Ru3 -47.9(6) . . . . ?
C101 Ru1 Ru2 Ru3 83.1(6) . . . . ?
O20 Ru1 Ru2 Ru3 147.2(3) . . . . ?
N1 Ru1 Ru2 Ru3 -100.5(4) . . . . ?
Ru8 Ru1 Ru2 Ru3 -156.31(5) . . . . ?
C102 Ru1 Ru2 Ru4 162.4(6) . . . . ?
C101 Ru1 Ru2 Ru4 -66.6(6) . . . . ?
O20 Ru1 Ru2 Ru4 -2.5(3) . . . . ?
N1 Ru1 Ru2 Ru4 109.8(4) . . . . ?
Ru3 Ru1 Ru2 Ru4 -149.76(5) . . . . ?
Ru8 Ru1 Ru2 Ru4 53.93(5) . . . . ?
C102 Ru1 Ru2 Ru6 88.6(6) . . . . ?
C101 Ru1 Ru2 Ru6 -140.4(6) . . . . ?
O20 Ru1 Ru2 Ru6 -76.3(3) . . . . ?
N1 Ru1 Ru2 Ru6 36.0(4) . . . . ?
Ru3 Ru1 Ru2 Ru6 136.44(7) . . . . ?
Ru8 Ru1 Ru2 Ru6 -19.86(7) . . . . ?
C102 Ru1 Ru2 Ru8 108.4(6) . . . . ?
C101 Ru1 Ru2 Ru8 -120.6(6) . . . . ?
O20 Ru1 Ru2 Ru8 -56.5(3) . . . . ?
N1 Ru1 Ru2 Ru8 55.8(4) . . . . ?
Ru3 Ru1 Ru2 Ru8 156.31(5) . . . . ?
C1 N2 Ru3 C303 4(3) . . . . ?
C5 N2 Ru3 C303 -164(2) . . . . ?
C1 N2 Ru3 C301 122.6(9) . . . . ?
C5 N2 Ru3 C301 -45.6(12) . . . . ?
C1 N2 Ru3 C302 -143.8(9) . . . . ?
C5 N2 Ru3 C302 48.1(13) . . . . ?
C1 N2 Ru3 Ru1 26.0(8) . . . . ?
C5 N2 Ru3 Ru1 -142.2(11) . . . . ?
C1 N2 Ru3 Ru2 -41.7(8) . . . . ?
C5 N2 Ru3 Ru2 150.2(12) . . . . ?
C102 Ru1 Ru3 C303 -123.3(7) . . . . ?
C101 Ru1 Ru3 C303 -36.8(7) . . . . ?
O20 Ru1 Ru3 C303 66.9(6) . . . . ?
N1 Ru1 Ru3 C303 135.9(6) . . . . ?
Ru8 Ru1 Ru3 C303 113.2(5) . . . . ?
Ru2 Ru1 Ru3 C303 90.0(5) . . . . ?
C102 Ru1 Ru3 C301 -30.9(6) . . . . ?
C101 Ru1 Ru3 C301 55.6(7) . . . . ?
O20 Ru1 Ru3 C301 159.3(5) . . . . ?
N1 Ru1 Ru3 C301 -131.7(5) . . . . ?
Ru8 Ru1 Ru3 C301 -154.4(4) . . . . ?
Ru2 Ru1 Ru3 C301 -177.6(4) . . . . ?
C102 Ru1 Ru3 C302 160(2) . . . . ?
C101 Ru1 Ru3 C302 -114(2) . . . . ?
O20 Ru1 Ru3 C302 -10(2) . . . . ?
N1 Ru1 Ru3 C302 59(2) . . . . ?
Ru8 Ru1 Ru3 C302 36(2) . . . . ?
Ru2 Ru1 Ru3 C302 13(2) . . . . ?
C102 Ru1 Ru3 N2 62.2(5) . . . . ?
C101 Ru1 Ru3 N2 148.7(6) . . . . ?
O20 Ru1 Ru3 N2 -107.6(3) . . . . ?
N1 Ru1 Ru3 N2 -38.6(4) . . . . ?
Ru8 Ru1 Ru3 N2 -61.3(3) . . . . ?
Ru2 Ru1 Ru3 N2 -84.5(3) . . . . ?
C102 Ru1 Ru3 Ru2 146.7(5) . . . . ?
C101 Ru1 Ru3 Ru2 -126.7(5) . . . . ?
O20 Ru1 Ru3 Ru2 -23.1(2) . . . . ?
N1 Ru1 Ru3 Ru2 45.9(3) . . . . ?
Ru8 Ru1 Ru3 Ru2 23.23(5) . . . . ?
C201 Ru2 Ru3 C303 129.0(7) . . . . ?
C202 Ru2 Ru3 C303 40.6(6) . . . . ?
N1 Ru2 Ru3 C303 -130.0(5) . . . . ?
O20 Ru2 Ru3 C303 -60.9(5) . . . . ?
O10 Ru2 Ru3 C303 -119.8(6) . . . . ?
Ru4 Ru2 Ru3 C303 0.1(5) . . . . ?
Ru6 Ru2 Ru3 C303 143.1(5) . . . . ?
Ru1 Ru2 Ru3 C303 -83.0(5) . . . . ?
Ru8 Ru2 Ru3 C303 -103.7(5) . . . . ?
C201 Ru2 Ru3 C301 -139.4(15) . . . . ?
C202 Ru2 Ru3 C301 132.1(15) . . . . ?
N1 Ru2 Ru3 C301 -38.5(15) . . . . ?
O20 Ru2 Ru3 C301 30.6(15) . . . . ?
O10 Ru2 Ru3 C301 -28.3(16) . . . . ?
Ru4 Ru2 Ru3 C301 91.6(15) . . . . ?
Ru6 Ru2 Ru3 C301 -125.4(15) . . . . ?
Ru1 Ru2 Ru3 C301 8.5(15) . . . . ?
Ru8 Ru2 Ru3 C301 -12.1(15) . . . . ?
C201 Ru2 Ru3 C302 34.4(6) . . . . ?
C202 Ru2 Ru3 C302 -54.0(6) . . . . ?
N1 Ru2 Ru3 C302 135.4(5) . . . . ?
O20 Ru2 Ru3 C302 -155.5(5) . . . . ?
O10 Ru2 Ru3 C302 145.5(6) . . . . ?
Ru4 Ru2 Ru3 C302 -94.5(4) . . . . ?
Ru6 Ru2 Ru3 C302 48.4(4) . . . . ?
Ru1 Ru2 Ru3 C302 -177.7(4) . . . . ?
Ru8 Ru2 Ru3 C302 161.7(4) . . . . ?
C201 Ru2 Ru3 N2 -61.3(5) . . . . ?
C202 Ru2 Ru3 N2 -149.8(5) . . . . ?
N1 Ru2 Ru3 N2 39.6(4) . . . . ?
O20 Ru2 Ru3 N2 108.7(4) . . . . ?
O10 Ru2 Ru3 N2 49.8(5) . . . . ?
Ru4 Ru2 Ru3 N2 169.7(3) . . . . ?
Ru6 Ru2 Ru3 N2 -47.3(3) . . . . ?
Ru1 Ru2 Ru3 N2 86.6(3) . . . . ?
Ru8 Ru2 Ru3 N2 66.0(3) . . . . ?
C201 Ru2 Ru3 Ru1 -147.9(5) . . . . ?
C202 Ru2 Ru3 Ru1 123.6(4) . . . . ?
N1 Ru2 Ru3 Ru1 -47.0(3) . . . . ?
O20 Ru2 Ru3 Ru1 22.1(2) . . . . ?
O10 Ru2 Ru3 Ru1 -36.8(4) . . . . ?
Ru4 Ru2 Ru3 Ru1 83.12(11) . . . . ?
Ru6 Ru2 Ru3 Ru1 -133.92(8) . . . . ?
Ru8 Ru2 Ru3 Ru1 -20.64(4) . . . . ?
O200 C200 Ru4 C401 62.8(14) . . . . ?
Ru6 C200 Ru4 C401 -113.7(6) . . . . ?
O200 C200 Ru4 C402 -24.5(14) . . . . ?
Ru6 C200 Ru4 C402 159.1(6) . . . . ?
O200 C200 Ru4 O10 164.0(13) . . . . ?
Ru6 C200 Ru4 O10 -12.5(4) . . . . ?
O200 C200 Ru4 Ru2 -140.3(13) . . . . ?
Ru6 C200 Ru4 Ru2 43.3(4) . . . . ?
O200 C200 Ru4 Ru6 176.4(16) . . . . ?
C201 Ru2 Ru4 C401 111.8(14) . . . . ?
C202 Ru2 Ru4 C401 -171.3(14) . . . . ?
N1 Ru2 Ru4 C401 -6.9(13) . . . . ?
O20 Ru2 Ru4 C401 -61.2(13) . . . . ?
O10 Ru2 Ru4 C401 20.6(13) . . . . ?
Ru3 Ru2 Ru4 C401 -126.8(13) . . . . ?
Ru6 Ru2 Ru4 C401 77.5(13) . . . . ?
Ru1 Ru2 Ru4 C401 -59.4(13) . . . . ?
Ru8 Ru2 Ru4 C401 -16.2(13) . . . . ?
C201 Ru2 Ru4 C402 -89.0(7) . . . . ?
C202 Ru2 Ru4 C402 -12.2(7) . . . . ?
N1 Ru2 Ru4 C402 152.2(6) . . . . ?
O20 Ru2 Ru4 C402 97.9(6) . . . . ?
O10 Ru2 Ru4 C402 179.8(6) . . . . ?
Ru3 Ru2 Ru4 C402 32.3(5) . . . . ?
Ru6 Ru2 Ru4 C402 -123.4(5) . . . . ?
Ru1 Ru2 Ru4 C402 99.8(5) . . . . ?
Ru8 Ru2 Ru4 C402 142.9(5) . . . . ?
C201 Ru2 Ru4 O10 91.2(5) . . . . ?
C202 Ru2 Ru4 O10 168.1(5) . . . . ?
N1 Ru2 Ru4 O10 -27.6(4) . . . . ?
O20 Ru2 Ru4 O10 -81.8(3) . . . . ?
Ru3 Ru2 Ru4 O10 -147.4(3) . . . . ?
Ru6 Ru2 Ru4 O10 56.8(3) . . . . ?
Ru1 Ru2 Ru4 O10 -80.0(3) . . . . ?
Ru8 Ru2 Ru4 O10 -36.9(3) . . . . ?
C201 Ru2 Ru4 C200 3.8(6) . . . . ?
C202 Ru2 Ru4 C200 80.7(6) . . . . ?
N1 Ru2 Ru4 C200 -114.9(5) . . . . ?
O20 Ru2 Ru4 C200 -169.2(4) . . . . ?
O10 Ru2 Ru4 C200 -87.4(4) . . . . ?
Ru3 Ru2 Ru4 C200 125.2(4) . . . . ?
Ru6 Ru2 Ru4 C200 -30.6(3) . . . . ?
Ru1 Ru2 Ru4 C200 -167.4(3) . . . . ?
Ru8 Ru2 Ru4 C200 -124.3(3) . . . . ?
C201 Ru2 Ru4 Ru5 -178.8(4) . . . . ?
C202 Ru2 Ru4 Ru5 -101.9(4) . . . . ?
N1 Ru2 Ru4 Ru5 62.5(3) . . . . ?
O20 Ru2 Ru4 Ru5 8.2(2) . . . . ?
O10 Ru2 Ru4 Ru5 90.0(3) . . . . ?
Ru3 Ru2 Ru4 Ru5 -57.40(11) . . . . ?
Ru6 Ru2 Ru4 Ru5 146.85(5) . . . . ?
Ru1 Ru2 Ru4 Ru5 10.04(5) . . . . ?
Ru8 Ru2 Ru4 Ru5 53.15(4) . . . . ?
C201 Ru2 Ru4 Ru6 34.4(4) . . . . ?
C202 Ru2 Ru4 Ru6 111.3(4) . . . . ?
N1 Ru2 Ru4 Ru6 -84.4(3) . . . . ?
O20 Ru2 Ru4 Ru6 -138.6(2) . . . . ?
O10 Ru2 Ru4 Ru6 -56.8(3) . . . . ?
Ru3 Ru2 Ru4 Ru6 155.75(11) . . . . ?
Ru1 Ru2 Ru4 Ru6 -136.81(5) . . . . ?
Ru8 Ru2 Ru4 Ru6 -93.70(4) . . . . ?
C21 N6 Ru5 C501 93.0(9) . . . . ?
C25 N6 Ru5 C501 -68.6(16) . . . . ?
C21 N6 Ru5 C502 -180.0(8) . . . . ?
C25 N6 Ru5 C502 18.4(17) . . . . ?
C21 N6 Ru5 O20 -84.8(8) . . . . ?
C25 N6 Ru5 O20 113.6(15) . . . . ?
C21 N6 Ru5 N5 -8.3(7) . . . . ?
C25 N6 Ru5 N5 -169.9(17) . . . . ?
C21 N6 Ru5 Ru4 -21.2(12) . . . . ?
C25 N6 Ru5 Ru4 177.2(12) . . . . ?
C21 N5 Ru5 C501 -77.7(9) . . . . ?
Ru8 N5 Ru5 C501 166.8(6) . . . . ?
C21 N5 Ru5 C502 49(3) . . . . ?
Ru8 N5 Ru5 C502 -66(3) . . . . ?
C21 N5 Ru5 O20 106.2(8) . . . . ?
Ru8 N5 Ru5 O20 -9.2(4) . . . . ?
C21 N5 Ru5 N6 7.9(7) . . . . ?
Ru8 N5 Ru5 N6 -107.5(5) . . . . ?
C21 N5 Ru5 Ru4 -177.6(7) . . . . ?
Ru8 N5 Ru5 Ru4 66.9(3) . . . . ?
C401 Ru4 Ru5 C501 -30.1(7) . . . . ?
C402 Ru4 Ru5 C501 56.8(7) . . . . ?
O10 Ru4 Ru5 C501 -131.6(5) . . . . ?
Ru2 Ru4 Ru5 C501 172.5(5) . . . . ?
Ru6 Ru4 Ru5 C501 -144.4(5) . . . . ?
C401 Ru4 Ru5 C502 -117.8(7) . . . . ?
C402 Ru4 Ru5 C502 -30.9(7) . . . . ?
O10 Ru4 Ru5 C502 140.7(5) . . . . ?
Ru2 Ru4 Ru5 C502 84.8(5) . . . . ?
Ru6 Ru4 Ru5 C502 127.9(5) . . . . ?
C401 Ru4 Ru5 O20 149.2(5) . . . . ?
C402 Ru4 Ru5 O20 -123.9(5) . . . . ?
O10 Ru4 Ru5 O20 47.7(3) . . . . ?
Ru2 Ru4 Ru5 O20 -8.2(2) . . . . ?
Ru6 Ru4 Ru5 O20 34.9(2) . . . . ?
C401 Ru4 Ru5 N6 82.5(8) . . . . ?
C402 Ru4 Ru5 N6 169.4(8) . . . . ?
O10 Ru4 Ru5 N6 -19.0(7) . . . . ?
Ru2 Ru4 Ru5 N6 -74.9(7) . . . . ?
Ru6 Ru4 Ru5 N6 -31.8(7) . . . . ?
C401 Ru4 Ru5 N5 71.0(6) . . . . ?
C402 Ru4 Ru5 N5 158.0(6) . . . . ?
O10 Ru4 Ru5 N5 -30.5(4) . . . . ?
Ru2 Ru4 Ru5 N5 -86.4(3) . . . . ?
Ru6 Ru4 Ru5 N5 -43.2(3) . . . . ?
C11 N3 Ru6 C601 -26.3(12) . . . . ?
Ru7 N3 Ru6 C601 -145.1(6) . . . . ?
C11 N3 Ru6 O10 163.5(11) . . . . ?
Ru7 N3 Ru6 O10 44.8(3) . . . . ?
C11 N3 Ru6 Ru9 57.6(10) . . . . ?
Ru7 N3 Ru6 Ru9 -61.2(2) . . . . ?
C11 N3 Ru6 Ru4 168.3(9) . . . . ?
Ru7 N3 Ru6 Ru4 49.5(4) . . . . ?
C11 N3 Ru6 Ru7 118.8(11) . . . . ?
C11 N3 Ru6 Ru2 -143.8(10) . . . . ?
Ru7 N3 Ru6 Ru2 97.4(3) . . . . ?
C401 Ru4 Ru6 C601 107.1(9) . . . . ?
C402 Ru4 Ru6 C601 3.8(10) . . . . ?
O10 Ru4 Ru6 C601 -165.2(8) . . . . ?
C200 Ru4 Ru6 C601 31.5(9) . . . . ?
Ru5 Ru4 Ru6 C601 -148.1(8) . . . . ?
Ru2 Ru4 Ru6 C601 -98.0(8) . . . . ?
C401 Ru4 Ru6 C200 75.6(7) . . . . ?
C402 Ru4 Ru6 C200 -27.7(8) . . . . ?
O10 Ru4 Ru6 C200 163.3(6) . . . . ?
Ru5 Ru4 Ru6 C200 -179.6(5) . . . . ?
Ru2 Ru4 Ru6 C200 -129.5(5) . . . . ?
C401 Ru4 Ru6 N3 -94.1(6) . . . . ?
C402 Ru4 Ru6 N3 162.6(7) . . . . ?
O10 Ru4 Ru6 N3 -6.4(5) . . . . ?
C200 Ru4 Ru6 N3 -169.7(6) . . . . ?
Ru5 Ru4 Ru6 N3 10.7(4) . . . . ?
Ru2 Ru4 Ru6 N3 60.7(4) . . . . ?
C401 Ru4 Ru6 O10 -87.7(6) . . . . ?
C402 Ru4 Ru6 O10 169.0(7) . . . . ?
C200 Ru4 Ru6 O10 -163.3(6) . . . . ?
Ru5 Ru4 Ru6 O10 17.1(3) . . . . ?
Ru2 Ru4 Ru6 O10 67.1(3) . . . . ?
C401 Ru4 Ru6 Ru9 -7.5(5) . . . . ?
C402 Ru4 Ru6 Ru9 -110.8(7) . . . . ?
O10 Ru4 Ru6 Ru9 80.2(3) . . . . ?
C200 Ru4 Ru6 Ru9 -83.1(5) . . . . ?
Ru5 Ru4 Ru6 Ru9 97.30(8) . . . . ?
Ru2 Ru4 Ru6 Ru9 147.38(6) . . . . ?
C401 Ru4 Ru6 Ru7 -59.1(5) . . . . ?
C402 Ru4 Ru6 Ru7 -162.4(7) . . . . ?
O10 Ru4 Ru6 Ru7 28.6(3) . . . . ?
C200 Ru4 Ru6 Ru7 -134.7(5) . . . . ?
Ru5 Ru4 Ru6 Ru7 45.67(8) . . . . ?
Ru2 Ru4 Ru6 Ru7 95.74(4) . . . . ?
C401 Ru4 Ru6 Ru2 -154.9(5) . . . . ?
C402 Ru4 Ru6 Ru2 101.9(7) . . . . ?
O10 Ru4 Ru6 Ru2 -67.1(3) . . . . ?
C200 Ru4 Ru6 Ru2 129.5(5) . . . . ?
Ru5 Ru4 Ru6 Ru2 -50.08(7) . . . . ?
C201 Ru2 Ru6 C601 -16.7(7) . . . . ?
C202 Ru2 Ru6 C601 69.6(6) . . . . ?
N1 Ru2 Ru6 C601 -109.5(6) . . . . ?
O20 Ru2 Ru6 C601 175.5(5) . . . . ?
O10 Ru2 Ru6 C601 -174.1(6) . . . . ?
Ru3 Ru2 Ru6 C601 -31.8(5) . . . . ?
Ru4 Ru2 Ru6 C601 129.8(5) . . . . ?
Ru1 Ru2 Ru6 C601 -134.7(5) . . . . ?
Ru8 Ru2 Ru6 C601 -151.2(5) . . . . ?
C201 Ru2 Ru6 C200 -103.1(7) . . . . ?
C202 Ru2 Ru6 C200 -16.7(6) . . . . ?
N1 Ru2 Ru6 C200 164.2(5) . . . . ?
O20 Ru2 Ru6 C200 89.1(5) . . . . ?
O10 Ru2 Ru6 C200 99.6(5) . . . . ?
Ru3 Ru2 Ru6 C200 -118.1(4) . . . . ?
Ru4 Ru2 Ru6 C200 43.4(4) . . . . ?
Ru1 Ru2 Ru6 C200 138.9(4) . . . . ?
Ru8 Ru2 Ru6 C200 122.5(4) . . . . ?
C201 Ru2 Ru6 N3 81.3(6) . . . . ?
C202 Ru2 Ru6 N3 167.6(5) . . . . ?
N1 Ru2 Ru6 N3 -11.5(4) . . . . ?
O20 Ru2 Ru6 N3 -86.5(4) . . . . ?
O10 Ru2 Ru6 N3 -76.1(4) . . . . ?
Ru3 Ru2 Ru6 N3 66.2(3) . . . . ?
Ru4 Ru2 Ru6 N3 -132.3(3) . . . . ?
Ru1 Ru2 Ru6 N3 -36.8(3) . . . . ?
Ru8 Ru2 Ru6 N3 -53.2(3) . . . . ?
C201 Ru2 Ru6 O10 157.4(6) . . . . ?
C202 Ru2 Ru6 O10 -116.3(5) . . . . ?
N1 Ru2 Ru6 O10 64.6(4) . . . . ?
O20 Ru2 Ru6 O10 -10.4(4) . . . . ?
Ru3 Ru2 Ru6 O10 142.3(3) . . . . ?
Ru4 Ru2 Ru6 O10 -56.2(3) . . . . ?
Ru1 Ru2 Ru6 O10 39.3(3) . . . . ?
Ru8 Ru2 Ru6 O10 22.9(3) . . . . ?
C201 Ru2 Ru6 Ru9 127.3(5) . . . . ?
C202 Ru2 Ru6 Ru9 -146.4(4) . . . . ?
N1 Ru2 Ru6 Ru9 34.5(3) . . . . ?
O20 Ru2 Ru6 Ru9 -40.5(3) . . . . ?
O10 Ru2 Ru6 Ru9 -30.1(3) . . . . ?
Ru3 Ru2 Ru6 Ru9 112.21(12) . . . . ?
Ru4 Ru2 Ru6 Ru9 -86.25(11) . . . . ?
Ru1 Ru2 Ru6 Ru9 9.24(15) . . . . ?
Ru8 Ru2 Ru6 Ru9 -7.18(11) . . . . ?
C201 Ru2 Ru6 Ru4 -146.4(5) . . . . ?
C202 Ru2 Ru6 Ru4 -60.1(4) . . . . ?
N1 Ru2 Ru6 Ru4 120.8(3) . . . . ?
O20 Ru2 Ru6 Ru4 45.7(2) . . . . ?
O10 Ru2 Ru6 Ru4 56.2(3) . . . . ?
Ru3 Ru2 Ru6 Ru4 -161.54(8) . . . . ?
Ru1 Ru2 Ru6 Ru4 95.50(8) . . . . ?
Ru8 Ru2 Ru6 Ru4 79.08(5) . . . . ?
C201 Ru2 Ru6 Ru7 129.7(5) . . . . ?
C202 Ru2 Ru6 Ru7 -144.0(4) . . . . ?
N1 Ru2 Ru6 Ru7 36.9(3) . . . . ?
O20 Ru2 Ru6 Ru7 -38.1(2) . . . . ?
O10 Ru2 Ru6 Ru7 -27.7(3) . . . . ?
Ru3 Ru2 Ru6 Ru7 114.58(8) . . . . ?
Ru4 Ru2 Ru6 Ru7 -83.88(5) . . . . ?
Ru1 Ru2 Ru6 Ru7 11.61(8) . . . . ?
Ru8 Ru2 Ru6 Ru7 -4.81(4) . . . . ?
C11 N3 Ru7 C702 -91(2) . . . . ?
Ru6 N3 Ru7 C702 27(2) . . . . ?
C11 N3 Ru7 C701 24.2(11) . . . . ?
Ru6 N3 Ru7 C701 142.6(6) . . . . ?
C11 N3 Ru7 O10 -163.9(10) . . . . ?
Ru6 N3 Ru7 O10 -45.6(3) . . . . ?
C11 N3 Ru7 C801 110.8(10) . . . . ?
Ru6 N3 Ru7 C801 -130.9(4) . . . . ?
C11 N3 Ru7 Ru9 -56.4(9) . . . . ?
Ru6 N3 Ru7 Ru9 61.9(3) . . . . ?
C11 N3 Ru7 Ru6 -118.4(10) . . . . ?
C11 N3 Ru7 Ru8 149.6(9) . . . . ?
Ru6 N3 Ru7 Ru8 -92.0(3) . . . . ?
O801 C801 Ru7 C702 87.3(14) . . . . ?
Ru8 C801 Ru7 C702 -96.6(6) . . . . ?
O801 C801 Ru7 C701 1.0(14) . . . . ?
Ru8 C801 Ru7 C701 177.1(6) . . . . ?
O801 C801 Ru7 O10 -173.5(13) . . . . ?
Ru8 C801 Ru7 O10 2.6(4) . . . . ?
O801 C801 Ru7 N3 -97.7(13) . . . . ?
Ru8 C801 Ru7 N3 78.4(5) . . . . ?
O801 C801 Ru7 Ru9 -47(2) . . . . ?
Ru8 C801 Ru7 Ru9 129.4(10) . . . . ?
O801 C801 Ru7 Ru6 -140.1(12) . . . . ?
Ru8 C801 Ru7 Ru6 36.0(6) . . . . ?
O801 C801 Ru7 Ru8 -176.1(16) . . . . ?
C601 Ru6 Ru7 C702 -119.5(8) . . . . ?
C200 Ru6 Ru7 C702 -2.4(7) . . . . ?
N3 Ru6 Ru7 C702 -173.1(6) . . . . ?
O10 Ru6 Ru7 C702 74.7(5) . . . . ?
Ru9 Ru6 Ru7 C702 -76.6(5) . . . . ?
Ru4 Ru6 Ru7 C702 47.0(5) . . . . ?
Ru2 Ru6 Ru7 C702 104.8(5) . . . . ?
C601 Ru6 Ru7 C701 -2.0(10) . . . . ?
C200 Ru6 Ru7 C701 115.1(8) . . . . ?
N3 Ru6 Ru7 C701 -55.6(8) . . . . ?
O10 Ru6 Ru7 C701 -167.8(7) . . . . ?
Ru9 Ru6 Ru7 C701 40.9(7) . . . . ?
Ru4 Ru6 Ru7 C701 164.5(7) . . . . ?
Ru2 Ru6 Ru7 C701 -137.7(7) . . . . ?
C601 Ru6 Ru7 O10 165.8(8) . . . . ?
C200 Ru6 Ru7 O10 -77.1(6) . . . . ?
N3 Ru6 Ru7 O10 112.2(5) . . . . ?
Ru9 Ru6 Ru7 O10 -151.3(3) . . . . ?
Ru4 Ru6 Ru7 O10 -27.7(3) . . . . ?
Ru2 Ru6 Ru7 O10 30.0(3) . . . . ?
C601 Ru6 Ru7 N3 53.6(8) . . . . ?
C200 Ru6 Ru7 N3 170.7(7) . . . . ?
O10 Ru6 Ru7 N3 -112.2(5) . . . . ?
Ru9 Ru6 Ru7 N3 96.5(4) . . . . ?
Ru4 Ru6 Ru7 N3 -139.9(4) . . . . ?
Ru2 Ru6 Ru7 N3 -82.1(4) . . . . ?
C601 Ru6 Ru7 C801 118.4(8) . . . . ?
C200 Ru6 Ru7 C801 -124.5(7) . . . . ?
N3 Ru6 Ru7 C801 64.8(6) . . . . ?
O10 Ru6 Ru7 C801 -47.3(5) . . . . ?
Ru9 Ru6 Ru7 C801 161.4(4) . . . . ?
Ru4 Ru6 Ru7 C801 -75.0(4) . . . . ?
Ru2 Ru6 Ru7 C801 -17.3(4) . . . . ?
C601 Ru6 Ru7 Ru9 -42.9(7) . . . . ?
C200 Ru6 Ru7 Ru9 74.2(5) . . . . ?
N3 Ru6 Ru7 Ru9 -96.5(4) . . . . ?
O10 Ru6 Ru7 Ru9 151.3(3) . . . . ?
Ru4 Ru6 Ru7 Ru9 123.61(5) . . . . ?
Ru2 Ru6 Ru7 Ru9 -178.64(5) . . . . ?
C601 Ru6 Ru7 Ru8 140.5(7) . . . . ?
C200 Ru6 Ru7 Ru8 -102.4(5) . . . . ?
N3 Ru6 Ru7 Ru8 86.9(4) . . . . ?
O10 Ru6 Ru7 Ru8 -25.2(3) . . . . ?
Ru9 Ru6 Ru7 Ru8 -176.53(5) . . . . ?
Ru4 Ru6 Ru7 Ru8 -52.92(4) . . . . ?
Ru2 Ru6 Ru7 Ru8 4.83(4) . . . . ?
C1 N1 Ru8 C802 66.3(14) . . . . ?
Ru2 N1 Ru8 C802 -140.6(6) . . . . ?
Ru1 N1 Ru8 C802 -50.8(5) . . . . ?
C1 N1 Ru8 C801 -15.3(14) . . . . ?
Ru2 N1 Ru8 C801 137.8(5) . . . . ?
Ru1 N1 Ru8 C801 -132.4(5) . . . . ?
C1 N1 Ru8 O20 164.4(14) . . . . ?
Ru2 N1 Ru8 O20 -42.6(3) . . . . ?
Ru1 N1 Ru8 O20 47.3(3) . . . . ?
C1 N1 Ru8 N5 175.4(12) . . . . ?
Ru2 N1 Ru8 N5 -31.6(11) . . . . ?
Ru1 N1 Ru8 N5 58.3(10) . . . . ?
C1 N1 Ru8 O10 -117.5(13) . . . . ?
Ru2 N1 Ru8 O10 35.5(3) . . . . ?
Ru1 N1 Ru8 O10 125.4(3) . . . . ?
C1 N1 Ru8 Ru1 117.1(14) . . . . ?
Ru2 N1 Ru8 Ru1 -89.9(4) . . . . ?
C1 N1 Ru8 Ru7 -74.6(13) . . . . ?
Ru2 N1 Ru8 Ru7 78.4(3) . . . . ?
Ru1 N1 Ru8 Ru7 168.3(2) . . . . ?
C1 N1 Ru8 Ru2 -153.0(15) . . . . ?
Ru1 N1 Ru8 Ru2 89.9(4) . . . . ?
C21 N5 Ru8 C802 14.6(10) . . . . ?
Ru5 N5 Ru8 C802 108.6(5) . . . . ?
C21 N5 Ru8 C801 95.0(10) . . . . ?
Ru5 N5 Ru8 C801 -171.0(5) . . . . ?
C21 N5 Ru8 N1 -95.4(12) . . . . ?
Ru5 N5 Ru8 N1 -1.4(11) . . . . ?
C21 N5 Ru8 O20 -84.8(9) . . . . ?
Ru5 N5 Ru8 O20 9.2(4) . . . . ?
C21 N5 Ru8 O10 -162.7(10) . . . . ?
Ru5 N5 Ru8 O10 -68.8(4) . . . . ?
C21 N5 Ru8 Ru1 -51.2(10) . . . . ?
Ru5 N5 Ru8 Ru1 42.8(4) . . . . ?
C21 N5 Ru8 Ru7 152.5(9) . . . . ?
Ru5 N5 Ru8 Ru7 -113.5(3) . . . . ?
C21 N5 Ru8 Ru2 -118.4(9) . . . . ?
Ru5 N5 Ru8 Ru2 -24.4(4) . . . . ?
C102 Ru1 Ru8 C802 50.4(8) . . . . ?
C101 Ru1 Ru8 C802 -65.4(9) . . . . ?
O20 Ru1 Ru8 C802 -130.4(6) . . . . ?
N1 Ru1 Ru8 C802 123.3(6) . . . . ?
Ru3 Ru1 Ru8 C802 153.5(5) . . . . ?
Ru2 Ru1 Ru8 C802 175.4(5) . . . . ?
C102 Ru1 Ru8 C801 -0.1(8) . . . . ?
C101 Ru1 Ru8 C801 -115.9(9) . . . . ?
O20 Ru1 Ru8 C801 179.1(7) . . . . ?
N1 Ru1 Ru8 C801 72.8(7) . . . . ?
Ru3 Ru1 Ru8 C801 103.0(6) . . . . ?
Ru2 Ru1 Ru8 C801 124.9(6) . . . . ?
C102 Ru1 Ru8 N1 -72.8(7) . . . . ?
C101 Ru1 Ru8 N1 171.3(8) . . . . ?
O20 Ru1 Ru8 N1 106.3(5) . . . . ?
Ru3 Ru1 Ru8 N1 30.3(4) . . . . ?
Ru2 Ru1 Ru8 N1 52.2(4) . . . . ?
C102 Ru1 Ru8 O20 -179.1(6) . . . . ?
C101 Ru1 Ru8 O20 65.0(7) . . . . ?
N1 Ru1 Ru8 O20 -106.3(5) . . . . ?
Ru3 Ru1 Ru8 O20 -76.0(3) . . . . ?
Ru2 Ru1 Ru8 O20 -54.1(3) . . . . ?
C102 Ru1 Ru8 N5 132.5(7) . . . . ?
C101 Ru1 Ru8 N5 16.7(8) . . . . ?
O20 Ru1 Ru8 N5 -48.3(5) . . . . ?
N1 Ru1 Ru8 N5 -154.6(5) . . . . ?
Ru3 Ru1 Ru8 N5 -124.4(3) . . . . ?
Ru2 Ru1 Ru8 N5 -102.5(3) . . . . ?
C102 Ru1 Ru8 O10 -134.0(6) . . . . ?
C101 Ru1 Ru8 O10 110.1(7) . . . . ?
O20 Ru1 Ru8 O10 45.1(4) . . . . ?
N1 Ru1 Ru8 O10 -61.2(4) . . . . ?
Ru3 Ru1 Ru8 O10 -30.9(2) . . . . ?
Ru2 Ru1 Ru8 O10 -9.0(2) . . . . ?
C102 Ru1 Ru8 Ru7 -94.0(6) . . . . ?
C101 Ru1 Ru8 Ru7 150.1(7) . . . . ?
O20 Ru1 Ru8 Ru7 85.1(3) . . . . ?
N1 Ru1 Ru8 Ru7 -21.2(4) . . . . ?
Ru3 Ru1 Ru8 Ru7 9.07(10) . . . . ?
Ru2 Ru1 Ru8 Ru7 30.95(8) . . . . ?
C102 Ru1 Ru8 Ru2 -125.0(6) . . . . ?
C101 Ru1 Ru8 Ru2 119.1(7) . . . . ?
O20 Ru1 Ru8 Ru2 54.1(3) . . . . ?
N1 Ru1 Ru8 Ru2 -52.2(4) . . . . ?
Ru3 Ru1 Ru8 Ru2 -21.89(4) . . . . ?
C702 Ru7 Ru8 C802 80.6(8) . . . . ?
C701 Ru7 Ru8 C802 -11.5(9) . . . . ?
O10 Ru7 Ru8 C802 175.5(7) . . . . ?
N3 Ru7 Ru8 C802 -111.0(7) . . . . ?
C801 Ru7 Ru8 C802 -8.0(8) . . . . ?
Ru9 Ru7 Ru8 C802 -164.3(7) . . . . ?
Ru6 Ru7 Ru8 C802 -158.7(7) . . . . ?
C702 Ru7 Ru8 C801 88.5(7) . . . . ?
C701 Ru7 Ru8 C801 -3.5(7) . . . . ?
O10 Ru7 Ru8 C801 -176.5(6) . . . . ?
N3 Ru7 Ru8 C801 -103.1(6) . . . . ?
Ru9 Ru7 Ru8 C801 -156.4(5) . . . . ?
Ru6 Ru7 Ru8 C801 -150.8(5) . . . . ?
C702 Ru7 Ru8 N1 -168.1(5) . . . . ?
C701 Ru7 Ru8 N1 99.8(6) . . . . ?
O10 Ru7 Ru8 N1 -73.2(4) . . . . ?
N3 Ru7 Ru8 N1 0.2(4) . . . . ?
C801 Ru7 Ru8 N1 103.3(6) . . . . ?
Ru9 Ru7 Ru8 N1 -53.1(3) . . . . ?
Ru6 Ru7 Ru8 N1 -47.5(3) . . . . ?
C702 Ru7 Ru8 O20 -92.9(5) . . . . ?
C701 Ru7 Ru8 O20 175.0(6) . . . . ?
O10 Ru7 Ru8 O20 2.0(4) . . . . ?
N3 Ru7 Ru8 O20 75.5(4) . . . . ?
C801 Ru7 Ru8 O20 178.6(6) . . . . ?
Ru9 Ru7 Ru8 O20 22.2(3) . . . . ?
Ru6 Ru7 Ru8 O20 27.8(3) . . . . ?
C702 Ru7 Ru8 N5 -13.7(6) . . . . ?
C701 Ru7 Ru8 N5 -105.8(6) . . . . ?
O10 Ru7 Ru8 N5 81.2(4) . . . . ?
N3 Ru7 Ru8 N5 154.6(4) . . . . ?
C801 Ru7 Ru8 N5 -102.3(6) . . . . ?
Ru9 Ru7 Ru8 N5 101.3(3) . . . . ?
Ru6 Ru7 Ru8 N5 107.0(3) . . . . ?
C702 Ru7 Ru8 O10 -94.9(5) . . . . ?
C701 Ru7 Ru8 O10 173.0(6) . . . . ?
N3 Ru7 Ru8 O10 73.4(4) . . . . ?
C801 Ru7 Ru8 O10 176.5(6) . . . . ?
Ru9 Ru7 Ru8 O10 20.1(3) . . . . ?
Ru6 Ru7 Ru8 O10 25.7(3) . . . . ?
C702 Ru7 Ru8 Ru1 -152.2(5) . . . . ?
C701 Ru7 Ru8 Ru1 115.7(6) . . . . ?
O10 Ru7 Ru8 Ru1 -57.3(3) . . . . ?
N3 Ru7 Ru8 Ru1 16.1(3) . . . . ?
C801 Ru7 Ru8 Ru1 119.2(5) . . . . ?
Ru9 Ru7 Ru8 Ru1 -37.17(15) . . . . ?
Ru6 Ru7 Ru8 Ru1 -31.55(9) . . . . ?
C702 Ru7 Ru8 Ru2 -125.4(5) . . . . ?
C701 Ru7 Ru8 Ru2 142.5(6) . . . . ?
O10 Ru7 Ru8 Ru2 -30.5(3) . . . . ?
N3 Ru7 Ru8 Ru2 43.0(3) . . . . ?
C801 Ru7 Ru8 Ru2 146.0(5) . . . . ?
Ru9 Ru7 Ru8 Ru2 -10.35(10) . . . . ?
Ru6 Ru7 Ru8 Ru2 -4.73(4) . . . . ?
C201 Ru2 Ru8 C802 106.0(8) . . . . ?
C202 Ru2 Ru8 C802 -101.6(9) . . . . ?
N1 Ru2 Ru8 C802 53.1(8) . . . . ?
O20 Ru2 Ru8 C802 -61.7(7) . . . . ?
O10 Ru2 Ru8 C802 -174.6(7) . . . . ?
Ru3 Ru2 Ru8 C802 15.2(6) . . . . ?
Ru4 Ru2 Ru8 C802 -138.3(6) . . . . ?
Ru6 Ru2 Ru8 C802 162.6(6) . . . . ?
Ru1 Ru2 Ru8 C802 -5.4(6) . . . . ?
C201 Ru2 Ru8 C801 -10.8(8) . . . . ?
C202 Ru2 Ru8 C801 141.6(8) . . . . ?
N1 Ru2 Ru8 C801 -63.7(7) . . . . ?
O20 Ru2 Ru8 C801 -178.5(7) . . . . ?
O10 Ru2 Ru8 C801 68.5(6) . . . . ?
Ru3 Ru2 Ru8 C801 -101.6(6) . . . . ?
Ru4 Ru2 Ru8 C801 104.9(6) . . . . ?
Ru6 Ru2 Ru8 C801 45.8(6) . . . . ?
Ru1 Ru2 Ru8 C801 -122.2(6) . . . . ?
C201 Ru2 Ru8 N1 52.9(7) . . . . ?
C202 Ru2 Ru8 N1 -154.7(7) . . . . ?
O20 Ru2 Ru8 N1 -114.8(5) . . . . ?
O10 Ru2 Ru8 N1 132.3(5) . . . . ?
Ru3 Ru2 Ru8 N1 -37.9(4) . . . . ?
Ru4 Ru2 Ru8 N1 168.6(4) . . . . ?
Ru6 Ru2 Ru8 N1 109.5(4) . . . . ?
Ru1 Ru2 Ru8 N1 -58.5(4) . . . . ?
C201 Ru2 Ru8 O20 167.7(6) . . . . ?
C202 Ru2 Ru8 O20 -39.9(7) . . . . ?
N1 Ru2 Ru8 O20 114.8(5) . . . . ?
O10 Ru2 Ru8 O20 -113.0(4) . . . . ?
Ru3 Ru2 Ru8 O20 76.9(3) . . . . ?
Ru4 Ru2 Ru8 O20 -76.6(3) . . . . ?
Ru6 Ru2 Ru8 O20 -135.7(3) . . . . ?
Ru1 Ru2 Ru8 O20 56.3(3) . . . . ?
C201 Ru2 Ru8 N5 -142.1(6) . . . . ?
C202 Ru2 Ru8 N5 10.3(7) . . . . ?
N1 Ru2 Ru8 N5 165.0(5) . . . . ?
O20 Ru2 Ru8 N5 50.2(5) . . . . ?
O10 Ru2 Ru8 N5 -62.8(4) . . . . ?
Ru3 Ru2 Ru8 N5 127.1(3) . . . . ?
Ru4 Ru2 Ru8 N5 -26.4(3) . . . . ?
Ru6 Ru2 Ru8 N5 -85.5(3) . . . . ?
Ru1 Ru2 Ru8 N5 106.5(3) . . . . ?
C201 Ru2 Ru8 O10 -79.4(6) . . . . ?
C202 Ru2 Ru8 O10 73.0(7) . . . . ?
N1 Ru2 Ru8 O10 -132.3(5) . . . . ?
O20 Ru2 Ru8 O10 113.0(4) . . . . ?
Ru3 Ru2 Ru8 O10 -170.2(3) . . . . ?
Ru4 Ru2 Ru8 O10 36.3(3) . . . . ?
Ru6 Ru2 Ru8 O10 -22.7(3) . . . . ?
Ru1 Ru2 Ru8 O10 169.3(3) . . . . ?
C201 Ru2 Ru8 Ru1 111.4(5) . . . . ?
C202 Ru2 Ru8 Ru1 -96.2(6) . . . . ?
N1 Ru2 Ru8 Ru1 58.5(4) . . . . ?
O20 Ru2 Ru8 Ru1 -56.3(3) . . . . ?
O10 Ru2 Ru8 Ru1 -169.3(3) . . . . ?
Ru3 Ru2 Ru8 Ru1 20.55(4) . . . . ?
Ru4 Ru2 Ru8 Ru1 -132.95(5) . . . . ?
Ru6 Ru2 Ru8 Ru1 167.99(4) . . . . ?
C201 Ru2 Ru8 Ru7 -52.0(5) . . . . ?
C202 Ru2 Ru8 Ru7 100.3(6) . . . . ?
N1 Ru2 Ru8 Ru7 -104.9(4) . . . . ?
O20 Ru2 Ru8 Ru7 140.3(3) . . . . ?
O10 Ru2 Ru8 Ru7 27.3(3) . . . . ?
Ru3 Ru2 Ru8 Ru7 -142.86(5) . . . . ?
Ru4 Ru2 Ru8 Ru7 63.64(5) . . . . ?
Ru6 Ru2 Ru8 Ru7 4.57(4) . . . . ?
Ru1 Ru2 Ru8 Ru7 -163.41(4) . . . . ?
C11 N4 Ru9 C902 123.4(14) . . . . ?
C15 N4 Ru9 C902 -53.2(17) . . . . ?
C11 N4 Ru9 C901 -138.3(12) . . . . ?
C15 N4 Ru9 C901 45.1(15) . . . . ?
C11 N4 Ru9 Ru7 -39.9(10) . . . . ?
C15 N4 Ru9 Ru7 143.5(14) . . . . ?
C11 N4 Ru9 Ru6 23.9(10) . . . . ?
C15 N4 Ru9 Ru6 -152.7(14) . . . . ?
C702 Ru7 Ru9 C903 40.2(6) . . . . ?
C701 Ru7 Ru9 C903 126.3(7) . . . . ?
O10 Ru7 Ru9 C903 -60.7(5) . . . . ?
N3 Ru7 Ru9 C903 -132.3(5) . . . . ?
C801 Ru7 Ru9 C903 174.1(13) . . . . ?
Ru6 Ru7 Ru9 C903 -82.3(5) . . . . ?
Ru8 Ru7 Ru9 C903 -75.7(5) . . . . ?
C702 Ru7 Ru9 C902 135(3) . . . . ?
C701 Ru7 Ru9 C902 -139(3) . . . . ?
O10 Ru7 Ru9 C902 34(3) . . . . ?
N3 Ru7 Ru9 C902 -37(3) . . . . ?
C801 Ru7 Ru9 C902 -91(3) . . . . ?
Ru6 Ru7 Ru9 C902 13(3) . . . . ?
Ru8 Ru7 Ru9 C902 19(3) . . . . ?
C702 Ru7 Ru9 C901 -52.1(9) . . . . ?
C701 Ru7 Ru9 C901 34.0(9) . . . . ?
O10 Ru7 Ru9 C901 -153.0(8) . . . . ?
N3 Ru7 Ru9 C901 135.4(8) . . . . ?
C801 Ru7 Ru9 C901 81.9(14) . . . . ?
Ru6 Ru7 Ru9 C901 -174.6(8) . . . . ?
Ru8 Ru7 Ru9 C901 -168.0(8) . . . . ?
C702 Ru7 Ru9 N4 -148.5(6) . . . . ?
C701 Ru7 Ru9 N4 -62.4(6) . . . . ?
O10 Ru7 Ru9 N4 110.6(4) . . . . ?
N3 Ru7 Ru9 N4 39.0(4) . . . . ?
C801 Ru7 Ru9 N4 -14.5(12) . . . . ?
Ru6 Ru7 Ru9 N4 89.0(4) . . . . ?
Ru8 Ru7 Ru9 N4 95.6(4) . . . . ?
C702 Ru7 Ru9 Ru6 122.5(4) . . . . ?
C701 Ru7 Ru9 Ru6 -151.4(5) . . . . ?
O10 Ru7 Ru9 Ru6 21.6(2) . . . . ?
N3 Ru7 Ru9 Ru6 -50.0(3) . . . . ?
C801 Ru7 Ru9 Ru6 -103.5(12) . . . . ?
Ru8 Ru7 Ru9 Ru6 6.60(10) . . . . ?
C601 Ru6 Ru9 C903 -113.4(8) . . . . ?
C200 Ru6 Ru9 C903 -32.7(7) . . . . ?
N3 Ru6 Ru9 C903 146.3(7) . . . . ?
O10 Ru6 Ru9 C903 74.0(6) . . . . ?
Ru4 Ru6 Ru9 C903 27.8(6) . . . . ?
Ru7 Ru6 Ru9 C903 95.2(6) . . . . ?
Ru2 Ru6 Ru9 C903 98.0(6) . . . . ?
C601 Ru6 Ru9 C902 -24.8(10) . . . . ?
C200 Ru6 Ru9 C902 55.9(10) . . . . ?
N3 Ru6 Ru9 C902 -125.1(10) . . . . ?
O10 Ru6 Ru9 C902 162.6(9) . . . . ?
Ru4 Ru6 Ru9 C902 116.4(9) . . . . ?
Ru7 Ru6 Ru9 C902 -176.2(9) . . . . ?
Ru2 Ru6 Ru9 C902 -173.4(9) . . . . ?
C601 Ru6 Ru9 C901 169(2) . . . . ?
C200 Ru6 Ru9 C901 -111(2) . . . . ?
N3 Ru6 Ru9 C901 69(2) . . . . ?
O10 Ru6 Ru9 C901 -4(2) . . . . ?
Ru4 Ru6 Ru9 C901 -50(2) . . . . ?
Ru7 Ru6 Ru9 C901 17(2) . . . . ?
Ru2 Ru6 Ru9 C901 20(2) . . . . ?
C601 Ru6 Ru9 N4 66.7(6) . . . . ?
C200 Ru6 Ru9 N4 147.4(5) . . . . ?
N3 Ru6 Ru9 N4 -33.6(4) . . . . ?
O10 Ru6 Ru9 N4 -105.9(4) . . . . ?
Ru4 Ru6 Ru9 N4 -152.1(3) . . . . ?
Ru7 Ru6 Ru9 N4 -84.7(3) . . . . ?
Ru2 Ru6 Ru9 N4 -81.9(4) . . . . ?
C601 Ru6 Ru9 Ru7 151.4(4) . . . . ?
C200 Ru6 Ru9 Ru7 -127.9(4) . . . . ?
N3 Ru6 Ru9 Ru7 51.1(3) . . . . ?
O10 Ru6 Ru9 Ru7 -21.2(2) . . . . ?
Ru4 Ru6 Ru9 Ru7 -67.37(6) . . . . ?
Ru2 Ru6 Ru9 Ru7 2.79(11) . . . . ?
 
_diffrn_measured_fraction_theta_max    0.973
_diffrn_reflns_theta_full              23.31
_diffrn_measured_fraction_theta_full   0.973
_refine_diff_density_max    1.477
_refine_diff_density_min   -1.224
_refine_diff_density_rms    0.227

#===END
